# Supplementary material for: Droplet activation behaviour of atmospheric black carbon particles in fog as a function of their size and mixing state
Source: Copernicus journal article supplement (doi:10.5194/acp-19-2183-2019), 2019-02-20
Supplement: Supplementary file 2 [file acp-19-2183-2019-supplement.zip]

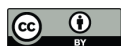

## *Supplement of*

# **Droplet activation behaviour of atmospheric black carbon particles in fog as a function of their size and mixing state**

**Ghislain Motos et al.**

*Correspondence to:* Martin Gysel-Beer ([martin.gysel@psi.ch](mailto:martin.gysel@psi.ch))

- [acp-19-2183-2019-supplement-title-page.pdf](#)
- [acp-2018-811-supplement.pdf](#)
- [acp-2018\\_811\\_Datasets.xlsx](#)

The copyright of individual parts of the supplement might differ from the CC BY 4.0 License.
