# Supplementary material for: Droplet activation behaviour of atmospheric black carbon particles in fog as a function of their size and mixing state
Source: Copernicus journal article supplement (doi:10.5194/acp-19-2183-2019), 2019-02-20
Supplement: Supplementary file 3 [file acp-19-2183-2019-supplement.zip]

Archive with 3 entries (3 files):
- acp-19-2183-2019-supplement-title-page.pdf
- acp-2018-811-supplement.pdf
- acp-2018_811_Datasets.xlsx
