# Supplementary material for: Droplet activation behaviour of atmospheric black carbon particles in fog as a function of their size and mixing state
Source: Copernicus journal article supplement (doi:10.5194/acp-19-2183-2019), 2019-02-20
Supplement: Supplementary file 3 [file acp-19-2183-2019-supplement.zip › acp-2018_811_Datasets.xlsx]

## Sheet: Aethalometer
Date and time	eBC concentration [ug m-3] 880 nm
2015-12-13 00:01:00	1.834
2015-12-13 00:02:00	1.627
2015-12-13 00:03:00	1.558
2015-12-13 00:04:00	1.651
2015-12-13 00:05:00	1.422
2015-12-13 00:06:00	1.727
2015-12-13 00:07:00	1.699
2015-12-13 00:08:00	2.128
2015-12-13 00:09:00	2.118
2015-12-13 00:10:00	2.229
2015-12-13 00:11:00	2.078
2015-12-13 00:12:00	2
2015-12-13 00:13:00	2.539
2015-12-13 00:14:00	2.259
2015-12-13 00:15:00	2.254
2015-12-13 00:16:00	2.624
2015-12-13 00:17:00	2.229
2015-12-13 00:18:00	2.309
2015-12-13 00:19:00	2.495
2015-12-13 00:20:00	2.213
2015-12-13 00:21:00	2.6
2015-12-13 00:22:00	2.499
2015-12-13 00:23:00	2.543
2015-12-13 00:24:00	2.677
2015-12-13 00:25:00	2.533
2015-12-13 00:26:00	2.528
2015-12-13 00:27:00	2.694
2015-12-13 00:28:00	2.376
2015-12-13 00:29:00	2.821
2015-12-13 00:30:00	2.812
2015-12-13 00:31:00	2.705
2015-12-13 00:32:00	3.027
2015-12-13 00:33:00	2.951
2015-12-13 00:34:00	2.991
2015-12-13 00:35:00	3.064
2015-12-13 00:36:00	3.288
2015-12-13 00:37:00	3.043
2015-12-13 00:38:00	3.073
2015-12-13 00:39:00	3.267
2015-12-13 00:40:00	3.297
2015-12-13 00:41:00	3.237
2015-12-13 00:42:00	3.219
2015-12-13 00:43:00	3.382
2015-12-13 00:44:00	3.33
2015-12-13 00:45:00	3.298
2015-12-13 00:46:00	3.402
2015-12-13 00:47:00	3.464
2015-12-13 00:48:00	3.274
2015-12-13 00:49:00	3.277
2015-12-13 00:50:00	3.25
2015-12-13 00:51:00	3.436
2015-12-13 00:52:00	3.15
2015-12-13 00:53:00	3.307
2015-12-13 00:54:00	3.366
2015-12-13 00:55:00	3.238
2015-12-13 00:56:00	3.157
2015-12-13 00:57:00	3.291
2015-12-13 00:58:00	3.006
2015-12-13 00:59:00	3.039
2015-12-13 01:00:00	3.108
2015-12-13 01:01:00	2.834
2015-12-13 01:02:00	2.741
2015-12-13 01:03:00	2.831
2015-12-13 01:04:00	2.846
2015-12-13 01:05:00	2.573
2015-12-13 01:06:00	2.283
2015-12-13 01:07:00	2.037
2015-12-13 01:08:00	1.876
2015-12-13 01:09:00	1.685
2015-12-13 01:10:00	1.992
2015-12-13 01:11:00	1.642
2015-12-13 01:12:00	1.645
2015-12-13 01:13:00	1.111
2015-12-13 01:14:00	1.044
2015-12-13 01:15:00	1.045
2015-12-13 01:16:00	0.826
2015-12-13 01:17:00	0.858
2015-12-13 01:18:00	1.016
2015-12-13 01:19:00	0.931
2015-12-13 01:20:00	0.92
2015-12-13 01:21:00	0.654
2015-12-13 01:22:00	0.923
2015-12-13 01:23:00	1.109
2015-12-13 01:24:00	0.768
2015-12-13 01:25:00	0.815
2015-12-13 01:26:00	1.032
2015-12-13 01:27:00	1.057
2015-12-13 01:28:00	1.1
2015-12-13 01:29:00	1.156
2015-12-13 01:30:00	1.436
2015-12-13 01:31:00	1.806
2015-12-13 01:32:00	1.421
2015-12-13 01:33:00	1.902
2015-12-13 01:34:00	1.988
2015-12-13 01:35:00	2.14
2015-12-13 01:36:00	2.023
2015-12-13 01:37:00	2.325
2015-12-13 01:38:00	2.254
2015-12-13 01:39:00	2.575
2015-12-13 01:40:00	2.543
2015-12-13 01:41:00	2.585
2015-12-13 01:42:00	2.863
2015-12-13 01:43:00	2.679
2015-12-13 01:44:00	2.873
2015-12-13 01:45:00	2.612
2015-12-13 01:46:00	2.589
2015-12-13 01:47:00	2.48
2015-12-13 01:48:00	2.394
2015-12-13 01:49:00	2.508
2015-12-13 01:50:00	2.287
2015-12-13 01:51:00	2.519
2015-12-13 01:52:00	2.468
2015-12-13 01:53:00	2.592
2015-12-13 01:54:00	2.392
2015-12-13 01:55:00	2.409
2015-12-13 01:56:00	2.55
2015-12-13 01:57:00	2.189
2015-12-13 01:58:00	2.386
2015-12-13 01:59:00	2.37
2015-12-13 02:00:00	2.253
2015-12-13 02:01:00	2.639
2015-12-13 02:02:00	2.558
2015-12-13 02:03:00	2.351
2015-12-13 02:04:00	2.518
2015-12-13 02:05:00	2.446
2015-12-13 02:06:00	2.495
2015-12-13 02:07:00	2.403
2015-12-13 02:08:00	2.276
2015-12-13 02:09:00	2.31
2015-12-13 02:10:00	1.552
2015-12-13 02:11:00	1.6
2015-12-13 02:12:00	1.376
2015-12-13 02:13:00	1.703
2015-12-13 02:14:00	1.407
2015-12-13 02:15:00	1.574
2015-12-13 02:16:00	1.518
2015-12-13 02:17:00	1.651
2015-12-13 02:18:00	1.775
2015-12-13 02:19:00	1.549
2015-12-13 02:20:00	1.728
2015-12-13 02:21:00	1.318
2015-12-13 02:22:00	1.297
2015-12-13 02:23:00	1.614
2015-12-13 02:24:00	1.299
2015-12-13 02:25:00	1.52
2015-12-13 02:26:00	1.306
2015-12-13 02:27:00	1.596
2015-12-13 02:28:00	1.312
2015-12-13 02:29:00	1.482
2015-12-13 02:30:00	1.413
2015-12-13 02:31:00	1.458
2015-12-13 02:32:00	1.348
2015-12-13 02:33:00	1.476
2015-12-13 02:34:00	1.529
2015-12-13 02:35:00	1.731
2015-12-13 02:36:00	1.744
2015-12-13 02:37:00	1.806
2015-12-13 02:38:00	1.434
2015-12-13 02:39:00	1.896
2015-12-13 02:40:00	1.465
2015-12-13 02:41:00	1.534
2015-12-13 02:42:00	1.388
2015-12-13 02:43:00	1.753
2015-12-13 02:44:00	1.758
2015-12-13 02:45:00	1.706
2015-12-13 02:46:00	1.401
2015-12-13 02:47:00	1.52
2015-12-13 02:48:00	1.585
2015-12-13 02:49:00	1.422
2015-12-13 02:50:00	1.59
2015-12-13 02:51:00	1.272
2015-12-13 02:52:00	1.445
2015-12-13 02:53:00	1.13
2015-12-13 02:54:00	1.59
2015-12-13 02:55:00	1.064
2015-12-13 02:56:00	1.493
2015-12-13 02:57:00	1.374
2015-12-13 02:58:00	1.401
2015-12-13 02:59:00	1.733
2015-12-13 03:00:00	1.703
2015-12-13 03:01:00	1.932
2015-12-13 03:02:00	2.292
2015-12-13 03:03:00	1.922
2015-12-13 03:04:00	2.094
2015-12-13 03:05:00	2.111
2015-12-13 03:06:00	1.974
2015-12-13 03:07:00	2.08
2015-12-13 03:08:00	2.4
2015-12-13 03:09:00	2.115
2015-12-13 03:10:00	2.097
2015-12-13 03:11:00	2.057
2015-12-13 03:12:00	2.391
2015-12-13 03:13:00	2.343
2015-12-13 03:14:00	2.458
2015-12-13 03:15:00	2.515
2015-12-13 03:16:00	2.704
2015-12-13 03:17:00	2.503
2015-12-13 03:18:00	2.452
2015-12-13 03:19:00	2.403
2015-12-13 03:20:00	2.508
2015-12-13 03:21:00	2.405
2015-12-13 03:22:00	2.251
2015-12-13 03:23:00	2.304
2015-12-13 03:24:00	2.415
2015-12-13 03:25:00	2.348
2015-12-13 03:26:00	2.402
2015-12-13 03:27:00	2.246
2015-12-13 03:28:00	2.329
2015-12-13 03:29:00	2.146
2015-12-13 03:30:00	2.395
2015-12-13 03:31:00	2.302
2015-12-13 03:32:00	2.417
2015-12-13 03:33:00	2.297
2015-12-13 03:34:00	2.413
2015-12-13 03:35:00	2.383
2015-12-13 03:36:00	2.476
2015-12-13 03:37:00	2.476
2015-12-13 03:38:00	2.507
2015-12-13 03:39:00	2.426
2015-12-13 03:40:00	2.214
2015-12-13 03:41:00	2.137
2015-12-13 03:42:00	2.007
2015-12-13 03:43:00	2.213
2015-12-13 03:44:00	2.367
2015-12-13 03:45:00	2.314
2015-12-13 03:46:00	2.262
2015-12-13 03:47:00	2.405
2015-12-13 03:48:00	2.512
2015-12-13 03:49:00	2.255
2015-12-13 03:50:00	2.164
2015-12-13 03:51:00	2.115
2015-12-13 03:52:00	1.816
2015-12-13 03:53:00	1.794
2015-12-13 03:54:00	1.852
2015-12-13 03:55:00	1.721
2015-12-13 03:56:00	2.034
2015-12-13 03:57:00	2.325
2015-12-13 03:58:00	2.056
2015-12-13 03:59:00	2.328
2015-12-13 04:00:00	2.02
2015-12-13 04:01:00	2.23
2015-12-13 04:02:00	2.016
2015-12-13 04:03:00	2.034
2015-12-13 04:04:00	2.172
2015-12-13 04:05:00	2.494
2015-12-13 04:06:00	2.271
2015-12-13 04:07:00	2.185
2015-12-13 04:08:00	2.453
2015-12-13 04:09:00	2.28
2015-12-13 04:10:00	2.187
2015-12-13 04:11:00	2.159
2015-12-13 04:12:00	2.482
2015-12-13 04:13:00	2.126
2015-12-13 04:14:00	2.153
2015-12-13 04:15:00	2.604
2015-12-13 04:16:00	2.296
2015-12-13 04:17:00	2.7
2015-12-13 04:18:00	2.436
2015-12-13 04:19:00	2.511
2015-12-13 04:20:00	2.476
2015-12-13 04:21:00	2.452
2015-12-13 04:22:00	2.687
2015-12-13 04:23:00	2.633
2015-12-13 04:24:00	2.575
2015-12-13 04:25:00	2.14
2015-12-13 04:26:00	2.444
2015-12-13 04:27:00	2.265
2015-12-13 04:28:00	2.34
2015-12-13 04:29:00	2.382
2015-12-13 04:30:00	2.59
2015-12-13 04:31:00	2.263
2015-12-13 04:32:00	2.271
2015-12-13 04:33:00	2.317
2015-12-13 04:34:00	2.178
2015-12-13 04:35:00	1.734
2015-12-13 04:36:00	2.03
2015-12-13 04:37:00	1.885
2015-12-13 04:38:00	1.58
2015-12-13 04:39:00	1.948
2015-12-13 04:40:00	1.168
2015-12-13 04:41:00	1.654
2015-12-13 04:42:00	1.157
2015-12-13 04:43:00	1.463
2015-12-13 04:44:00	1.251
2015-12-13 04:45:00	1.348
2015-12-13 04:46:00	1.494
2015-12-13 04:47:00	1.318
2015-12-13 04:48:00	1.198
2015-12-13 04:49:00	1.483
2015-12-13 04:50:00	1.367
2015-12-13 04:51:00	1.444
2015-12-13 04:52:00	1.245
2015-12-13 04:53:00	1.482
2015-12-13 04:54:00	1.232
2015-12-13 04:55:00	1.437
2015-12-13 04:56:00	1.51
2015-12-13 04:57:00	1.418
2015-12-13 04:58:00	1.416
2015-12-13 04:59:00	1.356
2015-12-13 05:00:00	1.221
2015-12-13 05:01:00	1.432
2015-12-13 05:02:00	1.385
2015-12-13 05:03:00	1.46
2015-12-13 05:04:00	1.505
2015-12-13 05:05:00	1.175
2015-12-13 05:06:00	1.307
2015-12-13 05:07:00	1.349
2015-12-13 05:08:00	1.237
2015-12-13 05:09:00	1.224
2015-12-13 05:10:00	1.322
2015-12-13 05:11:00	1.082
2015-12-13 05:12:00	1.263
2015-12-13 05:13:00	1.068
2015-12-13 05:14:00	1.195
2015-12-13 05:15:00	0.979
2015-12-13 05:16:00	0.888
2015-12-13 05:17:00	0.95
2015-12-13 05:18:00	1.017
2015-12-13 05:19:00	0.973
2015-12-13 05:20:00	1.031
2015-12-13 05:21:00	1.02
2015-12-13 05:22:00	1.092
2015-12-13 05:23:00	0.899
2015-12-13 05:24:00	1.009
2015-12-13 05:25:00	0.939
2015-12-13 05:26:00	1.028
2015-12-13 05:27:00	0.93
2015-12-13 05:28:00	1.042
2015-12-13 05:29:00	1.034
2015-12-13 05:30:00	1.092
2015-12-13 05:31:00	1.215
2015-12-13 05:32:00	1.133
2015-12-13 05:33:00	1.124
2015-12-13 05:34:00	0.957
2015-12-13 05:35:00	1.163
2015-12-13 05:36:00	1.389
2015-12-13 05:37:00	1.23
2015-12-13 05:38:00	1.311
2015-12-13 05:39:00	1.367
2015-12-13 05:40:00	1.201
2015-12-13 05:41:00	1.169
2015-12-13 05:42:00	1.316
2015-12-13 05:43:00	1.232
2015-12-13 05:44:00	1.356
2015-12-13 05:45:00	1.199
2015-12-13 05:46:00	1.26
2015-12-13 05:47:00	1.136
2015-12-13 05:48:00	1.026
2015-12-13 05:49:00	1
2015-12-13 05:50:00	0.999
2015-12-13 05:51:00	1.021
2015-12-13 05:52:00	1.271
2015-12-13 05:53:00	1.017
2015-12-13 05:54:00	1.014
2015-12-13 05:55:00	0.964
2015-12-13 05:56:00	0.934
2015-12-13 05:57:00	1.045
2015-12-13 05:58:00	1.117
2015-12-13 05:59:00	0.836
2015-12-13 06:00:00	0.951
2015-12-13 06:01:00	1.087
2015-12-13 06:02:00	1.413
2015-12-13 06:03:00	1.409
2015-12-13 06:04:00	1.533
2015-12-13 06:05:00	1.505
2015-12-13 06:06:00	1.649
2015-12-13 06:07:00	1.698
2015-12-13 06:08:00	1.536
2015-12-13 06:09:00	1.621
2015-12-13 06:10:00	1.721
2015-12-13 06:11:00	1.738
2015-12-13 06:12:00	1.727
2015-12-13 06:13:00	1.64
2015-12-13 06:14:00	1.572
2015-12-13 06:15:00	1.691
2015-12-13 06:16:00	1.587
2015-12-13 06:17:00	1.555
2015-12-13 06:18:00	1.692
2015-12-13 06:19:00	1.547
2015-12-13 06:20:00	1.725
2015-12-13 06:21:00	1.586
2015-12-13 06:22:00	1.516
2015-12-13 06:23:00	1.501
2015-12-13 06:24:00	1.344
2015-12-13 06:25:00	1.499
2015-12-13 06:26:00	1.544
2015-12-13 06:27:00	1.53
2015-12-13 06:28:00	1.747
2015-12-13 06:29:00	1.539
2015-12-13 06:30:00	1.412
2015-12-13 06:31:00	1.386
2015-12-13 06:32:00	1.421
2015-12-13 06:33:00	1.606
2015-12-13 06:34:00	1.532
2015-12-13 06:35:00	1.416
2015-12-13 06:36:00	1.292
2015-12-13 06:37:00	1.429
2015-12-13 06:38:00	1.502
2015-12-13 06:39:00	1.415
2015-12-13 06:40:00	1.312
2015-12-13 06:41:00	1.268
2015-12-13 06:42:00	1.282
2015-12-13 06:43:00	1.552
2015-12-13 06:44:00	1.5
2015-12-13 06:45:00	1.384
2015-12-13 06:46:00	1.335
2015-12-13 06:47:00	1.036
2015-12-13 06:48:00	1.176
2015-12-13 06:49:00	1.158
2015-12-13 06:50:00	0.776
2015-12-13 06:51:00	0.963
2015-12-13 06:52:00	1.02
2015-12-13 06:53:00	0.741
2015-12-13 06:54:00	0.851
2015-12-13 06:55:00	0.943
2015-12-13 06:56:00	0.748
2015-12-13 06:57:00	0.814
2015-12-13 06:58:00	0.896
2015-12-13 06:59:00	0.843
2015-12-13 07:00:00	0.629
2015-12-13 07:01:00	1.103
2015-12-13 07:02:00	1.084
2015-12-13 07:03:00	0.862
2015-12-13 07:04:00	1.078
2015-12-13 07:05:00	1.015
2015-12-13 07:06:00	0.64
2015-12-13 07:07:00	1.094
2015-12-13 07:08:00	0.623
2015-12-13 07:09:00	0.584
2015-12-13 07:10:00	0.937
2015-12-13 07:11:00	0.428
2015-12-13 07:12:00	0.893
2015-12-13 07:13:00	0.529
2015-12-13 07:14:00	0.814
2015-12-13 07:15:00	0.696
2015-12-13 07:16:00	0.582
2015-12-13 07:17:00	0.859
2015-12-13 07:18:00	0.536
2015-12-13 07:19:00	0.839
2015-12-13 07:20:00	0.657
2015-12-13 07:21:00	0.815
2015-12-13 07:22:00	0.602
2015-12-13 07:23:00	0.758
2015-12-13 07:24:00	0.804
2015-12-13 07:25:00	0.576
2015-12-13 07:26:00	0.875
2015-12-13 07:27:00	0.506
2015-12-13 07:28:00	0.933
2015-12-13 07:29:00	0.608
2015-12-13 07:30:00	0.897
2015-12-13 07:31:00	0.544
2015-12-13 07:32:00	0.857
2015-12-13 07:33:00	0.658
2015-12-13 07:34:00	0.874
2015-12-13 07:35:00	0.599
2015-12-13 07:36:00	0.951
2015-12-13 07:37:00	0.729
2015-12-13 07:38:00	0.932
2015-12-13 07:39:00	0.509
2015-12-13 07:40:00	0.978
2015-12-13 07:41:00	0.553
2015-12-13 07:42:00	1.007
2015-12-13 07:43:00	0.569
2015-12-13 07:44:00	0.915
2015-12-13 07:45:00	0.672
2015-12-13 07:46:00	0.72
2015-12-13 07:47:00	0.851
2015-12-13 07:48:00	0.671
2015-12-13 07:49:00	0.909
2015-12-13 07:50:00	0.631
2015-12-13 07:51:00	0.939
2015-12-13 07:52:00	0.551
2015-12-13 07:53:00	0.856
2015-12-13 07:54:00	0.543
2015-12-13 07:55:00	0.873
2015-12-13 07:56:00	0.464
2015-12-13 07:57:00	0.818
2015-12-13 07:58:00	0.526
2015-12-13 07:59:00	0.874
2015-12-13 08:00:00	0.645
2015-12-13 08:01:00	0.782
2015-12-13 08:02:00	0.645
2015-12-13 08:03:00	0.813
2015-12-13 08:04:00	0.856
2015-12-13 08:05:00	0.619
2015-12-13 08:06:00	0.97
2015-12-13 08:07:00	0.442
2015-12-13 08:08:00	1.017
2015-12-13 08:09:00	0.679
2015-12-13 08:10:00	1.002
2015-12-13 08:11:00	0.974
2015-12-13 08:12:00	1.162
2015-12-13 08:13:00	1.397
2015-12-13 08:14:00	1.364
2015-12-13 08:15:00	1.48
2015-12-13 08:16:00	1.7
2015-12-13 08:17:00	1.342
2015-12-13 08:18:00	1.447
2015-12-13 08:19:00	1.17
2015-12-13 08:20:00	1.285
2015-12-13 08:21:00	1.213
2015-12-13 08:22:00	1.012
2015-12-13 08:23:00	1.363
2015-12-13 08:24:00	0.788
2015-12-13 08:25:00	1.166
2015-12-13 08:26:00	0.932
2015-12-13 08:27:00	0.864
2015-12-13 08:28:00	0.822
2015-12-13 08:29:00	0.908
2015-12-13 08:30:00	0.92
2015-12-13 08:31:00	0.612
2015-12-13 08:32:00	0.928
2015-12-13 08:33:00	0.705
2015-12-13 08:34:00	0.66
2015-12-13 08:35:00	0.658
2015-12-13 08:36:00	0.768
2015-12-13 08:37:00	0.834
2015-12-13 08:38:00	0.599
2015-12-13 08:39:00	0.88
2015-12-13 08:40:00	0.566
2015-12-13 08:41:00	0.571
2015-12-13 08:42:00	0.868
2015-12-13 08:43:00	0.514
2015-12-13 08:44:00	0.99
2015-12-13 08:45:00	0.665
2015-12-13 08:46:00	0.671
2015-12-13 08:47:00	0.789
2015-12-13 08:48:00	0.479
2015-12-13 08:49:00	0.859
2015-12-13 08:50:00	0.755
2015-12-13 08:51:00	0.44
2015-12-13 08:52:00	0.922
2015-12-13 08:53:00	0.542
2015-12-13 08:54:00	0.731
2015-12-13 08:55:00	0.813
2015-12-13 08:56:00	0.628
2015-12-13 08:57:00	0.486
2015-12-13 08:58:00	0.875
2015-12-13 08:59:00	0.783
2015-12-13 09:00:00	0.469
2015-12-13 09:01:00	0.812
2015-12-13 09:02:00	0.835
2015-12-13 09:03:00	0.712
2015-12-13 09:04:00	0.571
2015-12-13 09:05:00	0.672
2015-12-13 09:06:00	0.825
2015-12-13 09:07:00	0.797
2015-12-13 09:08:00	0.672
2015-12-13 09:09:00	0.648
2015-12-13 09:10:00	0.76
2015-12-13 09:11:00	0.78
2015-12-13 09:12:00	0.895
2015-12-13 09:13:00	0.644
2015-12-13 09:14:00	0.878
2015-12-13 09:15:00	0.711
2015-12-13 09:16:00	0.645
2015-12-13 09:17:00	0.697
2015-12-13 09:18:00	0.828
2015-12-13 09:19:00	0.593
2015-12-13 09:20:00	0.732
2015-12-13 09:21:00	0.946
2015-12-13 09:22:00	0.774
2015-12-13 09:23:00	0.575
2015-12-13 09:24:00	0.78
2015-12-13 09:25:00	0.819
2015-12-13 09:26:00	0.713
2015-12-13 09:27:00	0.656
2015-12-13 09:28:00	0.724
2015-12-13 09:29:00	0.659
2015-12-13 09:30:00	0.654
2015-12-13 09:31:00	0.622
2015-12-13 09:32:00	0.749
2015-12-13 09:33:00	0.686
2015-12-13 09:34:00	0.782
2015-12-13 09:35:00	0.824
2015-12-13 09:36:00	0.734
2015-12-13 09:37:00	0.541
2015-12-13 09:38:00	0.583
2015-12-13 09:39:00	0.707
2015-12-13 09:40:00	0.778
2015-12-13 09:41:00	0.744
2015-12-13 09:42:00	0.725
2015-12-13 09:43:00	0.65
2015-12-13 09:44:00	0.724
2015-12-13 09:45:00	0.812
2015-12-13 09:46:00	0.577
2015-12-13 09:47:00	0.729
2015-12-13 09:48:00	0.737
2015-12-13 09:49:00	0.621
2015-12-13 09:50:00	0.863
2015-12-13 09:51:00	0.459
2015-12-13 09:52:00	0.992
2015-12-13 09:53:00	0.542
2015-12-13 09:54:00	0.992
2015-12-13 09:55:00	0.697
2015-12-13 09:56:00	0.579
2015-12-13 09:57:00	1.175
2015-12-13 09:58:00	0.792
2015-12-13 09:59:00	0.92
2015-12-13 10:00:00	0.633
2015-12-13 10:01:00	0.935
2015-12-13 10:02:00	1.012
2015-12-13 10:03:00	0.689
2015-12-13 10:04:00	0.824
2015-12-13 10:05:00	0.913
2015-12-13 10:06:00	0.884
2015-12-13 10:07:00	0.902
2015-12-13 10:08:00	0.718
2015-12-13 10:09:00	0.88
2015-12-13 10:10:00	1.07
2015-12-13 10:11:00	0.85
2015-12-13 10:12:00	0.858
2015-12-13 10:13:00	0.742
2015-12-13 10:14:00	0.7
2015-12-13 10:15:00	0.911
2015-12-13 10:16:00	0.935
2015-12-13 10:17:00	0.584
2015-12-13 10:18:00	0.877
2015-12-13 10:19:00	0.863
2015-12-13 10:20:00	0.719
2015-12-13 10:21:00	0.896
2015-12-13 10:22:00	0.703
2015-12-13 10:23:00	0.705
2015-12-13 10:24:00	0.836
2015-12-13 10:25:00	0.878
2015-12-13 10:26:00	1.037
2015-12-13 10:27:00	0.702
2015-12-13 10:28:00	0.863
2015-12-13 10:29:00	0.726
2015-12-13 10:30:00	0.792
2015-12-13 10:31:00	0.738
2015-12-13 10:32:00	0.689
2015-12-13 10:33:00	0.628
2015-12-13 10:34:00	0.735
2015-12-13 10:35:00	0.689
2015-12-13 10:36:00	0.653
2015-12-13 10:37:00	0.682
2015-12-13 10:38:00	0.701
2015-12-13 10:39:00	0.695
2015-12-13 10:40:00	0.595
2015-12-13 10:41:00	0.626
2015-12-13 10:42:00	0.633
2015-12-13 10:43:00	0.748
2015-12-13 10:44:00	0.606
2015-12-13 10:45:00	0.562
2015-12-13 10:46:00	0.715
2015-12-13 10:47:00	0.601
2015-12-13 10:48:00	0.776
2015-12-13 10:49:00	0.53
2015-12-13 10:50:00	0.528
2015-12-13 10:51:00	0.624
2015-12-13 10:52:00	0.73
2015-12-13 10:53:00	0.562
2015-12-13 10:54:00	0.624
2015-12-13 10:55:00	0.556
2015-12-13 10:56:00	0.715
2015-12-13 10:57:00	0.337
2015-12-13 10:58:00	0.717
2015-12-13 10:59:00	0.53
2015-12-13 11:00:00	0.723
2015-12-13 11:01:00	0.583
2015-12-13 11:02:00	0.575
2015-12-13 11:03:00	0.553
2015-12-13 11:04:00	0.6
2015-12-13 11:05:00	0.527
2015-12-13 11:06:00	0.602
2015-12-13 11:07:00	0.677
2015-12-13 11:08:00	0.512
2015-12-13 11:09:00	0.579
2015-12-13 11:10:00	0.473
2015-12-13 11:11:00	0.502
2015-12-13 11:12:00	0.623
2015-12-13 11:13:00	0.546
2015-12-13 11:14:00	0.567
2015-12-13 11:15:00	0.585
2015-12-13 11:16:00	0.444
2015-12-13 11:17:00	0.543
2015-12-13 11:18:00	0.564
2015-12-13 11:19:00	0.528
2015-12-13 11:20:00	0.464
2015-12-13 11:21:00	0.461
2015-12-13 11:22:00	0.489
2015-12-13 11:23:00	0.53
2015-12-13 11:24:00	0.515
2015-12-13 11:25:00	0.475
2015-12-13 11:26:00	0.483
2015-12-13 11:27:00	0.588
2015-12-13 11:28:00	0.377
2015-12-13 11:29:00	0.52
2015-12-13 11:30:00	0.479
2015-12-13 11:31:00	0.507
2015-12-13 11:32:00	0.506
2015-12-13 11:33:00	0.465
2015-12-13 11:34:00	0.477
2015-12-13 11:35:00	0.492
2015-12-13 11:36:00	0.568
2015-12-13 11:37:00	0.454
2015-12-13 11:38:00	0.537
2015-12-13 11:39:00	0.537
2015-12-13 11:40:00	0.503
2015-12-13 11:41:00	0.527
2015-12-13 11:42:00	0.417
2015-12-13 11:43:00	0.576
2015-12-13 11:44:00	0.537
2015-12-13 11:45:00	0.514
2015-12-13 11:46:00	0.483
2015-12-13 11:47:00	0.542
2015-12-13 11:48:00	0.457
2015-12-13 11:49:00	0.541
2015-12-13 11:50:00	0.559
2015-12-13 11:51:00	0.447
2015-12-13 11:52:00	0.527
2015-12-13 11:53:00	0.56
2015-12-13 11:54:00	0.496
2015-12-13 11:55:00	0.595
2015-12-13 11:56:00	0.51
2015-12-13 11:57:00	0.474
2015-12-13 11:58:00	0.453
2015-12-13 11:59:00	0.511
2015-12-13 12:00:00	0.508
2015-12-13 12:01:00	0.582
2015-12-13 12:02:00	0.555
2015-12-13 12:03:00	0.478
2015-12-13 12:04:00	0.471
2015-12-13 12:05:00	0.53
2015-12-13 12:06:00	0.598
2015-12-13 12:07:00	0.602
2015-12-13 12:08:00	0.534
2015-12-13 12:09:00	0.627
2015-12-13 12:10:00	0.422
2015-12-13 12:11:00	0.502
2015-12-13 12:12:00	0.742
2015-12-13 12:13:00	0.565
2015-12-13 12:14:00	0.574
2015-12-13 12:15:00	0.699
2015-12-13 12:16:00	0.618
2015-12-13 12:17:00	0.648
2015-12-13 12:18:00	0.712
2015-12-13 12:19:00	0.617
2015-12-13 12:20:00	0.588
2015-12-13 12:21:00	0.715
2015-12-13 12:22:00	0.557
2015-12-13 12:23:00	0.72
2015-12-13 12:24:00	0.616
2015-12-13 12:25:00	0.626
2015-12-13 12:26:00	0.728
2015-12-13 12:27:00	0.475
2015-12-13 12:28:00	0.685
2015-12-13 12:29:00	0.726
2015-12-13 12:30:00	0.535
2015-12-13 12:31:00	0.606
2015-12-13 12:32:00	0.645
2015-12-13 12:33:00	0.549
2015-12-13 12:34:00	0.565
2015-12-13 12:35:00	0.502
2015-12-13 12:36:00	0.656
2015-12-13 12:37:00	0.639
2015-12-13 12:38:00	0.504
2015-12-13 12:39:00	0.662
2015-12-13 12:40:00	0.474
2015-12-13 12:41:00	0.665
2015-12-13 12:42:00	0.586
2015-12-13 12:43:00	0.521
2015-12-13 12:44:00	0.584
2015-12-13 12:45:00	0.583
2015-12-13 12:46:00	0.758
2015-12-13 12:47:00	0.469
2015-12-13 12:48:00	0.633
2015-12-13 12:49:00	0.483
2015-12-13 12:50:00	0.626
2015-12-13 12:51:00	0.478
2015-12-13 12:52:00	0.652
2015-12-13 12:53:00	0.711
2015-12-13 12:54:00	0.644
2015-12-13 12:55:00	0.576
2015-12-13 12:56:00	0.667
2015-12-13 12:57:00	0.69
2015-12-13 12:58:00	0.715
2015-12-13 12:59:00	0.674
2015-12-13 13:00:00	0.749
2015-12-13 13:01:00	0.699
2015-12-13 13:02:00	0.623
2015-12-13 13:03:00	0.587
2015-12-13 13:04:00	0.639
2015-12-13 13:05:00	0.659
2015-12-13 13:06:00	0.425
2015-12-13 13:07:00	0.569
2015-12-13 13:08:00	0.479
2015-12-13 13:09:00	0.598
2015-12-13 13:10:00	0.392
2015-12-13 13:11:00	0.493
2015-12-13 13:12:00	0.45
2015-12-13 13:13:00	0.684
2015-12-13 13:14:00	0.49
2015-12-13 13:15:00	0.587
2015-12-13 13:16:00	0.407
2015-12-13 13:17:00	0.589
2015-12-13 13:18:00	0.578
2015-12-13 13:19:00	0.571
2015-12-13 13:20:00	0.504
2015-12-13 13:21:00	0.472
2015-12-13 13:22:00	0.529
2015-12-13 13:23:00	0.556
2015-12-13 13:24:00	0.301
2015-12-13 13:25:00	0.664
2015-12-13 13:26:00	0.522
2015-12-13 13:27:00	0.6
2015-12-13 13:28:00	0.415
2015-12-13 13:29:00	0.463
2015-12-13 13:30:00	0.441
2015-12-13 13:31:00	0.601
2015-12-13 13:32:00	0.496
2015-12-13 13:33:00	0.497
2015-12-13 13:34:00	0.506
2015-12-13 13:35:00	0.633
2015-12-13 13:36:00	0.454
2015-12-13 13:37:00	0.526
2015-12-13 13:38:00	0.612
2015-12-13 13:39:00	0.518
2015-12-13 13:40:00	0.467
2015-12-13 13:41:00	0.431
2015-12-13 13:42:00	0.588
2015-12-13 13:43:00	0.61
2015-12-13 13:44:00	0.394
2015-12-13 13:45:00	0.591
2015-12-13 13:46:00	0.495
2015-12-13 13:47:00	0.597
2015-12-13 13:48:00	0.573
2015-12-13 13:49:00	0.433
2015-12-13 13:50:00	0.604
2015-12-13 13:51:00	0.593
2015-12-13 13:52:00	0.687
2015-12-13 13:53:00	0.658
2015-12-13 13:54:00	0.597
2015-12-13 13:55:00	0.646
2015-12-13 13:56:00	0.664
2015-12-13 13:57:00	0.732
2015-12-13 13:58:00	0.848
2015-12-13 13:59:00	0.631
2015-12-13 14:00:00	0.679
2015-12-13 14:01:00	0.679
2015-12-13 14:02:00	0.652
2015-12-13 14:03:00	0.751
2015-12-13 14:04:00	0.775
2015-12-13 14:05:00	0.693
2015-12-13 14:06:00	0.751
2015-12-13 14:07:00	0.779
2015-12-13 14:08:00	0.752
2015-12-13 14:09:00	0.664
2015-12-13 14:10:00	0.7
2015-12-13 14:11:00	0.748
2015-12-13 14:12:00	0.624
2015-12-13 14:13:00	0.796
2015-12-13 14:14:00	0.712
2015-12-13 14:15:00	0.831
2015-12-13 14:16:00	0.757
2015-12-13 14:17:00	0.8
2015-12-13 14:18:00	0.709
2015-12-13 14:19:00	0.825
2015-12-13 14:20:00	0.713
2015-12-13 14:21:00	0.927
2015-12-13 14:22:00	0.941
2015-12-13 14:23:00	0.963
2015-12-13 14:24:00	0.957
2015-12-13 14:25:00	0.969
2015-12-13 14:26:00	0.872
2015-12-13 14:27:00	0.7
2015-12-13 14:28:00	0.825
2015-12-13 14:29:00	0.842
2015-12-13 14:30:00	0.627
2015-12-13 14:31:00	0.695
2015-12-13 14:32:00	0.747
2015-12-13 14:33:00	0.778
2015-12-13 14:34:00	0.62
2015-12-13 14:35:00	0.699
2015-12-13 14:36:00	0.73
2015-12-13 14:37:00	0.673
2015-12-13 14:38:00	0.706
2015-12-13 14:39:00	0.636
2015-12-13 14:40:00	0.654
2015-12-13 14:41:00	0.598
2015-12-13 14:42:00	0.705
2015-12-13 14:43:00	0.888
2015-12-13 14:44:00	0.956
2015-12-13 14:45:00	1.277
2015-12-13 14:46:00	1.014
2015-12-13 14:47:00	0.908
2015-12-13 14:48:00	0.924
2015-12-13 14:49:00	0.868
2015-12-13 14:50:00	1.026
2015-12-13 14:51:00	1.229
2015-12-13 14:52:00	1.276
2015-12-13 14:53:00	1.405
2015-12-13 14:54:00	1.304
2015-12-13 14:55:00	1.506
2015-12-13 14:56:00	1.458
2015-12-13 14:57:00	1.392
2015-12-13 14:58:00	1.368
2015-12-13 14:59:00	1.478
2015-12-13 15:00:00	1.41
2015-12-13 15:01:00	1.203
2015-12-13 15:02:00	1.191
2015-12-13 15:03:00	1.034
2015-12-13 15:04:00	1.143
2015-12-13 15:05:00	1.072
2015-12-13 15:06:00	1.133
2015-12-13 15:07:00	1.1
2015-12-13 15:08:00	1.122
2015-12-13 15:09:00	1.079
2015-12-13 15:10:00	1.156
2015-12-13 15:11:00	1.042
2015-12-13 15:12:00	1.213
2015-12-13 15:13:00	1.177
2015-12-13 15:14:00	1.264
2015-12-13 15:15:00	1.067
2015-12-13 15:16:00	1.121
2015-12-13 15:17:00	1.141
2015-12-13 15:18:00	1.171
2015-12-13 15:19:00	1.216
2015-12-13 15:20:00	1.422
2015-12-13 15:21:00	1.219
2015-12-13 15:22:00	1.192
2015-12-13 15:23:00	1.415
2015-12-13 15:24:00	1.245
2015-12-13 15:25:00	1.132
2015-12-13 15:26:00	1.265
2015-12-13 15:27:00	1.306
2015-12-13 15:28:00	1.286
2015-12-13 15:29:00	1.234
2015-12-13 15:30:00	1.32
2015-12-13 15:31:00	1.355
2015-12-13 15:32:00	1.237
2015-12-13 15:33:00	1.448
2015-12-13 15:34:00	1.244
2015-12-13 15:35:00	1.355
2015-12-13 15:36:00	1.211
2015-12-13 15:37:00	1.303
2015-12-13 15:38:00	1.272
2015-12-13 15:39:00	1.161
2015-12-13 15:40:00	1.149
2015-12-13 15:41:00	1.256
2015-12-13 15:42:00	1.146
2015-12-13 15:43:00	1.138
2015-12-13 15:44:00	1.176
2015-12-13 15:45:00	1.07
2015-12-13 15:46:00	1.17
2015-12-13 15:47:00	1.125
2015-12-13 15:48:00	1.025
2015-12-13 15:49:00	1.066
2015-12-13 15:50:00	0.934
2015-12-13 15:51:00	1.049
2015-12-13 15:52:00	1.055
2015-12-13 15:53:00	1.009
2015-12-13 15:54:00	1.038
2015-12-13 15:55:00	1.055
2015-12-13 15:56:00	1.16
2015-12-13 15:57:00	1.42
2015-12-13 15:58:00	1.122
2015-12-13 15:59:00	1.113
2015-12-13 16:00:00	1.581
2015-12-13 16:01:00	1.903
2015-12-13 16:02:00	1.657
2015-12-13 16:03:00	1.6
2015-12-13 16:04:00	1.584
2015-12-13 16:05:00	1.743
2015-12-13 16:06:00	2.577
2015-12-13 16:07:00	2.56
2015-12-13 16:08:00	2.253
2015-12-13 16:09:00	2.302
2015-12-13 16:10:00	2.221
2015-12-13 16:11:00	2.241
2015-12-13 16:12:00	2.153
2015-12-13 16:13:00	2.096
2015-12-13 16:14:00	1.994
2015-12-13 16:15:00	2.105
2015-12-13 16:16:00	1.808
2015-12-13 16:17:00	1.918
2015-12-13 16:18:00	1.879
2015-12-13 16:19:00	1.91
2015-12-13 16:20:00	1.975
2015-12-13 16:21:00	2.064
2015-12-13 16:22:00	1.924
2015-12-13 16:23:00	2.04
2015-12-13 16:24:00	2.065
2015-12-13 16:25:00	2.049
2015-12-13 16:26:00	1.88
2015-12-13 16:27:00	1.919
2015-12-13 16:28:00	1.815
2015-12-13 16:29:00	1.669
2015-12-13 16:30:00	1.806
2015-12-13 16:31:00	1.733
2015-12-13 16:32:00	1.952
2015-12-13 16:33:00	1.614
2015-12-13 16:34:00	1.563
2015-12-13 16:35:00	1.775
2015-12-13 16:36:00	1.609
2015-12-13 16:37:00	1.667
2015-12-13 16:38:00	1.384
2015-12-13 16:39:00	1.468
2015-12-13 16:40:00	1.54
2015-12-13 16:41:00	1.585
2015-12-13 16:42:00	1.528
2015-12-13 16:43:00	1.617
2015-12-13 16:44:00	1.786
2015-12-13 16:45:00	1.58
2015-12-13 16:46:00	1.578
2015-12-13 16:47:00	1.555
2015-12-13 16:48:00	1.621
2015-12-13 16:49:00	1.48
2015-12-13 16:50:00	1.502
2015-12-13 16:51:00	1.38
2015-12-13 16:52:00	1.376
2015-12-13 16:53:00	1.541
2015-12-13 16:54:00	1.658
2015-12-13 16:55:00	1.729
2015-12-13 16:56:00	1.792
2015-12-13 16:57:00	1.989
2015-12-13 16:58:00	2.003
2015-12-13 16:59:00	1.971
2015-12-13 17:00:00	2.008
2015-12-13 17:01:00	2.08
2015-12-13 17:02:00	2.24
2015-12-13 17:03:00	2.305
2015-12-13 17:04:00	2.387
2015-12-13 17:05:00	2.296
2015-12-13 17:06:00	2.184
2015-12-13 17:07:00	2.314
2015-12-13 17:08:00	2.19
2015-12-13 17:09:00	2.303
2015-12-13 17:10:00	2.083
2015-12-13 17:11:00	2.377
2015-12-13 17:12:00	2.176
2015-12-13 17:13:00	2.106
2015-12-13 17:14:00	2.081
2015-12-13 17:15:00	2.128
2015-12-13 17:16:00	2.116
2015-12-13 17:17:00	2.228
2015-12-13 17:18:00	2.146
2015-12-13 17:19:00	2.366
2015-12-13 17:20:00	2.275
2015-12-13 17:21:00	2.275
2015-12-13 17:22:00	2.379
2015-12-13 17:23:00	2.306
2015-12-13 17:24:00	1.929
2015-12-13 17:25:00	1.796
2015-12-13 17:26:00	1.732
2015-12-13 17:27:00	1.984
2015-12-13 17:28:00	1.94
2015-12-13 17:29:00	1.863
2015-12-13 17:30:00	1.834
2015-12-13 17:31:00	1.777
2015-12-13 17:32:00	1.618
2015-12-13 17:33:00	1.208
2015-12-13 17:34:00	1.029
2015-12-13 17:35:00	1.117
2015-12-13 17:36:00	0.938
2015-12-13 17:37:00	0.89
2015-12-13 17:38:00	0.776
2015-12-13 17:39:00	0.77
2015-12-13 17:40:00	0.744
2015-12-13 17:41:00	0.784
2015-12-13 17:42:00	0.825
2015-12-13 17:43:00	0.798
2015-12-13 17:44:00	1.013
2015-12-13 17:45:00	0.866
2015-12-13 17:46:00	0.972
2015-12-13 17:47:00	1.035
2015-12-13 17:48:00	0.872
2015-12-13 17:49:00	1.021
2015-12-13 17:50:00	0.954
2015-12-13 17:51:00	0.779
2015-12-13 17:52:00	1.022
2015-12-13 17:53:00	1.123
2015-12-13 17:54:00	0.909
2015-12-13 17:55:00	0.793
2015-12-13 17:56:00	0.768
2015-12-13 17:57:00	1.177
2015-12-13 17:58:00	1.18
2015-12-13 17:59:00	1.058
2015-12-13 18:00:00	1.126
2015-12-13 18:01:00	0.944
2015-12-13 18:02:00	0.891
2015-12-13 18:03:00	0.837
2015-12-13 18:04:00	0.768
2015-12-13 18:05:00	0.653
2015-12-13 18:06:00	0.696
2015-12-13 18:07:00	0.947
2015-12-13 18:08:00	0.712
2015-12-13 18:09:00	0.67
2015-12-13 18:10:00	0.607
2015-12-13 18:11:00	0.94
2015-12-13 18:12:00	0.769
2015-12-13 18:13:00	1.088
2015-12-13 18:14:00	1.222
2015-12-13 18:15:00	1.471
2015-12-13 18:16:00	1.397
2015-12-13 18:17:00	1.425
2015-12-13 18:18:00	1.714
2015-12-13 18:19:00	1.465
2015-12-13 18:20:00	1.656
2015-12-13 18:21:00	1.362
2015-12-13 18:22:00	1.417
2015-12-13 18:23:00	1.308
2015-12-13 18:24:00	1.332
2015-12-13 18:25:00	1.272
2015-12-13 18:26:00	1.424
2015-12-13 18:27:00	1.351
2015-12-13 18:28:00	1.376
2015-12-13 18:29:00	1.428
2015-12-13 18:30:00	1.44
2015-12-13 18:31:00	1.606
2015-12-13 18:32:00	1.501
2015-12-13 18:33:00	1.611
2015-12-13 18:34:00	1.502
2015-12-13 18:35:00	1.44
2015-12-13 18:36:00	1.625
2015-12-13 18:37:00	1.695
2015-12-13 18:38:00	1.592
2015-12-13 18:39:00	1.708
2015-12-13 18:40:00	1.756
2015-12-13 18:41:00	1.652
2015-12-13 18:42:00	1.894
2015-12-13 18:43:00	2.417
2015-12-13 18:44:00	2.748
2015-12-13 18:45:00	2.749
2015-12-13 18:46:00	2.566
2015-12-13 18:47:00	2.345
2015-12-13 18:48:00	2.174
2015-12-13 18:49:00	2.285
2015-12-13 18:50:00	2.23
2015-12-13 18:51:00	1.913
2015-12-13 18:52:00	1.952
2015-12-13 18:53:00	1.56
2015-12-13 18:54:00	1.537
2015-12-13 18:55:00	1.628
2015-12-13 18:56:00	1.438
2015-12-13 18:57:00	1.148
2015-12-13 18:58:00	1.205
2015-12-13 18:59:00	1.393
2015-12-13 19:00:00	1.645
2015-12-13 19:01:00	1.188
2015-12-13 19:02:00	1.325
2015-12-13 19:03:00	1.112
2015-12-13 19:04:00	1.519
2015-12-13 19:05:00	1.69
2015-12-13 19:06:00	1.588
2015-12-13 19:07:00	1.587
2015-12-13 19:08:00	1.364
2015-12-13 19:09:00	1.229
2015-12-13 19:10:00	0.909
2015-12-13 19:11:00	1.205
2015-12-13 19:12:00	1.191
2015-12-13 19:13:00	1.224
2015-12-13 19:14:00	1.54
2015-12-13 19:15:00	1.461
2015-12-13 19:16:00	1.353
2015-12-13 19:17:00	1.512
2015-12-13 19:18:00	1.3
2015-12-13 19:19:00	1.663
2015-12-13 19:20:00	1.27
2015-12-13 19:21:00	1.578
2015-12-13 19:22:00	1.208
2015-12-13 19:23:00	1.248
2015-12-13 19:24:00	0.98
2015-12-13 19:25:00	1.193
2015-12-13 19:26:00	0.8
2015-12-13 19:27:00	1.034
2015-12-13 19:28:00	1.113
2015-12-13 19:29:00	1.293
2015-12-13 19:30:00	1.042
2015-12-13 19:31:00	1.353
2015-12-13 19:32:00	1.349
2015-12-13 19:33:00	1.044
2015-12-13 19:34:00	1.195
2015-12-13 19:35:00	1.25
2015-12-13 19:36:00	0.953
2015-12-13 19:37:00	1.336
2015-12-13 19:38:00	1.153
2015-12-13 19:39:00	1.121
2015-12-13 19:40:00	1.136
2015-12-13 19:41:00	1.325
2015-12-13 19:42:00	1.257
2015-12-13 19:43:00	1.282
2015-12-13 19:44:00	1.209
2015-12-13 19:45:00	1.292
2015-12-13 19:46:00	1.188
2015-12-13 19:47:00	1.08
2015-12-13 19:48:00	1.114
2015-12-13 19:49:00	1.214
2015-12-13 19:50:00	1.177
2015-12-13 19:51:00	0.944
2015-12-13 19:52:00	1.223
2015-12-13 19:53:00	1.237
2015-12-13 19:54:00	1.123
2015-12-13 19:55:00	1.096
2015-12-13 19:56:00	0.937
2015-12-13 19:57:00	0.955
2015-12-13 19:58:00	1.123
2015-12-13 19:59:00	1.226
2015-12-13 20:00:00	1.299
2015-12-13 20:01:00	1.187
2015-12-13 20:02:00	1.236
2015-12-13 20:03:00	1.236
2015-12-13 20:04:00	1.318
2015-12-13 20:05:00	1.038
2015-12-13 20:06:00	1.295
2015-12-13 20:07:00	1.315
2015-12-13 20:08:00	1.437
2015-12-13 20:09:00	1.232
2015-12-13 20:10:00	1.117
2015-12-13 20:11:00	1.101
2015-12-13 20:12:00	1.044
2015-12-13 20:13:00	1.083
2015-12-13 20:14:00	1.15
2015-12-13 20:15:00	1.016
2015-12-13 20:16:00	1.163
2015-12-13 20:17:00	1.141
2015-12-13 20:18:00	0.986
2015-12-13 20:19:00	0.992
2015-12-13 20:20:00	1.183
2015-12-13 20:21:00	1.077
2015-12-13 20:22:00	1.351
2015-12-13 20:23:00	1.205
2015-12-13 20:24:00	1.193
2015-12-13 20:25:00	1.286
2015-12-13 20:26:00	1.261
2015-12-13 20:27:00	0.994
2015-12-13 20:28:00	1.117
2015-12-13 20:29:00	1.006
2015-12-13 20:30:00	1.294
2015-12-13 20:31:00	1.096
2015-12-13 20:32:00	1.322
2015-12-13 20:33:00	1.255
2015-12-13 20:34:00	1.234
2015-12-13 20:35:00	1.187
2015-12-13 20:36:00	0.963
2015-12-13 20:37:00	1.414
2015-12-13 20:38:00	1.144
2015-12-13 20:39:00	1.313
2015-12-13 20:40:00	1.556
2015-12-13 20:41:00	1.445
2015-12-13 20:42:00	1.451
2015-12-13 20:43:00	1.24
2015-12-13 20:44:00	1.479
2015-12-13 20:45:00	1.33
2015-12-13 20:46:00	1.704
2015-12-13 20:47:00	1.717
2015-12-13 20:48:00	1.757
2015-12-13 20:49:00	1.535
2015-12-13 20:50:00	1.535
2015-12-13 20:51:00	1.656
2015-12-13 20:52:00	1.561
2015-12-13 20:53:00	1.512
2015-12-13 20:54:00	1.337
2015-12-13 20:55:00	1.428
2015-12-13 20:56:00	1.486
2015-12-13 20:57:00	1.415
2015-12-13 20:58:00	1.354
2015-12-13 20:59:00	1.478
2015-12-13 21:00:00	1.481
2015-12-13 21:01:00	1.52
2015-12-13 21:02:00	1.503
2015-12-13 21:03:00	1.486
2015-12-13 21:04:00	1.478
2015-12-13 21:05:00	1.607
2015-12-13 21:06:00	1.527
2015-12-13 21:07:00	1.286
2015-12-13 21:08:00	1.396
2015-12-13 21:09:00	1.545
2015-12-13 21:10:00	1.434
2015-12-13 21:11:00	1.669
2015-12-13 21:12:00	1.453
2015-12-13 21:13:00	1.372
2015-12-13 21:14:00	1.563
2015-12-13 21:15:00	1.461
2015-12-13 21:16:00	1.532
2015-12-13 21:17:00	1.601
2015-12-13 21:18:00	1.59
2015-12-13 21:19:00	1.968
2015-12-13 21:20:00	1.948
2015-12-13 21:21:00	1.72
2015-12-13 21:22:00	1.55
2015-12-13 21:23:00	1.722
2015-12-13 21:24:00	1.295
2015-12-13 21:25:00	1.621
2015-12-13 21:26:00	1.509
2015-12-13 21:27:00	1.568
2015-12-13 21:28:00	1.592
2015-12-13 21:29:00	1.607
2015-12-13 21:30:00	1.571
2015-12-13 21:31:00	1.728
2015-12-13 21:32:00	1.911
2015-12-13 21:33:00	1.688
2015-12-13 21:34:00	1.946
2015-12-13 21:35:00	1.655
2015-12-13 21:36:00	1.623
2015-12-13 21:37:00	1.618
2015-12-13 21:38:00	1.475
2015-12-13 21:39:00	1.337
2015-12-13 21:40:00	1.462
2015-12-13 21:41:00	1.565
2015-12-13 21:42:00	1.166
2015-12-13 21:43:00	1.461
2015-12-13 21:44:00	1.603
2015-12-13 21:45:00	1.363
2015-12-13 21:46:00	1.332
2015-12-13 21:47:00	1.302
2015-12-13 21:48:00	1.3
2015-12-13 21:49:00	1.396
2015-12-13 21:50:00	1.401
2015-12-13 21:51:00	1.413
2015-12-13 21:52:00	1.24
2015-12-13 21:53:00	1.558
2015-12-13 21:54:00	1.513
2015-12-13 21:55:00	1.24
2015-12-13 21:56:00
2015-12-13 21:57:00
2015-12-13 21:58:00
2015-12-13 21:59:00
2015-12-13 22:00:00
2015-12-13 22:01:00	1.434
2015-12-13 22:02:00	1.573
2015-12-13 22:03:00	1.696
2015-12-13 22:04:00	1.705
2015-12-13 22:05:00	1.814
2015-12-13 22:06:00	1.661
2015-12-13 22:07:00	1.654
2015-12-13 22:08:00	1.822
2015-12-13 22:09:00	1.767
2015-12-13 22:10:00	1.96
2015-12-13 22:11:00	1.956
2015-12-13 22:12:00	1.904
2015-12-13 22:13:00	2.094
2015-12-13 22:14:00	2.033
2015-12-13 22:15:00	2.042
2015-12-13 22:16:00	1.978
2015-12-13 22:17:00	2.264
2015-12-13 22:18:00	2.032
2015-12-13 22:19:00	2.419
2015-12-13 22:20:00	2.404
2015-12-13 22:21:00	2.41
2015-12-13 22:22:00	2.618
2015-12-13 22:23:00	2.697
2015-12-13 22:24:00	2.865
2015-12-13 22:25:00	2.664
2015-12-13 22:26:00	2.595
2015-12-13 22:27:00	2.795
2015-12-13 22:28:00	2.603
2015-12-13 22:29:00	2.764
2015-12-13 22:30:00	2.591
2015-12-13 22:31:00	2.688
2015-12-13 22:32:00	2.606
2015-12-13 22:33:00	2.375
2015-12-13 22:34:00	2.372
2015-12-13 22:35:00	1.866
2015-12-13 22:36:00	2.122
2015-12-13 22:37:00	1.724
2015-12-13 22:38:00	1.918
2015-12-13 22:39:00	1.796
2015-12-13 22:40:00	1.796
2015-12-13 22:41:00	1.724
2015-12-13 22:42:00	1.669
2015-12-13 22:43:00	1.736
2015-12-13 22:44:00	1.507
2015-12-13 22:45:00	1.744
2015-12-13 22:46:00	1.381
2015-12-13 22:47:00	1.739
2015-12-13 22:48:00	1.59
2015-12-13 22:49:00	1.695
2015-12-13 22:50:00	1.567
2015-12-13 22:51:00	1.545
2015-12-13 22:52:00	1.54
2015-12-13 22:53:00	1.524
2015-12-13 22:54:00	1.496
2015-12-13 22:55:00	1.53
2015-12-13 22:56:00	1.314
2015-12-13 22:57:00	1.51
2015-12-13 22:58:00	1.311
2015-12-13 22:59:00	1.484
2015-12-13 23:00:00	1.174
2015-12-13 23:01:00	1.405
2015-12-13 23:02:00	1.285
2015-12-13 23:03:00	1.332
2015-12-13 23:04:00	1.182
2015-12-13 23:05:00	1.397
2015-12-13 23:06:00	1.347
2015-12-13 23:07:00	1.377
2015-12-13 23:08:00	1.224
2015-12-13 23:09:00	1.384
2015-12-13 23:10:00	1.372
2015-12-13 23:11:00	1.338
2015-12-13 23:12:00	1.208
2015-12-13 23:13:00	1.548
2015-12-13 23:14:00	1.386
2015-12-13 23:15:00	1.404
2015-12-13 23:16:00	1.378
2015-12-13 23:17:00	1.369
2015-12-13 23:18:00	1.391
2015-12-13 23:19:00	1.292
2015-12-13 23:20:00	1.458
2015-12-13 23:21:00	1.407
2015-12-13 23:22:00	1.489
2015-12-13 23:23:00	1.483
2015-12-13 23:24:00	1.25
2015-12-13 23:25:00	1.621
2015-12-13 23:26:00	1.43
2015-12-13 23:27:00	1.393
2015-12-13 23:28:00	1.551
2015-12-13 23:29:00	1.429
2015-12-13 23:30:00	1.38
2015-12-13 23:31:00	1.558
2015-12-13 23:32:00	1.173
2015-12-13 23:33:00	1.498
2015-12-13 23:34:00	1.509
2015-12-13 23:35:00	1.386
2015-12-13 23:36:00	1.426
2015-12-13 23:37:00	1.353
2015-12-13 23:38:00	1.479
2015-12-13 23:39:00	1.435
2015-12-13 23:40:00	1.287
2015-12-13 23:41:00	1.572
2015-12-13 23:42:00	1.367
2015-12-13 23:43:00	1.476
2015-12-13 23:44:00	1.47
2015-12-13 23:45:00	1.285
2015-12-13 23:46:00	1.356
2015-12-13 23:47:00	1.509
2015-12-13 23:48:00	1.361
2015-12-13 23:49:00	1.458
2015-12-13 23:50:00	1.545
2015-12-13 23:51:00	1.366
2015-12-13 23:52:00	1.531
2015-12-13 23:53:00	1.624
2015-12-13 23:54:00	1.815
2015-12-13 23:55:00	1.822
2015-12-13 23:56:00	1.776
2015-12-13 23:57:00	1.76
2015-12-13 23:58:00	1.878
2015-12-13 23:59:00	1.756
2015-12-14	1.623
2015-12-14 00:01:00	1.67
2015-12-14 00:02:00	1.67
2015-12-14 00:03:00	1.65
2015-12-14 00:04:00	1.546
2015-12-14 00:05:00	1.656
2015-12-14 00:06:00	1.831
2015-12-14 00:07:00	1.643
2015-12-14 00:08:00	1.661
2015-12-14 00:09:00	1.777
2015-12-14 00:10:00	2.161
2015-12-14 00:11:00	1.872
2015-12-14 00:12:00	2.118
2015-12-14 00:13:00	1.955
2015-12-14 00:14:00	1.706
2015-12-14 00:15:00	1.843
2015-12-14 00:16:00	1.653
2015-12-14 00:17:00	1.728
2015-12-14 00:18:00	1.686
2015-12-14 00:19:00	1.678
2015-12-14 00:20:00	1.982
2015-12-14 00:21:00	1.713
2015-12-14 00:22:00	1.865
2015-12-14 00:23:00	1.655
2015-12-14 00:24:00	1.741
2015-12-14 00:25:00	1.539
2015-12-14 00:26:00	1.639
2015-12-14 00:27:00	1.684
2015-12-14 00:28:00	1.378
2015-12-14 00:29:00	1.601
2015-12-14 00:30:00	1.373
2015-12-14 00:31:00	1.536
2015-12-14 00:32:00	1.291
2015-12-14 00:33:00	1.237
2015-12-14 00:34:00	1.526
2015-12-14 00:35:00	1.487
2015-12-14 00:36:00	1.526
2015-12-14 00:37:00	1.505
2015-12-14 00:38:00	1.427
2015-12-14 00:39:00	1.497
2015-12-14 00:40:00	1.643
2015-12-14 00:41:00	1.484
2015-12-14 00:42:00	1.6
2015-12-14 00:43:00	1.26
2015-12-14 00:44:00	1.655
2015-12-14 00:45:00	1.369
2015-12-14 00:46:00	1.63
2015-12-14 00:47:00	1.314
2015-12-14 00:48:00	1.522
2015-12-14 00:49:00	1.418
2015-12-14 00:50:00	1.338
2015-12-14 00:51:00	1.643
2015-12-14 00:52:00	1.139
2015-12-14 00:53:00	1.691
2015-12-14 00:54:00	1.456
2015-12-14 00:55:00	1.597
2015-12-14 00:56:00	1.532
2015-12-14 00:57:00	1.794
2015-12-14 00:58:00	1.711
2015-12-14 00:59:00	1.752
2015-12-14 01:00:00	1.623
2015-12-14 01:01:00	1.906
2015-12-14 01:02:00	1.923
2015-12-14 01:03:00	1.772
2015-12-14 01:04:00	2.031
2015-12-14 01:05:00	1.772
2015-12-14 01:06:00	2.03
2015-12-14 01:07:00	1.815
2015-12-14 01:08:00	2.039
2015-12-14 01:09:00	2.11
2015-12-14 01:10:00	1.878
2015-12-14 01:11:00	2.317
2015-12-14 01:12:00	1.849
2015-12-14 01:13:00	2.196
2015-12-14 01:14:00	2.178
2015-12-14 01:15:00	2.207
2015-12-14 01:16:00	2.22
2015-12-14 01:17:00	1.737
2015-12-14 01:18:00	1.9
2015-12-14 01:19:00	1.685
2015-12-14 01:20:00	2.108
2015-12-14 01:21:00	1.739
2015-12-14 01:22:00	1.731
2015-12-14 01:23:00	1.691
2015-12-14 01:24:00	1.723
2015-12-14 01:25:00	1.785
2015-12-14 01:26:00	1.534
2015-12-14 01:27:00	1.539
2015-12-14 01:28:00	1.382
2015-12-14 01:29:00	1.558
2015-12-14 01:30:00	1.551
2015-12-14 01:31:00	1.398
2015-12-14 01:32:00	1.456
2015-12-14 01:33:00	1.139
2015-12-14 01:34:00	1.402
2015-12-14 01:35:00	1.332
2015-12-14 01:36:00	1.293
2015-12-14 01:37:00	1.37
2015-12-14 01:38:00	1.281
2015-12-14 01:39:00	1.507
2015-12-14 01:40:00	1.258
2015-12-14 01:41:00	1.218
2015-12-14 01:42:00	1.397
2015-12-14 01:43:00	1.063
2015-12-14 01:44:00	1.32
2015-12-14 01:45:00	1.372
2015-12-14 01:46:00	1.155
2015-12-14 01:47:00	1.298
2015-12-14 01:48:00	1.32
2015-12-14 01:49:00	1.204
2015-12-14 01:50:00	1.432
2015-12-14 01:51:00	1.078
2015-12-14 01:52:00	1.375
2015-12-14 01:53:00	1.159
2015-12-14 01:54:00	1.282
2015-12-14 01:55:00	1.332
2015-12-14 01:56:00	1.158
2015-12-14 01:57:00	1.425
2015-12-14 01:58:00	1.328
2015-12-14 01:59:00	1.343
2015-12-14 02:00:00	1.434
2015-12-14 02:01:00	1.157
2015-12-14 02:02:00	1.391
2015-12-14 02:03:00	1.396
2015-12-14 02:04:00	1.218
2015-12-14 02:05:00	1.492
2015-12-14 02:06:00	1.499
2015-12-14 02:07:00	1.228
2015-12-14 02:08:00	1.44
2015-12-14 02:09:00	1.391
2015-12-14 02:10:00	1.19
2015-12-14 02:11:00	1.507
2015-12-14 02:12:00	1.455
2015-12-14 02:13:00	1.358
2015-12-14 02:14:00	1.349
2015-12-14 02:15:00	1.472
2015-12-14 02:16:00	1.484
2015-12-14 02:17:00	1.418
2015-12-14 02:18:00	1.69
2015-12-14 02:19:00	1.686
2015-12-14 02:20:00	1.626
2015-12-14 02:21:00	1.815
2015-12-14 02:22:00	1.987
2015-12-14 02:23:00	1.982
2015-12-14 02:24:00	1.871
2015-12-14 02:25:00	1.954
2015-12-14 02:26:00	2.043
2015-12-14 02:27:00	1.867
2015-12-14 02:28:00	1.991
2015-12-14 02:29:00	2.047
2015-12-14 02:30:00	1.84
2015-12-14 02:31:00	2.077
2015-12-14 02:32:00	1.853
2015-12-14 02:33:00	1.895
2015-12-14 02:34:00	1.87
2015-12-14 02:35:00	1.669
2015-12-14 02:36:00	1.887
2015-12-14 02:37:00	1.832
2015-12-14 02:38:00	1.516
2015-12-14 02:39:00	1.782
2015-12-14 02:40:00	1.749
2015-12-14 02:41:00	1.635
2015-12-14 02:42:00	1.562
2015-12-14 02:43:00	1.741
2015-12-14 02:44:00	1.524
2015-12-14 02:45:00	1.648
2015-12-14 02:46:00	1.757
2015-12-14 02:47:00	1.673
2015-12-14 02:48:00	1.784
2015-12-14 02:49:00	1.801
2015-12-14 02:50:00	1.674
2015-12-14 02:51:00	2.074
2015-12-14 02:52:00	2.132
2015-12-14 02:53:00	1.828
2015-12-14 02:54:00	2.145
2015-12-14 02:55:00	2.018
2015-12-14 02:56:00	2.034
2015-12-14 02:57:00	2.455
2015-12-14 02:58:00	2.014
2015-12-14 02:59:00	2.215
2015-12-14 03:00:00	2.37
2015-12-14 03:01:00	2.148
2015-12-14 03:02:00	2.368
2015-12-14 03:03:00	2.131
2015-12-14 03:04:00	2.203
2015-12-14 03:05:00	2.204
2015-12-14 03:06:00	2.44
2015-12-14 03:07:00	2.361
2015-12-14 03:08:00	2.169
2015-12-14 03:09:00	2.428
2015-12-14 03:10:00	2.306
2015-12-14 03:11:00	2.562
2015-12-14 03:12:00	2.359
2015-12-14 03:13:00	2.789
2015-12-14 03:14:00	2.896
2015-12-14 03:15:00	2.822
2015-12-14 03:16:00	2.844
2015-12-14 03:17:00	3.019
2015-12-14 03:18:00	2.784
2015-12-14 03:19:00	3.054
2015-12-14 03:20:00	3.127
2015-12-14 03:21:00	2.902
2015-12-14 03:22:00	3.094
2015-12-14 03:23:00	3.157
2015-12-14 03:24:00	3.059
2015-12-14 03:25:00	2.847
2015-12-14 03:26:00	3.053
2015-12-14 03:27:00	3.133
2015-12-14 03:28:00	3.032
2015-12-14 03:29:00	2.822
2015-12-14 03:30:00	3.189
2015-12-14 03:31:00	3.104
2015-12-14 03:32:00	2.94
2015-12-14 03:33:00	3.021
2015-12-14 03:34:00	3.048
2015-12-14 03:35:00	3.034
2015-12-14 03:36:00	2.921
2015-12-14 03:37:00	2.896
2015-12-14 03:38:00	3.17
2015-12-14 03:39:00	2.825
2015-12-14 03:40:00	2.806
2015-12-14 03:41:00	2.857
2015-12-14 03:42:00	2.795
2015-12-14 03:43:00	2.649
2015-12-14 03:44:00	2.832
2015-12-14 03:45:00	2.976
2015-12-14 03:46:00	2.717
2015-12-14 03:47:00	2.739
2015-12-14 03:48:00	2.913
2015-12-14 03:49:00	2.931
2015-12-14 03:50:00	2.602
2015-12-14 03:51:00	2.848
2015-12-14 03:52:00	2.885
2015-12-14 03:53:00	2.823
2015-12-14 03:54:00	2.861
2015-12-14 03:55:00	2.924
2015-12-14 03:56:00	2.67
2015-12-14 03:57:00	2.672
2015-12-14 03:58:00	2.949
2015-12-14 03:59:00	2.692
2015-12-14 04:00:00	2.614
2015-12-14 04:01:00	2.82
2015-12-14 04:02:00	2.672
2015-12-14 04:03:00	2.778
2015-12-14 04:04:00	2.857
2015-12-14 04:05:00	2.708
2015-12-14 04:06:00	2.665
2015-12-14 04:07:00	2.72
2015-12-14 04:08:00	2.703
2015-12-14 04:09:00	2.705
2015-12-14 04:10:00	2.798
2015-12-14 04:11:00	2.631
2015-12-14 04:12:00	2.663
2015-12-14 04:13:00	2.741
2015-12-14 04:14:00	2.705
2015-12-14 04:15:00	2.688
2015-12-14 04:16:00	2.67
2015-12-14 04:17:00	2.647
2015-12-14 04:18:00	2.612
2015-12-14 04:19:00	2.62
2015-12-14 04:20:00	2.473
2015-12-14 04:21:00	2.487
2015-12-14 04:22:00	2.647
2015-12-14 04:23:00	2.56
2015-12-14 04:24:00	2.585
2015-12-14 04:25:00	2.37
2015-12-14 04:26:00	2.551
2015-12-14 04:27:00	2.509
2015-12-14 04:28:00	2.401
2015-12-14 04:29:00	2.539
2015-12-14 04:30:00	2.421
2015-12-14 04:31:00	2.568
2015-12-14 04:32:00	2.578
2015-12-14 04:33:00	2.519
2015-12-14 04:34:00	2.429
2015-12-14 04:35:00	2.49
2015-12-14 04:36:00	2.465
2015-12-14 04:37:00	2.308
2015-12-14 04:38:00	2.458
2015-12-14 04:39:00	2.405
2015-12-14 04:40:00	2.562
2015-12-14 04:41:00	2.477
2015-12-14 04:42:00	2.315
2015-12-14 04:43:00	2.274
2015-12-14 04:44:00	2.317
2015-12-14 04:45:00	2.27
2015-12-14 04:46:00	2.364
2015-12-14 04:47:00	2.175
2015-12-14 04:48:00	2.405
2015-12-14 04:49:00	2.24
2015-12-14 04:50:00	2.137
2015-12-14 04:51:00	2.309
2015-12-14 04:52:00	2.176
2015-12-14 04:53:00	2.34
2015-12-14 04:54:00	2.222
2015-12-14 04:55:00	2.205
2015-12-14 04:56:00	2.148
2015-12-14 04:57:00	2.276
2015-12-14 04:58:00	2.205
2015-12-14 04:59:00	2.18
2015-12-14 05:00:00	2.219
2015-12-14 05:01:00	2.229
2015-12-14 05:02:00	2.259
2015-12-14 05:03:00	2.215
2015-12-14 05:04:00	2.278
2015-12-14 05:05:00	2.09
2015-12-14 05:06:00	2.342
2015-12-14 05:07:00	2.183
2015-12-14 05:08:00	2.279
2015-12-14 05:09:00	2.136
2015-12-14 05:10:00	2.221
2015-12-14 05:11:00	2.176
2015-12-14 05:12:00	2.124
2015-12-14 05:13:00	2.234
2015-12-14 05:14:00	2.182
2015-12-14 05:15:00	2.188
2015-12-14 05:16:00	2.014
2015-12-14 05:17:00	2.197
2015-12-14 05:18:00	2.204
2015-12-14 05:19:00	2.179
2015-12-14 05:20:00	2.145
2015-12-14 05:21:00	2.153
2015-12-14 05:22:00	2.12
2015-12-14 05:23:00	2.26
2015-12-14 05:24:00	2.246
2015-12-14 05:25:00	2.204
2015-12-14 05:26:00	2.097
2015-12-14 05:27:00	2.36
2015-12-14 05:28:00	2.138
2015-12-14 05:29:00	2.355
2015-12-14 05:30:00	2.417
2015-12-14 05:31:00	2.094
2015-12-14 05:32:00	2.124
2015-12-14 05:33:00	2.273
2015-12-14 05:34:00	2.2
2015-12-14 05:35:00	2.367
2015-12-14 05:36:00	2.346
2015-12-14 05:37:00	2.415
2015-12-14 05:38:00	2.267
2015-12-14 05:39:00	2.209
2015-12-14 05:40:00	2.288
2015-12-14 05:41:00	2.493
2015-12-14 05:42:00	2.295
2015-12-14 05:43:00	2.246
2015-12-14 05:44:00	2.23
2015-12-14 05:45:00	2.469
2015-12-14 05:46:00	2.273
2015-12-14 05:47:00	2.323
2015-12-14 05:48:00	2.424
2015-12-14 05:49:00	2.105
2015-12-14 05:50:00	2.389
2015-12-14 05:51:00	2.529
2015-12-14 05:52:00	2.333
2015-12-14 05:53:00	2.401
2015-12-14 05:54:00	2.656
2015-12-14 05:55:00	2.384
2015-12-14 05:56:00	2.317
2015-12-14 05:57:00	2.444
2015-12-14 05:58:00	2.6
2015-12-14 05:59:00	2.25
2015-12-14 06:00:00	2.506
2015-12-14 06:01:00	2.603
2015-12-14 06:02:00	2.146
2015-12-14 06:03:00	2.615
2015-12-14 06:04:00	2.189
2015-12-14 06:05:00	2.417
2015-12-14 06:06:00	2.505
2015-12-14 06:07:00	2.137
2015-12-14 06:08:00	2.5
2015-12-14 06:09:00	2.149
2015-12-14 06:10:00	2.427
2015-12-14 06:11:00	2.295
2015-12-14 06:12:00	2.239
2015-12-14 06:13:00	2.342
2015-12-14 06:14:00	2.373
2015-12-14 06:15:00	2.176
2015-12-14 06:16:00	2.306
2015-12-14 06:17:00	2.495
2015-12-14 06:18:00	2.248
2015-12-14 06:19:00	2.274
2015-12-14 06:20:00	2.536
2015-12-14 06:21:00	2.581
2015-12-14 06:22:00	2.348
2015-12-14 06:23:00	2.521
2015-12-14 06:24:00	2.464
2015-12-14 06:25:00	2.219
2015-12-14 06:26:00	2.446
2015-12-14 06:27:00	2.519
2015-12-14 06:28:00	2.422
2015-12-14 06:29:00	2.36
2015-12-14 06:30:00	2.474
2015-12-14 06:31:00	2.41
2015-12-14 06:32:00	2.414
2015-12-14 06:33:00	2.322
2015-12-14 06:34:00	2.389
2015-12-14 06:35:00	2.557
2015-12-14 06:36:00	2.453
2015-12-14 06:37:00	2.255
2015-12-14 06:38:00	2.622
2015-12-14 06:39:00	2.329
2015-12-14 06:40:00	2.549
2015-12-14 06:41:00	2.443
2015-12-14 06:42:00	2.365
2015-12-14 06:43:00	2.513
2015-12-14 06:44:00	2.251
2015-12-14 06:45:00	2.532
2015-12-14 06:46:00	2.442
2015-12-14 06:47:00	2.481
2015-12-14 06:48:00	2.393
2015-12-14 06:49:00	2.541
2015-12-14 06:50:00	2.356
2015-12-14 06:51:00	2.661
2015-12-14 06:52:00	2.423
2015-12-14 06:53:00	2.713
2015-12-14 06:54:00	2.369
2015-12-14 06:55:00	2.606
2015-12-14 06:56:00	2.294
2015-12-14 06:57:00	2.697
2015-12-14 06:58:00	2.256
2015-12-14 06:59:00	2.662
2015-12-14 07:00:00	2.517
2015-12-14 07:01:00	2.958
2015-12-14 07:02:00	3.011
2015-12-14 07:03:00	2.701
2015-12-14 07:04:00	2.701
2015-12-14 07:05:00	2.372
2015-12-14 07:06:00	2.598
2015-12-14 07:07:00	2.669
2015-12-14 07:08:00	2.447
2015-12-14 07:09:00	2.642
2015-12-14 07:10:00	2.597
2015-12-14 07:11:00	2.356
2015-12-14 07:12:00	2.808
2015-12-14 07:13:00	2.455
2015-12-14 07:14:00	2.699
2015-12-14 07:15:00	2.689
2015-12-14 07:16:00	2.426
2015-12-14 07:17:00	2.852
2015-12-14 07:18:00	2.8
2015-12-14 07:19:00	2.873
2015-12-14 07:20:00	2.786
2015-12-14 07:21:00	2.462
2015-12-14 07:22:00	2.84
2015-12-14 07:23:00	2.707
2015-12-14 07:24:00	2.732
2015-12-14 07:25:00	2.967
2015-12-14 07:26:00	2.827
2015-12-14 07:27:00	2.776
2015-12-14 07:28:00	2.997
2015-12-14 07:29:00	3.075
2015-12-14 07:30:00	2.884
2015-12-14 07:31:00	3.241
2015-12-14 07:32:00	3.223
2015-12-14 07:33:00	2.914
2015-12-14 07:34:00	3.369
2015-12-14 07:35:00	3.293
2015-12-14 07:36:00	3.146
2015-12-14 07:37:00	3.104
2015-12-14 07:38:00	3.122
2015-12-14 07:39:00	3.47
2015-12-14 07:40:00	3.333
2015-12-14 07:41:00	3.231
2015-12-14 07:42:00	3.232
2015-12-14 07:43:00	3.226
2015-12-14 07:44:00	3.291
2015-12-14 07:45:00	2.918
2015-12-14 07:46:00	3.731
2015-12-14 07:47:00	3.801
2015-12-14 07:48:00	3.84
2015-12-14 07:49:00	3.66
2015-12-14 07:50:00	3.861
2015-12-14 07:51:00	3.813
2015-12-14 07:52:00	3.332
2015-12-14 07:53:00	3.163
2015-12-14 07:54:00	3.304
2015-12-14 07:55:00	3.497
2015-12-14 07:56:00	3.435
2015-12-14 07:57:00	3.505
2015-12-14 07:58:00	3.487
2015-12-14 07:59:00	3.631
2015-12-14 08:00:00	3.466
2015-12-14 08:01:00	3.574
2015-12-14 08:02:00	3.64
2015-12-14 08:03:00	3.821
2015-12-14 08:04:00	3.542
2015-12-14 08:05:00	3.598
2015-12-14 08:06:00	3.773
2015-12-14 08:07:00	3.776
2015-12-14 08:08:00	3.603
2015-12-14 08:09:00	4.038
2015-12-14 08:10:00	3.866
2015-12-14 08:11:00	3.706
2015-12-14 08:12:00	3.926
2015-12-14 08:13:00	3.62
2015-12-14 08:14:00	4.049
2015-12-14 08:15:00	3.795
2015-12-14 08:16:00	3.899
2015-12-14 08:17:00	3.806
2015-12-14 08:18:00	4.172
2015-12-14 08:19:00	3.699
2015-12-14 08:20:00	4.105
2015-12-14 08:21:00	4.262
2015-12-14 08:22:00	3.868
2015-12-14 08:23:00	4.223
2015-12-14 08:24:00	4.336
2015-12-14 08:25:00	4.058
2015-12-14 08:26:00	3.811
2015-12-14 08:27:00	4.033
2015-12-14 08:28:00	3.664
2015-12-14 08:29:00	3.983
2015-12-14 08:30:00	3.691
2015-12-14 08:31:00	3.597
2015-12-14 08:32:00	3.975
2015-12-14 08:33:00	3.659
2015-12-14 08:34:00	3.85
2015-12-14 08:35:00	3.729
2015-12-14 08:36:00	3.741
2015-12-14 08:37:00	3.976
2015-12-14 08:38:00	3.76
2015-12-14 08:39:00	4.137
2015-12-14 08:40:00	3.772
2015-12-14 08:41:00	4.127
2015-12-14 08:42:00	3.662
2015-12-14 08:43:00	3.967
2015-12-14 08:44:00	3.792
2015-12-14 08:45:00	4.117
2015-12-14 08:46:00	3.867
2015-12-14 08:47:00	4.039
2015-12-14 08:48:00	4.115
2015-12-14 08:49:00	3.962
2015-12-14 08:50:00	3.928
2015-12-14 08:51:00	3.882
2015-12-14 08:52:00	4.613
2015-12-14 08:53:00	4.241
2015-12-14 08:54:00	4.062
2015-12-14 08:55:00	3.843
2015-12-14 08:56:00	4.141
2015-12-14 08:57:00	4.088
2015-12-14 08:58:00	3.914
2015-12-14 08:59:00	4.224
2015-12-14 09:00:00	4.067
2015-12-14 09:01:00	4.406
2015-12-14 09:02:00	4.293
2015-12-14 09:03:00	4.747
2015-12-14 09:04:00	4.328
2015-12-14 09:05:00	3.978
2015-12-14 09:06:00	4.243
2015-12-14 09:07:00	4.422
2015-12-14 09:08:00	4.12
2015-12-14 09:09:00	4.112
2015-12-14 09:10:00	3.979
2015-12-14 09:11:00	4.169
2015-12-14 09:12:00	4.053
2015-12-14 09:13:00	3.773
2015-12-14 09:14:00	4.039
2015-12-14 09:15:00	3.957
2015-12-14 09:16:00	4.176
2015-12-14 09:17:00	3.839
2015-12-14 09:18:00	3.703
2015-12-14 09:19:00	3.937
[truncated: 8,946 more rows]

## Sheet: PVM
LWC [g m-3]	Date and time
0.0298	2015-12-13 00:00:05
0.0298	2015-12-13 00:00:16
0.0298	2015-12-13 00:00:27
0.0298	2015-12-13 00:00:38
0.0298	2015-12-13 00:00:49
0.0298	2015-12-13 00:01:00
0.0298	2015-12-13 00:01:11
0.0298	2015-12-13 00:01:22
0.0298	2015-12-13 00:01:33
0.0298	2015-12-13 00:01:44
0.0298	2015-12-13 00:01:55
0.0298	2015-12-13 00:02:06
0.0298	2015-12-13 00:02:17
0.0298	2015-12-13 00:02:28
0.0298	2015-12-13 00:02:39
0.0298	2015-12-13 00:02:50
0.0298	2015-12-13 00:03:01
0.0298	2015-12-13 00:03:12
0.0298	2015-12-13 00:03:23
0.0298	2015-12-13 00:03:34
0.0298	2015-12-13 00:03:45
0.0298	2015-12-13 00:03:56
0.0298	2015-12-13 00:04:07
0.0298	2015-12-13 00:04:18
0.0298	2015-12-13 00:04:29
0.0298	2015-12-13 00:04:40
0.0298	2015-12-13 00:04:51
0.0298	2015-12-13 00:05:02
0.0298	2015-12-13 00:05:13
0.0298	2015-12-13 00:05:24
0.0298	2015-12-13 00:05:35
0.0298	2015-12-13 00:05:46
0.0298	2015-12-13 00:05:57
0.0298	2015-12-13 00:06:08
0.0298	2015-12-13 00:06:19
0.0298	2015-12-13 00:06:30
0.0298	2015-12-13 00:06:41
0.0298	2015-12-13 00:06:52
0.0298	2015-12-13 00:07:03
0.0298	2015-12-13 00:07:14
0.0298	2015-12-13 00:07:25
0.0298	2015-12-13 00:07:36
0.0298	2015-12-13 00:07:47
0.0298	2015-12-13 00:07:58
0.0298	2015-12-13 00:08:09
0.0298	2015-12-13 00:08:20
0.0298	2015-12-13 00:08:31
0.0298	2015-12-13 00:08:42
0.0298	2015-12-13 00:08:53
0.0298	2015-12-13 00:09:04
0.0298	2015-12-13 00:09:15
0.0298	2015-12-13 00:09:26
0.0298	2015-12-13 00:09:37
0.0298	2015-12-13 00:09:48
0.0298	2015-12-13 00:09:59
0.0298	2015-12-13 00:10:10
0.0298	2015-12-13 00:10:21
0.0298	2015-12-13 00:10:32
0.0298	2015-12-13 00:10:43
0.0298	2015-12-13 00:10:54
0.0298	2015-12-13 00:11:05
0.0298	2015-12-13 00:11:16
0.0298	2015-12-13 00:11:27
0.0298	2015-12-13 00:11:38
0.0298	2015-12-13 00:11:49
0.0298	2015-12-13 00:12:00
0.0298	2015-12-13 00:12:11
0.0298	2015-12-13 00:12:22
0.0298	2015-12-13 00:12:33
0.0298	2015-12-13 00:12:44
0.0298	2015-12-13 00:12:55
0.0298	2015-12-13 00:13:06
0.0298	2015-12-13 00:13:17
0.0298	2015-12-13 00:13:28
0.0298	2015-12-13 00:13:39
0.0298	2015-12-13 00:13:50
0.0298	2015-12-13 00:14:01
0.0298	2015-12-13 00:14:12
0.0298	2015-12-13 00:14:23
0.0298	2015-12-13 00:14:34
0.0298	2015-12-13 00:14:45
0.0298	2015-12-13 00:14:56
0.0298	2015-12-13 00:15:07
0.0298	2015-12-13 00:15:18
0.0298	2015-12-13 00:15:29
0.0298	2015-12-13 00:15:40
0.0298	2015-12-13 00:15:51
0.0298	2015-12-13 00:16:02
0.0298	2015-12-13 00:16:13
0.0298	2015-12-13 00:16:24
0.0298	2015-12-13 00:16:35
0.0298	2015-12-13 00:16:46
0.0298	2015-12-13 00:16:57
0.0298	2015-12-13 00:17:08
0.0298	2015-12-13 00:17:19
0.0298	2015-12-13 00:17:30
0.0298	2015-12-13 00:17:41
0.0298	2015-12-13 00:17:52
0.0298	2015-12-13 00:18:03
0.0298	2015-12-13 00:18:14
0.0298	2015-12-13 00:18:25
0.0298	2015-12-13 00:18:36
0.0298	2015-12-13 00:18:47
0.0298	2015-12-13 00:18:58
0.0298	2015-12-13 00:19:09
0.0298	2015-12-13 00:19:20
0.0298	2015-12-13 00:19:31
0.0298	2015-12-13 00:19:42
0.0298	2015-12-13 00:19:53
0.0298	2015-12-13 00:20:04
0.0298	2015-12-13 00:20:15
0.0298	2015-12-13 00:20:26
0.0298	2015-12-13 00:20:37
0.0298	2015-12-13 00:20:48
0.0298	2015-12-13 00:20:59
0.0298	2015-12-13 00:21:10
0.0298	2015-12-13 00:21:21
0.0298	2015-12-13 00:21:32
0.0298	2015-12-13 00:21:43
0.0298	2015-12-13 00:21:54
0.0298	2015-12-13 00:22:05
0.0298	2015-12-13 00:22:16
0.0298	2015-12-13 00:22:27
0.0298	2015-12-13 00:22:38
0.0298	2015-12-13 00:22:49
0.0298	2015-12-13 00:23:00
0.0298	2015-12-13 00:23:11
0.0298	2015-12-13 00:23:22
0.0298	2015-12-13 00:23:33
0.0298	2015-12-13 00:23:44
0.0298	2015-12-13 00:23:55
0.0298	2015-12-13 00:24:06
0.0298	2015-12-13 00:24:17
0.0298	2015-12-13 00:24:28
0.0298	2015-12-13 00:24:39
0.0298	2015-12-13 00:24:50
0.0298	2015-12-13 00:25:01
0.0298	2015-12-13 00:25:12
0.0298	2015-12-13 00:25:23
0.0298	2015-12-13 00:25:34
0.0298	2015-12-13 00:25:45
0.0298	2015-12-13 00:25:56
0.0298	2015-12-13 00:26:07
0.0298	2015-12-13 00:26:18
0.0298	2015-12-13 00:26:29
0.0298	2015-12-13 00:26:40
0.0298	2015-12-13 00:26:51
0.0298	2015-12-13 00:27:02
0.0298	2015-12-13 00:27:13
0.0298	2015-12-13 00:27:24
0.0298	2015-12-13 00:27:35
0.0298	2015-12-13 00:27:46
0.0298	2015-12-13 00:27:57
0.0298	2015-12-13 00:28:08
0.0298	2015-12-13 00:28:19
0.0298	2015-12-13 00:28:30
0.0298	2015-12-13 00:28:41
0.0298	2015-12-13 00:28:52
0.0298	2015-12-13 00:29:03
0.0298	2015-12-13 00:29:14
0.0298	2015-12-13 00:29:25
0.0298	2015-12-13 00:29:36
0.0298	2015-12-13 00:29:47
0.0298	2015-12-13 00:29:58
0.0298	2015-12-13 00:30:09
0.0298	2015-12-13 00:30:20
0.0298	2015-12-13 00:30:31
0.0298	2015-12-13 00:30:42
0.0298	2015-12-13 00:30:53
0.0298	2015-12-13 00:31:04
0.0298	2015-12-13 00:31:15
0.0298	2015-12-13 00:31:26
0.0298	2015-12-13 00:31:37
0.0298	2015-12-13 00:31:48
0.0298	2015-12-13 00:31:59
0.0298	2015-12-13 00:32:10
0.0298	2015-12-13 00:32:21
0.0298	2015-12-13 00:32:32
0.0298	2015-12-13 00:32:43
0.0298	2015-12-13 00:32:54
0.0298	2015-12-13 00:33:05
0.0298	2015-12-13 00:33:16
0.0298	2015-12-13 00:33:27
0.0298	2015-12-13 00:33:38
0.0298	2015-12-13 00:33:49
0.0298	2015-12-13 00:34:00
0.0298	2015-12-13 00:34:11
0.0298	2015-12-13 00:34:22
0.0298	2015-12-13 00:34:33
0.0298	2015-12-13 00:34:44
0.0298	2015-12-13 00:34:55
0.0298	2015-12-13 00:35:06
0.0298	2015-12-13 00:35:17
0.0298	2015-12-13 00:35:28
0.0298	2015-12-13 00:35:39
0.0298	2015-12-13 00:35:50
0.0298	2015-12-13 00:36:01
0.0298	2015-12-13 00:36:12
0.0298	2015-12-13 00:36:23
0.0298	2015-12-13 00:36:34
0.0298	2015-12-13 00:36:45
0.0298	2015-12-13 00:36:56
0.0298	2015-12-13 00:37:07
0.0298	2015-12-13 00:37:18
0.0298	2015-12-13 00:37:29
0.0298	2015-12-13 00:37:40
0.0298	2015-12-13 00:37:51
0.0298	2015-12-13 00:38:02
0.0298	2015-12-13 00:38:13
0.0298	2015-12-13 00:38:24
0.0298	2015-12-13 00:38:35
0.0298	2015-12-13 00:38:46
0.0298	2015-12-13 00:38:57
0.0298	2015-12-13 00:39:08
0.0298	2015-12-13 00:39:19
0.0298	2015-12-13 00:39:30
0.0298	2015-12-13 00:39:41
0.0298	2015-12-13 00:39:52
0.0298	2015-12-13 00:40:03
0.0298	2015-12-13 00:40:14
0.0298	2015-12-13 00:40:25
0.0298	2015-12-13 00:40:36
0.0298	2015-12-13 00:40:47
0.0298	2015-12-13 00:40:58
0.0298	2015-12-13 00:41:09
0.0298	2015-12-13 00:41:20
0.0298	2015-12-13 00:41:31
0.0298	2015-12-13 00:41:42
0.0298	2015-12-13 00:41:53
0.0298	2015-12-13 00:42:04
0.0298	2015-12-13 00:42:15
0.0298	2015-12-13 00:42:26
0.0298	2015-12-13 00:42:37
0.0298	2015-12-13 00:42:48
0.0298	2015-12-13 00:42:59
0.0298	2015-12-13 00:43:10
0.0298	2015-12-13 00:43:21
0.0298	2015-12-13 00:43:32
0.0298	2015-12-13 00:43:43
0.0298	2015-12-13 00:43:54
0.0298	2015-12-13 00:44:05
0.0298	2015-12-13 00:44:16
0.0298	2015-12-13 00:44:27
0.0298	2015-12-13 00:44:38
0.0298	2015-12-13 00:44:49
0.0298	2015-12-13 00:45:00
0.0298	2015-12-13 00:45:11
0.0298	2015-12-13 00:45:22
0.0298	2015-12-13 00:45:33
0.0298	2015-12-13 00:45:44
0.0298	2015-12-13 00:45:55
0.0298	2015-12-13 00:46:06
0.0298	2015-12-13 00:46:17
0.0298	2015-12-13 00:46:28
0.0298	2015-12-13 00:46:39
0.0298	2015-12-13 00:46:50
0.0298	2015-12-13 00:47:01
0.0298	2015-12-13 00:47:12
0.0298	2015-12-13 00:47:23
0.0298	2015-12-13 00:47:34
0.0298	2015-12-13 00:47:45
0.0298	2015-12-13 00:47:56
0.0298	2015-12-13 00:48:07
0.0298	2015-12-13 00:48:18
0.0298	2015-12-13 00:48:29
0.0298	2015-12-13 00:48:40
0.0298	2015-12-13 00:48:51
0.0298	2015-12-13 00:49:02
0.0298	2015-12-13 00:49:13
0.0298	2015-12-13 00:49:24
0.0298	2015-12-13 00:49:35
0.0298	2015-12-13 00:49:46
0.0298	2015-12-13 00:49:57
0.0298	2015-12-13 00:50:08
0.0298	2015-12-13 00:50:19
0.0298	2015-12-13 00:50:30
0.0298	2015-12-13 00:50:41
0.0298	2015-12-13 00:50:52
0.0298	2015-12-13 00:51:03
0.0298	2015-12-13 00:51:14
0.0298	2015-12-13 00:51:25
0.0298	2015-12-13 00:51:36
0.0298	2015-12-13 00:51:47
0.0298	2015-12-13 00:51:58
0.0298	2015-12-13 00:52:09
0.0298	2015-12-13 00:52:20
0.0298	2015-12-13 00:52:31
0.0298	2015-12-13 00:52:42
0.0298	2015-12-13 00:52:53
0.0298	2015-12-13 00:53:04
0.0298	2015-12-13 00:53:15
0.0298	2015-12-13 00:53:26
0.0298	2015-12-13 00:53:37
0.0298	2015-12-13 00:53:48
0.0298	2015-12-13 00:53:59
0.0298	2015-12-13 00:54:10
0.0298	2015-12-13 00:54:21
0.0298	2015-12-13 00:54:32
0.0298	2015-12-13 00:54:43
0.0298	2015-12-13 00:54:54
0.0298	2015-12-13 00:55:05
0.0298	2015-12-13 00:55:16
0.0298	2015-12-13 00:55:27
0.0298	2015-12-13 00:55:38
0.0298	2015-12-13 00:55:49
0.0298	2015-12-13 00:56:00
0.0298	2015-12-13 00:56:11
0.0298	2015-12-13 00:56:22
0.0298	2015-12-13 00:56:33
0.0298	2015-12-13 00:56:44
0.0298	2015-12-13 00:56:55
0.0298	2015-12-13 00:57:06
0.0298	2015-12-13 00:57:17
0.0298	2015-12-13 00:57:28
0.0298	2015-12-13 00:57:39
0.0298	2015-12-13 00:57:50
0.0298	2015-12-13 00:58:01
0.0298	2015-12-13 00:58:12
0.0298	2015-12-13 00:58:23
0.0298	2015-12-13 00:58:34
0.0298	2015-12-13 00:58:45
0.0298	2015-12-13 00:58:56
0.0298	2015-12-13 00:59:07
0.0298	2015-12-13 00:59:18
0.0298	2015-12-13 00:59:29
0.0298	2015-12-13 00:59:40
0.0298	2015-12-13 00:59:51
0.0298	2015-12-13 01:00:02
0.0298	2015-12-13 01:00:13
0.0298	2015-12-13 01:00:24
0.0298	2015-12-13 01:00:35
0.0298	2015-12-13 01:00:46
0.0298	2015-12-13 01:00:57
0.0298	2015-12-13 01:01:08
0.0298	2015-12-13 01:01:19
0.0298	2015-12-13 01:01:30
0.0298	2015-12-13 01:01:41
0.0298	2015-12-13 01:01:52
0.0298	2015-12-13 01:02:03
0.0298	2015-12-13 01:02:14
0.0298	2015-12-13 01:02:25
0.0298	2015-12-13 01:02:36
0.0298	2015-12-13 01:02:47
0.0298	2015-12-13 01:02:58
0.0298	2015-12-13 01:03:09
0.0298	2015-12-13 01:03:20
0.0298	2015-12-13 01:03:31
0.0298	2015-12-13 01:03:42
0.0298	2015-12-13 01:03:53
0.0298	2015-12-13 01:04:04
0.0298	2015-12-13 01:04:15
0.0298	2015-12-13 01:04:26
0.0298	2015-12-13 01:04:37
0.0298	2015-12-13 01:04:48
0.0298	2015-12-13 01:04:59
0.0298	2015-12-13 01:05:10
0.0298	2015-12-13 01:05:21
0.0298	2015-12-13 01:05:32
0.0298	2015-12-13 01:05:43
0.0298	2015-12-13 01:05:54
0.0298	2015-12-13 01:06:05
0.0298	2015-12-13 01:06:16
0.0298	2015-12-13 01:06:27
0.0298	2015-12-13 01:06:38
0.0298	2015-12-13 01:06:49
0.0298	2015-12-13 01:07:00
0.0298	2015-12-13 01:07:11
0.0298	2015-12-13 01:07:22
0.0298	2015-12-13 01:07:33
0.0298	2015-12-13 01:07:44
0.0298	2015-12-13 01:07:55
0.0298	2015-12-13 01:08:06
0.0298	2015-12-13 01:08:17
0.0298	2015-12-13 01:08:28
0.0298	2015-12-13 01:08:39
0.0298	2015-12-13 01:08:50
0.0298	2015-12-13 01:09:01
0.0298	2015-12-13 01:09:12
0.0298	2015-12-13 01:09:23
0.0298	2015-12-13 01:09:34
0.0298	2015-12-13 01:09:45
0.0298	2015-12-13 01:09:56
0.0298	2015-12-13 01:10:07
0.0298	2015-12-13 01:10:18
0.0298	2015-12-13 01:10:29
0.0298	2015-12-13 01:10:40
0.0298	2015-12-13 01:10:51
0.0298	2015-12-13 01:11:02
0.0298	2015-12-13 01:11:13
0.0298	2015-12-13 01:11:24
0.0298	2015-12-13 01:11:35
0.0298	2015-12-13 01:11:46
0.0298	2015-12-13 01:11:57
0.0298	2015-12-13 01:12:08
0.0298	2015-12-13 01:12:19
0.0298	2015-12-13 01:12:30
0.0298	2015-12-13 01:12:41
0.0298	2015-12-13 01:12:52
0.0298	2015-12-13 01:13:03
0.0298	2015-12-13 01:13:14
0.0298	2015-12-13 01:13:25
0.0298	2015-12-13 01:13:36
0.0298	2015-12-13 01:13:47
0.0298	2015-12-13 01:13:58
0.0298	2015-12-13 01:14:09
0.0298	2015-12-13 01:14:20
0.0298	2015-12-13 01:14:31
0.0298	2015-12-13 01:14:42
0.0298	2015-12-13 01:14:53
0.0298	2015-12-13 01:15:04
0.0298	2015-12-13 01:15:15
0.0298	2015-12-13 01:15:26
0.0298	2015-12-13 01:15:37
0.0298	2015-12-13 01:15:48
0.0298	2015-12-13 01:15:59
0.0298	2015-12-13 01:16:10
0.0298	2015-12-13 01:16:21
0.0298	2015-12-13 01:16:32
0.0298	2015-12-13 01:16:43
0.0298	2015-12-13 01:16:54
0.0298	2015-12-13 01:17:05
0.0298	2015-12-13 01:17:16
0.0298	2015-12-13 01:17:27
0.0298	2015-12-13 01:17:38
0.0298	2015-12-13 01:17:49
0.0298	2015-12-13 01:18:00
0.0298	2015-12-13 01:18:11
0.0298	2015-12-13 01:18:22
0.0298	2015-12-13 01:18:33
0.0298	2015-12-13 01:18:44
0.0298	2015-12-13 01:18:55
0.0298	2015-12-13 01:19:06
0.0298	2015-12-13 01:19:17
0.0298	2015-12-13 01:19:28
0.0298	2015-12-13 01:19:39
0.0298	2015-12-13 01:19:50
0.0298	2015-12-13 01:20:01
0.0298	2015-12-13 01:20:12
0.0298	2015-12-13 01:20:23
0.0298	2015-12-13 01:20:34
0.0298	2015-12-13 01:20:45
0.0298	2015-12-13 01:20:56
0.0298	2015-12-13 01:21:07
0.0298	2015-12-13 01:21:18
0.0298	2015-12-13 01:21:29
0.0298	2015-12-13 01:21:40
0.0298	2015-12-13 01:21:51
0.0298	2015-12-13 01:22:02
0.0298	2015-12-13 01:22:13
0.0298	2015-12-13 01:22:24
0.0298	2015-12-13 01:22:35
0.0298	2015-12-13 01:22:46
0.0298	2015-12-13 01:22:57
0.0298	2015-12-13 01:23:08
0.0298	2015-12-13 01:23:19
0.0298	2015-12-13 01:23:30
0.0298	2015-12-13 01:23:41
0.0298	2015-12-13 01:23:52
0.0298	2015-12-13 01:24:03
0.0298	2015-12-13 01:24:14
0.0298	2015-12-13 01:24:25
0.0298	2015-12-13 01:24:36
0.0298	2015-12-13 01:24:47
0.0298	2015-12-13 01:24:58
0.0298	2015-12-13 01:25:09
0.0298	2015-12-13 01:25:20
0.0298	2015-12-13 01:25:31
0.0298	2015-12-13 01:25:42
0.0298	2015-12-13 01:25:53
0.0298	2015-12-13 01:26:04
0.0298	2015-12-13 01:26:15
0.0298	2015-12-13 01:26:26
0.0298	2015-12-13 01:26:37
0.0298	2015-12-13 01:26:48
0.0298	2015-12-13 01:26:59
0.0298	2015-12-13 01:27:10
0.0298	2015-12-13 01:27:21
0.0298	2015-12-13 01:27:32
0.0298	2015-12-13 01:27:43
0.0298	2015-12-13 01:27:54
0.0298	2015-12-13 01:28:05
0.0298	2015-12-13 01:28:16
0.0298	2015-12-13 01:28:27
0.0298	2015-12-13 01:28:38
0.0298	2015-12-13 01:28:49
0.0298	2015-12-13 01:29:00
0.0298	2015-12-13 01:29:11
0.0298	2015-12-13 01:29:22
0.0298	2015-12-13 01:29:33
0.0298	2015-12-13 01:29:44
0.0298	2015-12-13 01:29:55
0.0298	2015-12-13 01:30:06
0.0298	2015-12-13 01:30:17
0.0298	2015-12-13 01:30:28
0.0298	2015-12-13 01:30:39
0.0298	2015-12-13 01:30:50
0.0298	2015-12-13 01:31:01
0.0298	2015-12-13 01:31:12
0.0298	2015-12-13 01:31:23
0.0298	2015-12-13 01:31:34
0.0298	2015-12-13 01:31:45
0.0298	2015-12-13 01:31:56
0.0298	2015-12-13 01:32:07
0.0298	2015-12-13 01:32:18
0.0298	2015-12-13 01:32:29
0.0298	2015-12-13 01:32:40
0.0298	2015-12-13 01:32:51
0.0298	2015-12-13 01:33:02
0.0298	2015-12-13 01:33:13
0.0298	2015-12-13 01:33:24
0.0298	2015-12-13 01:33:35
0.0298	2015-12-13 01:33:46
0.0298	2015-12-13 01:33:57
0.0298	2015-12-13 01:34:08
0.0298	2015-12-13 01:34:19
0.0298	2015-12-13 01:34:30
0.0298	2015-12-13 01:34:41
0.0298	2015-12-13 01:34:52
0.0298	2015-12-13 01:35:03
0.0298	2015-12-13 01:35:14
0.0298	2015-12-13 01:35:25
0.0298	2015-12-13 01:35:36
0.0298	2015-12-13 01:35:47
0.0298	2015-12-13 01:35:58
0.0298	2015-12-13 01:36:09
0.0298	2015-12-13 01:36:20
0.0298	2015-12-13 01:36:31
0.0298	2015-12-13 01:36:42
0.0298	2015-12-13 01:36:53
0.0298	2015-12-13 01:37:04
0.0298	2015-12-13 01:37:15
0.0298	2015-12-13 01:37:26
0.0298	2015-12-13 01:37:37
0.0298	2015-12-13 01:37:48
0.0298	2015-12-13 01:37:59
0.0298	2015-12-13 01:38:10
0.0298	2015-12-13 01:38:21
0.0298	2015-12-13 01:38:32
0.0299	2015-12-13 01:38:43
0.03	2015-12-13 01:38:54
0.0298	2015-12-13 01:39:05
0.0298	2015-12-13 01:39:16
0.0298	2015-12-13 01:39:27
0.0298	2015-12-13 01:39:38
0.0298	2015-12-13 01:39:49
0.0298	2015-12-13 01:40:00
0.0298	2015-12-13 01:40:11
0.0298	2015-12-13 01:40:22
0.0298	2015-12-13 01:40:33
0.0298	2015-12-13 01:40:44
0.0298	2015-12-13 01:40:55
0.0298	2015-12-13 01:41:06
0.0298	2015-12-13 01:41:17
0.0298	2015-12-13 01:41:28
0.0298	2015-12-13 01:41:39
0.0298	2015-12-13 01:41:50
0.0298	2015-12-13 01:42:01
0.0298	2015-12-13 01:42:12
0.0298	2015-12-13 01:42:23
0.0298	2015-12-13 01:42:34
0.0298	2015-12-13 01:42:45
0.0298	2015-12-13 01:42:56
0.0298	2015-12-13 01:43:07
0.0298	2015-12-13 01:43:18
0.0298	2015-12-13 01:43:29
0.0298	2015-12-13 01:43:40
0.0298	2015-12-13 01:43:51
0.0298	2015-12-13 01:44:02
0.0298	2015-12-13 01:44:13
0.0298	2015-12-13 01:44:24
0.0298	2015-12-13 01:44:35
0.0298	2015-12-13 01:44:46
0.0298	2015-12-13 01:44:57
0.0298	2015-12-13 01:45:08
0.0298	2015-12-13 01:45:19
0.0298	2015-12-13 01:45:30
0.0298	2015-12-13 01:45:41
0.0298	2015-12-13 01:45:52
0.0298	2015-12-13 01:46:03
0.0298	2015-12-13 01:46:14
0.0298	2015-12-13 01:46:25
0.0298	2015-12-13 01:46:36
0.0298	2015-12-13 01:46:47
0.0298	2015-12-13 01:46:58
0.0298	2015-12-13 01:47:09
0.0298	2015-12-13 01:47:20
0.0298	2015-12-13 01:47:31
0.0298	2015-12-13 01:47:42
0.0298	2015-12-13 01:47:53
0.0298	2015-12-13 01:48:04
0.0298	2015-12-13 01:48:15
0.0298	2015-12-13 01:48:26
0.0298	2015-12-13 01:48:37
0.0298	2015-12-13 01:48:48
0.0298	2015-12-13 01:48:59
0.0298	2015-12-13 01:49:10
0.0298	2015-12-13 01:49:21
0.0298	2015-12-13 01:49:32
0.0298	2015-12-13 01:49:43
0.0298	2015-12-13 01:49:54
0.0299	2015-12-13 01:50:05
0.0298	2015-12-13 01:50:16
0.0298	2015-12-13 01:50:27
0.0298	2015-12-13 01:50:38
0.0298	2015-12-13 01:50:49
0.0298	2015-12-13 01:51:00
0.0298	2015-12-13 01:51:11
0.0298	2015-12-13 01:51:22
0.0298	2015-12-13 01:51:33
0.0298	2015-12-13 01:51:44
0.0298	2015-12-13 01:51:55
0.0298	2015-12-13 01:52:06
0.0298	2015-12-13 01:52:17
0.0298	2015-12-13 01:52:28
0.0298	2015-12-13 01:52:39
0.0298	2015-12-13 01:52:50
0.0298	2015-12-13 01:53:01
0.0298	2015-12-13 01:53:12
0.0298	2015-12-13 01:53:23
0.0298	2015-12-13 01:53:34
0.0298	2015-12-13 01:53:45
0.0298	2015-12-13 01:53:56
0.0298	2015-12-13 01:54:07
0.0298	2015-12-13 01:54:18
0.0298	2015-12-13 01:54:29
0.0298	2015-12-13 01:54:40
0.0298	2015-12-13 01:54:51
0.0298	2015-12-13 01:55:02
0.0298	2015-12-13 01:55:13
0.0298	2015-12-13 01:55:24
0.0298	2015-12-13 01:55:35
0.0298	2015-12-13 01:55:46
0.0298	2015-12-13 01:55:57
0.0298	2015-12-13 01:56:08
0.0298	2015-12-13 01:56:19
0.0298	2015-12-13 01:56:30
0.0298	2015-12-13 01:56:41
0.0298	2015-12-13 01:56:52
0.0298	2015-12-13 01:57:03
0.0298	2015-12-13 01:57:14
0.0298	2015-12-13 01:57:25
0.0298	2015-12-13 01:57:36
0.0298	2015-12-13 01:57:47
0.0298	2015-12-13 01:57:58
0.0298	2015-12-13 01:58:09
0.0298	2015-12-13 01:58:20
0.0298	2015-12-13 01:58:31
0.0298	2015-12-13 01:58:42
0.0298	2015-12-13 01:58:53
0.0298	2015-12-13 01:59:04
0.0298	2015-12-13 01:59:15
0.0298	2015-12-13 01:59:26
0.0298	2015-12-13 01:59:37
0.0298	2015-12-13 01:59:48
0.0298	2015-12-13 01:59:59
0.0298	2015-12-13 02:00:10
0.0298	2015-12-13 02:00:21
0.0298	2015-12-13 02:00:32
0.0298	2015-12-13 02:00:43
0.0298	2015-12-13 02:00:54
0.0298	2015-12-13 02:01:05
0.0298	2015-12-13 02:01:16
0.0298	2015-12-13 02:01:27
0.0298	2015-12-13 02:01:38
0.0298	2015-12-13 02:01:49
0.0298	2015-12-13 02:02:00
0.0298	2015-12-13 02:02:11
0.0298	2015-12-13 02:02:22
0.0298	2015-12-13 02:02:33
0.0298	2015-12-13 02:02:44
0.0298	2015-12-13 02:02:55
0.0298	2015-12-13 02:03:06
0.0298	2015-12-13 02:03:17
0.0298	2015-12-13 02:03:28
0.0298	2015-12-13 02:03:39
0.0298	2015-12-13 02:03:50
0.0298	2015-12-13 02:04:01
0.0298	2015-12-13 02:04:12
0.0298	2015-12-13 02:04:23
0.0298	2015-12-13 02:04:34
0.0298	2015-12-13 02:04:45
0.0298	2015-12-13 02:04:56
0.0298	2015-12-13 02:05:07
0.0298	2015-12-13 02:05:18
0.0298	2015-12-13 02:05:29
0.0298	2015-12-13 02:05:40
0.0298	2015-12-13 02:05:51
0.0298	2015-12-13 02:06:02
0.0298	2015-12-13 02:06:13
0.0298	2015-12-13 02:06:24
0.0298	2015-12-13 02:06:35
0.0298	2015-12-13 02:06:46
0.0298	2015-12-13 02:06:57
0.0298	2015-12-13 02:07:08
0.0298	2015-12-13 02:07:19
0.0298	2015-12-13 02:07:30
0.0298	2015-12-13 02:07:41
0.0298	2015-12-13 02:07:52
0.0298	2015-12-13 02:08:03
0.0298	2015-12-13 02:08:14
0.0298	2015-12-13 02:08:25
0.0298	2015-12-13 02:08:36
0.0298	2015-12-13 02:08:47
0.0298	2015-12-13 02:08:58
0.0298	2015-12-13 02:09:09
0.0298	2015-12-13 02:09:20
0.0298	2015-12-13 02:09:31
0.0298	2015-12-13 02:09:42
0.0298	2015-12-13 02:09:53
0.0298	2015-12-13 02:10:04
0.0298	2015-12-13 02:10:15
0.0298	2015-12-13 02:10:26
0.0298	2015-12-13 02:10:37
0.0298	2015-12-13 02:10:48
0.0298	2015-12-13 02:10:59
0.0298	2015-12-13 02:11:10
0.0298	2015-12-13 02:11:21
0.0298	2015-12-13 02:11:32
0.0298	2015-12-13 02:11:43
0.0298	2015-12-13 02:11:54
0.0298	2015-12-13 02:12:05
0.0298	2015-12-13 02:12:16
0.0298	2015-12-13 02:12:27
0.0298	2015-12-13 02:12:38
0.0298	2015-12-13 02:12:49
0.0298	2015-12-13 02:13:00
0.0298	2015-12-13 02:13:11
0.0298	2015-12-13 02:13:22
0.0298	2015-12-13 02:13:33
0.0298	2015-12-13 02:13:44
0.0298	2015-12-13 02:13:55
0.0298	2015-12-13 02:14:06
0.0298	2015-12-13 02:14:17
0.0298	2015-12-13 02:14:28
0.0299	2015-12-13 02:14:39
0.0298	2015-12-13 02:14:50
0.0298	2015-12-13 02:15:01
0.0298	2015-12-13 02:15:12
0.0298	2015-12-13 02:15:23
0.0298	2015-12-13 02:15:34
0.0298	2015-12-13 02:15:45
0.0298	2015-12-13 02:15:56
0.0298	2015-12-13 02:16:07
0.0298	2015-12-13 02:16:18
0.0298	2015-12-13 02:16:29
0.0298	2015-12-13 02:16:40
0.0298	2015-12-13 02:16:51
0.0298	2015-12-13 02:17:02
0.0298	2015-12-13 02:17:13
0.0298	2015-12-13 02:17:24
0.0298	2015-12-13 02:17:35
0.0298	2015-12-13 02:17:46
0.0298	2015-12-13 02:17:57
0.0298	2015-12-13 02:18:08
0.0298	2015-12-13 02:18:19
0.0298	2015-12-13 02:18:30
0.0298	2015-12-13 02:18:41
0.0298	2015-12-13 02:18:52
0.0298	2015-12-13 02:19:03
0.0298	2015-12-13 02:19:14
0.0298	2015-12-13 02:19:25
0.0298	2015-12-13 02:19:36
0.0298	2015-12-13 02:19:47
0.0298	2015-12-13 02:19:58
0.0298	2015-12-13 02:20:09
0.0298	2015-12-13 02:20:20
0.0298	2015-12-13 02:20:31
0.0298	2015-12-13 02:20:42
0.0298	2015-12-13 02:20:53
0.0298	2015-12-13 02:21:04
0.0298	2015-12-13 02:21:15
0.0298	2015-12-13 02:21:26
0.0298	2015-12-13 02:21:37
0.0298	2015-12-13 02:21:48
0.0298	2015-12-13 02:21:59
0.0298	2015-12-13 02:22:10
0.0298	2015-12-13 02:22:21
0.0298	2015-12-13 02:22:32
0.0298	2015-12-13 02:22:43
0.0298	2015-12-13 02:22:54
0.0298	2015-12-13 02:23:05
0.0298	2015-12-13 02:23:16
0.0298	2015-12-13 02:23:27
0.0298	2015-12-13 02:23:38
0.0298	2015-12-13 02:23:49
0.0298	2015-12-13 02:24:00
0.0298	2015-12-13 02:24:11
0.0298	2015-12-13 02:24:22
0.0298	2015-12-13 02:24:33
0.0298	2015-12-13 02:24:44
0.0298	2015-12-13 02:24:55
0.0298	2015-12-13 02:25:06
0.0298	2015-12-13 02:25:17
0.0298	2015-12-13 02:25:28
0.0298	2015-12-13 02:25:39
0.0298	2015-12-13 02:25:50
0.0298	2015-12-13 02:26:01
0.0298	2015-12-13 02:26:12
0.0298	2015-12-13 02:26:23
0.0298	2015-12-13 02:26:34
0.0298	2015-12-13 02:26:45
0.0298	2015-12-13 02:26:56
0.0298	2015-12-13 02:27:07
0.0298	2015-12-13 02:27:18
0.0298	2015-12-13 02:27:29
0.0298	2015-12-13 02:27:40
0.0298	2015-12-13 02:27:51
0.0298	2015-12-13 02:28:02
0.0298	2015-12-13 02:28:13
0.0298	2015-12-13 02:28:24
0.0298	2015-12-13 02:28:35
0.0298	2015-12-13 02:28:46
0.0298	2015-12-13 02:28:57
0.0298	2015-12-13 02:29:08
0.0298	2015-12-13 02:29:19
0.0298	2015-12-13 02:29:30
0.0298	2015-12-13 02:29:41
0.0298	2015-12-13 02:29:52
0.0298	2015-12-13 02:30:03
0.0298	2015-12-13 02:30:14
0.0298	2015-12-13 02:30:25
0.0298	2015-12-13 02:30:36
0.0298	2015-12-13 02:30:47
0.0298	2015-12-13 02:30:58
0.0298	2015-12-13 02:31:09
0.0298	2015-12-13 02:31:20
0.0298	2015-12-13 02:31:31
0.0298	2015-12-13 02:31:42
0.0298	2015-12-13 02:31:53
0.0298	2015-12-13 02:32:04
0.0298	2015-12-13 02:32:15
0.0298	2015-12-13 02:32:26
0.0298	2015-12-13 02:32:37
0.0298	2015-12-13 02:32:48
0.0298	2015-12-13 02:32:59
0.0298	2015-12-13 02:33:10
0.0298	2015-12-13 02:33:21
0.0298	2015-12-13 02:33:32
0.0298	2015-12-13 02:33:43
0.0298	2015-12-13 02:33:54
0.0298	2015-12-13 02:34:05
0.0298	2015-12-13 02:34:16
0.0298	2015-12-13 02:34:27
0.0298	2015-12-13 02:34:38
0.0298	2015-12-13 02:34:49
0.0298	2015-12-13 02:35:00
0.0298	2015-12-13 02:35:11
0.0298	2015-12-13 02:35:22
0.0298	2015-12-13 02:35:33
0.0298	2015-12-13 02:35:44
0.0298	2015-12-13 02:35:55
0.0298	2015-12-13 02:36:06
0.0298	2015-12-13 02:36:17
0.0298	2015-12-13 02:36:28
0.0298	2015-12-13 02:36:39
0.0298	2015-12-13 02:36:50
0.0298	2015-12-13 02:37:01
0.0298	2015-12-13 02:37:12
0.0298	2015-12-13 02:37:23
0.0298	2015-12-13 02:37:34
0.0298	2015-12-13 02:37:45
0.0298	2015-12-13 02:37:56
0.0298	2015-12-13 02:38:07
0.0298	2015-12-13 02:38:18
0.0298	2015-12-13 02:38:29
0.0298	2015-12-13 02:38:40
0.0298	2015-12-13 02:38:51
0.0298	2015-12-13 02:39:02
0.0298	2015-12-13 02:39:13
0.0298	2015-12-13 02:39:24
0.0298	2015-12-13 02:39:35
0.0298	2015-12-13 02:39:46
0.0298	2015-12-13 02:39:57
0.0298	2015-12-13 02:40:08
0.0298	2015-12-13 02:40:19
0.0298	2015-12-13 02:40:30
0.0298	2015-12-13 02:40:41
0.0298	2015-12-13 02:40:52
0.0298	2015-12-13 02:41:03
0.0298	2015-12-13 02:41:14
0.0299	2015-12-13 02:41:25
0.0298	2015-12-13 02:41:36
0.0298	2015-12-13 02:41:47
0.0298	2015-12-13 02:41:58
0.0298	2015-12-13 02:42:09
0.0298	2015-12-13 02:42:20
0.0298	2015-12-13 02:42:31
0.0298	2015-12-13 02:42:42
0.0298	2015-12-13 02:42:53
0.0298	2015-12-13 02:43:04
0.0298	2015-12-13 02:43:15
0.0298	2015-12-13 02:43:26
0.0298	2015-12-13 02:43:37
0.0298	2015-12-13 02:43:48
0.0298	2015-12-13 02:43:59
0.0298	2015-12-13 02:44:10
0.0298	2015-12-13 02:44:21
0.0298	2015-12-13 02:44:32
0.0298	2015-12-13 02:44:43
0.0298	2015-12-13 02:44:54
0.0298	2015-12-13 02:45:05
0.0298	2015-12-13 02:45:16
0.0298	2015-12-13 02:45:27
0.0298	2015-12-13 02:45:38
0.0298	2015-12-13 02:45:49
0.0298	2015-12-13 02:46:00
0.0298	2015-12-13 02:46:11
0.0298	2015-12-13 02:46:22
0.0298	2015-12-13 02:46:33
0.0298	2015-12-13 02:46:44
0.0298	2015-12-13 02:46:55
0.0298	2015-12-13 02:47:06
0.0298	2015-12-13 02:47:17
0.0298	2015-12-13 02:47:28
0.0298	2015-12-13 02:47:39
0.0298	2015-12-13 02:47:50
0.0298	2015-12-13 02:48:01
0.0298	2015-12-13 02:48:12
0.0298	2015-12-13 02:48:23
0.0298	2015-12-13 02:48:34
0.0298	2015-12-13 02:48:45
0.0298	2015-12-13 02:48:56
0.0298	2015-12-13 02:49:07
0.0298	2015-12-13 02:49:18
0.0298	2015-12-13 02:49:29
0.0298	2015-12-13 02:49:40
0.0298	2015-12-13 02:49:51
0.0298	2015-12-13 02:50:02
0.0298	2015-12-13 02:50:13
0.0298	2015-12-13 02:50:24
0.0298	2015-12-13 02:50:35
0.0298	2015-12-13 02:50:46
0.0298	2015-12-13 02:50:57
0.0298	2015-12-13 02:51:08
0.0298	2015-12-13 02:51:19
0.0298	2015-12-13 02:51:30
0.0298	2015-12-13 02:51:41
0.0298	2015-12-13 02:51:52
0.0298	2015-12-13 02:52:03
0.0298	2015-12-13 02:52:14
0.0298	2015-12-13 02:52:25
0.0298	2015-12-13 02:52:36
0.0298	2015-12-13 02:52:47
0.0298	2015-12-13 02:52:58
0.0298	2015-12-13 02:53:09
0.0298	2015-12-13 02:53:20
0.0298	2015-12-13 02:53:31
0.0298	2015-12-13 02:53:42
0.0298	2015-12-13 02:53:53
0.0298	2015-12-13 02:54:04
0.0298	2015-12-13 02:54:15
0.0298	2015-12-13 02:54:26
0.0298	2015-12-13 02:54:37
0.0298	2015-12-13 02:54:48
0.0298	2015-12-13 02:54:59
0.0298	2015-12-13 02:55:10
0.0298	2015-12-13 02:55:21
0.0298	2015-12-13 02:55:32
0.0298	2015-12-13 02:55:43
0.0298	2015-12-13 02:55:54
0.0298	2015-12-13 02:56:05
0.0298	2015-12-13 02:56:16
0.0298	2015-12-13 02:56:27
0.0298	2015-12-13 02:56:38
0.0298	2015-12-13 02:56:49
0.0298	2015-12-13 02:57:00
0.0298	2015-12-13 02:57:11
0.0298	2015-12-13 02:57:22
0.0298	2015-12-13 02:57:33
0.0298	2015-12-13 02:57:44
0.0298	2015-12-13 02:57:55
0.0298	2015-12-13 02:58:06
0.0298	2015-12-13 02:58:17
0.0298	2015-12-13 02:58:28
0.0298	2015-12-13 02:58:39
0.0298	2015-12-13 02:58:50
0.0298	2015-12-13 02:59:01
0.0298	2015-12-13 02:59:12
0.0298	2015-12-13 02:59:23
0.0298	2015-12-13 02:59:34
0.0298	2015-12-13 02:59:45
0.0298	2015-12-13 02:59:56
0.0298	2015-12-13 03:00:07
0.0298	2015-12-13 03:00:18
0.0298	2015-12-13 03:00:29
0.0298	2015-12-13 03:00:40
0.0298	2015-12-13 03:00:51
0.0298	2015-12-13 03:01:02
0.0298	2015-12-13 03:01:13
0.0298	2015-12-13 03:01:24
0.0298	2015-12-13 03:01:35
0.0298	2015-12-13 03:01:46
0.0298	2015-12-13 03:01:57
0.0298	2015-12-13 03:02:08
0.0298	2015-12-13 03:02:19
0.0298	2015-12-13 03:02:30
0.0298	2015-12-13 03:02:41
0.0298	2015-12-13 03:02:52
0.0298	2015-12-13 03:03:03
0.0298	2015-12-13 03:03:14
0.0298	2015-12-13 03:03:25
0.0298	2015-12-13 03:03:36
0.0298	2015-12-13 03:03:47
0.0298	2015-12-13 03:03:58
0.0298	2015-12-13 03:04:09
0.0298	2015-12-13 03:04:20
0.0298	2015-12-13 03:04:31
0.0298	2015-12-13 03:04:42
0.0298	2015-12-13 03:04:53
0.0298	2015-12-13 03:05:04
0.0298	2015-12-13 03:05:15
0.0298	2015-12-13 03:05:26
0.0298	2015-12-13 03:05:37
0.0298	2015-12-13 03:05:48
0.0298	2015-12-13 03:05:59
0.0298	2015-12-13 03:06:10
0.0298	2015-12-13 03:06:21
0.0298	2015-12-13 03:06:32
0.0298	2015-12-13 03:06:43
0.0298	2015-12-13 03:06:54
0.0298	2015-12-13 03:07:05
0.0298	2015-12-13 03:07:16
0.0298	2015-12-13 03:07:27
0.0298	2015-12-13 03:07:38
0.0298	2015-12-13 03:07:49
0.0298	2015-12-13 03:08:00
0.0298	2015-12-13 03:08:11
0.0298	2015-12-13 03:08:22
0.0298	2015-12-13 03:08:33
0.0298	2015-12-13 03:08:44
0.0298	2015-12-13 03:08:55
0.0298	2015-12-13 03:09:06
0.0298	2015-12-13 03:09:17
0.0298	2015-12-13 03:09:28
0.0298	2015-12-13 03:09:39
0.0298	2015-12-13 03:09:50
0.0298	2015-12-13 03:10:01
0.0298	2015-12-13 03:10:12
0.0298	2015-12-13 03:10:23
0.0298	2015-12-13 03:10:34
0.0298	2015-12-13 03:10:45
0.0298	2015-12-13 03:10:56
0.0298	2015-12-13 03:11:07
0.0298	2015-12-13 03:11:18
0.0298	2015-12-13 03:11:29
0.0298	2015-12-13 03:11:40
0.0298	2015-12-13 03:11:51
0.0298	2015-12-13 03:12:02
0.0298	2015-12-13 03:12:13
0.0298	2015-12-13 03:12:24
0.0298	2015-12-13 03:12:35
0.0298	2015-12-13 03:12:46
0.0298	2015-12-13 03:12:57
0.0298	2015-12-13 03:13:08
0.0298	2015-12-13 03:13:19
0.0298	2015-12-13 03:13:30
0.0298	2015-12-13 03:13:41
0.0298	2015-12-13 03:13:52
0.0298	2015-12-13 03:14:03
0.0298	2015-12-13 03:14:14
0.0298	2015-12-13 03:14:25
0.0298	2015-12-13 03:14:36
0.0298	2015-12-13 03:14:47
0.0298	2015-12-13 03:14:58
0.0298	2015-12-13 03:15:09
0.0298	2015-12-13 03:15:20
0.0298	2015-12-13 03:15:31
0.0298	2015-12-13 03:15:42
0.0298	2015-12-13 03:15:53
0.0298	2015-12-13 03:16:04
0.0298	2015-12-13 03:16:15
0.0298	2015-12-13 03:16:26
0.0298	2015-12-13 03:16:37
0.0298	2015-12-13 03:16:48
0.0298	2015-12-13 03:16:59
0.0298	2015-12-13 03:17:10
0.0298	2015-12-13 03:17:21
0.0298	2015-12-13 03:17:32
0.0298	2015-12-13 03:17:43
0.0298	2015-12-13 03:17:54
0.0298	2015-12-13 03:18:05
0.0298	2015-12-13 03:18:16
0.0298	2015-12-13 03:18:27
0.0298	2015-12-13 03:18:38
0.0298	2015-12-13 03:18:49
0.0298	2015-12-13 03:19:00
0.0298	2015-12-13 03:19:11
0.0298	2015-12-13 03:19:22
0.0298	2015-12-13 03:19:33
0.0298	2015-12-13 03:19:44
0.0298	2015-12-13 03:19:55
0.0298	2015-12-13 03:20:06
0.0298	2015-12-13 03:20:17
0.0298	2015-12-13 03:20:28
0.0298	2015-12-13 03:20:39
0.0298	2015-12-13 03:20:50
0.0298	2015-12-13 03:21:01
0.0298	2015-12-13 03:21:12
0.0298	2015-12-13 03:21:23
0.0298	2015-12-13 03:21:34
0.0298	2015-12-13 03:21:45
0.0298	2015-12-13 03:21:56
0.0298	2015-12-13 03:22:07
0.0298	2015-12-13 03:22:18
0.0298	2015-12-13 03:22:29
0.0298	2015-12-13 03:22:40
0.0298	2015-12-13 03:22:51
0.0298	2015-12-13 03:23:02
0.0298	2015-12-13 03:23:13
0.0298	2015-12-13 03:23:24
0.0298	2015-12-13 03:23:35
0.0298	2015-12-13 03:23:46
0.0299	2015-12-13 03:23:57
0.0298	2015-12-13 03:24:08
0.0298	2015-12-13 03:24:19
0.0298	2015-12-13 03:24:30
0.0298	2015-12-13 03:24:41
0.0298	2015-12-13 03:24:52
0.0298	2015-12-13 03:25:03
0.0298	2015-12-13 03:25:14
0.0298	2015-12-13 03:25:25
0.0298	2015-12-13 03:25:36
0.0298	2015-12-13 03:25:47
0.0298	2015-12-13 03:25:58
0.0298	2015-12-13 03:26:09
0.0298	2015-12-13 03:26:20
0.0298	2015-12-13 03:26:31
0.0298	2015-12-13 03:26:42
0.0298	2015-12-13 03:26:53
0.0298	2015-12-13 03:27:04
0.0298	2015-12-13 03:27:15
0.0298	2015-12-13 03:27:26
0.0298	2015-12-13 03:27:37
0.0298	2015-12-13 03:27:48
0.0298	2015-12-13 03:27:59
0.0298	2015-12-13 03:28:10
0.0298	2015-12-13 03:28:21
0.0298	2015-12-13 03:28:32
0.0298	2015-12-13 03:28:43
0.0298	2015-12-13 03:28:54
0.0298	2015-12-13 03:29:05
0.0298	2015-12-13 03:29:16
0.0298	2015-12-13 03:29:27
0.0298	2015-12-13 03:29:38
0.0298	2015-12-13 03:29:49
0.0298	2015-12-13 03:30:00
0.0298	2015-12-13 03:30:11
0.0298	2015-12-13 03:30:22
0.0298	2015-12-13 03:30:33
0.0298	2015-12-13 03:30:44
0.0298	2015-12-13 03:30:55
0.0298	2015-12-13 03:31:06
0.0298	2015-12-13 03:31:17
0.0298	2015-12-13 03:31:28
0.0298	2015-12-13 03:31:39
0.0298	2015-12-13 03:31:50
0.0298	2015-12-13 03:32:01
0.0298	2015-12-13 03:32:12
0.0298	2015-12-13 03:32:23
0.0298	2015-12-13 03:32:34
0.0298	2015-12-13 03:32:45
0.0298	2015-12-13 03:32:56
0.0298	2015-12-13 03:33:07
0.0298	2015-12-13 03:33:18
0.0298	2015-12-13 03:33:29
0.0298	2015-12-13 03:33:40
0.0298	2015-12-13 03:33:51
0.0298	2015-12-13 03:34:02
0.0298	2015-12-13 03:34:13
0.0298	2015-12-13 03:34:24
0.0298	2015-12-13 03:34:35
0.0298	2015-12-13 03:34:46
0.0298	2015-12-13 03:34:57
0.0298	2015-12-13 03:35:08
0.0298	2015-12-13 03:35:19
0.0298	2015-12-13 03:35:30
0.0298	2015-12-13 03:35:41
0.0298	2015-12-13 03:35:52
0.0298	2015-12-13 03:36:03
0.0298	2015-12-13 03:36:14
0.0298	2015-12-13 03:36:25
0.0298	2015-12-13 03:36:36
0.0298	2015-12-13 03:36:47
0.0298	2015-12-13 03:36:58
0.0298	2015-12-13 03:37:09
0.0298	2015-12-13 03:37:20
0.0298	2015-12-13 03:37:31
0.0298	2015-12-13 03:37:42
0.0298	2015-12-13 03:37:53
0.0298	2015-12-13 03:38:04
0.0298	2015-12-13 03:38:15
0.0298	2015-12-13 03:38:26
0.0298	2015-12-13 03:38:37
0.0298	2015-12-13 03:38:48
0.0298	2015-12-13 03:38:59
0.0298	2015-12-13 03:39:10
0.0298	2015-12-13 03:39:21
0.0298	2015-12-13 03:39:32
0.0298	2015-12-13 03:39:43
0.0298	2015-12-13 03:39:54
0.0298	2015-12-13 03:40:05
0.0298	2015-12-13 03:40:16
0.0298	2015-12-13 03:40:27
0.0298	2015-12-13 03:40:38
0.0298	2015-12-13 03:40:49
0.0298	2015-12-13 03:41:00
0.0298	2015-12-13 03:41:11
0.0298	2015-12-13 03:41:22
0.0298	2015-12-13 03:41:33
0.0298	2015-12-13 03:41:44
0.0298	2015-12-13 03:41:55
0.0298	2015-12-13 03:42:06
0.0298	2015-12-13 03:42:17
0.0298	2015-12-13 03:42:28
0.0298	2015-12-13 03:42:39
0.0298	2015-12-13 03:42:50
0.0298	2015-12-13 03:43:01
0.0298	2015-12-13 03:43:12
0.0298	2015-12-13 03:43:23
0.0298	2015-12-13 03:43:34
0.0298	2015-12-13 03:43:45
0.0298	2015-12-13 03:43:56
0.0298	2015-12-13 03:44:07
0.0298	2015-12-13 03:44:18
0.0298	2015-12-13 03:44:29
0.0298	2015-12-13 03:44:40
0.0298	2015-12-13 03:44:51
0.0298	2015-12-13 03:45:02
0.0298	2015-12-13 03:45:13
0.0298	2015-12-13 03:45:24
0.0298	2015-12-13 03:45:35
0.0298	2015-12-13 03:45:46
0.0298	2015-12-13 03:45:57
0.0298	2015-12-13 03:46:08
0.0298	2015-12-13 03:46:19
0.0298	2015-12-13 03:46:30
0.0298	2015-12-13 03:46:41
0.0298	2015-12-13 03:46:52
0.0298	2015-12-13 03:47:03
0.0298	2015-12-13 03:47:14
0.0298	2015-12-13 03:47:25
0.0298	2015-12-13 03:47:36
0.0298	2015-12-13 03:47:47
0.0298	2015-12-13 03:47:58
0.0298	2015-12-13 03:48:09
0.0298	2015-12-13 03:48:20
0.0298	2015-12-13 03:48:31
0.0298	2015-12-13 03:48:42
0.0298	2015-12-13 03:48:53
0.0298	2015-12-13 03:49:04
0.0298	2015-12-13 03:49:15
0.0298	2015-12-13 03:49:26
0.0298	2015-12-13 03:49:37
0.0298	2015-12-13 03:49:48
0.0298	2015-12-13 03:49:59
0.0298	2015-12-13 03:50:10
0.0298	2015-12-13 03:50:21
0.0298	2015-12-13 03:50:32
0.0298	2015-12-13 03:50:43
0.0298	2015-12-13 03:50:54
0.0298	2015-12-13 03:51:05
0.0298	2015-12-13 03:51:16
0.0298	2015-12-13 03:51:27
0.0298	2015-12-13 03:51:38
0.0298	2015-12-13 03:51:49
0.0298	2015-12-13 03:52:00
0.0298	2015-12-13 03:52:11
0.0298	2015-12-13 03:52:22
0.0298	2015-12-13 03:52:33
0.0298	2015-12-13 03:52:44
0.0298	2015-12-13 03:52:55
0.0298	2015-12-13 03:53:06
0.0298	2015-12-13 03:53:17
0.0298	2015-12-13 03:53:28
0.0298	2015-12-13 03:53:39
0.0298	2015-12-13 03:53:50
0.0298	2015-12-13 03:54:01
0.0298	2015-12-13 03:54:12
0.0298	2015-12-13 03:54:23
0.0298	2015-12-13 03:54:34
0.0298	2015-12-13 03:54:45
0.0298	2015-12-13 03:54:56
0.0298	2015-12-13 03:55:07
0.0298	2015-12-13 03:55:18
0.0298	2015-12-13 03:55:29
0.0298	2015-12-13 03:55:40
0.0298	2015-12-13 03:55:51
0.0298	2015-12-13 03:56:02
0.0298	2015-12-13 03:56:13
0.0298	2015-12-13 03:56:24
0.0298	2015-12-13 03:56:35
0.0298	2015-12-13 03:56:46
0.0298	2015-12-13 03:56:57
0.0298	2015-12-13 03:57:08
0.0298	2015-12-13 03:57:19
0.0298	2015-12-13 03:57:30
0.0298	2015-12-13 03:57:41
0.0298	2015-12-13 03:57:52
0.0298	2015-12-13 03:58:03
0.0298	2015-12-13 03:58:14
0.0298	2015-12-13 03:58:25
0.0298	2015-12-13 03:58:36
0.0298	2015-12-13 03:58:47
0.0298	2015-12-13 03:58:58
0.0298	2015-12-13 03:59:09
0.0298	2015-12-13 03:59:20
0.0298	2015-12-13 03:59:31
0.0298	2015-12-13 03:59:42
0.0298	2015-12-13 03:59:53
0.0298	2015-12-13 04:00:04
0.0298	2015-12-13 04:00:15
0.0298	2015-12-13 04:00:26
0.0298	2015-12-13 04:00:37
0.0298	2015-12-13 04:00:48
0.0298	2015-12-13 04:00:59
0.0298	2015-12-13 04:01:10
0.0298	2015-12-13 04:01:21
0.0298	2015-12-13 04:01:32
0.0298	2015-12-13 04:01:43
0.0298	2015-12-13 04:01:54
0.0298	2015-12-13 04:02:05
0.0298	2015-12-13 04:02:16
0.0298	2015-12-13 04:02:27
0.0298	2015-12-13 04:02:38
0.0298	2015-12-13 04:02:49
0.0298	2015-12-13 04:03:00
0.0298	2015-12-13 04:03:11
0.0298	2015-12-13 04:03:22
0.0298	2015-12-13 04:03:33
0.0298	2015-12-13 04:03:44
0.0298	2015-12-13 04:03:55
0.0298	2015-12-13 04:04:06
0.0298	2015-12-13 04:04:17
0.0298	2015-12-13 04:04:28
0.0298	2015-12-13 04:04:39
0.0298	2015-12-13 04:04:50
0.0298	2015-12-13 04:05:01
0.0298	2015-12-13 04:05:12
0.0298	2015-12-13 04:05:23
0.0298	2015-12-13 04:05:34
0.0298	2015-12-13 04:05:45
0.0298	2015-12-13 04:05:56
0.0298	2015-12-13 04:06:07
0.0298	2015-12-13 04:06:18
0.0298	2015-12-13 04:06:29
0.0298	2015-12-13 04:06:40
0.0298	2015-12-13 04:06:51
0.0298	2015-12-13 04:07:02
0.0298	2015-12-13 04:07:13
0.0298	2015-12-13 04:07:24
0.0298	2015-12-13 04:07:35
0.0298	2015-12-13 04:07:46
0.0298	2015-12-13 04:07:57
0.0298	2015-12-13 04:08:08
0.0298	2015-12-13 04:08:19
0.0298	2015-12-13 04:08:30
0.0298	2015-12-13 04:08:41
0.0298	2015-12-13 04:08:52
0.0298	2015-12-13 04:09:03
0.0298	2015-12-13 04:09:14
0.0298	2015-12-13 04:09:25
0.0298	2015-12-13 04:09:36
0.0298	2015-12-13 04:09:47
0.0298	2015-12-13 04:09:58
0.0298	2015-12-13 04:10:09
0.0298	2015-12-13 04:10:20
0.0298	2015-12-13 04:10:31
0.0298	2015-12-13 04:10:42
0.0298	2015-12-13 04:10:53
0.0298	2015-12-13 04:11:04
0.0298	2015-12-13 04:11:15
0.0298	2015-12-13 04:11:26
0.0298	2015-12-13 04:11:37
0.0298	2015-12-13 04:11:48
0.0298	2015-12-13 04:11:59
0.0298	2015-12-13 04:12:10
0.0298	2015-12-13 04:12:21
0.0298	2015-12-13 04:12:32
0.0298	2015-12-13 04:12:43
0.0298	2015-12-13 04:12:54
0.0298	2015-12-13 04:13:05
0.0298	2015-12-13 04:13:16
0.0298	2015-12-13 04:13:27
0.0298	2015-12-13 04:13:38
0.0298	2015-12-13 04:13:49
0.0298	2015-12-13 04:14:00
0.0298	2015-12-13 04:14:11
0.0298	2015-12-13 04:14:22
0.0298	2015-12-13 04:14:33
0.0298	2015-12-13 04:14:44
0.0298	2015-12-13 04:14:55
0.0298	2015-12-13 04:15:06
0.0298	2015-12-13 04:15:17
0.0298	2015-12-13 04:15:28
0.0298	2015-12-13 04:15:39
0.0298	2015-12-13 04:15:50
0.0298	2015-12-13 04:16:01
0.0298	2015-12-13 04:16:12
0.0298	2015-12-13 04:16:23
0.0298	2015-12-13 04:16:34
0.0298	2015-12-13 04:16:45
0.0298	2015-12-13 04:16:56
0.0298	2015-12-13 04:17:07
0.0298	2015-12-13 04:17:18
0.0298	2015-12-13 04:17:29
0.0298	2015-12-13 04:17:40
0.0298	2015-12-13 04:17:51
0.0298	2015-12-13 04:18:02
0.0298	2015-12-13 04:18:13
0.0298	2015-12-13 04:18:24
0.0298	2015-12-13 04:18:35
0.0298	2015-12-13 04:18:46
0.0298	2015-12-13 04:18:57
0.0298	2015-12-13 04:19:08
0.0298	2015-12-13 04:19:19
0.0298	2015-12-13 04:19:30
0.0298	2015-12-13 04:19:41
0.0298	2015-12-13 04:19:52
0.0298	2015-12-13 04:20:03
0.0298	2015-12-13 04:20:14
0.0298	2015-12-13 04:20:25
0.0298	2015-12-13 04:20:36
0.0298	2015-12-13 04:20:47
0.0298	2015-12-13 04:20:58
0.0298	2015-12-13 04:21:09
0.0298	2015-12-13 04:21:20
0.0298	2015-12-13 04:21:31
0.0298	2015-12-13 04:21:42
0.0298	2015-12-13 04:21:53
0.0298	2015-12-13 04:22:04
0.0298	2015-12-13 04:22:15
0.0298	2015-12-13 04:22:26
0.0298	2015-12-13 04:22:37
0.0298	2015-12-13 04:22:48
0.0298	2015-12-13 04:22:59
0.0298	2015-12-13 04:23:10
0.0298	2015-12-13 04:23:21
0.0298	2015-12-13 04:23:32
0.0298	2015-12-13 04:23:43
0.0298	2015-12-13 04:23:54
0.0298	2015-12-13 04:24:05
0.0298	2015-12-13 04:24:16
0.0298	2015-12-13 04:24:27
0.0298	2015-12-13 04:24:38
0.0298	2015-12-13 04:24:49
0.0298	2015-12-13 04:25:00
0.0298	2015-12-13 04:25:11
0.0298	2015-12-13 04:25:22
0.0298	2015-12-13 04:25:33
0.0298	2015-12-13 04:25:44
0.0298	2015-12-13 04:25:55
0.0298	2015-12-13 04:26:06
0.0298	2015-12-13 04:26:17
0.0298	2015-12-13 04:26:28
0.0298	2015-12-13 04:26:39
0.0298	2015-12-13 04:26:50
0.0298	2015-12-13 04:27:01
0.0298	2015-12-13 04:27:12
0.0298	2015-12-13 04:27:23
0.0298	2015-12-13 04:27:34
0.0298	2015-12-13 04:27:45
0.0298	2015-12-13 04:27:56
0.0298	2015-12-13 04:28:07
0.0298	2015-12-13 04:28:18
0.0298	2015-12-13 04:28:29
0.0298	2015-12-13 04:28:40
0.0298	2015-12-13 04:28:51
0.0298	2015-12-13 04:29:02
0.0298	2015-12-13 04:29:13
0.0298	2015-12-13 04:29:24
0.0298	2015-12-13 04:29:35
0.0298	2015-12-13 04:29:46
0.0298	2015-12-13 04:29:57
0.0298	2015-12-13 04:30:08
0.0298	2015-12-13 04:30:19
0.0298	2015-12-13 04:30:30
0.0298	2015-12-13 04:30:41
0.0298	2015-12-13 04:30:52
0.0298	2015-12-13 04:31:03
0.0298	2015-12-13 04:31:14
0.0298	2015-12-13 04:31:25
0.0298	2015-12-13 04:31:36
0.0298	2015-12-13 04:31:47
0.0298	2015-12-13 04:31:58
0.0298	2015-12-13 04:32:09
0.0298	2015-12-13 04:32:20
0.0298	2015-12-13 04:32:31
0.0298	2015-12-13 04:32:42
0.0298	2015-12-13 04:32:53
0.0298	2015-12-13 04:33:04
0.0298	2015-12-13 04:33:15
0.0298	2015-12-13 04:33:26
0.0298	2015-12-13 04:33:37
0.0298	2015-12-13 04:33:48
0.0298	2015-12-13 04:33:59
0.0298	2015-12-13 04:34:10
0.0298	2015-12-13 04:34:21
0.0298	2015-12-13 04:34:32
0.0298	2015-12-13 04:34:43
0.0298	2015-12-13 04:34:54
0.0298	2015-12-13 04:35:05
0.0298	2015-12-13 04:35:16
0.0298	2015-12-13 04:35:27
0.0298	2015-12-13 04:35:38
0.0298	2015-12-13 04:35:49
0.0298	2015-12-13 04:36:00
0.0298	2015-12-13 04:36:11
0.0298	2015-12-13 04:36:22
0.0298	2015-12-13 04:36:33
0.0298	2015-12-13 04:36:44
0.0298	2015-12-13 04:36:55
0.0298	2015-12-13 04:37:06
0.0298	2015-12-13 04:37:17
0.0298	2015-12-13 04:37:28
0.0298	2015-12-13 04:37:39
0.0298	2015-12-13 04:37:50
0.0298	2015-12-13 04:38:01
0.0298	2015-12-13 04:38:12
0.0298	2015-12-13 04:38:23
0.0298	2015-12-13 04:38:34
0.0298	2015-12-13 04:38:45
0.0298	2015-12-13 04:38:56
0.0298	2015-12-13 04:39:07
0.0298	2015-12-13 04:39:18
0.0298	2015-12-13 04:39:29
0.0298	2015-12-13 04:39:40
0.0298	2015-12-13 04:39:51
0.0298	2015-12-13 04:40:02
0.0298	2015-12-13 04:40:13
0.0298	2015-12-13 04:40:24
0.0298	2015-12-13 04:40:35
0.0298	2015-12-13 04:40:46
0.0298	2015-12-13 04:40:57
0.0298	2015-12-13 04:41:08
0.0298	2015-12-13 04:41:19
0.0298	2015-12-13 04:41:30
0.0298	2015-12-13 04:41:41
0.0298	2015-12-13 04:41:52
0.0298	2015-12-13 04:42:03
0.0298	2015-12-13 04:42:14
0.0298	2015-12-13 04:42:25
0.0298	2015-12-13 04:42:36
0.0298	2015-12-13 04:42:47
0.0298	2015-12-13 04:42:58
0.0298	2015-12-13 04:43:09
0.0298	2015-12-13 04:43:20
0.0298	2015-12-13 04:43:31
0.0298	2015-12-13 04:43:42
0.0298	2015-12-13 04:43:53
0.0298	2015-12-13 04:44:04
0.0298	2015-12-13 04:44:15
0.0298	2015-12-13 04:44:26
0.0298	2015-12-13 04:44:37
0.0298	2015-12-13 04:44:48
0.0298	2015-12-13 04:44:59
0.0298	2015-12-13 04:45:10
0.0298	2015-12-13 04:45:21
0.0298	2015-12-13 04:45:32
0.0298	2015-12-13 04:45:43
0.0298	2015-12-13 04:45:54
0.0298	2015-12-13 04:46:05
0.0298	2015-12-13 04:46:16
0.0298	2015-12-13 04:46:27
0.0298	2015-12-13 04:46:38
0.0298	2015-12-13 04:46:49
0.0298	2015-12-13 04:47:00
0.0298	2015-12-13 04:47:11
0.0298	2015-12-13 04:47:22
0.0298	2015-12-13 04:47:33
0.0298	2015-12-13 04:47:44
0.0298	2015-12-13 04:47:55
0.0298	2015-12-13 04:48:06
0.0298	2015-12-13 04:48:17
0.0298	2015-12-13 04:48:28
0.0298	2015-12-13 04:48:39
0.0298	2015-12-13 04:48:50
0.0298	2015-12-13 04:49:01
0.0298	2015-12-13 04:49:12
0.0298	2015-12-13 04:49:23
0.0298	2015-12-13 04:49:34
0.0298	2015-12-13 04:49:45
0.0298	2015-12-13 04:49:56
0.0298	2015-12-13 04:50:07
0.0298	2015-12-13 04:50:18
0.0298	2015-12-13 04:50:29
0.0298	2015-12-13 04:50:40
0.0298	2015-12-13 04:50:51
0.0298	2015-12-13 04:51:02
0.0298	2015-12-13 04:51:13
0.0298	2015-12-13 04:51:24
0.0298	2015-12-13 04:51:35
0.0298	2015-12-13 04:51:46
0.0298	2015-12-13 04:51:57
0.0298	2015-12-13 04:52:08
0.0298	2015-12-13 04:52:19
0.0298	2015-12-13 04:52:30
0.0298	2015-12-13 04:52:41
0.0298	2015-12-13 04:52:52
0.0298	2015-12-13 04:53:03
0.0298	2015-12-13 04:53:14
0.0298	2015-12-13 04:53:25
0.0298	2015-12-13 04:53:36
0.0298	2015-12-13 04:53:47
0.0298	2015-12-13 04:53:58
0.0298	2015-12-13 04:54:09
0.0298	2015-12-13 04:54:20
0.0298	2015-12-13 04:54:31
0.0298	2015-12-13 04:54:42
0.0298	2015-12-13 04:54:53
0.0298	2015-12-13 04:55:04
0.0298	2015-12-13 04:55:15
0.0298	2015-12-13 04:55:26
0.0298	2015-12-13 04:55:37
0.0298	2015-12-13 04:55:48
0.0298	2015-12-13 04:55:59
0.0298	2015-12-13 04:56:10
0.0298	2015-12-13 04:56:21
0.0298	2015-12-13 04:56:32
0.0298	2015-12-13 04:56:43
0.0298	2015-12-13 04:56:54
0.0298	2015-12-13 04:57:05
0.0298	2015-12-13 04:57:16
0.0298	2015-12-13 04:57:27
0.0298	2015-12-13 04:57:38
0.0298	2015-12-13 04:57:49
0.0298	2015-12-13 04:58:00
0.0298	2015-12-13 04:58:11
0.0298	2015-12-13 04:58:22
0.0298	2015-12-13 04:58:33
0.0298	2015-12-13 04:58:44
0.0298	2015-12-13 04:58:55
0.0298	2015-12-13 04:59:06
0.0298	2015-12-13 04:59:17
0.0298	2015-12-13 04:59:28
0.0298	2015-12-13 04:59:39
0.0298	2015-12-13 04:59:50
0.0298	2015-12-13 05:00:01
0.0298	2015-12-13 05:00:12
0.0298	2015-12-13 05:00:23
0.0298	2015-12-13 05:00:34
0.0298	2015-12-13 05:00:45
0.0298	2015-12-13 05:00:56
0.0298	2015-12-13 05:01:07
0.0298	2015-12-13 05:01:18
0.0298	2015-12-13 05:01:29
0.0298	2015-12-13 05:01:40
0.0298	2015-12-13 05:01:51
0.0298	2015-12-13 05:02:02
0.0298	2015-12-13 05:02:13
0.0298	2015-12-13 05:02:24
0.0298	2015-12-13 05:02:35
0.0298	2015-12-13 05:02:46
0.0298	2015-12-13 05:02:57
0.0298	2015-12-13 05:03:08
0.0298	2015-12-13 05:03:19
0.0298	2015-12-13 05:03:30
0.0298	2015-12-13 05:03:41
0.0298	2015-12-13 05:03:52
0.0298	2015-12-13 05:04:03
0.0298	2015-12-13 05:04:14
0.0298	2015-12-13 05:04:25
0.0298	2015-12-13 05:04:36
0.0298	2015-12-13 05:04:47
0.0298	2015-12-13 05:04:58
0.0298	2015-12-13 05:05:09
0.0298	2015-12-13 05:05:20
0.0298	2015-12-13 05:05:31
0.0298	2015-12-13 05:05:42
0.0298	2015-12-13 05:05:53
0.0298	2015-12-13 05:06:04
0.0298	2015-12-13 05:06:15
0.0298	2015-12-13 05:06:26
0.0298	2015-12-13 05:06:37
0.0298	2015-12-13 05:06:48
0.0298	2015-12-13 05:06:59
0.0298	2015-12-13 05:07:10
0.0298	2015-12-13 05:07:21
0.0298	2015-12-13 05:07:32
0.0298	2015-12-13 05:07:43
0.0298	2015-12-13 05:07:54
0.0298	2015-12-13 05:08:05
0.0298	2015-12-13 05:08:16
0.0298	2015-12-13 05:08:27
0.0298	2015-12-13 05:08:38
0.0298	2015-12-13 05:08:49
0.0298	2015-12-13 05:09:00
0.0298	2015-12-13 05:09:11
0.0298	2015-12-13 05:09:22
0.0298	2015-12-13 05:09:33
0.0298	2015-12-13 05:09:44
0.0298	2015-12-13 05:09:55
0.0298	2015-12-13 05:10:06
0.0298	2015-12-13 05:10:17
0.0298	2015-12-13 05:10:28
0.0298	2015-12-13 05:10:39
0.0298	2015-12-13 05:10:50
0.0298	2015-12-13 05:11:01
0.0298	2015-12-13 05:11:12
0.0298	2015-12-13 05:11:23
0.0298	2015-12-13 05:11:34
0.0298	2015-12-13 05:11:45
0.0298	2015-12-13 05:11:56
0.0298	2015-12-13 05:12:07
0.0298	2015-12-13 05:12:18
0.0298	2015-12-13 05:12:29
0.0298	2015-12-13 05:12:40
0.0298	2015-12-13 05:12:51
0.0298	2015-12-13 05:13:02
0.0298	2015-12-13 05:13:13
0.0298	2015-12-13 05:13:24
0.0298	2015-12-13 05:13:35
0.0298	2015-12-13 05:13:46
0.0298	2015-12-13 05:13:57
0.0298	2015-12-13 05:14:08
0.0298	2015-12-13 05:14:19
0.0298	2015-12-13 05:14:30
0.0298	2015-12-13 05:14:41
0.0298	2015-12-13 05:14:52
0.0298	2015-12-13 05:15:03
0.0298	2015-12-13 05:15:14
0.0298	2015-12-13 05:15:25
0.0298	2015-12-13 05:15:36
0.0298	2015-12-13 05:15:47
0.0298	2015-12-13 05:15:58
0.0298	2015-12-13 05:16:09
0.0298	2015-12-13 05:16:20
0.0298	2015-12-13 05:16:31
0.0298	2015-12-13 05:16:42
0.0298	2015-12-13 05:16:53
0.0298	2015-12-13 05:17:04
0.0298	2015-12-13 05:17:15
0.0298	2015-12-13 05:17:26
0.0298	2015-12-13 05:17:37
0.0298	2015-12-13 05:17:48
0.0298	2015-12-13 05:17:59
0.0298	2015-12-13 05:18:10
0.0298	2015-12-13 05:18:21
0.0298	2015-12-13 05:18:32
0.0298	2015-12-13 05:18:43
0.0298	2015-12-13 05:18:54
0.0298	2015-12-13 05:19:05
0.0298	2015-12-13 05:19:16
0.0298	2015-12-13 05:19:27
0.0298	2015-12-13 05:19:38
0.0298	2015-12-13 05:19:49
0.0298	2015-12-13 05:20:00
0.0298	2015-12-13 05:20:11
0.0298	2015-12-13 05:20:22
0.0298	2015-12-13 05:20:33
0.0298	2015-12-13 05:20:44
0.0298	2015-12-13 05:20:55
0.0298	2015-12-13 05:21:06
0.0298	2015-12-13 05:21:17
0.0298	2015-12-13 05:21:28
0.0298	2015-12-13 05:21:39
0.0298	2015-12-13 05:21:50
0.0298	2015-12-13 05:22:01
0.0298	2015-12-13 05:22:12
0.0298	2015-12-13 05:22:23
0.0298	2015-12-13 05:22:34
0.0298	2015-12-13 05:22:45
0.0298	2015-12-13 05:22:56
0.0298	2015-12-13 05:23:07
0.0298	2015-12-13 05:23:18
0.0298	2015-12-13 05:23:29
0.0298	2015-12-13 05:23:40
0.0298	2015-12-13 05:23:51
0.0298	2015-12-13 05:24:02
0.0298	2015-12-13 05:24:13
0.0298	2015-12-13 05:24:24
0.0298	2015-12-13 05:24:35
0.0298	2015-12-13 05:24:46
0.0298	2015-12-13 05:24:57
0.0298	2015-12-13 05:25:08
0.0298	2015-12-13 05:25:19
0.0298	2015-12-13 05:25:30
0.0298	2015-12-13 05:25:41
0.0298	2015-12-13 05:25:52
0.0298	2015-12-13 05:26:03
0.0298	2015-12-13 05:26:14
0.0298	2015-12-13 05:26:25
0.0298	2015-12-13 05:26:36
0.0298	2015-12-13 05:26:47
0.0298	2015-12-13 05:26:58
0.0298	2015-12-13 05:27:09
0.0298	2015-12-13 05:27:20
0.0298	2015-12-13 05:27:31
0.0298	2015-12-13 05:27:42
0.0298	2015-12-13 05:27:53
0.0298	2015-12-13 05:28:04
0.0298	2015-12-13 05:28:15
0.0298	2015-12-13 05:28:26
0.0298	2015-12-13 05:28:37
0.0298	2015-12-13 05:28:48
0.0298	2015-12-13 05:28:59
0.0298	2015-12-13 05:29:10
0.0298	2015-12-13 05:29:21
0.0298	2015-12-13 05:29:32
0.0298	2015-12-13 05:29:43
0.0298	2015-12-13 05:29:54
0.0298	2015-12-13 05:30:05
0.0298	2015-12-13 05:30:16
0.0298	2015-12-13 05:30:27
0.0298	2015-12-13 05:30:38
0.0298	2015-12-13 05:30:49
0.0298	2015-12-13 05:31:00
0.0298	2015-12-13 05:31:11
0.0298	2015-12-13 05:31:22
0.0298	2015-12-13 05:31:33
0.0298	2015-12-13 05:31:44
0.0298	2015-12-13 05:31:55
0.0298	2015-12-13 05:32:06
0.0298	2015-12-13 05:32:17
0.0298	2015-12-13 05:32:28
0.0298	2015-12-13 05:32:39
0.0298	2015-12-13 05:32:50
0.0298	2015-12-13 05:33:01
0.0298	2015-12-13 05:33:12
0.0298	2015-12-13 05:33:22
0.0298	2015-12-13 05:33:33
0.0298	2015-12-13 05:33:44
0.0298	2015-12-13 05:33:55
0.0298	2015-12-13 05:34:06
0.0298	2015-12-13 05:34:17
0.0298	2015-12-13 05:34:28
0.0298	2015-12-13 05:34:39
0.0298	2015-12-13 05:34:50
0.0298	2015-12-13 05:35:01
0.0298	2015-12-13 05:35:12
0.0298	2015-12-13 05:35:23
0.0298	2015-12-13 05:35:34
0.0298	2015-12-13 05:35:45
0.0298	2015-12-13 05:35:56
0.0298	2015-12-13 05:36:07
0.0298	2015-12-13 05:36:18
0.0298	2015-12-13 05:36:29
0.0298	2015-12-13 05:36:40
0.0298	2015-12-13 05:36:51
0.0298	2015-12-13 05:37:02
0.0298	2015-12-13 05:37:13
0.0298	2015-12-13 05:37:24
0.0298	2015-12-13 05:37:35
0.0298	2015-12-13 05:37:46
0.0298	2015-12-13 05:37:57
0.0298	2015-12-13 05:38:08
0.0298	2015-12-13 05:38:19
0.0298	2015-12-13 05:38:30
0.0298	2015-12-13 05:38:41
0.0298	2015-12-13 05:38:52
0.0298	2015-12-13 05:39:03
0.0298	2015-12-13 05:39:14
0.0298	2015-12-13 05:39:25
0.0298	2015-12-13 05:39:36
0.0298	2015-12-13 05:39:47
0.0298	2015-12-13 05:39:58
0.0298	2015-12-13 05:40:09
0.0298	2015-12-13 05:40:20
0.0298	2015-12-13 05:40:31
0.0298	2015-12-13 05:40:42
0.0298	2015-12-13 05:40:53
0.0298	2015-12-13 05:41:04
0.0298	2015-12-13 05:41:15
0.0298	2015-12-13 05:41:26
0.0298	2015-12-13 05:41:37
0.0298	2015-12-13 05:41:48
0.0298	2015-12-13 05:41:59
0.0298	2015-12-13 05:42:10
0.0298	2015-12-13 05:42:21
0.0298	2015-12-13 05:42:32
0.0298	2015-12-13 05:42:43
0.0298	2015-12-13 05:42:54
0.0298	2015-12-13 05:43:05
0.0298	2015-12-13 05:43:16
0.0298	2015-12-13 05:43:27
0.0298	2015-12-13 05:43:38
0.0298	2015-12-13 05:43:49
0.0298	2015-12-13 05:44:00
0.0298	2015-12-13 05:44:11
0.0298	2015-12-13 05:44:22
0.0298	2015-12-13 05:44:33
0.0298	2015-12-13 05:44:44
0.0298	2015-12-13 05:44:55
0.0298	2015-12-13 05:45:06
0.0298	2015-12-13 05:45:17
0.0298	2015-12-13 05:45:28
0.0298	2015-12-13 05:45:39
0.0298	2015-12-13 05:45:50
0.0298	2015-12-13 05:46:01
0.0298	2015-12-13 05:46:12
0.0298	2015-12-13 05:46:23
0.0298	2015-12-13 05:46:34
0.0298	2015-12-13 05:46:45
0.0298	2015-12-13 05:46:56
0.0298	2015-12-13 05:47:07
0.0298	2015-12-13 05:47:18
0.0298	2015-12-13 05:47:29
0.0298	2015-12-13 05:47:40
0.0298	2015-12-13 05:47:51
0.0298	2015-12-13 05:48:02
0.0298	2015-12-13 05:48:13
0.0298	2015-12-13 05:48:24
0.0298	2015-12-13 05:48:35
0.0298	2015-12-13 05:48:46
0.0298	2015-12-13 05:48:57
0.0298	2015-12-13 05:49:08
0.0298	2015-12-13 05:49:19
0.0298	2015-12-13 05:49:30
0.0298	2015-12-13 05:49:41
0.0298	2015-12-13 05:49:52
0.0298	2015-12-13 05:50:03
0.0298	2015-12-13 05:50:14
0.0298	2015-12-13 05:50:25
0.0298	2015-12-13 05:50:36
0.0298	2015-12-13 05:50:47
0.0298	2015-12-13 05:50:58
0.0298	2015-12-13 05:51:09
0.0298	2015-12-13 05:51:20
0.0298	2015-12-13 05:51:31
0.0298	2015-12-13 05:51:42
0.0298	2015-12-13 05:51:53
0.0298	2015-12-13 05:52:04
0.0298	2015-12-13 05:52:15
0.0298	2015-12-13 05:52:26
0.0298	2015-12-13 05:52:37
0.0298	2015-12-13 05:52:48
0.0298	2015-12-13 05:52:59
0.0298	2015-12-13 05:53:10
0.0298	2015-12-13 05:53:21
0.0298	2015-12-13 05:53:32
0.0298	2015-12-13 05:53:43
0.0298	2015-12-13 05:53:54
0.0298	2015-12-13 05:54:05
0.0298	2015-12-13 05:54:16
0.0298	2015-12-13 05:54:27
0.0298	2015-12-13 05:54:38
0.0298	2015-12-13 05:54:49
0.0298	2015-12-13 05:55:00
0.0298	2015-12-13 05:55:11
0.0298	2015-12-13 05:55:22
0.0298	2015-12-13 05:55:33
0.0298	2015-12-13 05:55:44
0.0298	2015-12-13 05:55:55
0.0298	2015-12-13 05:56:06
0.0298	2015-12-13 05:56:17
0.0298	2015-12-13 05:56:28
0.0298	2015-12-13 05:56:39
0.0298	2015-12-13 05:56:50
0.0298	2015-12-13 05:57:01
0.0298	2015-12-13 05:57:12
0.0298	2015-12-13 05:57:23
0.0298	2015-12-13 05:57:34
0.0298	2015-12-13 05:57:45
0.0298	2015-12-13 05:57:56
0.0298	2015-12-13 05:58:07
0.0298	2015-12-13 05:58:18
0.0298	2015-12-13 05:58:29
0.0298	2015-12-13 05:58:40
0.0298	2015-12-13 05:58:51
0.0298	2015-12-13 05:59:02
0.0298	2015-12-13 05:59:13
0.0298	2015-12-13 05:59:24
0.0298	2015-12-13 05:59:35
0.0298	2015-12-13 05:59:46
0.0298	2015-12-13 05:59:57
0.0298	2015-12-13 06:00:08
0.0298	2015-12-13 06:00:19
0.0298	2015-12-13 06:00:30
0.0298	2015-12-13 06:00:41
0.0298	2015-12-13 06:00:52
0.0298	2015-12-13 06:01:03
0.0298	2015-12-13 06:01:14
0.0298	2015-12-13 06:01:25
0.0298	2015-12-13 06:01:36
0.0298	2015-12-13 06:01:47
0.0298	2015-12-13 06:01:58
0.0298	2015-12-13 06:02:09
0.0298	2015-12-13 06:02:20
0.0298	2015-12-13 06:02:31
0.0298	2015-12-13 06:02:42
0.0298	2015-12-13 06:02:53
0.0298	2015-12-13 06:03:04
0.0298	2015-12-13 06:03:15
0.0298	2015-12-13 06:03:26
0.0298	2015-12-13 06:03:37
0.0298	2015-12-13 06:03:48
0.0298	2015-12-13 06:03:59
0.0298	2015-12-13 06:04:10
0.0298	2015-12-13 06:04:21
0.0298	2015-12-13 06:04:32
0.0298	2015-12-13 06:04:43
0.0298	2015-12-13 06:04:54
0.0298	2015-12-13 06:05:05
0.0298	2015-12-13 06:05:16
0.0298	2015-12-13 06:05:27
0.0298	2015-12-13 06:05:38
0.0298	2015-12-13 06:05:49
0.0298	2015-12-13 06:06:00
0.0298	2015-12-13 06:06:11
0.0298	2015-12-13 06:06:22
[truncated: 52,985 more rows]

## Sheet: CPC_total
Total particle number concentration [cm-3]	Date and time
7773.63	2015-12-13
7829.88	2015-12-13 00:00:10
8337.79	2015-12-13 00:00:20
8605.18	2015-12-13 00:00:30
8987.17	2015-12-13 00:00:40
8615.26	2015-12-13 00:00:50
8393.12	2015-12-13 00:01:00
8207.75	2015-12-13 00:01:10
	2015-12-13 00:01:20
	2015-12-13 00:01:44
	2015-12-13 00:02:09
	2015-12-13 00:02:33
	2015-12-13 00:02:57
7240.86	2015-12-13 00:03:10
7035.85	2015-12-13 00:03:20
6995.05	2015-12-13 00:03:30
6669.9	2015-12-13 00:03:40
6713.39	2015-12-13 00:03:50
6810.86	2015-12-13 00:04:00
6699.45	2015-12-13 00:04:10
6749.99	2015-12-13 00:04:20
6759.48	2015-12-13 00:04:30
6930.32	2015-12-13 00:04:40
6902.87	2015-12-13 00:04:50
6797.17	2015-12-13 00:05:00
6690.3	2015-12-13 00:05:10
6841.92	2015-12-13 00:05:20
6936.45	2015-12-13 00:05:30
6685.6	2015-12-13 00:05:40
7236.08	2015-12-13 00:05:50
7064.06	2015-12-13 00:06:00
7418.09	2015-12-13 00:06:10
6993.03	2015-12-13 00:06:20
6840.16	2015-12-13 00:06:30
6847.21	2015-12-13 00:06:40
7340.77	2015-12-13 00:06:50
7574.16	2015-12-13 00:07:00
7735.85	2015-12-13 00:07:10
7721.83	2015-12-13 00:07:20
8051.85	2015-12-13 00:07:30
8329.06	2015-12-13 00:07:40
8109.44	2015-12-13 00:07:50
7953.63	2015-12-13 00:08:00
8120.19	2015-12-13 00:08:10
8408.73	2015-12-13 00:08:20
8408.73	2015-12-13 00:08:30
9070.28	2015-12-13 00:08:40
9124.01	2015-12-13 00:08:50
8889.79	2015-12-13 00:09:00
9112.26	2015-12-13 00:09:10
9725.12	2015-12-13 00:09:20
9270.93	2015-12-13 00:09:30
9226.44	2015-12-13 00:09:40
9441.36	2015-12-13 00:09:50
9053.49	2015-12-13 00:10:00
8924.21	2015-12-13 00:10:10
8758.82	2015-12-13 00:10:20
8698.37	2015-12-13 00:10:30
8866.28	2015-12-13 00:10:40
8878.03	2015-12-13 00:10:50
8778.97	2015-12-13 00:11:00
8207.16	2015-12-13 00:11:10
	2015-12-13 00:11:20
	2015-12-13 00:11:44
	2015-12-13 00:12:08
	2015-12-13 00:12:33
	2015-12-13 00:12:50
9860.28	2015-12-13 00:13:00
9520.27	2015-12-13 00:13:10
9602.55	2015-12-13 00:13:20
9731.83	2015-12-13 00:13:30
9370	2015-12-13 00:13:40
9380.07	2015-12-13 00:13:50
9489.21	2015-12-13 00:14:00
9494.25	2015-12-13 00:14:10
9415.33	2015-12-13 00:14:20
9052.65	2015-12-13 00:14:30
8956.11	2015-12-13 00:14:40
9233.99	2015-12-13 00:14:50
9309.55	2015-12-13 00:15:00
9537.06	2015-12-13 00:15:10
10102.9	2015-12-13 00:15:20
9966.9	2015-12-13 00:15:30
9789.76	2015-12-13 00:15:40
9906.46	2015-12-13 00:15:50
9840.13	2015-12-13 00:16:00
9659.63	2015-12-13 00:16:10
9511.04	2015-12-13 00:16:20
9486.69	2015-12-13 00:16:30
9427.08	2015-12-13 00:16:40
9511.04	2015-12-13 00:16:50
9668.03	2015-12-13 00:17:00
9778.01	2015-12-13 00:17:10
9813.27	2015-12-13 00:17:20
9542.94	2015-12-13 00:17:30
9405.26	2015-12-13 00:17:40
9230.63	2015-12-13 00:17:50
9614.3	2015-12-13 00:18:00
9577.36	2015-12-13 00:18:10
9307.03	2015-12-13 00:18:20
9236.51	2015-12-13 00:18:30
9421.21	2015-12-13 00:18:40
9317.95	2015-12-13 00:18:50
9333.06	2015-12-13 00:19:00
9234.83	2015-12-13 00:19:10
9652.92	2015-12-13 00:19:20
9727.64	2015-12-13 00:19:30
9593.31	2015-12-13 00:19:40
9730.16	2015-12-13 00:19:50
9867.84	2015-12-13 00:20:00
9790.6	2015-12-13 00:20:10
9994.61	2015-12-13 00:20:20
9775.49	2015-12-13 00:20:30
9594.15	2015-12-13 00:20:40
9610.94	2015-12-13 00:20:50
9945.91	2015-12-13 00:21:00
9909.81	2015-12-13 00:21:10
	2015-12-13 00:21:20
	2015-12-13 00:21:44
	2015-12-13 00:22:08
	2015-12-13 00:22:33
	2015-12-13 00:22:50
10894.6	2015-12-13 00:23:00
10760.3	2015-12-13 00:23:10
10438.7	2015-12-13 00:23:20
10506.7	2015-12-13 00:23:30
10787.1	2015-12-13 00:23:40
10777.9	2015-12-13 00:23:50
10715.8	2015-12-13 00:24:00
10406.8	2015-12-13 00:24:10
10408.5	2015-12-13 00:24:20
10613.3	2015-12-13 00:24:30
9434.64	2015-12-13 00:24:40
11112.9	2015-12-13 00:24:50
10948.3	2015-12-13 00:25:00
10217.9	2015-12-13 00:25:10
10253.2	2015-12-13 00:25:20
10566.3	2015-12-13 00:25:30
10154.1	2015-12-13 00:25:40
10192.7	2015-12-13 00:25:50
10166.7	2015-12-13 00:26:00
10332.1	2015-12-13 00:26:10
10498.3	2015-12-13 00:26:20
10669.6	2015-12-13 00:26:30
10933.2	2015-12-13 00:26:40
10531.9	2015-12-13 00:26:50
10106.3	2015-12-13 00:27:00
10022.3	2015-12-13 00:27:10
10494.1	2015-12-13 00:27:20
10802.2	2015-12-13 00:27:30
11306	2015-12-13 00:27:40
10871.9	2015-12-13 00:27:50
10724.2	2015-12-13 00:28:00
11057.5	2015-12-13 00:28:10
10984.4	2015-12-13 00:28:20
10809	2015-12-13 00:28:30
11085.2	2015-12-13 00:28:40
10913.9	2015-12-13 00:28:50
10743.5	2015-12-13 00:29:00
10999.5	2015-12-13 00:29:10
11206.9	2015-12-13 00:29:20
11574.6	2015-12-13 00:29:30
10986.9	2015-12-13 00:29:40
11363.9	2015-12-13 00:29:50
11641.8	2015-12-13 00:30:00
11930.6	2015-12-13 00:30:10
11253.1	2015-12-13 00:30:20
11235.4	2015-12-13 00:30:30
11108.7	2015-12-13 00:30:40
11418.5	2015-12-13 00:30:50
11300.9	2015-12-13 00:31:00
11204.4	2015-12-13 00:31:10
	2015-12-13 00:31:20
	2015-12-13 00:31:44
	2015-12-13 00:32:08
	2015-12-13 00:32:33
11516.7	2015-12-13 00:32:40
11457.1	2015-12-13 00:32:50
11644.3	2015-12-13 00:33:00
11633.4	2015-12-13 00:33:10
11813.9	2015-12-13 00:33:20
11766.9	2015-12-13 00:33:30
11882.7	2015-12-13 00:33:40
11932.2	2015-12-13 00:33:50
12042.2	2015-12-13 00:34:00
11994.4	2015-12-13 00:34:10
12190	2015-12-13 00:34:20
11473.9	2015-12-13 00:34:30
11905.4	2015-12-13 00:34:40
11327.8	2015-12-13 00:34:50
11285	2015-12-13 00:35:00
11506.6	2015-12-13 00:35:10
11741.7	2015-12-13 00:35:20
12249.6	2015-12-13 00:35:30
12329.3	2015-12-13 00:35:40
12430.1	2015-12-13 00:35:50
12282.3	2015-12-13 00:36:00
12111.1	2015-12-13 00:36:10
11863.4	2015-12-13 00:36:20
12042.2	2015-12-13 00:36:30
11651.8	2015-12-13 00:36:40
11394.1	2015-12-13 00:36:50
11622.5	2015-12-13 00:37:00
11852.5	2015-12-13 00:37:10
11673.7	2015-12-13 00:37:20
11961.6	2015-12-13 00:37:30
12022.9	2015-12-13 00:37:40
11705.6	2015-12-13 00:37:50
11876	2015-12-13 00:38:00
11853.3	2015-12-13 00:38:10
11980.9	2015-12-13 00:38:20
11741.7	2015-12-13 00:38:30
11784.5	2015-12-13 00:38:40
12076.6	2015-12-13 00:38:50
11966.7	2015-12-13 00:39:00
12183.3	2015-12-13 00:39:10
12205.9	2015-12-13 00:39:20
12367.1	2015-12-13 00:39:30
12273.9	2015-12-13 00:39:40
12229.4	2015-12-13 00:39:50
12377.2	2015-12-13 00:40:00
12543.4	2015-12-13 00:40:10
12355.4	2015-12-13 00:40:20
12292.4	2015-12-13 00:40:30
12141.3	2015-12-13 00:40:40
11950.7	2015-12-13 00:40:50
12263	2015-12-13 00:41:00
12231.1	2015-12-13 00:41:10
	2015-12-13 00:41:20
	2015-12-13 00:41:44
	2015-12-13 00:42:08
	2015-12-13 00:42:33
	2015-12-13 00:42:44
11351.3	2015-12-13 00:42:50
12437.6	2015-12-13 00:43:00
12343.6	2015-12-13 00:43:10
12591.3	2015-12-13 00:43:20
12444.4	2015-12-13 00:43:30
12591.3	2015-12-13 00:43:40
12758.3	2015-12-13 00:43:50
12797	2015-12-13 00:44:00
12911.1	2015-12-13 00:44:10
12917.9	2015-12-13 00:44:20
12760	2015-12-13 00:44:30
12882.6	2015-12-13 00:44:40
12790.2	2015-12-13 00:44:50
12981.7	2015-12-13 00:45:00
13059.7	2015-12-13 00:45:10
13309.9	2015-12-13 00:45:20
13232.7	2015-12-13 00:45:30
13189	2015-12-13 00:45:40
13533.2	2015-12-13 00:45:50
13484.5	2015-12-13 00:46:00
13189	2015-12-13 00:46:10
12989.2	2015-12-13 00:46:20
13195.7	2015-12-13 00:46:30
13168.9	2015-12-13 00:46:40
13216.7	2015-12-13 00:46:50
13301.5	2015-12-13 00:47:00
13427.4	2015-12-13 00:47:10
13097.5	2015-12-13 00:47:20
13178.9	2015-12-13 00:47:30
13252	2015-12-13 00:47:40
13048.8	2015-12-13 00:47:50
13062.3	2015-12-13 00:48:00
13090.8	2015-12-13 00:48:10
12949.8	2015-12-13 00:48:20
13043.8	2015-12-13 00:48:30
13117.7	2015-12-13 00:48:40
13127.7	2015-12-13 00:48:50
12926.2	2015-12-13 00:49:00
12713	2015-12-13 00:49:10
12776.8	2015-12-13 00:49:20
12941.4	2015-12-13 00:49:30
12963.2	2015-12-13 00:49:40
12560.2	2015-12-13 00:49:50
12357.9	2015-12-13 00:50:00
12162.3	2015-12-13 00:50:10
12166.5	2015-12-13 00:50:20
12146.3	2015-12-13 00:50:30
11940.6	2015-12-13 00:50:40
12340.3	2015-12-13 00:50:50
12644.2	2015-12-13 00:51:00
12770.9	2015-12-13 00:51:10
	2015-12-13 00:51:20
	2015-12-13 00:51:44
	2015-12-13 00:52:08
	2015-12-13 00:52:33
	2015-12-13 00:52:50
12712.2	2015-12-13 00:53:00
12647.5	2015-12-13 00:53:10
12871.7	2015-12-13 00:53:20
12871.7	2015-12-13 00:53:30
12569.4	2015-12-13 00:53:40
12699.6	2015-12-13 00:53:50
12607.2	2015-12-13 00:54:00
12631.6	2015-12-13 00:54:10
12710.5	2015-12-13 00:54:20
12748.3	2015-12-13 00:54:30
12765.1	2015-12-13 00:54:40
12865	2015-12-13 00:54:50
12793.6	2015-12-13 00:55:00
12901.9	2015-12-13 00:55:10
12947.2	2015-12-13 00:55:20
12941.4	2015-12-13 00:55:30
12949.8	2015-12-13 00:55:40
11888.6	2015-12-13 00:55:50
12088.4	2015-12-13 00:56:00
12284.8	2015-12-13 00:56:10
12073.3	2015-12-13 00:56:20
11709.8	2015-12-13 00:56:30
11882.7	2015-12-13 00:56:40
12157.2	2015-12-13 00:56:50
11933.9	2015-12-13 00:57:00
11825.6	2015-12-13 00:57:10
12010.3	2015-12-13 00:57:20
11775.3	2015-12-13 00:57:30
11949.9	2015-12-13 00:57:40
11909.6	2015-12-13 00:57:50
11625.8	2015-12-13 00:58:00
11487.3	2015-12-13 00:58:10
11477.2	2015-12-13 00:58:20
11473	2015-12-13 00:58:30
12094.3	2015-12-13 00:58:40
12267.2	2015-12-13 00:58:50
12373.8	2015-12-13 00:59:00
11995.2	2015-12-13 00:59:10
11753.4	2015-12-13 00:59:20
12133.7	2015-12-13 00:59:30
11998.6	2015-12-13 00:59:40
12062.4	2015-12-13 00:59:50
11907.9	2015-12-13 01:00:00
11566.2	2015-12-13 01:00:10
11314.3	2015-12-13 01:00:20
10914.7	2015-12-13 01:00:30
10667.1	2015-12-13 01:00:40
10707.4	2015-12-13 01:00:50
10766.1	2015-12-13 01:01:00
10766.1	2015-12-13 01:01:10
	2015-12-13 01:01:20
	2015-12-13 01:01:44
	2015-12-13 01:02:09
	2015-12-13 01:02:26
10714.9	2015-12-13 01:02:30
11162.4	2015-12-13 01:02:40
11087.7	2015-12-13 01:02:50
11501.6	2015-12-13 01:03:00
11174.1	2015-12-13 01:03:10
10503.4	2015-12-13 01:03:20
10150.8	2015-12-13 01:03:30
10397.6	2015-12-13 01:03:40
10341.3	2015-12-13 01:03:50
10484.1	2015-12-13 01:04:00
10804.8	2015-12-13 01:04:10
11384	2015-12-13 01:04:20
11059.1	2015-12-13 01:04:30
10115.5	2015-12-13 01:04:40
9179.42	2015-12-13 01:04:50
10339.7	2015-12-13 01:05:00
10700.7	2015-12-13 01:05:10
10067.6	2015-12-13 01:05:20
9578.2	2015-12-13 01:05:30
9340.61	2015-12-13 01:05:40
9858.6	2015-12-13 01:05:50
9320.46	2015-12-13 01:06:00
8967.86	2015-12-13 01:06:10
8761.34	2015-12-13 01:06:20
8779.81	2015-12-13 01:06:30
8601.83	2015-12-13 01:06:40
8471.7	2015-12-13 01:06:50
8102.39	2015-12-13 01:07:00
8109.36	2015-12-13 01:07:10
7771.28	2015-12-13 01:07:20
7254.72	2015-12-13 01:07:30
7312.56	2015-12-13 01:07:40
7979.73	2015-12-13 01:07:50
7891.58	2015-12-13 01:08:00
8081.99	2015-12-13 01:08:10
7455.53	2015-12-13 01:08:20
7865.47	2015-12-13 01:08:30
8838.57	2015-12-13 01:08:40
8440.64	2015-12-13 01:08:50
8001.9	2015-12-13 01:09:00
7753.23	2015-12-13 01:09:10
6824.62	2015-12-13 01:09:20
7046.18	2015-12-13 01:09:30
7042.99	2015-12-13 01:09:40
8118.34	2015-12-13 01:09:50
8842.77	2015-12-13 01:10:00
9615.98	2015-12-13 01:10:10
8972.06	2015-12-13 01:10:20
7157.25	2015-12-13 01:10:30
6491.16	2015-12-13 01:10:40
6661.42	2015-12-13 01:10:50
7267.56	2015-12-13 01:11:00
8082.58	2015-12-13 01:11:10
	2015-12-13 01:11:20
	2015-12-13 01:11:44
	2015-12-13 01:12:09
	2015-12-13 01:12:33
	2015-12-13 01:12:57
	2015-12-13 01:13:21
	2015-12-13 01:13:37
5061.86	2015-12-13 01:13:40
5025.34	2015-12-13 01:13:50
4986.31	2015-12-13 01:14:00
5141.7	2015-12-13 01:14:10
5344.87	2015-12-13 01:14:20
6101.79	2015-12-13 01:14:30
6514.25	2015-12-13 01:14:40
5276.7	2015-12-13 01:14:50
4874.82	2015-12-13 01:15:00
4646.55	2015-12-13 01:15:10
4617.25	2015-12-13 01:15:20
4594.83	2015-12-13 01:15:30
4551.35	2015-12-13 01:15:40
4472.43	2015-12-13 01:15:50
4452.53	2015-12-13 01:16:00
4417.19	2015-12-13 01:16:10
4498.29	2015-12-13 01:16:20
4509.7	2015-12-13 01:16:30
4592.82	2015-12-13 01:16:40
4564.61	2015-12-13 01:16:50
4486.37	2015-12-13 01:17:00
4456.06	2015-12-13 01:17:10
4492.41	2015-12-13 01:17:20
4448.33	2015-12-13 01:17:30
4405.69	2015-12-13 01:17:40
4330.8	2015-12-13 01:17:50
4389.48	2015-12-13 01:18:00
4359.01	2015-12-13 01:18:10
4275.22	2015-12-13 01:18:20
4360.52	2015-12-13 01:18:30
4367.74	2015-12-13 01:18:40
4342.97	2015-12-13 01:18:50
4315.52	2015-12-13 01:19:00
3974.17	2015-12-13 01:19:10
4347.93	2015-12-13 01:19:20
4230.06	2015-12-13 01:19:30
4291.85	2015-12-13 01:19:40
4320.98	2015-12-13 01:19:50
4313.76	2015-12-13 01:20:00
4430.03	2015-12-13 01:20:10
4338.61	2015-12-13 01:20:20
4345.49	2015-12-13 01:20:30
4202.94	2015-12-13 01:20:40
4166.5	2015-12-13 01:20:50
4174.56	2015-12-13 01:21:00
4164.24	2015-12-13 01:21:10
	2015-12-13 01:21:20
	2015-12-13 01:21:44
	2015-12-13 01:22:08
	2015-12-13 01:22:33
	2015-12-13 01:22:57
	2015-12-13 01:23:21
4885.48	2015-12-13 01:23:30
4979.51	2015-12-13 01:23:40
4737.72	2015-12-13 01:23:50
4765.59	2015-12-13 01:24:00
4808.41	2015-12-13 01:24:10
4883.88	2015-12-13 01:24:20
4766.43	2015-12-13 01:24:30
4821	2015-12-13 01:24:40
4851.06	2015-12-13 01:24:50
4885.65	2015-12-13 01:25:00
4862.22	2015-12-13 01:25:10
4883.13	2015-12-13 01:25:20
4831.08	2015-12-13 01:25:30
4927.29	2015-12-13 01:25:40
4950.21	2015-12-13 01:25:50
4874.31	2015-12-13 01:26:00
4877.5	2015-12-13 01:26:10
4919.14	2015-12-13 01:26:20
5178.81	2015-12-13 01:26:30
5397.93	2015-12-13 01:26:40
5703.26	2015-12-13 01:26:50
5823.74	2015-12-13 01:27:00
5715.52	2015-12-13 01:27:10
5642.15	2015-12-13 01:27:20
5818.87	2015-12-13 01:27:30
5973.01	2015-12-13 01:27:40
5845.4	2015-12-13 01:27:50
5878.31	2015-12-13 01:28:00
6008.52	2015-12-13 01:28:10
6216.22	2015-12-13 01:28:20
6111.95	2015-12-13 01:28:30
5997.27	2015-12-13 01:28:40
6066.7	2015-12-13 01:28:50
6119.84	2015-12-13 01:29:00
6203.88	2015-12-13 01:29:10
6057.21	2015-12-13 01:29:20
6025.98	2015-12-13 01:29:30
5969.9	2015-12-13 01:29:40
6434.08	2015-12-13 01:29:50
6525.58	2015-12-13 01:30:00
6837.55	2015-12-13 01:30:10
6952.74	2015-12-13 01:30:20
7261.68	2015-12-13 01:30:30
7830.05	2015-12-13 01:30:40
8432.24	2015-12-13 01:30:50
8447.35	2015-12-13 01:31:00
8605.18	2015-12-13 01:31:10
	2015-12-13 01:31:20
	2015-12-13 01:31:44
	2015-12-13 01:32:09
	2015-12-13 01:32:29
7452.93	2015-12-13 01:32:30
7702.86	2015-12-13 01:32:40
8202.97	2015-12-13 01:32:50
8063.02	2015-12-13 01:33:00
8322.6	2015-12-13 01:33:10
9165.99	2015-12-13 01:33:20
8946.87	2015-12-13 01:33:30
9077	2015-12-13 01:33:40
8920.01	2015-12-13 01:33:50
8844.45	2015-12-13 01:34:00
8700.05	2015-12-13 01:34:10
8591.75	2015-12-13 01:34:20
8568.25	2015-12-13 01:34:30
8829.34	2015-12-13 01:34:40
8993.89	2015-12-13 01:34:50
9160.11	2015-12-13 01:35:00
9525.31	2015-12-13 01:35:10
9537.9	2015-12-13 01:35:20
9060.21	2015-12-13 01:35:30
9477.46	2015-12-13 01:35:40
10217.9	2015-12-13 01:35:50
9720.08	2015-12-13 01:36:00
9390.15	2015-12-13 01:36:10
9465.7	2015-12-13 01:36:20
9932.48	2015-12-13 01:36:30
9461.51	2015-12-13 01:36:40
9348.17	2015-12-13 01:36:50
9587.43	2015-12-13 01:37:00
9526.15	2015-12-13 01:37:10
9424.57	2015-12-13 01:37:20
9504.32	2015-12-13 01:37:30
9824.18	2015-12-13 01:37:40
9956.83	2015-12-13 01:37:50
10457.2	2015-12-13 01:38:00
10642.7	2015-12-13 01:38:10
10301	2015-12-13 01:38:20
10357.3	2015-12-13 01:38:30
10126.4	2015-12-13 01:38:40
10301.9	2015-12-13 01:38:50
10706.5	2015-12-13 01:39:00
10474.8	2015-12-13 01:39:10
10605.8	2015-12-13 01:39:20
10796.4	2015-12-13 01:39:30
11135.5	2015-12-13 01:39:40
11258.9	2015-12-13 01:39:50
11295	2015-12-13 01:40:00
11344.6	2015-12-13 01:40:10
11184.2	2015-12-13 01:40:20
10980.2	2015-12-13 01:40:30
11067.5	2015-12-13 01:40:40
11148.1	2015-12-13 01:40:50
11133.8	2015-12-13 01:41:00
10971	2015-12-13 01:41:10
	2015-12-13 01:41:29
	2015-12-13 01:41:53
	2015-12-13 01:42:17
	2015-12-13 01:42:41
11356.3	2015-12-13 01:42:50
11393.3	2015-12-13 01:43:00
11356.3	2015-12-13 01:43:10
11410.9	2015-12-13 01:43:20
11379.8	2015-12-13 01:43:30
11439.4	2015-12-13 01:43:40
11417.6	2015-12-13 01:43:50
11443.6	2015-12-13 01:44:00
11447.8	2015-12-13 01:44:10
11381.5	2015-12-13 01:44:20
11342.1	2015-12-13 01:44:30
11201.9	2015-12-13 01:44:40
11178.3	2015-12-13 01:44:50
10684.7	2015-12-13 01:45:00
10609.1	2015-12-13 01:45:10
10642.7	2015-12-13 01:45:20
10991.1	2015-12-13 01:45:30
10937.4	2015-12-13 01:45:40
10928.2	2015-12-13 01:45:50
11031.4	2015-12-13 01:46:00
10719.1	2015-12-13 01:46:10
10807.3	2015-12-13 01:46:20
10637.7	2015-12-13 01:46:30
10598.2	2015-12-13 01:46:40
10803.9	2015-12-13 01:46:50
10487.4	2015-12-13 01:47:00
10661.2	2015-12-13 01:47:10
10448.8	2015-12-13 01:47:20
10147.4	2015-12-13 01:47:30
10285.1	2015-12-13 01:47:40
10434.5	2015-12-13 01:47:50
10609.1	2015-12-13 01:48:00
10738.4	2015-12-13 01:48:10
10845.1	2015-12-13 01:48:20
10932.4	2015-12-13 01:48:30
9785.56	2015-12-13 01:48:40
10578.1	2015-12-13 01:48:50
10536.1	2015-12-13 01:49:00
10550.4	2015-12-13 01:49:10
10006.4	2015-12-13 01:49:20
10120.5	2015-12-13 01:49:30
10129.8	2015-12-13 01:49:40
10136.5	2015-12-13 01:49:50
10031.5	2015-12-13 01:50:00
10286.8	2015-12-13 01:50:10
10330.4	2015-12-13 01:50:20
10377.4	2015-12-13 01:50:30
10629.3	2015-12-13 01:50:40
10432	2015-12-13 01:50:50
10149.1	2015-12-13 01:51:00
	2015-12-13 01:51:10
	2015-12-13 01:51:35
	2015-12-13 01:51:59
	2015-12-13 01:52:23
	2015-12-13 01:52:47
11106.1	2015-12-13 01:53:00
10306.9	2015-12-13 01:53:10
11336.2	2015-12-13 01:53:20
11111.2	2015-12-13 01:53:30
11115.4	2015-12-13 01:53:40
11092.7	2015-12-13 01:53:50
11129.7	2015-12-13 01:54:00
11016.3	2015-12-13 01:54:10
11155.7	2015-12-13 01:54:20
11391.6	2015-12-13 01:54:30
11277.4	2015-12-13 01:54:40
10738.4	2015-12-13 01:54:50
11033.9	2015-12-13 01:55:00
10687.2	2015-12-13 01:55:10
10500	2015-12-13 01:55:20
10709	2015-12-13 01:55:30
10440.4	2015-12-13 01:55:40
10350.6	2015-12-13 01:55:50
10415.2	2015-12-13 01:56:00
10504.2	2015-12-13 01:56:10
10656.2	2015-12-13 01:56:20
10954.2	2015-12-13 01:56:30
10989.5	2015-12-13 01:56:40
10725.8	2015-12-13 01:56:50
10556.3	2015-12-13 01:57:00
10637.7	2015-12-13 01:57:10
10381.6	2015-12-13 01:57:20
10275	2015-12-13 01:57:30
10414.4	2015-12-13 01:57:40
10385	2015-12-13 01:57:50
10291	2015-12-13 01:58:00
10096.2	2015-12-13 01:58:10
10255.7	2015-12-13 01:58:20
10307.8	2015-12-13 01:58:30
10137.3	2015-12-13 01:58:40
10123.1	2015-12-13 01:58:50
10155	2015-12-13 01:59:00
10241.4	2015-12-13 01:59:10
10541.1	2015-12-13 01:59:20
10640.2	2015-12-13 01:59:30
10555.4	2015-12-13 01:59:40
10837.5	2015-12-13 01:59:50
10938.2	2015-12-13 02:00:00
11102.8	2015-12-13 02:00:10
11021.4	2015-12-13 02:00:20
11162.4	2015-12-13 02:00:30
11182.5	2015-12-13 02:00:40
11255.6	2015-12-13 02:00:50
11326.1	2015-12-13 02:01:00
	2015-12-13 02:01:10
	2015-12-13 02:01:34
	2015-12-13 02:02:02
	2015-12-13 02:02:23
11774.4	2015-12-13 02:02:30
11715.6	2015-12-13 02:02:40
11830.7	2015-12-13 02:02:50
11621.6	2015-12-13 02:03:00
11738.3	2015-12-13 02:03:10
11076.8	2015-12-13 02:03:20
11525.9	2015-12-13 02:03:30
11325.3	2015-12-13 02:03:40
11351.3	2015-12-13 02:03:50
10783.8	2015-12-13 02:04:00
10460.5	2015-12-13 02:04:10
10328.7	2015-12-13 02:04:20
10800.6	2015-12-13 02:04:30
11284.1	2015-12-13 02:04:40
11489.8	2015-12-13 02:04:50
11715.6	2015-12-13 02:05:00
11491.5	2015-12-13 02:05:10
11259.8	2015-12-13 02:05:20
11094.4	2015-12-13 02:05:30
11253.1	2015-12-13 02:05:40
11323.6	2015-12-13 02:05:50
11429.4	2015-12-13 02:06:00
11117.1	2015-12-13 02:06:10
11123.8	2015-12-13 02:06:20
10502.5	2015-12-13 02:06:30
10333.8	2015-12-13 02:06:40
10429.5	2015-12-13 02:06:50
10448.8	2015-12-13 02:07:00
10881.2	2015-12-13 02:07:10
10981.1	2015-12-13 02:07:20
10856.8	2015-12-13 02:07:30
10351.4	2015-12-13 02:07:40
10632.7	2015-12-13 02:07:50
10625.9	2015-12-13 02:08:00
10310.3	2015-12-13 02:08:10
10273.3	2015-12-13 02:08:20
9768.77	2015-12-13 02:08:30
9930.8	2015-12-13 02:08:40
9661.31	2015-12-13 02:08:50
9375.87	2015-12-13 02:09:00
9421.21	2015-12-13 02:09:10
9212.16	2015-12-13 02:09:20
8664.79	2015-12-13 02:09:30
8321.93	2015-12-13 02:09:40
8587.55	2015-12-13 02:09:50
8178.37	2015-12-13 02:10:00
7783.37	2015-12-13 02:10:10
7373.09	2015-12-13 02:10:20
7005.63	2015-12-13 02:10:30
6908.58	2015-12-13 02:10:40
6663.1	2015-12-13 02:10:50
6690.3	2015-12-13 02:11:00
	2015-12-13 02:11:10
	2015-12-13 02:11:34
	2015-12-13 02:11:59
	2015-12-13 02:12:26
6806.91	2015-12-13 02:12:40
6741.43	2015-12-13 02:12:50
6980.78	2015-12-13 02:13:00
7122.99	2015-12-13 02:13:10
6731.69	2015-12-13 02:13:20
6705.24	2015-12-13 02:13:30
6766.45	2015-12-13 02:13:40
6757.71	2015-12-13 02:13:50
6698.53	2015-12-13 02:14:00
6716.75	2015-12-13 02:14:10
6628.93	2015-12-13 02:14:20
6602.82	2015-12-13 02:14:30
6873.32	2015-12-13 02:14:40
6893.55	2015-12-13 02:14:50
6869.04	2015-12-13 02:15:00
6605.17	2015-12-13 02:15:10
6667.38	2015-12-13 02:15:20
6539.44	2015-12-13 02:15:30
6543.97	2015-12-13 02:15:40
6713.22	2015-12-13 02:15:50
6972.63	2015-12-13 02:16:00
7296.69	2015-12-13 02:16:10
7287.37	2015-12-13 02:16:20
7306.01	2015-12-13 02:16:30
7608.41	2015-12-13 02:16:40
7802.76	2015-12-13 02:16:50
7649.3	2015-12-13 02:17:00
7487.85	2015-12-13 02:17:10
7596.07	2015-12-13 02:17:20
7205.27	2015-12-13 02:17:30
6879.28	2015-12-13 02:17:40
6795.66	2015-12-13 02:17:50
7226.84	2015-12-13 02:18:00
7347.74	2015-12-13 02:18:10
7446.72	2015-12-13 02:18:20
7450.66	2015-12-13 02:18:30
7586.58	2015-12-13 02:18:40
7321.63	2015-12-13 02:18:50
7160.19	2015-12-13 02:19:00
7235.99	2015-12-13 02:19:10
7110.32	2015-12-13 02:19:20
7216.1	2015-12-13 02:19:30
7097.56	2015-12-13 02:19:40
7239.44	2015-12-13 02:19:50
7166.48	2015-12-13 02:20:00
7038.96	2015-12-13 02:20:10
6912.78	2015-12-13 02:20:20
6776.86	2015-12-13 02:20:30
6696.18	2015-12-13 02:20:40
6517.36	2015-12-13 02:20:50
6527.26	2015-12-13 02:21:00
	2015-12-13 02:21:10
	2015-12-13 02:21:34
	2015-12-13 02:21:59
	2015-12-13 02:22:18
6644.63	2015-12-13 02:22:20
6830	2015-12-13 02:22:30
7132.48	2015-12-13 02:22:40
7069.6	2015-12-13 02:22:50
6862.32	2015-12-13 02:23:00
6662.43	2015-12-13 02:23:10
6640.6	2015-12-13 02:23:20
6639	2015-12-13 02:23:30
6456.32	2015-12-13 02:23:40
6411.58	2015-12-13 02:23:50
6632.12	2015-12-13 02:24:00
6571.93	2015-12-13 02:24:10
6323.76	2015-12-13 02:24:20
6104.31	2015-12-13 02:24:30
5815.93	2015-12-13 02:24:40
6223.27	2015-12-13 02:24:50
6221.93	2015-12-13 02:25:00
6397.64	2015-12-13 02:25:10
6404.27	2015-12-13 02:25:20
6266.17	2015-12-13 02:25:30
6170.38	2015-12-13 02:25:40
6207.32	2015-12-13 02:25:50
6303.95	2015-12-13 02:26:00
6861.56	2015-12-13 02:26:10
7022.42	2015-12-13 02:26:20
6752.93	2015-12-13 02:26:30
6763.34	2015-12-13 02:26:40
6719.6	2015-12-13 02:26:50
6810.35	2015-12-13 02:27:00
6715.57	2015-12-13 02:27:10
6938.13	2015-12-13 02:27:20
6866.52	2015-12-13 02:27:30
6833.86	2015-12-13 02:27:40
7077.49	2015-12-13 02:27:50
6953.49	2015-12-13 02:28:00
6726.32	2015-12-13 02:28:10
6687.95	2015-12-13 02:28:20
6687.36	2015-12-13 02:28:30
6608.7	2015-12-13 02:28:40
6736.81	2015-12-13 02:28:50
6632.12	2015-12-13 02:29:00
6747.14	2015-12-13 02:29:10
6703.82	2015-12-13 02:29:20
6598.46	2015-12-13 02:29:30
6595.52	2015-12-13 02:29:40
6540.61	2015-12-13 02:29:50
6516.52	2015-12-13 02:30:00
6608.87	2015-12-13 02:30:10
6579.48	2015-12-13 02:30:20
6479.49	2015-12-13 02:30:30
6495.7	2015-12-13 02:30:40
6383.45	2015-12-13 02:30:50
6540.28	2015-12-13 02:31:00
	2015-12-13 02:31:10
	2015-12-13 02:31:34
	2015-12-13 02:31:59
	2015-12-13 02:32:23
	2015-12-13 02:32:50
	2015-12-13 02:33:14
	2015-12-13 02:33:35
7005.88	2015-12-13 02:33:40
7166.99	2015-12-13 02:33:50
7141.04	2015-12-13 02:34:00
7165.98	2015-12-13 02:34:10
7330.19	2015-12-13 02:34:20
7468.29	2015-12-13 02:34:30
7532.85	2015-12-13 02:34:40
7443.78	2015-12-13 02:34:50
7396.26	2015-12-13 02:35:00
7408.01	2015-12-13 02:35:10
7632.34	2015-12-13 02:35:20
7582.22	2015-12-13 02:35:30
7827.7	2015-12-13 02:35:40
7865.39	2015-12-13 02:35:50
8310.01	2015-12-13 02:36:00
8523.75	2015-12-13 02:36:10
8775.61	2015-12-13 02:36:20
8997.25	2015-12-13 02:36:30
9667.19	2015-12-13 02:36:40
9275.13	2015-12-13 02:36:50
9291.92	2015-12-13 02:37:00
9433.8	2015-12-13 02:37:10
10018.1	2015-12-13 02:37:20
10044.1	2015-12-13 02:37:30
9612.62	2015-12-13 02:37:40
8900.7	2015-12-13 02:37:50
9106.38	2015-12-13 02:38:00
9317.11	2015-12-13 02:38:10
8987.17	2015-12-13 02:38:20
8443.16	2015-12-13 02:38:30
8545.58	2015-12-13 02:38:40
8638.77	2015-12-13 02:38:50
9032.51	2015-12-13 02:39:00
9227.28	2015-12-13 02:39:10
8452.39	2015-12-13 02:39:20
8381.11	2015-12-13 02:39:30
8285.74	2015-12-13 02:39:40
8563.21	2015-12-13 02:39:50
8382.54	2015-12-13 02:40:00
8574.96	2015-12-13 02:40:10
8857.88	2015-12-13 02:40:20
8817.59	2015-12-13 02:40:30
8905.74	2015-12-13 02:40:40
8331.33	2015-12-13 02:40:50
8260.73	2015-12-13 02:41:00
	2015-12-13 02:41:10
	2015-12-13 02:41:34
	2015-12-13 02:41:59
	2015-12-13 02:42:23
	2015-12-13 02:42:47
	2015-12-13 02:43:08
8516.19	2015-12-13 02:43:10
8417.97	2015-12-13 02:43:20
8393.12	2015-12-13 02:43:30
8357.27	2015-12-13 02:43:40
8167.29	2015-12-13 02:43:50
7923.99	2015-12-13 02:44:00
8022.55	2015-12-13 02:44:10
8189.03	2015-12-13 02:44:20
8244.1	2015-12-13 02:44:30
8135.38	2015-12-13 02:44:40
8139.75	2015-12-13 02:44:50
8171.9	2015-12-13 02:45:00
7965.8	2015-12-13 02:45:10
7645.94	2015-12-13 02:45:20
7862.79	2015-12-13 02:45:30
7893.43	2015-12-13 02:45:40
7821.9	2015-12-13 02:45:50
7832.56	2015-12-13 02:46:00
7743.74	2015-12-13 02:46:10
7615.13	2015-12-13 02:46:20
7617.98	2015-12-13 02:46:30
7397.44	2015-12-13 02:46:40
7231.04	2015-12-13 02:46:50
7096.88	2015-12-13 02:47:00
7275.28	2015-12-13 02:47:10
7403.06	2015-12-13 02:47:20
7309.12	2015-12-13 02:47:30
7464.26	2015-12-13 02:47:40
7492.47	2015-12-13 02:47:50
7499.1	2015-12-13 02:48:00
7502.46	2015-12-13 02:48:10
7289.39	2015-12-13 02:48:20
7257.15	2015-12-13 02:48:30
7181.93	2015-12-13 02:48:40
6990.52	2015-12-13 02:48:50
6777.44	2015-12-13 02:49:00
6976.33	2015-12-13 02:49:10
7345.47	2015-12-13 02:49:20
7431.44	2015-12-13 02:49:30
7436.14	2015-12-13 02:49:40
7248.08	2015-12-13 02:49:50
7275.62	2015-12-13 02:50:00
7372.17	2015-12-13 02:50:10
7379.47	2015-12-13 02:50:20
7439.16	2015-12-13 02:50:30
7372.67	2015-12-13 02:50:40
7414.31	2015-12-13 02:50:50
7492.05	2015-12-13 02:51:00
	2015-12-13 02:51:10
	2015-12-13 02:51:34
	2015-12-13 02:51:59
	2015-12-13 02:52:23
	2015-12-13 02:52:47
	2015-12-13 02:53:11
	2015-12-13 02:53:32
8006.5	2015-12-13 02:53:40
8001	2015-12-13 02:53:50
8129.6	2015-12-13 02:54:00
8332.5	2015-12-13 02:54:10
8084.6	2015-12-13 02:54:20
7865.9	2015-12-13 02:54:30
7646.2	2015-12-13 02:54:40
7513.1	2015-12-13 02:54:50
7424.6	2015-12-13 02:55:00
7161.5	2015-12-13 02:55:10
6964.3	2015-12-13 02:55:20
6988.5	2015-12-13 02:55:30
7157.8	2015-12-13 02:55:40
7098.4	2015-12-13 02:55:50
7183.8	2015-12-13 02:56:00
7317.3	2015-12-13 02:56:10
7813.5	2015-12-13 02:56:20
7480.3	2015-12-13 02:56:30
7196.4	2015-12-13 02:56:40
6949	2015-12-13 02:56:50
6790.9	2015-12-13 02:57:00
6681.5	2015-12-13 02:57:10
6656.7	2015-12-13 02:57:20
6540.6	2015-12-13 02:57:30
6916.1	2015-12-13 02:57:40
7156.3	2015-12-13 02:57:50
7493	2015-12-13 02:58:00
7820.4	2015-12-13 02:58:10
7625.1	2015-12-13 02:58:20
7211.6	2015-12-13 02:58:30
6973.9	2015-12-13 02:58:40
7142.6	2015-12-13 02:58:50
7581	2015-12-13 02:59:00
7838.8	2015-12-13 02:59:10
8040.9	2015-12-13 02:59:20
7950.1	2015-12-13 02:59:30
8214.7	2015-12-13 02:59:40
8459.2	2015-12-13 02:59:50
8516.4	2015-12-13 03:00:00
8373.1	2015-12-13 03:00:10
7754.9	2015-12-13 03:00:20
7854.3	2015-12-13 03:00:30
7969.5	2015-12-13 03:00:40
8123.7	2015-12-13 03:00:50
8848.2	2015-12-13 03:01:00
	2015-12-13 03:01:10
	2015-12-13 03:01:34
	2015-12-13 03:01:59
	2015-12-13 03:02:23
	2015-12-13 03:02:47
	2015-12-13 03:03:11
	2015-12-13 03:03:25
9574.5	2015-12-13 03:03:30
9337.8	2015-12-13 03:03:40
9329.5	2015-12-13 03:03:50
9265.5	2015-12-13 03:04:00
9382.8	2015-12-13 03:04:10
9331.3	2015-12-13 03:04:20
9289.8	2015-12-13 03:04:30
9185.2	2015-12-13 03:04:40
9308.5	2015-12-13 03:04:50
9278	2015-12-13 03:05:00
9408.5	2015-12-13 03:05:10
9242.3	2015-12-13 03:05:20
8890.2	2015-12-13 03:05:30
8874.9	2015-12-13 03:05:40
9046.2	2015-12-13 03:05:50
8954.8	2015-12-13 03:06:00
8941.1	2015-12-13 03:06:10
9150.1	2015-12-13 03:06:20
9691.7	2015-12-13 03:06:30
9442.3	2015-12-13 03:06:40
9426.7	2015-12-13 03:06:50
9486.9	2015-12-13 03:07:00
9509.9	2015-12-13 03:07:10
9469.3	2015-12-13 03:07:20
9796	2015-12-13 03:07:30
9753.3	2015-12-13 03:07:40
9687.1	2015-12-13 03:07:50
9612.1	2015-12-13 03:08:00
9588.4	2015-12-13 03:08:10
9235.1	2015-12-13 03:08:20
9136.5	2015-12-13 03:08:30
9217.6	2015-12-13 03:08:40
9274.3	2015-12-13 03:08:50
9126.3	2015-12-13 03:09:00
9159.2	2015-12-13 03:09:10
9559.6	2015-12-13 03:09:20
9550.3	2015-12-13 03:09:30
9665.1	2015-12-13 03:09:40
9587.2	2015-12-13 03:09:50
9600.8	2015-12-13 03:10:00
9637.8	2015-12-13 03:10:10
9006.4	2015-12-13 03:10:20
8725.7	2015-12-13 03:10:30
8894.6	2015-12-13 03:10:40
8941.8	2015-12-13 03:10:50
8867.5	2015-12-13 03:11:00
	2015-12-13 03:11:10
	2015-12-13 03:11:34
	2015-12-13 03:11:59
	2015-12-13 03:12:23
	2015-12-13 03:12:38
9316.1	2015-12-13 03:12:40
9656.3	2015-12-13 03:12:50
9828.1	2015-12-13 03:13:00
10040	2015-12-13 03:13:10
9907.2	2015-12-13 03:13:20
9917.5	2015-12-13 03:13:30
9931.2	2015-12-13 03:13:40
10016	2015-12-13 03:13:50
10078	2015-12-13 03:14:00
10146	2015-12-13 03:14:10
10161	2015-12-13 03:14:20
10194	2015-12-13 03:14:30
10294	2015-12-13 03:14:40
10353	2015-12-13 03:14:50
10294	2015-12-13 03:15:00
10176	2015-12-13 03:15:10
10124	2015-12-13 03:15:20
10240	2015-12-13 03:15:30
10394	2015-12-13 03:15:40
10559	2015-12-13 03:15:50
10426	2015-12-13 03:16:00
10234	2015-12-13 03:16:10
10425	2015-12-13 03:16:20
10495	2015-12-13 03:16:30
10480	2015-12-13 03:16:40
10683	2015-12-13 03:16:50
10645	2015-12-13 03:17:00
10760	2015-12-13 03:17:10
10749	2015-12-13 03:17:20
11061	2015-12-13 03:17:30
10982	2015-12-13 03:17:40
10857	2015-12-13 03:17:50
10739	2015-12-13 03:18:00
10617	2015-12-13 03:18:10
10684	2015-12-13 03:18:20
10500	2015-12-13 03:18:30
10537	2015-12-13 03:18:40
10333	2015-12-13 03:18:50
10396	2015-12-13 03:19:00
10421	2015-12-13 03:19:10
10578	2015-12-13 03:19:20
10831	2015-12-13 03:19:30
10995	2015-12-13 03:19:40
10972	2015-12-13 03:19:50
10992	2015-12-13 03:20:00
10980	2015-12-13 03:20:10
11001	2015-12-13 03:20:20
10780	2015-12-13 03:20:30
10645	2015-12-13 03:20:40
10621	2015-12-13 03:20:50
10406	2015-12-13 03:21:00
	2015-12-13 03:21:10
	2015-12-13 03:21:34
	2015-12-13 03:21:59
	2015-12-13 03:22:23
	2015-12-13 03:22:47
	2015-12-13 03:23:11
	2015-12-13 03:23:25
9739.4	2015-12-13 03:23:30
9755.5	2015-12-13 03:23:40
9836.4	2015-12-13 03:23:50
9949.5	2015-12-13 03:24:00
9860	2015-12-13 03:24:10
9719.3	2015-12-13 03:24:20
9639.9	2015-12-13 03:24:30
9709.4	2015-12-13 03:24:40
9969.3	2015-12-13 03:24:50
9813.4	2015-12-13 03:25:00
9917.6	2015-12-13 03:25:10
9865	2015-12-13 03:25:20
9827	2015-12-13 03:25:30
9604.2	2015-12-13 03:25:40
9410.7	2015-12-13 03:25:50
9456.7	2015-12-13 03:26:00
9444	2015-12-13 03:26:10
9519.3	2015-12-13 03:26:20
9460.9	2015-12-13 03:26:30
9521.7	2015-12-13 03:26:40
9613.9	2015-12-13 03:26:50
9636.8	2015-12-13 03:27:00
9299.8	2015-12-13 03:27:10
9196.4	2015-12-13 03:27:20
9227.1	2015-12-13 03:27:30
9281.8	2015-12-13 03:27:40
9492.3	2015-12-13 03:27:50
9309.9	2015-12-13 03:28:00
9344.5	2015-12-13 03:28:10
9250.3	2015-12-13 03:28:20
9198.4	2015-12-13 03:28:30
9050.1	2015-12-13 03:28:40
9275.2	2015-12-13 03:28:50
9433.9	2015-12-13 03:29:00
9689.3	2015-12-13 03:29:10
9809.1	2015-12-13 03:29:20
9746.5	2015-12-13 03:29:30
9657.7	2015-12-13 03:29:40
10139	2015-12-13 03:29:50
10326	2015-12-13 03:30:00
9978.9	2015-12-13 03:30:10
10135	2015-12-13 03:30:20
10254	2015-12-13 03:30:30
10232	2015-12-13 03:30:40
10287	2015-12-13 03:30:50
10240	2015-12-13 03:31:00
	2015-12-13 03:31:10
	2015-12-13 03:31:35
	2015-12-13 03:31:59
	2015-12-13 03:32:23
	2015-12-13 03:32:47
	2015-12-13 03:33:11
9738.5	2015-12-13 03:33:20
9929.1	2015-12-13 03:33:30
9824.7	2015-12-13 03:33:40
9657.3	2015-12-13 03:33:50
9649.2	2015-12-13 03:34:00
9580.5	2015-12-13 03:34:10
9735.9	2015-12-13 03:34:20
9967.5	2015-12-13 03:34:30
10192	2015-12-13 03:34:40
10205	2015-12-13 03:34:50
10235	2015-12-13 03:35:00
10113	2015-12-13 03:35:10
10185	2015-12-13 03:35:20
10251	2015-12-13 03:35:30
10317	2015-12-13 03:35:40
10273	2015-12-13 03:35:50
10209	2015-12-13 03:36:00
10185	2015-12-13 03:36:10
10269	2015-12-13 03:36:20
10015	2015-12-13 03:36:30
9808.4	2015-12-13 03:36:40
9989.7	2015-12-13 03:36:50
10015	2015-12-13 03:37:00
9751.7	2015-12-13 03:37:10
9688.2	2015-12-13 03:37:20
9723.6	2015-12-13 03:37:30
9958.5	2015-12-13 03:37:40
9756.5	2015-12-13 03:37:50
9857.1	2015-12-13 03:38:00
9893	2015-12-13 03:38:10
10093	2015-12-13 03:38:20
10049	2015-12-13 03:38:30
10152	2015-12-13 03:38:40
10075	2015-12-13 03:38:50
9953.6	2015-12-13 03:39:00
10050	2015-12-13 03:39:10
10119	2015-12-13 03:39:20
10232	2015-12-13 03:39:30
10136	2015-12-13 03:39:40
10144	2015-12-13 03:39:50
10293	2015-12-13 03:40:00
10102	2015-12-13 03:40:10
9754.9	2015-12-13 03:40:20
9568.9	2015-12-13 03:40:30
9136.5	2015-12-13 03:40:40
8754.1	2015-12-13 03:40:50
8953	2015-12-13 03:41:00
	2015-12-13 03:41:10
	2015-12-13 03:41:35
	2015-12-13 03:41:59
	2015-12-13 03:42:23
	2015-12-13 03:42:47
	2015-12-13 03:43:12
	2015-12-13 03:43:28
9681.6	2015-12-13 03:43:30
9681.4	2015-12-13 03:43:40
9780.1	2015-12-13 03:43:50
9823.9	2015-12-13 03:44:00
10057	2015-12-13 03:44:10
10293	2015-12-13 03:44:20
10265	2015-12-13 03:44:30
10232	2015-12-13 03:44:40
10468	2015-12-13 03:44:50
10442	2015-12-13 03:45:00
10569	2015-12-13 03:45:10
10302	2015-12-13 03:45:20
10293	2015-12-13 03:45:30
10346	2015-12-13 03:45:40
10426	2015-12-13 03:45:50
10138	2015-12-13 03:46:00
10158	2015-12-13 03:46:10
10150	2015-12-13 03:46:20
10238	2015-12-13 03:46:30
9953.2	2015-12-13 03:46:40
10283	2015-12-13 03:46:50
10221	2015-12-13 03:47:00
10040	2015-12-13 03:47:10
10103	2015-12-13 03:47:20
10215	2015-12-13 03:47:30
10203	2015-12-13 03:47:40
10156	2015-12-13 03:47:50
10038	2015-12-13 03:48:00
10259	2015-12-13 03:48:10
10331	2015-12-13 03:48:20
10307	2015-12-13 03:48:30
10262	2015-12-13 03:48:40
10199	2015-12-13 03:48:50
10171	2015-12-13 03:49:00
10318	2015-12-13 03:49:10
10134	2015-12-13 03:49:20
10157	2015-12-13 03:49:30
10090	2015-12-13 03:49:40
10101	2015-12-13 03:49:50
10051	2015-12-13 03:50:00
10081	2015-12-13 03:50:10
9940	2015-12-13 03:50:20
9820	2015-12-13 03:50:30
9833.3	2015-12-13 03:50:40
10073	2015-12-13 03:50:50
9817.3	2015-12-13 03:51:00
	2015-12-13 03:51:10
	2015-12-13 03:51:34
	2015-12-13 03:51:59
	2015-12-13 03:52:23
	2015-12-13 03:52:47
	2015-12-13 03:53:11
	2015-12-13 03:53:24
9212.8	2015-12-13 03:53:30
9088.8	2015-12-13 03:53:40
9087	2015-12-13 03:53:50
8912.4	2015-12-13 03:54:00
8957	2015-12-13 03:54:10
8885.1	2015-12-13 03:54:20
9016.4	2015-12-13 03:54:30
9223.3	2015-12-13 03:54:40
9321.3	2015-12-13 03:54:50
9620.2	2015-12-13 03:55:00
9748.4	2015-12-13 03:55:10
9940	2015-12-13 03:55:20
9748.3	2015-12-13 03:55:30
9697.6	2015-12-13 03:55:40
9681.5	2015-12-13 03:55:50
9704.6	2015-12-13 03:56:00
9899.4	2015-12-13 03:56:10
9879.4	2015-12-13 03:56:20
9900	2015-12-13 03:56:30
10246	2015-12-13 03:56:40
10180	2015-12-13 03:56:50
10435	2015-12-13 03:57:00
10376	2015-12-13 03:57:10
10242	2015-12-13 03:57:20
9933.7	2015-12-13 03:57:30
9649.4	2015-12-13 03:57:40
9691	2015-12-13 03:57:50
9853.1	2015-12-13 03:58:00
10480	2015-12-13 03:58:10
10452	2015-12-13 03:58:20
10164	2015-12-13 03:58:30
10501	2015-12-13 03:58:40
10555	2015-12-13 03:58:50
10758	2015-12-13 03:59:00
10602	2015-12-13 03:59:10
10211	2015-12-13 03:59:20
10244	2015-12-13 03:59:30
10396	2015-12-13 03:59:40
10218	2015-12-13 03:59:50
10300	2015-12-13 04:00:00
10317	2015-12-13 04:00:10
10032	2015-12-13 04:00:20
9911.1	2015-12-13 04:00:30
9679.1	2015-12-13 04:00:40
9755.5	2015-12-13 04:00:50
9845.6	2015-12-13 04:01:00
	2015-12-13 04:01:10
	2015-12-13 04:01:35
	2015-12-13 04:01:59
	2015-12-13 04:02:23
	2015-12-13 04:02:47
	2015-12-13 04:03:11
	2015-12-13 04:03:29
10062	2015-12-13 04:03:30
10046	2015-12-13 04:03:40
10235	2015-12-13 04:03:50
10252	2015-12-13 04:04:00
10371	2015-12-13 04:04:10
10232	2015-12-13 04:04:20
9785	2015-12-13 04:04:30
10209	2015-12-13 04:04:40
10337	2015-12-13 04:04:50
10226	2015-12-13 04:05:00
10298	2015-12-13 04:05:10
10368	2015-12-13 04:05:20
10353	2015-12-13 04:05:30
10194	2015-12-13 04:05:40
10052	2015-12-13 04:05:50
10205	2015-12-13 04:06:00
10118	2015-12-13 04:06:10
9935.9	2015-12-13 04:06:20
10221	2015-12-13 04:06:30
10241	2015-12-13 04:06:40
10246	2015-12-13 04:06:50
10445	2015-12-13 04:07:00
10697	2015-12-13 04:07:10
10430	2015-12-13 04:07:20
10552	2015-12-13 04:07:30
10403	2015-12-13 04:07:40
10397	2015-12-13 04:07:50
10501	2015-12-13 04:08:00
10743	2015-12-13 04:08:10
10446	2015-12-13 04:08:20
10399	2015-12-13 04:08:30
10372	2015-12-13 04:08:40
10204	2015-12-13 04:08:50
10302	2015-12-13 04:09:00
10235	2015-12-13 04:09:10
10003	2015-12-13 04:09:20
10258	2015-12-13 04:09:30
10061	2015-12-13 04:09:40
10256	2015-12-13 04:09:50
10425	2015-12-13 04:10:00
10072	2015-12-13 04:10:10
10177	2015-12-13 04:10:20
10346	2015-12-13 04:10:30
9998.6	2015-12-13 04:10:40
10088	2015-12-13 04:10:50
9873.5	2015-12-13 04:11:00
	2015-12-13 04:11:10
	2015-12-13 04:11:34
	2015-12-13 04:11:59
	2015-12-13 04:12:23
	2015-12-13 04:12:47
	2015-12-13 04:13:11
	2015-12-13 04:13:27
9390	2015-12-13 04:13:30
9620.3	2015-12-13 04:13:40
9667.7	2015-12-13 04:13:50
9841.6	2015-12-13 04:14:00
10070	2015-12-13 04:14:10
10445	2015-12-13 04:14:20
10601	2015-12-13 04:14:30
10492	2015-12-13 04:14:40
10467	2015-12-13 04:14:50
10459	2015-12-13 04:15:00
10415	2015-12-13 04:15:10
10161	2015-12-13 04:15:20
10083	2015-12-13 04:15:30
10085	2015-12-13 04:15:40
10022	2015-12-13 04:15:50
10114	2015-12-13 04:16:00
10180	2015-12-13 04:16:10
10056	2015-12-13 04:16:20
10039	2015-12-13 04:16:30
10355	2015-12-13 04:16:40
9985.5	2015-12-13 04:16:50
9844.9	2015-12-13 04:17:00
9853.9	2015-12-13 04:17:10
10029	2015-12-13 04:17:20
10121	2015-12-13 04:17:30
10224	2015-12-13 04:17:40
10366	2015-12-13 04:17:50
10159	2015-12-13 04:18:00
10125	2015-12-13 04:18:10
10035	2015-12-13 04:18:20
9929.6	2015-12-13 04:18:30
9981	2015-12-13 04:18:40
10038	2015-12-13 04:18:50
10114	2015-12-13 04:19:00
9877.7	2015-12-13 04:19:10
9669.9	2015-12-13 04:19:20
9672	2015-12-13 04:19:30
9579	2015-12-13 04:19:40
9580.3	2015-12-13 04:19:50
9550.3	2015-12-13 04:20:00
9550.7	2015-12-13 04:20:10
9471.5	2015-12-13 04:20:20
9754	2015-12-13 04:20:30
9884.1	2015-12-13 04:20:40
9894	2015-12-13 04:20:50
9862.6	2015-12-13 04:21:00
	2015-12-13 04:21:10
	2015-12-13 04:21:34
	2015-12-13 04:21:59
	2015-12-13 04:22:23
	2015-12-13 04:22:47
	2015-12-13 04:23:11
	2015-12-13 04:23:36
	2015-12-13 04:24:00
	2015-12-13 04:24:24
	2015-12-13 04:24:34
9410.2	2015-12-13 04:24:40
9215.9	2015-12-13 04:24:50
8947.1	2015-12-13 04:25:00
8960.7	2015-12-13 04:25:10
8896.4	2015-12-13 04:25:20
9038.1	2015-12-13 04:25:30
9768	2015-12-13 04:25:40
9770.4	2015-12-13 04:25:50
9506.8	2015-12-13 04:26:00
9109.7	2015-12-13 04:26:10
9451.9	2015-12-13 04:26:20
9572.6	2015-12-13 04:26:30
9485.1	2015-12-13 04:26:40
9614.5	2015-12-13 04:26:50
9678	2015-12-13 04:27:00
9693	2015-12-13 04:27:10
9644.6	2015-12-13 04:27:20
9466.5	2015-12-13 04:27:30
9413.3	2015-12-13 04:27:40
9242.6	2015-12-13 04:27:50
9403.6	2015-12-13 04:28:00
9664.2	2015-12-13 04:28:10
9714.7	2015-12-13 04:28:20
9752.9	2015-12-13 04:28:30
9544.5	2015-12-13 04:28:40
9575.2	2015-12-13 04:28:50
9771.5	2015-12-13 04:29:00
9850.5	2015-12-13 04:29:10
9716.2	2015-12-13 04:29:20
9462.9	2015-12-13 04:29:30
9755.1	2015-12-13 04:29:40
9857.4	2015-12-13 04:29:50
9677.9	2015-12-13 04:30:00
9666.8	2015-12-13 04:30:10
9693.3	2015-12-13 04:30:20
10042	2015-12-13 04:30:30
10219	2015-12-13 04:30:40
9981	2015-12-13 04:30:50
9868.3	2015-12-13 04:31:00
	2015-12-13 04:31:10
	2015-12-13 04:31:38
	2015-12-13 04:32:02
	2015-12-13 04:32:26
	2015-12-13 04:32:50
	2015-12-13 04:33:15
9472.3	2015-12-13 04:33:30
9434.5	2015-12-13 04:33:40
9477	2015-12-13 04:33:50
9639.2	2015-12-13 04:34:00
9125.9	2015-12-13 04:34:10
8847.3	2015-12-13 04:34:20
8847.1	2015-12-13 04:34:30
8792.2	2015-12-13 04:34:40
8878.9	2015-12-13 04:34:50
9506	2015-12-13 04:35:00
9442.7	2015-12-13 04:35:10
9357.1	2015-12-13 04:35:20
9677.4	2015-12-13 04:35:30
	2015-12-13 04:35:40
9516.2	2015-12-13 04:35:50
9033.8	2015-12-13 04:36:00
9711.5	2015-12-13 04:36:10
8630.38	2015-12-13 04:36:20
8563.16	2015-12-13 04:36:30
8216.71	2015-12-13 04:36:40
7774.61	2015-12-13 04:36:50
7185.53	2015-12-13 04:37:00
6543.62	2015-12-13 04:37:10
7313.43	2015-12-13 04:37:20
8688.97	2015-12-13 04:37:30
8847.98	2015-12-13 04:37:40
8716.34	2015-12-13 04:37:50
8806.14	2015-12-13 04:38:00
9111.27	2015-12-13 04:38:10
8948.24	2015-12-13 04:38:20
8784.34	2015-12-13 04:38:30
8722.44	2015-12-13 04:38:40
8729.42	2015-12-13 04:38:50
8760.8	2015-12-13 04:39:00
8832.29	2015-12-13 04:39:10
8813.98	2015-12-13 04:39:20
7836.34	2015-12-13 04:39:30
6973.77	2015-12-13 04:39:40
7162.43	2015-12-13 04:39:50
8126.04	2015-12-13 04:40:00
8536.92	2015-12-13 04:40:10
8216.88	2015-12-13 04:40:20
8328.82	2015-12-13 04:40:30
8447.04	2015-12-13 04:40:40
8602.4	2015-12-13 04:40:50
8472.67	2015-12-13 04:41:00
	2015-12-13 04:41:10
	2015-12-13 04:41:34
	2015-12-13 04:42:02
	2015-12-13 04:42:26
	2015-12-13 04:42:50
	2015-12-13 04:43:15
7688.65	2015-12-13 04:43:30
7742.79	2015-12-13 04:43:40
7505.75	2015-12-13 04:43:50
7317.09	2015-12-13 04:44:00
6687.56	2015-12-13 04:44:10
6798.71	2015-12-13 04:44:20
7143.25	2015-12-13 04:44:30
7416.65	2015-12-13 04:44:40
7511.33	2015-12-13 04:44:50
7398.51	2015-12-13 04:45:00
7339.49	2015-12-13 04:45:10
7270.01	2015-12-13 04:45:20
7400.52	2015-12-13 04:45:30
7325.46	2015-12-13 04:45:40
7444.63	2015-12-13 04:45:50
7344.9	2015-12-13 04:46:00
7498.95	2015-12-13 04:46:10
7289.19	2015-12-13 04:46:20
6839.86	2015-12-13 04:46:30
6780.84	2015-12-13 04:46:40
7077.43	2015-12-13 04:46:50
7242.64	2015-12-13 04:47:00
7299.74	2015-12-13 04:47:10
7389.36	2015-12-13 04:47:20
7733.38	2015-12-13 04:47:30
7490.4	2015-12-13 04:47:40
7059.56	2015-12-13 04:47:50
6808.82	2015-12-13 04:48:00
6763.75	2015-12-13 04:48:10
6994.69	2015-12-13 04:48:20
7377.59	2015-12-13 04:48:30
7697.11	2015-12-13 04:48:40
7750.9	2015-12-13 04:48:50
7709.49	2015-12-13 04:49:00
7832.76	2015-12-13 04:49:10
7661.1	2015-12-13 04:49:20
7635.47	2015-12-13 04:49:30
7942.17	2015-12-13 04:49:40
8167.19	2015-12-13 04:49:50
7791.44	2015-12-13 04:50:00
7294.33	2015-12-13 04:50:10
7391.8	2015-12-13 04:50:20
7641.49	2015-12-13 04:50:30
8002.59	2015-12-13 04:50:40
8231.7	2015-12-13 04:50:50
8332.66	2015-12-13 04:51:00
	2015-12-13 04:51:10
	2015-12-13 04:51:35
	2015-12-13 04:51:59
	2015-12-13 04:52:26
	2015-12-13 04:52:50
	2015-12-13 04:53:14
8493.16	2015-12-13 04:53:30
8309.99	2015-12-13 04:53:40
8058.91	2015-12-13 04:53:50
8078.53	2015-12-13 04:54:00
7926.13	2015-12-13 04:54:10
8054.73	2015-12-13 04:54:20
8228.39	2015-12-13 04:54:30
8292.99	2015-12-13 04:54:40
8270.32	2015-12-13 04:54:50
8063.01	2015-12-13 04:55:00
7890.13	2015-12-13 04:55:10
7813.76	2015-12-13 04:55:20
7850.98	2015-12-13 04:55:30
8157.25	2015-12-13 04:55:40
8352.53	2015-12-13 04:55:50
8674.32	2015-12-13 04:56:00
8544.07	2015-12-13 04:56:10
8498.74	2015-12-13 04:56:20
8576.07	2015-12-13 04:56:30
8730.29	2015-12-13 04:56:40
8814.85	2015-12-13 04:56:50
8650.87	2015-12-13 04:57:00
8591.76	2015-12-13 04:57:10
8301.8	2015-12-13 04:57:20
8202.67	2015-12-13 04:57:30
8023.6	2015-12-13 04:57:40
8188.55	2015-12-13 04:57:50
8142.52	2015-12-13 04:58:00
8091.86	2015-12-13 04:58:10
7989.51	2015-12-13 04:58:20
7870.42	2015-12-13 04:58:30
7964.06	2015-12-13 04:58:40
8014.71	2015-12-13 04:58:50
7819.16	2015-12-13 04:59:00
7849.94	2015-12-13 04:59:10
7767.03	2015-12-13 04:59:20
7676.97	2015-12-13 04:59:30
7745.06	2015-12-13 04:59:40
7837.91	2015-12-13 04:59:50
7907.04	2015-12-13 05:00:00
8123.86	2015-12-13 05:00:10
8336.49	2015-12-13 05:00:20
8410.6	2015-12-13 05:00:30
8060.65	2015-12-13 05:00:40
8373.89	2015-12-13 05:00:50
8506.15	2015-12-13 05:01:00
	2015-12-13 05:01:10
	2015-12-13 05:01:35
	2015-12-13 05:01:59
	2015-12-13 05:02:23
	2015-12-13 05:02:50
	2015-12-13 05:03:14
8273.46	2015-12-13 05:03:30
8375.64	2015-12-13 05:03:40
8369.01	2015-12-13 05:03:50
8162.83	2015-12-13 05:04:00
7976.61	2015-12-13 05:04:10
7960.74	2015-12-13 05:04:20
7909.31	2015-12-13 05:04:30
7914.36	2015-12-13 05:04:40
8036.85	2015-12-13 05:04:50
8090.12	2015-12-13 05:05:00
7996.4	2015-12-13 05:05:10
7944.96	2015-12-13 05:05:20
7748.98	2015-12-13 05:05:30
7876.18	2015-12-13 05:05:40
7998.23	2015-12-13 05:05:50
7779.84	2015-12-13 05:06:00
7936.6	2015-12-13 05:06:10
8015.93	2015-12-13 05:06:20
7984.46	2015-12-13 05:06:30
7950.37	2015-12-13 05:06:40
7696.93	2015-12-13 05:06:50
7549.69	2015-12-13 05:07:00
7532.77	2015-12-13 05:07:10
7442.72	2015-12-13 05:07:20
7254.41	2015-12-13 05:07:30
7198.26	2015-12-13 05:07:40
7134.44	2015-12-13 05:07:50
7213.26	2015-12-13 05:08:00
7284.13	2015-12-13 05:08:10
7453.87	2015-12-13 05:08:20
7256.32	2015-12-13 05:08:30
7199.31	2015-12-13 05:08:40
7300.26	2015-12-13 05:08:50
7429.99	2015-12-13 05:09:00
7602.61	2015-12-13 05:09:10
7597.55	2015-12-13 05:09:20
7579.68	2015-12-13 05:09:30
7530.07	2015-12-13 05:09:40
7287.36	2015-12-13 05:09:50
7140.11	2015-12-13 05:10:00
7102.71	2015-12-13 05:10:10
6743.79	2015-12-13 05:10:20
6604.47	2015-12-13 05:10:30
6937.59	2015-12-13 05:10:40
7294.51	2015-12-13 05:10:50
7658.84	2015-12-13 05:11:00
	2015-12-13 05:11:10
	2015-12-13 05:11:35
	2015-12-13 05:11:59
	2015-12-13 05:12:23
	2015-12-13 05:12:38
7241.85	2015-12-13 05:12:40
7019.1	2015-12-13 05:12:50
6976.82	2015-12-13 05:13:00
7233.22	2015-12-13 05:13:10
7004.02	2015-12-13 05:13:20
6856.16	2015-12-13 05:13:30
7176.29	2015-12-13 05:13:40
7193.03	2015-12-13 05:13:50
7113.96	2015-12-13 05:14:00
6805.69	2015-12-13 05:14:10
6877.17	2015-12-13 05:14:20
7134.36	2015-12-13 05:14:30
7317.79	2015-12-13 05:14:40
7190.59	2015-12-13 05:14:50
6973.42	2015-12-13 05:15:00
6887.81	2015-12-13 05:15:10
7097.92	2015-12-13 05:15:20
6876.65	2015-12-13 05:15:30
6934.8	2015-12-13 05:15:40
7005.24	2015-12-13 05:15:50
6983.36	2015-12-13 05:16:00
6959.3	2015-12-13 05:16:10
6940.12	2015-12-13 05:16:20
6785.9	2015-12-13 05:16:30
6958.51	2015-12-13 05:16:40
7193.38	2015-12-13 05:16:50
7345.42	2015-12-13 05:17:00
7646.72	2015-12-13 05:17:10
7549.86	2015-12-13 05:17:20
7556.23	2015-12-13 05:17:30
7642.19	2015-12-13 05:17:40
7441.5	2015-12-13 05:17:50
7334	2015-12-13 05:18:00
7043.69	2015-12-13 05:18:10
6992.34	2015-12-13 05:18:20
6870.98	2015-12-13 05:18:30
7024.33	2015-12-13 05:18:40
6983.88	2015-12-13 05:18:50
6921.72	2015-12-13 05:19:00
7200.53	2015-12-13 05:19:10
7382.91	2015-12-13 05:19:20
7389.01	2015-12-13 05:19:30
7489.88	2015-12-13 05:19:40
7371.58	2015-12-13 05:19:50
7628.59	2015-12-13 05:20:00
7801.46	2015-12-13 05:20:10
7686.04	2015-12-13 05:20:20
7554.66	2015-12-13 05:20:30
7442.72	2015-12-13 05:20:40
7521.35	2015-12-13 05:20:50
7364.86	2015-12-13 05:21:00
	2015-12-13 05:21:10
	2015-12-13 05:21:35
	2015-12-13 05:21:59
	2015-12-13 05:22:23
	2015-12-13 05:22:47
	2015-12-13 05:23:12
7047.26	2015-12-13 05:23:30
7025.9	2015-12-13 05:23:40
6939.68	2015-12-13 05:23:50
6808.3	2015-12-13 05:24:00
6863.49	2015-12-13 05:24:10
6627.49	2015-12-13 05:24:20
6525.4	2015-12-13 05:24:30
6676.4	2015-12-13 05:24:40
6716.41	2015-12-13 05:24:50
6612.49	2015-12-13 05:25:00
6672.56	2015-12-13 05:25:10
7011.26	2015-12-13 05:25:20
7334.79	2015-12-13 05:25:30
7426.5	2015-12-13 05:25:40
7527.46	2015-12-13 05:25:50
7468	2015-12-13 05:26:00
7525.01	2015-12-13 05:26:10
7391.71	2015-12-13 05:26:20
7297.12	2015-12-13 05:26:30
7089.72	2015-12-13 05:26:40
7012.13	2015-12-13 05:26:50
6945.78	2015-12-13 05:27:00
7119.45	2015-12-13 05:27:10
6945.35	2015-12-13 05:27:20
7058.34	2015-12-13 05:27:30
7208.2	2015-12-13 05:27:40
7370.79	2015-12-13 05:27:50
7258.68	2015-12-13 05:28:00
7459.8	2015-12-13 05:28:10
7420.31	2015-12-13 05:28:20
7440.8	2015-12-13 05:28:30
7359.2	2015-12-13 05:28:40
6993.91	2015-12-13 05:28:50
7170.71	2015-12-13 05:29:00
7562.85	2015-12-13 05:29:10
7424.32	2015-12-13 05:29:20
7233.48	2015-12-13 05:29:30
7910.7	2015-12-13 05:29:40
7822.13	2015-12-13 05:29:50
7988.47	2015-12-13 05:30:00
8409.9	2015-12-13 05:30:10
8592.28	2015-12-13 05:30:20
8315.05	2015-12-13 05:30:30
8604.14	2015-12-13 05:30:40
8963.06	2015-12-13 05:30:50
8962.19	2015-12-13 05:31:00
	2015-12-13 05:31:10
	2015-12-13 05:31:35
	2015-12-13 05:31:59
	2015-12-13 05:32:23
9115.63	2015-12-13 05:32:30
8895.06	2015-12-13 05:32:40
8856.7	2015-12-13 05:32:50
8843.62	2015-12-13 05:33:00
8757.32	2015-12-13 05:33:10
8622.88	2015-12-13 05:33:20
8311.04	2015-12-13 05:33:30
7966.93	2015-12-13 05:33:40
7897.02	2015-12-13 05:33:50
8161.35	2015-12-13 05:34:00
8441.02	2015-12-13 05:34:10
8810.5	2015-12-13 05:34:20
9099.06	2015-12-13 05:34:30
9031.94	2015-12-13 05:34:40
9090.35	2015-12-13 05:34:50
9276.91	2015-12-13 05:35:00
9284.76	2015-12-13 05:35:10
9388.5	2015-12-13 05:35:20
9261.22	2015-12-13 05:35:30
9643.94	2015-12-13 05:35:40
9779.08	2015-12-13 05:35:50
10084.2	2015-12-13 05:36:00
9961.28	2015-12-13 05:36:10
9827.9	2015-12-13 05:36:20
10047.6	2015-12-13 05:36:30
9848.82	2015-12-13 05:36:40
9614.3	2015-12-13 05:36:50
9720.66	2015-12-13 05:37:00
9884.56	2015-12-13 05:37:10
9732.87	2015-12-13 05:37:20
9871.49	2015-12-13 05:37:30
9717.18	2015-12-13 05:37:40
9699.74	2015-12-13 05:37:50
9987.44	2015-12-13 05:38:00
10269.9	2015-12-13 05:38:10
10324	2015-12-13 05:38:20
10117.3	2015-12-13 05:38:30
10217.6	2015-12-13 05:38:40
10521.9	2015-12-13 05:38:50
10033.6	2015-12-13 05:39:00
10056.3	2015-12-13 05:39:10
10178.4	2015-12-13 05:39:20
10147.8	2015-12-13 05:39:30
10075.5	2015-12-13 05:39:40
9976.1	2015-12-13 05:39:50
10052.8	2015-12-13 05:40:00
9981.33	2015-12-13 05:40:10
9609.94	2015-12-13 05:40:20
9568.1	2015-12-13 05:40:30
9416.4	2015-12-13 05:40:40
9289.12	2015-12-13 05:40:50
10025.8	2015-12-13 05:41:00
	2015-12-13 05:41:10
	2015-12-13 05:41:35
	2015-12-13 05:41:59
	2015-12-13 05:42:23
	2015-12-13 05:42:47
	2015-12-13 05:43:12
9827.02	2015-12-13 05:43:20
9793.02	2015-12-13 05:43:30
10029.3	2015-12-13 05:43:40
10327.4	2015-12-13 05:43:50
10133.9	2015-12-13 05:44:00
10110.4	2015-12-13 05:44:10
9902	2015-12-13 05:44:20
9677.07	2015-12-13 05:44:30
9846.2	2015-12-13 05:44:40
9942.98	2015-12-13 05:44:50
10072.9	2015-12-13 05:45:00
9933.39	2015-12-13 05:45:10
9545.43	2015-12-13 05:45:20
9382.4	2015-12-13 05:45:30
9047.63	2015-12-13 05:45:40
8949.99	2015-12-13 05:45:50
9083.37	2015-12-13 05:46:00
8922.96	2015-12-13 05:46:10
9019.73	2015-12-13 05:46:20
8885.47	2015-12-13 05:46:30
8814.85	2015-12-13 05:46:40
8923.83	2015-12-13 05:46:50
8902.04	2015-12-13 05:47:00
8607.28	2015-12-13 05:47:10
8674.15	2015-12-13 05:47:20
8743.37	2015-12-13 05:47:30
8686.09	2015-12-13 05:47:40
8834.03	2015-12-13 05:47:50
8902.91	2015-12-13 05:48:00
8665.69	2015-12-13 05:48:10
8177.56	2015-12-13 05:48:20
8062.75	2015-12-13 05:48:30
7949.93	2015-12-13 05:48:40
7794.23	2015-12-13 05:48:50
7984.46	2015-12-13 05:49:00
7839.65	2015-12-13 05:49:10
7923.17	2015-12-13 05:49:20
8050.19	2015-12-13 05:49:30
7967.98	2015-12-13 05:49:40
7867.98	2015-12-13 05:49:50
8095.61	2015-12-13 05:50:00
8105.9	2015-12-13 05:50:10
7866.94	2015-12-13 05:50:20
7879.32	2015-12-13 05:50:30
7712.89	2015-12-13 05:50:40
7571.13	2015-12-13 05:50:50
7735.64	2015-12-13 05:51:00
	2015-12-13 05:51:10
	2015-12-13 05:51:35
	2015-12-13 05:51:59
	2015-12-13 05:52:23
	2015-12-13 05:52:47
	2015-12-13 05:53:11
7900.15	2015-12-13 05:53:20
8117.76	2015-12-13 05:53:30
8150.01	2015-12-13 05:53:40
8195	2015-12-13 05:53:50
7764.15	2015-12-13 05:54:00
8134.06	2015-12-13 05:54:10
8026.39	2015-12-13 05:54:20
7867.11	2015-12-13 05:54:30
8027.26	2015-12-13 05:54:40
8158.47	2015-12-13 05:54:50
8182.45	2015-12-13 05:55:00
8327.25	2015-12-13 05:55:10
8217.06	2015-12-13 05:55:20
8000.85	2015-12-13 05:55:30
7916.98	2015-12-13 05:55:40
7759.79	2015-12-13 05:55:50
7441.15	2015-12-13 05:56:00
7212.91	2015-12-13 05:56:10
7302.62	2015-12-13 05:56:20
7455.62	2015-12-13 05:56:30
7332.61	2015-12-13 05:56:40
7236.18	2015-12-13 05:56:50
7292.42	2015-12-13 05:57:00
7342.72	2015-12-13 05:57:10
7196.87	2015-12-13 05:57:20
7103.06	2015-12-13 05:57:30
7105.33	2015-12-13 05:57:40
6970.63	2015-12-13 05:57:50
6998.62	2015-12-13 05:58:00
7044.39	2015-12-13 05:58:10
7111.86	2015-12-13 05:58:20
7123.11	2015-12-13 05:58:30
7227.99	2015-12-13 05:58:40
7151.79	2015-12-13 05:58:50
7251.35	2015-12-13 05:59:00
7274.98	2015-12-13 05:59:10
7250.39	2015-12-13 05:59:20
7138.02	2015-12-13 05:59:30
6860.35	2015-12-13 05:59:40
6765.49	2015-12-13 05:59:50
6856.51	2015-12-13 06:00:00
7110.21	2015-12-13 06:00:10
7298.52	2015-12-13 06:00:20
7256.06	2015-12-13 06:00:30
7202.71	2015-12-13 06:00:40
7418.57	2015-12-13 06:00:50
7811.49	2015-12-13 06:01:00
	2015-12-13 06:01:10
	2015-12-13 06:01:35
	2015-12-13 06:01:59
	2015-12-13 06:02:23
	2015-12-13 06:02:47
	2015-12-13 06:03:12
8434.22	2015-12-13 06:03:20
8523.76	2015-12-13 06:03:30
8353.23	2015-12-13 06:03:40
8136.85	2015-12-13 06:03:50
8087.68	2015-12-13 06:04:00
8129.26	2015-12-13 06:04:10
8063.27	2015-12-13 06:04:20
8652.79	2015-12-13 06:04:30
8576.85	2015-12-13 06:04:40
8426.73	2015-12-13 06:04:50
8528.12	2015-12-13 06:05:00
8687.48	2015-12-13 06:05:10
9244.66	2015-12-13 06:05:20
9580.3	2015-12-13 06:05:30
9599.48	2015-12-13 06:05:40
10256	2015-12-13 06:05:50
10464.3	2015-12-13 06:06:00
10388.5	2015-12-13 06:06:10
10459.1	2015-12-13 06:06:20
10212.4	2015-12-13 06:06:30
10385.9	2015-12-13 06:06:40
10310	2015-12-13 06:06:50
10065.9	2015-12-13 06:07:00
10037.1	2015-12-13 06:07:10
10127.8	2015-12-13 06:07:20
10121.7	2015-12-13 06:07:30
10357.1	2015-12-13 06:07:40
10356.2	2015-12-13 06:07:50
10283	2015-12-13 06:08:00
10347.5	2015-12-13 06:08:10
10380.6	2015-12-13 06:08:20
10209.7	2015-12-13 06:08:30
10021.4	2015-12-13 06:08:40
9785.18	2015-12-13 06:08:50
9856.67	2015-12-13 06:09:00
10196.7	2015-12-13 06:09:10
9952.56	2015-12-13 06:09:20
10033.6	2015-12-13 06:09:30
9943.85	2015-12-13 06:09:40
10101.6	2015-12-13 06:09:50
9930.77	2015-12-13 06:10:00
10112.1	2015-12-13 06:10:10
10172.3	2015-12-13 06:10:20
10215.9	2015-12-13 06:10:30
10045	2015-12-13 06:10:40
10171.4	2015-12-13 06:10:50
[truncated: 51,750 more rows]

## Sheet: DPM
Dew point temperature	Date and time	Relative humidity [%]
-0.33	2015-12-13	93.35
-0.05	2015-12-13 00:10:00	94.38
-0.16	2015-12-13 00:20:00	95.11
-0.25	2015-12-13 00:30:00	95.36
-0.35	2015-12-13 00:40:00	95.68
-0.17	2015-12-13 00:50:00	96.34
-0.51	2015-12-13 01:00:00	95.09
-0.65	2015-12-13 01:10:00	93.29
-1.08	2015-12-13 01:20:00	92.3
-1.03	2015-12-13 01:30:00	94.24
-0.56	2015-12-13 01:40:00	97.35
-0.83	2015-12-13 01:50:00	97.37
-0.66	2015-12-13 02:00:00	95.39
-0.61	2015-12-13 02:10:00	94.59
-0.76	2015-12-13 02:20:00	94.61
-0.9	2015-12-13 02:30:00	94.27
-1	2015-12-13 02:40:00	96.22
-1	2015-12-13 02:50:00	94.79
-0.8	2015-12-13 03:00:00	96.62
-1.3	2015-12-13 03:10:00	96.3
-0.81	2015-12-13 03:20:00	95.61
-1.06	2015-12-13 03:30:00	96.7
-0.93	2015-12-13 03:40:00	94.96
-1.01	2015-12-13 03:50:00	96.39
-0.71	2015-12-13 04:00:00	96.84
-0.49	2015-12-13 04:10:00	96.99
-0.55	2015-12-13 04:20:00	98.05
-0.34	2015-12-13 04:30:00	97.49
0.08	2015-12-13 04:40:00	93.61
-0.09	2015-12-13 04:50:00	96.33
-0.38	2015-12-13 05:00:00	94.93
-0.61	2015-12-13 05:10:00	94.91
0.17	2015-12-13 05:20:00	94.01
0.36	2015-12-13 05:30:00	96.02
0.43	2015-12-13 05:40:00	94.12
0.53	2015-12-13 05:50:00	91.28
0.6	2015-12-13 06:00:00	92.38
-0.13	2015-12-13 06:10:00	90.23
-0.08	2015-12-13 06:20:00	90.55
0.13	2015-12-13 06:30:00	91.74
0.32	2015-12-13 06:40:00	91.91
0.65	2015-12-13 06:50:00	92.84
0.5	2015-12-13 07:00:00	91.07
0.15	2015-12-13 07:10:00	85.86
0.31	2015-12-13 07:20:00	88.18
0.73	2015-12-13 07:30:00	91.38
0.67	2015-12-13 07:40:00	90.7
0.23	2015-12-13 07:50:00	91.31
0.03	2015-12-13 08:00:00	88.57
0.11	2015-12-13 08:10:00	87.87
-0.12	2015-12-13 08:20:00	88.59
0.03	2015-12-13 08:30:00	85.22
0.05	2015-12-13 08:40:00	84.39
0.17	2015-12-13 08:50:00	76.95
0.7	2015-12-13 09:00:00	72.96
0.96	2015-12-13 09:10:00	71.35
0.57	2015-12-13 09:20:00	71.44
0.45	2015-12-13 09:30:00	67.08
0.86	2015-12-13 09:40:00	60.37
1.41	2015-12-13 09:50:00	61.51
1.47	2015-12-13 10:00:00	62.27
1.79	2015-12-13 10:10:00	63.63
1.86	2015-12-13 10:20:00	62.72
1.31	2015-12-13 10:30:00	63.07
0.66	2015-12-13 10:40:00	62.73
1.06	2015-12-13 10:50:00	60.62
0.65	2015-12-13 11:00:00	62.16
0.36	2015-12-13 11:10:00	60
0.76	2015-12-13 11:20:00	54.28
0.03	2015-12-13 11:30:00	56.67
0.42	2015-12-13 11:40:00	48.4
-0.03	2015-12-13 11:50:00	48.4
0.04	2015-12-13 12:00:00	46.07
0.41	2015-12-13 12:10:00	47.07
0.36	2015-12-13 12:20:00	48.29
-0.11	2015-12-13 12:30:00	53.5
-0.1	2015-12-13 12:40:00	50.86
-0.12	2015-12-13 12:50:00	54.32
0.47	2015-12-13 13:00:00	57.21
0.2	2015-12-13 13:10:00	53.21
0.53	2015-12-13 13:20:00	53.56
-0.24	2015-12-13 13:30:00	53.89
0.17	2015-12-13 13:40:00	52.23
-0.05	2015-12-13 13:50:00	52.66
0.65	2015-12-13 14:00:00	56.84
0.94	2015-12-13 14:10:00	60.21
0.96	2015-12-13 14:20:00	60.16
0.91	2015-12-13 14:30:00	63.25
0.58	2015-12-13 14:40:00	61.55
0.89	2015-12-13 14:50:00	65.05
0.96	2015-12-13 15:00:00	70.65
1.22	2015-12-13 15:10:00	73.76
1.14	2015-12-13 15:20:00	77.15
0.96	2015-12-13 15:30:00	77.24
0.84	2015-12-13 15:40:00	79
0.68	2015-12-13 15:50:00	80.27
0.66	2015-12-13 16:00:00	79.84
0.71	2015-12-13 16:10:00	79.56
0.63	2015-12-13 16:20:00	78.92
0.61	2015-12-13 16:30:00	79.83
0.63	2015-12-13 16:40:00	82.15
0.73	2015-12-13 16:50:00	83.34
0.71	2015-12-13 17:00:00	84.07
0.7	2015-12-13 17:10:00	85.1
0.8	2015-12-13 17:20:00	84.14
0.75	2015-12-13 17:30:00	82.32
0.51	2015-12-13 17:40:00	82.01
0.39	2015-12-13 17:50:00	80.44
0.33	2015-12-13 18:00:00	80.02
0.26	2015-12-13 18:10:00	81.72
0.43	2015-12-13 18:20:00	82.27
0.37	2015-12-13 18:30:00	81.73
0.35	2015-12-13 18:40:00	83.94
0.28	2015-12-13 18:50:00	83.92
0	2015-12-13 19:00:00	82.62
0.02	2015-12-13 19:10:00	86.24
-0.03	2015-12-13 19:20:00	85.69
-0.06	2015-12-13 19:30:00	84.94
-0.15	2015-12-13 19:40:00	86.51
-0.13	2015-12-13 19:50:00	86.56
-0.06	2015-12-13 20:00:00	86.1
-0.11	2015-12-13 20:10:00	88.14
-0.24	2015-12-13 20:20:00	89.11
-0.2	2015-12-13 20:30:00	90.06
-0.15	2015-12-13 20:40:00	91.33
-0.1	2015-12-13 20:50:00	89.77
-0.17	2015-12-13 21:00:00	88.45
0.03	2015-12-13 21:10:00	88.9
0.05	2015-12-13 21:20:00	89.93
-0.12	2015-12-13 21:30:00	89.88
-0.23	2015-12-13 21:40:00	90.8
-0.35	2015-12-13 21:50:00	90.91
-0.27	2015-12-13 22:00:00	92.8
-0.1	2015-12-13 22:10:00	92.11
-0.13	2015-12-13 22:20:00	92.6
-0.14	2015-12-13 22:30:00	92.92
-0.29	2015-12-13 22:40:00	92.55
-0.15	2015-12-13 22:50:00	93.31
-0.51	2015-12-13 23:00:00	92.91
-0.51	2015-12-13 23:10:00	92.67
-0.68	2015-12-13 23:20:00	94.71
-0.76	2015-12-13 23:30:00	93.98
-0.54	2015-12-13 23:40:00	94.32
-0.27	2015-12-13 23:50:00	94.84
-0.42	2015-12-14	90.6
-0.31	2015-12-14 00:10:00	94.31
-0.52	2015-12-14 00:20:00	95.52
-0.68	2015-12-14 00:30:00	95.25
-0.58	2015-12-14 00:40:00	95.97
-0.5	2015-12-14 00:50:00	95.83
-0.47	2015-12-14 01:00:00	97.17
-0.71	2015-12-14 01:10:00	96.41
-0.55	2015-12-14 01:20:00	97.09
-0.91	2015-12-14 01:30:00	95.7
-0.98	2015-12-14 01:40:00	97.18
-1.03	2015-12-14 01:50:00	95.22
-1	2015-12-14 02:00:00	96.33
-1.32	2015-12-14 02:10:00	95.96
-1.39	2015-12-14 02:20:00	95.87
-1.34	2015-12-14 02:30:00	95.3
-1.11	2015-12-14 02:40:00	96.36
-1.19	2015-12-14 02:50:00	96.7
-1.2	2015-12-14 03:00:00	97.53
-1.63	2015-12-14 03:10:00	98.12
-1.5	2015-12-14 03:20:00	98.11
-1.23	2015-12-14 03:30:00	99.86
-1.16	2015-12-14 03:40:00	101.16
-1.04	2015-12-14 03:50:00	102.1
-1.05	2015-12-14 04:00:00	102.28
-0.99	2015-12-14 04:10:00	102.86
-0.87	2015-12-14 04:20:00	104.12
-0.88	2015-12-14 04:30:00	100.99
-0.98	2015-12-14 04:40:00	103.69
-1.02	2015-12-14 04:50:00	102.35
-1.11	2015-12-14 05:00:00	102.03
-1.28	2015-12-14 05:10:00	101.54
-1.37	2015-12-14 05:20:00	101.63
-1.23	2015-12-14 05:30:00	102.3
-1.21	2015-12-14 05:40:00	100
-1.15	2015-12-14 05:50:00	102.1
-1.06	2015-12-14 06:00:00	101.69
-1.14	2015-12-14 06:10:00	100.89
-1.2	2015-12-14 06:20:00	99.62
-1.57	2015-12-14 06:30:00	102.21
-1.45	2015-12-14 06:40:00	103.28
-1.46	2015-12-14 06:50:00	99.74
-1.55	2015-12-14 07:00:00	102.5
-1.43	2015-12-14 07:10:00	100.23
-1.4	2015-12-14 07:20:00	100.15
-1.2	2015-12-14 07:30:00	97.9
-1.02	2015-12-14 07:40:00	98.56
-0.72	2015-12-14 07:50:00	97.52
-0.85	2015-12-14 08:00:00	100.73
-0.57	2015-12-14 08:10:00	100.33
-0.47	2015-12-14 08:20:00	95.61
-0.56	2015-12-14 08:30:00	99.82
-0.45	2015-12-14 08:40:00	98.09
-0.39	2015-12-14 08:50:00	98.98
-0.24	2015-12-14 09:00:00	96.88
-0.25	2015-12-14 09:10:00	97.46
-0.49	2015-12-14 09:20:00	100.78
-0.43	2015-12-14 09:30:00	98.7
-0.64	2015-12-14 09:40:00	101.11
-0.23	2015-12-14 09:50:00	97.28
-0.04	2015-12-14 10:00:00	96.11
0.03	2015-12-14 10:10:00	97.2
-0.04	2015-12-14 10:20:00	98.43
-0.1	2015-12-14 10:30:00	98.85
0	2015-12-14 10:40:00	96.76
0.08	2015-12-14 10:50:00	95.3
-0.1	2015-12-14 11:00:00	96.59
-0.22	2015-12-14 11:10:00	87.09
-0.13	2015-12-14 11:20:00	90.46
0	2015-12-14 11:30:00	91.53
-0.16	2015-12-14 11:40:00	91.31
-0.12	2015-12-14 11:50:00	94.46
-0.54	2015-12-14 12:00:00	92.11
-0.19	2015-12-14 12:10:00	88.07
-0.31	2015-12-14 12:20:00	87.78
-0.45	2015-12-14 12:30:00	92.66
-0.08	2015-12-14 12:40:00	86
-0.15	2015-12-14 12:50:00	84.95
-0.19	2015-12-14 13:00:00	88.64
-0.1	2015-12-14 13:10:00	88.42
-0.02	2015-12-14 13:20:00	82.47
-0.18	2015-12-14 13:30:00	87.58
-0.16	2015-12-14 13:40:00	84.13
-0.22	2015-12-14 13:50:00	86.05
-0.13	2015-12-14 14:00:00	84.38
-0.3	2015-12-14 14:10:00	84.7
-0.19	2015-12-14 14:20:00	87.73
-0.14	2015-12-14 14:30:00	90.08
-0.14	2015-12-14 14:40:00	91
-0.12	2015-12-14 14:50:00	90.6
-0.08	2015-12-14 15:00:00	91.45
-0.1	2015-12-14 15:10:00	95.73
-0.16	2015-12-14 15:20:00	96.99
-0.19	2015-12-14 15:30:00	98.18
-0.34	2015-12-14 15:40:00	98.75
-0.31	2015-12-14 15:50:00	100.13
-0.31	2015-12-14 16:00:00	98.29
-0.4	2015-12-14 16:10:00	99.32
-0.32	2015-12-14 16:20:00	100.58
-0.23	2015-12-14 16:30:00	100.98
-0.19	2015-12-14 16:40:00	102.19
-0.22	2015-12-14 16:50:00	100.87
-0.15	2015-12-14 17:00:00	100.21
0.05	2015-12-14 17:10:00	100.15
-0.01	2015-12-14 17:20:00	100.9
0	2015-12-14 17:30:00	100.53
0.18	2015-12-14 17:40:00	102.09
0	2015-12-14 17:50:00	99.88
0.12	2015-12-14 18:00:00	101.35
-0.11	2015-12-14 18:10:00	99.59
-0.11	2015-12-14 18:20:00	100.22
-0.31	2015-12-14 18:30:00	100.81
-0.57	2015-12-14 18:40:00	102.05
-0.51	2015-12-14 18:50:00	101.44
-0.55	2015-12-14 19:00:00	99.84
-0.35	2015-12-14 19:10:00	100.5
-0.36	2015-12-14 19:20:00	100.76
-0.34	2015-12-14 19:30:00	101.8
-0.35	2015-12-14 19:40:00	101.47
-0.44	2015-12-14 19:50:00	101.42
-0.54	2015-12-14 20:00:00	101.77
-0.52	2015-12-14 20:10:00	102.33
-0.64	2015-12-14 20:20:00	101.33
-0.59	2015-12-14 20:30:00	100.4
-1.02	2015-12-14 20:40:00	99.48
-0.98	2015-12-14 20:50:00	95.27
-0.77	2015-12-14 21:00:00	99.15
-0.58	2015-12-14 21:10:00	98.46
-0.32	2015-12-14 21:20:00	100.3
-0.36	2015-12-14 21:30:00	98.58
-0.45	2015-12-14 21:40:00	99.35
-0.42	2015-12-14 21:50:00	95.59
-0.42	2015-12-14 22:00:00	98.6
-0.34	2015-12-14 22:10:00	95.98
-0.35	2015-12-14 22:20:00	98.82
-0.39	2015-12-14 22:30:00	97.47
-0.34	2015-12-14 22:40:00	100.22
-0.43	2015-12-14 22:50:00	98.27
-0.39	2015-12-14 23:00:00	99.16
-0.24	2015-12-14 23:10:00	98.11
-0.19	2015-12-14 23:20:00	99.67
-0.28	2015-12-14 23:30:00	99.62
-0.32	2015-12-14 23:40:00	101.06
-0.34	2015-12-14 23:50:00	100.05
-0.34	2015-12-15	100.62
-0.43	2015-12-15 00:10:00	97.98
-0.28	2015-12-15 00:20:00	100.73
-0.42	2015-12-15 00:30:00	97.57
-0.64	2015-12-15 00:40:00	98.83
-0.36	2015-12-15 00:50:00	99.98
-0.27	2015-12-15 01:00:00	103
-0.21	2015-12-15 01:10:00	99.73
-0.24	2015-12-15 01:20:00	99.67
-0.2	2015-12-15 01:30:00	100.71
-0.22	2015-12-15 01:40:00	97.84
-0.31	2015-12-15 01:50:00	100.17
-0.38	2015-12-15 02:00:00	99.95
-0.52	2015-12-15 02:10:00	98.06
-0.7	2015-12-15 02:20:00	97.95
-0.59	2015-12-15 02:30:00	99.02
-0.67	2015-12-15 02:40:00	98.92
-0.74	2015-12-15 02:50:00	97.39
-0.74	2015-12-15 03:00:00	99.6
-0.8	2015-12-15 03:10:00	100.48
-0.98	2015-12-15 03:20:00	100.49
-0.87	2015-12-15 03:30:00	99.18
-0.73	2015-12-15 03:40:00	99.49
-0.84	2015-12-15 03:50:00	99.08
-0.84	2015-12-15 04:00:00	100.51
-0.84	2015-12-15 04:10:00	99.45
-0.97	2015-12-15 04:20:00	99.73
-0.95	2015-12-15 04:30:00	100.03
-0.89	2015-12-15 04:40:00	98.65
-0.91	2015-12-15 04:50:00	98.55
-1.01	2015-12-15 05:00:00	99.23
-0.99	2015-12-15 05:10:00	97.98
-0.9	2015-12-15 05:20:00	99.67
-0.93	2015-12-15 05:30:00	98.59
-1.08	2015-12-15 05:40:00	98.57
-1.08	2015-12-15 05:50:00	97.88
-2.01	2015-12-15 06:00:00	95.83
-2.02	2015-12-15 06:10:00	96.69
-2.13	2015-12-15 06:20:00	94.61
-2.4	2015-12-15 06:30:00	95.66
-2.07	2015-12-15 06:40:00	94.81
-2.51	2015-12-15 06:50:00	94.6
-2.28	2015-12-15 07:00:00	95.1
-2.1	2015-12-15 07:10:00	94.23
-1.73	2015-12-15 07:20:00	96.86
-1.59	2015-12-15 07:30:00	96.08
-1.52	2015-12-15 07:40:00	95.79
-1.49	2015-12-15 07:50:00	96.85
-1.39	2015-12-15 08:00:00	95.37
-1.31	2015-12-15 08:10:00	95.53
-1.3	2015-12-15 08:20:00	94.5
-1.33	2015-12-15 08:30:00	94.24
-1.03	2015-12-15 08:40:00	93.06
-0.77	2015-12-15 08:50:00	92.58
-0.9	2015-12-15 09:00:00	91.14
-0.49	2015-12-15 09:10:00	84.27
-0.51	2015-12-15 09:20:00	88.5
-0.04	2015-12-15 09:30:00	85.82
-0.27	2015-12-15 09:40:00	86.35
0.32	2015-12-15 09:50:00	82.86
0.18	2015-12-15 10:00:00	78.13
0.48	2015-12-15 10:10:00	76.44
1.46	2015-12-15 10:20:00	69.09
1.15	2015-12-15 10:30:00	66.6
1.23	2015-12-15 10:40:00	75.02
0.64	2015-12-15 10:50:00	69.47
1.06	2015-12-15 11:00:00	67.06
0.57	2015-12-15 11:10:00	68.54
0.59	2015-12-15 11:20:00	66.95
1.18	2015-12-15 11:30:00	66.07
1.29	2015-12-15 11:40:00	81.46
1.34	2015-12-15 11:50:00	76.7
0.93	2015-12-15 12:00:00	81.53
1.17	2015-12-15 12:10:00	72.87
0.92	2015-12-15 12:20:00	71.31
1.55	2015-12-15 12:30:00	74.28
1.39	2015-12-15 12:40:00	81.96
1.7	2015-12-15 12:50:00	77.77
2.02	2015-12-15 13:00:00	74.59
1.98	2015-12-15 13:10:00	73.81
1.59	2015-12-15 13:20:00	72.55
1.66	2015-12-15 13:30:00	71.27
1.5	2015-12-15 13:40:00	79.58
1.65	2015-12-15 13:50:00	72.82
1.51	2015-12-15 14:00:00	76.06
1.57	2015-12-15 14:10:00	76.76
1.74	2015-12-15 14:20:00	77.2
1.82	2015-12-15 14:30:00	76.78
1.63	2015-12-15 14:40:00	76.88
1.69	2015-12-15 14:50:00	74.33
1.85	2015-12-15 15:00:00	77.19
2.03	2015-12-15 15:10:00	77.48
2.17	2015-12-15 15:20:00	83.76
2.18	2015-12-15 15:30:00	83.89
2.01	2015-12-15 15:40:00	81.15
2.11	2015-12-15 15:50:00	82.5
2.21	2015-12-15 16:00:00	86.18
2.08	2015-12-15 16:10:00	83.78
2.15	2015-12-15 16:20:00	84.08
2.16	2015-12-15 16:30:00	83.62
2.19	2015-12-15 16:40:00	84.97
2.28	2015-12-15 16:50:00	85.45
2.23	2015-12-15 17:00:00	85.93
2.32	2015-12-15 17:10:00	88.23
2.39	2015-12-15 17:20:00	85.98
2.29	2015-12-15 17:30:00	85.87
2.34	2015-12-15 17:40:00	88.67
2.35	2015-12-15 17:50:00	89.47
2.35	2015-12-15 18:00:00	86.4
2.27	2015-12-15 18:10:00	88.85
2.29	2015-12-15 18:20:00	88.39
2.37	2015-12-15 18:30:00	87.75
2.48	2015-12-15 18:40:00	87.35
2.42	2015-12-15 18:50:00	86.41
2.41	2015-12-15 19:00:00	87.53
2.3	2015-12-15 19:10:00	86.06
2.27	2015-12-15 19:20:00	87.39
2.18	2015-12-15 19:30:00	87.54
2.18	2015-12-15 19:40:00	87.7
2.17	2015-12-15 19:50:00	86.66
2.16	2015-12-15 20:00:00	89.67
2.13	2015-12-15 20:10:00	89.08
2.05	2015-12-15 20:20:00	91.37
1.98	2015-12-15 20:30:00	91.84
1.87	2015-12-15 20:40:00	92.56
1.75	2015-12-15 20:50:00	92.6
1.7	2015-12-15 21:00:00	93.45
1.63	2015-12-15 21:10:00	92.95
1.49	2015-12-15 21:20:00	94.18
1.37	2015-12-15 21:30:00	92.72
1.41	2015-12-15 21:40:00	94.17
1.38	2015-12-15 21:50:00	94.82
1.5	2015-12-15 22:00:00	93.1
1.62	2015-12-15 22:10:00	89.86
1.51	2015-12-15 22:20:00	92.83
1.57	2015-12-15 22:30:00	91.22
1.63	2015-12-15 22:40:00	91.15
1.55	2015-12-15 22:50:00	93.86
1.57	2015-12-15 23:00:00	92.06
1.57	2015-12-15 23:10:00	93.35
1.51	2015-12-15 23:20:00	93.04
1.44	2015-12-15 23:30:00	90.53
1.54	2015-12-15 23:40:00	90.24
1.77	2015-12-15 23:50:00	89.98
2.1	2015-12-16	89.89
2.16	2015-12-16 00:10:00	88.79
2.15	2015-12-16 00:20:00	91.38
1.99	2015-12-16 00:30:00	88.24
2.16	2015-12-16 00:40:00	88.79
2.23	2015-12-16 00:50:00	88.59
2.53	2015-12-16 01:00:00	89.65
2.72	2015-12-16 01:10:00	93.14
3.05	2015-12-16 01:20:00	94.64
3.39	2015-12-16 01:30:00	96.55
3.46	2015-12-16 01:40:00	97.16
3.55	2015-12-16 01:50:00	97.87
3.63	2015-12-16 02:00:00	97.01
3.39	2015-12-16 02:10:00	96.3
3.5		96.71
3.53	2015-12-16 02:30:00	97.61
3.9	2015-12-16 02:40:00	100.62
4.06	2015-12-16 02:50:00	99.61
4.05	2015-12-16 03:00:00	98.72
3.57	2015-12-16 03:10:00	98.6
3.83	2015-12-16 03:20:00	99.43
3.91	2015-12-16 03:30:00	99.43
4.04		98.34
4.01	2015-12-16 03:50:00	99.66
4.07	2015-12-16 04:00:00	99.07
4.21	2015-12-16 04:10:00	99.12
4.21	2015-12-16 04:20:00	99.91
4.26	2015-12-16 04:30:00	100.21
4.36	2015-12-16 04:40:00	99.82
4.53	2015-12-16 04:50:00	99.38
4.74	2015-12-16 05:00:00	100.41
4.79	2015-12-16 05:10:00	100.06
4.77	2015-12-16 05:20:00	99.99
4.88	2015-12-16 05:30:00	99.11
4.85	2015-12-16 05:40:00	97.56
4.69	2015-12-16 05:50:00	93.7
4.93	2015-12-16 06:00:00	95.17
5.22	2015-12-16 06:10:00	96.92
5.23	2015-12-16 06:20:00	96.85
5.18	2015-12-16 06:30:00	96.77
5.33	2015-12-16 06:40:00	94.56
5.72	2015-12-16 06:50:00	96.25
5.62		96.13
5.81	2015-12-16 07:10:00	96.44
5.69	2015-12-16 07:20:00	93.89
5.84	2015-12-16 07:30:00	95.84
5.76		94.42
5.94	2015-12-16 07:50:00	95.12
6.18	2015-12-16 08:00:00	96.46
6.1	2015-12-16 08:10:00	94.2
6.1	2015-12-16 08:20:00	93.75
6.05	2015-12-16 08:30:00	93.71
6.48	2015-12-16 08:40:00	95.71
6.52	2015-12-16 08:50:00	96.74
6.45		91.99
6.08	2015-12-16 09:10:00	90.52
6.26	2015-12-16 09:20:00	93.09
6.22	2015-12-16 09:30:00	94.52
6.63	2015-12-16 09:40:00	94.05
6.92	2015-12-16 09:50:00	96.14
6.81	2015-12-16 10:00:00	93.37
7.11	2015-12-16 10:10:00	93.07
6.22	2015-12-16 10:20:00	87.15
6.7	2015-12-16 10:30:00	88.23
6.6	2015-12-16 10:40:00	82.72
7.06	2015-12-16 10:50:00	84.71
7.08	2015-12-16 11:00:00	84.01
7.22	2015-12-16 11:10:00	80.16
7.44	2015-12-16 11:20:00	78.04
7.17	2015-12-16 11:30:00	81.64
6.6	2015-12-16 11:40:00	79.15
6.98	2015-12-16 11:50:00	79.15
6.65	2015-12-16 12:00:00	79.22
6.29	2015-12-16 12:10:00	77.5
6.69	2015-12-16 12:20:00	80.61
6.34	2015-12-16 12:30:00	78.38
6.44	2015-12-16 12:40:00	80.79
6.73	2015-12-16 12:50:00	85.71
7.31	2015-12-16 13:00:00	85.16
6.69	2015-12-16 13:10:00	84.04
6.45	2015-12-16 13:20:00	82.29
6.55	2015-12-16 13:30:00	82.43
6.45	2015-12-16 13:40:00	80.6
6.59	2015-12-16 13:50:00	81.67
6.54	2015-12-16 14:00:00	80.53
6.64	2015-12-16 14:10:00	82.38
6.63	2015-12-16 14:20:00	81.82
6.63	2015-12-16 14:30:00	82.04
6.78	2015-12-16 14:40:00	82.61
6.79	2015-12-16 14:50:00	82.59
6.55	2015-12-16 15:00:00	80.48
6.83	2015-12-16 15:10:00	83.19
6.8	2015-12-16 15:20:00	82.86
6.7	2015-12-16 15:30:00	82.03
6.76	2015-12-16 15:40:00	82.89
6.97	2015-12-16 15:50:00	84.8
7.26	2015-12-16 16:00:00	88.25
6.96	2015-12-16 16:10:00	87.15
6.78	2015-12-16 16:20:00	86.56
6.81	2015-12-16 16:30:00	89.76
6.77	2015-12-16 16:40:00	90.01
6.8	2015-12-16 16:50:00	89.19
6.83	2015-12-16 17:00:00	88.03
6.84	2015-12-16 17:10:00	89.66
6.92	2015-12-16 17:20:00	89.65
7.04	2015-12-16 17:30:00	89.46
6.97	2015-12-16 17:40:00	89.38
7.04	2015-12-16 17:50:00	90.17
7.15	2015-12-16 18:00:00	90.49
7.12	2015-12-16 18:10:00	90.74
7.23	2015-12-16 18:20:00	92.35
7.23	2015-12-16 18:30:00	92.08
7.45	2015-12-16 18:40:00	92.97
7.55	2015-12-16 18:50:00	91.61
7.89	2015-12-16 19:00:00	93.09
8.04	2015-12-16 19:10:00	94.04
8.04	2015-12-16 19:20:00	94.24
8.21	2015-12-16 19:30:00	94.14
8.42	2015-12-16 19:40:00	93.88
8.43	2015-12-16 19:50:00	95.08
8.45	2015-12-16 20:00:00	93.64
8.61	2015-12-16 20:10:00	94.55
8.69	2015-12-16 20:20:00	94.62
8.65	2015-12-16 20:30:00	94.79
8.4	2015-12-16 20:40:00	94.09
8.24	2015-12-16 20:50:00	92.98
7.94	2015-12-16 21:00:00	94.99
7.7	2015-12-16 21:10:00	95.04
7.57	2015-12-16 21:20:00	95.42
7.72	2015-12-16 21:30:00	95.18
7.78	2015-12-16 21:40:00	95.29
7.78	2015-12-16 21:50:00	96.44
7.74	2015-12-16 22:00:00	95.01
7.6	2015-12-16 22:10:00	94.82
7.19	2015-12-16 22:20:00	96.55
7.38	2015-12-16 22:30:00	95.64
7.47	2015-12-16 22:40:00	91.06
7.36	2015-12-16 22:50:00	94.72
7.13	2015-12-16 23:00:00	96.71
6.95	2015-12-16 23:10:00	96.43
6.79	2015-12-16 23:20:00	97.1
6.87	2015-12-16 23:30:00	97.54
6.58	2015-12-16 23:40:00	98.04
6.71	2015-12-16 23:50:00	97.27
6.86	2015-12-17	98.27
7.08	2015-12-17 00:10:00	98.22
7.08	2015-12-17 00:20:00	98.12
7.37	2015-12-17 00:30:00	95.97
7.58	2015-12-17 00:40:00	91.5
7.56	2015-12-17 00:50:00	93.44
7.52	2015-12-17 01:00:00	95.36
7.39	2015-12-17 01:10:00	93.55
7.42	2015-12-17 01:20:00	91.09
7.31	2015-12-17 01:30:00	86.91
7.3	2015-12-17 01:40:00	86.22
7.32	2015-12-17 01:50:00	88.22
7.28	2015-12-17 02:00:00	93.09
7.21	2015-12-17 02:10:00	91.79
7.19	2015-12-17 02:20:00	91.36
7.2	2015-12-17 02:30:00	91.52
6.96	2015-12-17 02:40:00	94.07
6.49	2015-12-17 02:50:00	95.35
6.51	2015-12-17 03:00:00	96.71
6.35	2015-12-17 03:10:00	97.39
6.42	2015-12-17 03:20:00	97.95
6.42	2015-12-17 03:30:00	98.38
6.08	2015-12-17 03:40:00	97.46
6.3	2015-12-17 03:50:00	97.56
6.63	2015-12-17 04:00:00	94.35
6.69	2015-12-17 04:10:00	95.5
6.87	2015-12-17 04:20:00	88.43
6.8	2015-12-17 04:30:00	92.99
6.84	2015-12-17 04:40:00	91.62
6.82	2015-12-17 04:50:00	95.33
6.6	2015-12-17 05:00:00	96.81
6.72	2015-12-17 05:10:00	96.38
6.92	2015-12-17 05:20:00	87.86
6.86	2015-12-17 05:30:00	84.61
6.88	2015-12-17 05:40:00	83.94
6.84	2015-12-17 05:50:00	91.97
6.76	2015-12-17 06:00:00	93.59
6.4	2015-12-17 06:10:00	92.18
6.42	2015-12-17 06:20:00	95.5
6.08	2015-12-17 06:30:00	96.98
5.78	2015-12-17 06:40:00	95.25
6.1	2015-12-17 06:50:00	97
6.36	2015-12-17 07:00:00	96.09
6.32	2015-12-17 07:10:00	95.15
6.6	2015-12-17 07:20:00	95.48
6.88	2015-12-17 07:30:00	93.93
6.93	2015-12-17 07:40:00	93.24
7.04	2015-12-17 07:50:00	94.19
7.12	2015-12-17 08:00:00	94.46
7.23	2015-12-17 08:10:00	94.17
7.19	2015-12-17 08:20:00	92.74
6.95	2015-12-17 08:30:00	92.51
6.85	2015-12-17 08:40:00	92.27
7	2015-12-17 08:50:00	89.59
7.08	2015-12-17 09:00:00	83.48
7.29	2015-12-17 09:10:00	77.86
7.52	2015-12-17 09:20:00	78.37
7.52	2015-12-17 09:30:00	72.6
7.2	2015-12-17 09:40:00	72.96
7.07	2015-12-17 09:50:00	75.3
7.13	2015-12-17 10:00:00	74.69
7.25	2015-12-17 10:10:00	67.3
7.04	2015-12-17 10:20:00	66.09
7.15	2015-12-17 10:30:00	66.86
7.44	2015-12-17 10:40:00	60.58
7.16	2015-12-17 10:50:00	63.28
7.12	2015-12-17 11:00:00	64.22
7.3	2015-12-17 11:10:00	56.71
7.32	2015-12-17 11:20:00	57.64
7.39	2015-12-17 11:30:00	54.97
7.41	2015-12-17 11:40:00	54.09
7.29	2015-12-17 11:50:00	56.57
7.22	2015-12-17 12:00:00	54.82
7.61	2015-12-17 12:10:00	55.1
7.88	2015-12-17 12:20:00	53.55
7.64	2015-12-17 12:30:00	53.19
7.45	2015-12-17 12:40:00	57.34
7.12	2015-12-17 12:50:00	57.24
7.1		57.85
6.96	2015-12-17 13:10:00	60.56
6.78	2015-12-17 13:20:00	60.55
6.94	2015-12-17 13:30:00	57.38
7.15	2015-12-17 13:40:00	59.09
6.63	2015-12-17 13:50:00	64.07
7.57	2015-12-17 14:00:00	62.61
7.74	2015-12-17 14:10:00	66.27
7.33	2015-12-17 14:20:00	64.01
7.63	2015-12-17 14:30:00	68.64
7.52	2015-12-17 14:40:00	69.17
7.43	2015-12-17 14:50:00	74.59
7.23	2015-12-17 15:00:00	77.88
7.15	2015-12-17 15:10:00	77.28
7.01	2015-12-17 15:20:00	77.6
7.15	2015-12-17 15:30:00	79.74
6.98	2015-12-17 15:40:00	85.27
6.9	2015-12-17 15:50:00	87.12
6.78	2015-12-17 16:00:00	88.67
6.75	2015-12-17 16:10:00	88.92
6.8	2015-12-17 16:20:00	89.74
6.55	2015-12-17 16:30:00	87.67
6.19	2015-12-17 16:40:00	84.1
6.53	2015-12-17 16:50:00	91.18
6.31	2015-12-17 17:00:00	92.46
6.25	2015-12-17 17:10:00	92.89
6.54	2015-12-17 17:20:00	91.53
6.24	2015-12-17 17:30:00	93.21
6.28	2015-12-17 17:40:00	93.57
6.22	2015-12-17 17:50:00	93.28
6.16	2015-12-17 18:00:00	94.56
6.1	2015-12-17 18:10:00	94.75
6.01	2015-12-17 18:20:00	94.51
5.6	2015-12-17 18:30:00	95.73
5.54	2015-12-17 18:40:00	96.16
5.65	2015-12-17 18:50:00	96.93
5.45	2015-12-17 19:00:00	97.62
5.35	2015-12-17 19:10:00	97.81
5.35	2015-12-17 19:20:00	97.24
5.3	2015-12-17 19:30:00	98.17
5.66		96.63
5.41	2015-12-17 19:50:00	97.03
5.25	2015-12-17 20:00:00	97.29
5.45	2015-12-17 20:10:00	97.9
5.27	2015-12-17 20:20:00	97.73
5.1	2015-12-17 20:30:00	99
5.26	2015-12-17 20:40:00	98.17
5.03	2015-12-17 20:50:00	98.28
4.92	2015-12-17 21:00:00	98.17
4.84	2015-12-17 21:10:00	98.94
5.28	2015-12-17 21:20:00	99.03
5.18	2015-12-17 21:30:00	99.97
5.15	2015-12-17 21:40:00	98.7
4.91	2015-12-17 21:50:00	98.75
4.9	2015-12-17 22:00:00	97.96
4.63	2015-12-17 22:10:00	99.3
4.8	2015-12-17 22:20:00	98.38
4.09	2015-12-17 22:30:00	100.09
4.44	2015-12-17 22:40:00	100.07
3.74	2015-12-17 22:50:00	99.21
3.84	2015-12-17 23:00:00	99.82
4.15	2015-12-17 23:10:00	98.92
4.71	2015-12-17 23:20:00	99.44
4.55	2015-12-17 23:30:00	99.64
4.48	2015-12-17 23:40:00	100.42
4.63	2015-12-17 23:50:00	99.73
4.65	2015-12-18	100.87
4.32	2015-12-18 00:10:00	100.12
4.5	2015-12-18 00:20:00	100.27
4.76	2015-12-18 00:30:00	100.36
4.87	2015-12-18 00:40:00	100.93
4.82	2015-12-18 00:50:00	101.09
4.8	2015-12-18 01:00:00	101.14
4.72	2015-12-18 01:10:00	100.63
4.87	2015-12-18 01:20:00	101.06
4.91	2015-12-18 01:30:00	101.53
4.79	2015-12-18 01:40:00	100.97
4.69	2015-12-18 01:50:00	100.69
4.73	2015-12-18 02:00:00	100.81
4.75	2015-12-18 02:10:00	101.27
4.72	2015-12-18 02:20:00	101.3
4.69	2015-12-18 02:30:00	101.26
4.61	2015-12-18 02:40:00	100.75
4.66	2015-12-18 02:50:00	100.25
4.69	2015-12-18 03:00:00	100.25
4.72	2015-12-18 03:10:00	100.78
4.55	2015-12-18 03:20:00	100.33
4.54	2015-12-18 03:30:00	100.07
4.57	2015-12-18 03:40:00	100.04
4.57	2015-12-18 03:50:00	100.43
4.54	2015-12-18 04:00:00	100.33
4.49	2015-12-18 04:10:00	98.77
4.51		98.64
4.61	2015-12-18 04:30:00	98.46
4.64	2015-12-18 04:40:00	97.49
4.75	2015-12-18 04:50:00	98.6
4.99	2015-12-18 05:00:00	96.4
5.08	2015-12-18 05:10:00	98.02
5.23	2015-12-18 05:20:00	96.99
5.41	2015-12-18 05:30:00	98.07
5.42	2015-12-18 05:40:00	96.95
5.47	2015-12-18 05:50:00	97.58
5.35	2015-12-18 06:00:00	95.52
5.24	2015-12-18 06:10:00	96.55
4.87	2015-12-18 06:20:00	98.73
5.02	2015-12-18 06:30:00	97.46
5.18	2015-12-18 06:40:00	98.75
5.47	2015-12-18 06:50:00	98.15
5.61	2015-12-18 07:00:00	93.23
5.08	2015-12-18 07:10:00	98.63
5.04	2015-12-18 07:20:00	97.6
5.18	2015-12-18 07:30:00	96.06
4.99	2015-12-18 07:40:00	96.94
5.07	2015-12-18 07:50:00	96.2
4.84	2015-12-18 08:00:00	97.09
4.91	2015-12-18 08:10:00	96.83
5.16		96.28
5.76	2015-12-18 08:30:00	93.4
6.01	2015-12-18 08:40:00	92.5
6.39	2015-12-18 08:50:00	93.33
6.18	2015-12-18 09:00:00	93.63
5.59	2015-12-18 09:10:00	90.9
6.71	2015-12-18 09:20:00	92.18
6.94	2015-12-18 09:30:00	86.12
6.32	2015-12-18 09:40:00	82.61
6.19	2015-12-18 09:50:00	85.45
6.63	2015-12-18 10:00:00	85.42
6.73	2015-12-18 10:10:00	86.71
6.83	2015-12-18 10:20:00	87.06
6.95	2015-12-18 10:30:00	86.77
7.01	2015-12-18 10:40:00	83.4
6.16	2015-12-18 10:50:00	78.93
6.53	2015-12-18 11:00:00	76.95
6.55	2015-12-18 11:10:00	75.97
6.3	2015-12-18 11:20:00	76.71
6.24	2015-12-18 11:30:00	74.47
6.19	2015-12-18 11:40:00	78.55
7.06	2015-12-18 11:50:00	79.37
6.61	2015-12-18 12:00:00	82.97
7.1	2015-12-18 12:10:00	77.09
7.21	2015-12-18 12:20:00	72.74
7.04	2015-12-18 12:30:00	70.19
6.48	2015-12-18 12:40:00	66.9
5.85	2015-12-18 12:50:00	65.75
6.44	2015-12-18 13:00:00	68.22
6.01	2015-12-18 13:10:00	67.12
6.94	2015-12-18 13:20:00	71.19
6.21	2015-12-18 13:30:00	68.3
6.14	2015-12-18 13:40:00	66.16
5.84	2015-12-18 13:50:00	72.51
5.72	2015-12-18 14:00:00	70.1
6.19	2015-12-18 14:10:00	71.68
6.3	2015-12-18 14:20:00	71.97
5.57	2015-12-18 14:30:00	71.66
5.66	2015-12-18 14:40:00	72.16
5.65	2015-12-18 14:50:00	73.66
5.82		78.88
5.75	2015-12-18 15:10:00	78.24
6	2015-12-18 15:20:00	80.59
6.08	2015-12-18 15:30:00	83.85
5.78	2015-12-18 15:40:00	81.52
5.64	2015-12-18 15:50:00	84.99
5.54	2015-12-18 16:00:00	86.11
5.58	2015-12-18 16:10:00	85.27
5.5	2015-12-18 16:20:00	84.11
5.55	2015-12-18 16:30:00	84.35
5.67	2015-12-18 16:40:00	86.43
5.85	2015-12-18 16:50:00	85.31
6.03	2015-12-18 17:00:00	86.41
6.01	2015-12-18 17:10:00	85.77
5.93	2015-12-18 17:20:00	84.72
5.45	2015-12-18 17:30:00	81.39
4.59	2015-12-18 17:40:00	74.51
5.32	2015-12-18 17:50:00	84.04
5.35	2015-12-18 18:00:00	85.92
5.48	2015-12-18 18:10:00	87.74
5.58		87.01
5.69	2015-12-18 18:30:00	88.79
5.67	2015-12-18 18:40:00	88.06
5.53	2015-12-18 18:50:00	89.67
5.62		88.73
5.55	2015-12-18 19:10:00	88.28
5.07	2015-12-18 19:20:00	87.62
4.93	2015-12-18 19:30:00	85.71
5.17	2015-12-18 19:40:00	87.94
5.28	2015-12-18 19:50:00	91.98
5.63	2015-12-18 20:00:00	90.66
5.58	2015-12-18 20:10:00	91.22
5.13	2015-12-18 20:20:00	89.45
5.05	2015-12-18 20:30:00	88.79
4.93	2015-12-18 20:40:00	91.41
4.91	2015-12-18 20:50:00	92.88
5.22	2015-12-18 21:00:00	92.37
5.18	2015-12-18 21:10:00	92.85
5.21	2015-12-18 21:20:00	92.89
5.32	2015-12-18 21:30:00	92.75
5.17	2015-12-18 21:40:00	92.57
4.85	2015-12-18 21:50:00	88.18
4.94	2015-12-18 22:00:00	90.92
5.11	2015-12-18 22:10:00	90.73
5.18		91.86
5.26	2015-12-18 22:30:00	91.61
5.4	2015-12-18 22:40:00	92.86
5.71	2015-12-18 22:50:00	93.61
5.72	2015-12-18 23:00:00	93.91
5.62	2015-12-18 23:10:00	93.55
5.52	2015-12-18 23:20:00	93.9
5.5	2015-12-18 23:30:00	93
5.52	2015-12-18 23:40:00	90.35
5.5	2015-12-18 23:50:00	94.77
5.44	2015-12-19	94.07
5.38	2015-12-19 00:10:00	93.58
5.43	2015-12-19 00:20:00	93.42
5.46	2015-12-19 00:30:00	94.38
5.4	2015-12-19 00:40:00	94.58
5.36	2015-12-19 00:50:00	94.36
5.28	2015-12-19 01:00:00	94.03
5.08	2015-12-19 01:10:00	94.38
5.07	2015-12-19 01:20:00	95.64
5.13	2015-12-19 01:30:00	93.29
5.32		95.01
5.35	2015-12-19 01:50:00	95.71
5.39	2015-12-19 02:00:00	95.27
5.34	2015-12-19 02:10:00	94.33
5.28		92.68
5.24	2015-12-19 02:30:00	93.05
5.32	2015-12-19 02:40:00	92.92
5.19	2015-12-19 02:50:00	93.08
5.21	2015-12-19 03:00:00	94.09
5.25	2015-12-19 03:10:00	93.43
5.21	2015-12-19 03:20:00	94.66
5.09	2015-12-19 03:30:00	94.24
4.77	2015-12-19 03:40:00	94.87
4.63	2015-12-19 03:50:00	93.12
4.35	2015-12-19 04:00:00	95.58
4.17	2015-12-19 04:10:00	95.2
4.08	2015-12-19 04:20:00	93.79
3.82	2015-12-19 04:30:00	95.84
3.91	2015-12-19 04:40:00	94.89
3.61	2015-12-19 04:50:00	97.03
3.71	2015-12-19 05:00:00	92.75
3.71	2015-12-19 05:10:00	95.53
3.7	2015-12-19 05:20:00	97.13
3.42	2015-12-19 05:30:00	97.89
4.02	2015-12-19 05:40:00	98.74
3.69	2015-12-19 05:50:00	97.7
3.39	2015-12-19 06:00:00	96.33
3.42	2015-12-19 06:10:00	97.03
3.57	2015-12-19 06:20:00	97.58
3.72	2015-12-19 06:30:00	96.69
3.46	2015-12-19 06:40:00	97.83
3.85	2015-12-19 06:50:00	97.31
3.63	2015-12-19 07:00:00	98.21
3.47	2015-12-19 07:10:00	97.48
3.28	2015-12-19 07:20:00	98.02
3.35	2015-12-19 07:30:00	97.42
3.84	2015-12-19 07:40:00	98.36
4.15	2015-12-19 07:50:00	98.06
3.88	2015-12-19 08:00:00	98.49
3.8	2015-12-19 08:10:00	96.82
3.81	2015-12-19 08:20:00	96.36
4.42	2015-12-19 08:30:00	97.26
4.32	2015-12-19 08:40:00	96.31
4.95	2015-12-19 08:50:00	94.44
5.17		90.65
4.26	2015-12-19 09:10:00	89.84
4	2015-12-19 09:20:00	89.06
4.14	2015-12-19 09:30:00	87.1
4.28	2015-12-19 09:40:00	84.71
4.14	2015-12-19 09:50:00	85.12
4.18	2015-12-19 10:00:00	87.31
4.35	2015-12-19 10:10:00	89.22
4.32	2015-12-19 10:20:00	90.18
4.27	2015-12-19 10:30:00	87.64
4.59	2015-12-19 10:40:00	86.07
4.88	2015-12-19 10:50:00	81.84
4.94	2015-12-19 11:00:00	80.48
5.2	2015-12-19 11:10:00	79.82
5.06	2015-12-19 11:20:00	79.6
5.13	2015-12-19 11:30:00	78.86
5.28	2015-12-19 11:40:00	70.98
5.42	2015-12-19 11:50:00	67.26
5.26	2015-12-19 12:00:00	78.03
5.53	2015-12-19 12:10:00	62.45
5.71	2015-12-19 12:20:00	63.48
5.73	2015-12-19 12:30:00	60.87
5.55	2015-12-19 12:40:00	62.3
5.77	2015-12-19 12:50:00	64.42
5.67	2015-12-19 13:00:00	63.73
5.42	2015-12-19 13:10:00	66.5
5.33	2015-12-19 13:20:00	67.66
5.29	2015-12-19 13:30:00	68.85
5.38	2015-12-19 13:40:00	67.22
5.62	2015-12-19 13:50:00	67.33
5.89	2015-12-19 14:00:00	72.55
5.92	2015-12-19 14:10:00	72.27
5.97	2015-12-19 14:20:00	75.54
5.98	2015-12-19 14:30:00	78.79
5.99	2015-12-19 14:40:00	80.07
5.91	2015-12-19 14:50:00	83.16
5.83	2015-12-19 15:00:00	86.53
5.78	2015-12-19 15:10:00	87.48
5.56	2015-12-19 15:20:00	87.27
5.46	2015-12-19 15:30:00	86.69
5.11	2015-12-19 15:40:00	86.77
4.94	2015-12-19 15:50:00	87.24
4.97	2015-12-19 16:00:00	88.59
5.04	2015-12-19 16:10:00	90.67
4.85	2015-12-19 16:20:00	90.7
5.02	2015-12-19 16:30:00	92.84
4.48		92.68
4.47	2015-12-19 16:50:00	91.21
4.41	2015-12-19 17:00:00	92.52
4.6	2015-12-19 17:10:00	93.89
4.85	2015-12-19 17:20:00	97.41
4.71	2015-12-19 17:30:00	97.76
4.23	2015-12-19 17:40:00	98.67
4.1	2015-12-19 17:50:00	99.94
3.89	2015-12-19 18:00:00	98.74
4.15	2015-12-19 18:10:00	96.4
4.15	2015-12-19 18:20:00	95.93
4.14	2015-12-19 18:30:00	97.01
4.15	2015-12-19 18:40:00	98.88
3.68	2015-12-19 18:50:00	100.71
3.25	2015-12-19 19:00:00	100.28
3.07	2015-12-19 19:10:00	101.16
3.08	2015-12-19 19:20:00	101.03
3.36	2015-12-19 19:30:00	98.9
3.59	2015-12-19 19:40:00	98.28
3.51	2015-12-19 19:50:00	98.27
3.31	2015-12-19 20:00:00	99.73
3.14	2015-12-19 20:10:00	99.51
3.31		98.57
3.62	2015-12-19 20:30:00	98.47
3.29	2015-12-19 20:40:00	99.16
2.5	2015-12-19 20:50:00	102.01
2.23	2015-12-19 21:00:00	102.3
2.14	2015-12-19 21:10:00	101.17
2.14	2015-12-19 21:20:00	102.51
2.23	2015-12-19 21:30:00	102.64
2.12		103.59
1.97	2015-12-19 21:50:00	103.16
1.87	2015-12-19 22:00:00	101.4
1.66	2015-12-19 22:10:00	100.04
1.82	2015-12-19 22:20:00	101.82
1.85	2015-12-19 22:30:00	102.13
1.9	2015-12-19 22:40:00	103.5
1.96	2015-12-19 22:50:00	102.16
1.89	2015-12-19 23:00:00	102.77
1.65	2015-12-19 23:10:00	102.2
1.3	2015-12-19 23:20:00	100.56
1.1	2015-12-19 23:30:00	99.11
0.91	2015-12-19 23:40:00	97.74
1.05	2015-12-19 23:50:00	99.66
1	2015-12-20	101.07
0.51	2015-12-20 00:10:00	100.8
0.38	2015-12-20 00:20:00	99.96
0.95	2015-12-20 00:30:00	101.53
1.03	2015-12-20 00:40:00	100.44
1.01	2015-12-20 00:50:00	102.17
0.88		101.46
0.72	2015-12-20 01:10:00	99.62
0.94	2015-12-20 01:20:00	101.59
1.23	2015-12-20 01:30:00	102.42
1.37		101.52
1.61	2015-12-20 01:50:00	101.08
1.64	2015-12-20 02:00:00	102.6
1.68	2015-12-20 02:10:00	102.89
1.57		103.81
1.64	2015-12-20 02:30:00	102.85
1.78	2015-12-20 02:40:00	101.35
2.01	2015-12-20 02:50:00	103.5
1.96	2015-12-20 03:00:00	102.13
1.69	2015-12-20 03:10:00	102.21
1.76	2015-12-20 03:20:00	102.18
1.86	2015-12-20 03:30:00	102.36
1.91		99.98
1.8	2015-12-20 03:50:00	101.35
1.84	2015-12-20 04:00:00	102.82
1.81	2015-12-20 04:10:00	103.1
1.51	2015-12-20 04:20:00	101.86
1.39	2015-12-20 04:30:00	101.47
1.36	2015-12-20 04:40:00	102.15
1.21	2015-12-20 04:50:00	99.95
1.04	2015-12-20 05:00:00	98.96
1.15	2015-12-20 05:10:00	100.46
1.12	2015-12-20 05:20:00	100
1.03	2015-12-20 05:30:00	101.14
0.95	2015-12-20 05:40:00	101.13
1.01	2015-12-20 05:50:00	101.43
1.22	2015-12-20 06:00:00	101.09
1.22	2015-12-20 06:10:00	101.36
1.03		99.57
1.29	2015-12-20 06:30:00	100.24
1.5	2015-12-20 06:40:00	100.4
1.84	2015-12-20 06:50:00	100.94
1.85	2015-12-20 07:00:00	100.27
1.91	2015-12-20 07:10:00	100.29
2.02	2015-12-20 07:20:00	99.26
2	2015-12-20 07:30:00	99.79
2		99.15
2	2015-12-20 07:50:00	100.55
2.03	2015-12-20 08:00:00	101.29
1.96	2015-12-20 08:10:00	100.73
2		100.7
2.08	2015-12-20 08:30:00	101.11
2.3	2015-12-20 08:40:00	99.61
2.56	2015-12-20 08:50:00	99.65
2.75		101
3.4	2015-12-20 09:10:00	98.86
3.34	2015-12-20 09:20:00	99.21
3.29	2015-12-20 09:30:00	98
3.84	2015-12-20 09:40:00	97.17
4	2015-12-20 09:50:00	95.99
4.08	2015-12-20 10:00:00	95.87
4.11	2015-12-20 10:10:00	97.38
4.03	2015-12-20 10:20:00	95.07
3.86	2015-12-20 10:30:00	97.07
4.32	2015-12-20 10:40:00	92.01
4.5	2015-12-20 10:50:00	93.93
4.52	2015-12-20 11:00:00	87.35
4.76	2015-12-20 11:10:00	80.91
4.28	2015-12-20 11:20:00	76.51
4.6	2015-12-20 11:30:00	75.47
4.98		71.08
4.53	2015-12-20 11:50:00	76.04
4.58	2015-12-20 12:00:00	66.15
4.78	2015-12-20 12:10:00	66.76
4.86	2015-12-20 12:20:00	60.89
5.16	2015-12-20 12:30:00	68.78
5.04	2015-12-20 12:40:00	59.55
5.5	2015-12-20 12:50:00	64.34
5.28	2015-12-20 13:00:00	62.29
5.56	2015-12-20 13:10:00	66.21
5.35	2015-12-20 13:20:00	63.24
5.4	2015-12-20 13:30:00	61.82
4.94	2015-12-20 13:40:00	62.54
5.06	2015-12-20 13:50:00	61.42
4.93	2015-12-20 14:00:00	64.04
5	2015-12-20 14:10:00	65.14
5.21		67.24
5.03	2015-12-20 14:30:00	72.44
5.15	2015-12-20 14:40:00	73.67
5.07	2015-12-20 14:50:00	74.45
4.91	2015-12-20 15:00:00	76.31
4.57	2015-12-20 15:10:00	78.49
4.34	2015-12-20 15:20:00	79.4
4.24	2015-12-20 15:30:00	81.81
4.1	2015-12-20 15:40:00	84.59
4.03	2015-12-20 15:50:00	87.4
3.88	2015-12-20 16:00:00	87.64
4.04	2015-12-20 16:10:00	86.2
3.93	2015-12-20 16:20:00	89.23
4.01	2015-12-20 16:30:00	88.94
4.23	2015-12-20 16:40:00	87.4
4.19	2015-12-20 16:50:00	87.89
4.07	2015-12-20 17:00:00	89.41
3.95	2015-12-20 17:10:00	89.87
4.08	2015-12-20 17:20:00	91.07
3.99	2015-12-20 17:30:00	92.74
3.96	2015-12-20 17:40:00	90.68
3.72	2015-12-20 17:50:00	86.54
3.82	2015-12-20 18:00:00	88.15
3.77	2015-12-20 18:10:00	88.93
3.89	2015-12-20 18:20:00	88.46
3.9	2015-12-20 18:30:00	88.33
3.93	2015-12-20 18:40:00	89.17
3.94	2015-12-20 18:50:00	89.73
4.14	2015-12-20 19:00:00	88.47
3.74	2015-12-20 19:10:00	92.65
3.71	2015-12-20 19:20:00	93.4
3.91	2015-12-20 19:30:00	92.78
4.07	2015-12-20 19:40:00	92.39
4.1	2015-12-20 19:50:00	90.75
4.21	2015-12-20 20:00:00	90.24
4.45	2015-12-20 20:10:00	87.53
4.5	2015-12-20 20:20:00	87.25
4.47	2015-12-20 20:30:00	90.15
4.65	2015-12-20 20:40:00	88.41
4.68	2015-12-20 20:50:00	90.81
4.46	2015-12-20 21:00:00	90.14
4.79	2015-12-20 21:10:00	83.76
4.91	2015-12-20 21:20:00	86.7
4.59	2015-12-20 21:30:00	88.82
4.3	2015-12-20 21:40:00	92.43
4.27	2015-12-20 21:50:00	92.38
4.5	2015-12-20 22:00:00	91.78
4.08	2015-12-20 22:10:00	94.19
4.03	2015-12-20 22:20:00	93.25
3.86	2015-12-20 22:30:00	95.5
3.86	2015-12-20 22:40:00	95.14
3.94	2015-12-20 22:50:00	94.17
3.89	2015-12-20 23:00:00	95.39
3.64	2015-12-20 23:10:00	96.62
4.12	2015-12-20 23:20:00	97.55
4.04	2015-12-20 23:30:00	98.75
4.12	2015-12-20 23:40:00	96.89
4.26	2015-12-20 23:50:00	97.62

## Sheet: Met station
Outside temperature [degree C]	Date and time		Date and time	Wind direction [degree]	Wind speed [m s-1]
1.27778	2015-12-13		2015-12-13	270	0.44704
1.27778	2015-12-13 00:01:00		2015-12-13 00:01:00	247.5	0.44704
1.27778	2015-12-13 00:02:00		2015-12-13 00:02:00	247.5	0.44704
1.27778	2015-12-13 00:03:00		2015-12-13 00:03:00	247.5	0.44704
1.27778	2015-12-13 00:04:00		2015-12-13 00:04:00	247.5	0.44704
1.27778	2015-12-13 00:05:00		2015-12-13 00:05:00	270	0.44704
1.27778	2015-12-13 00:06:00		2015-12-13 00:06:00	270	0.44704
1.27778	2015-12-13 00:07:00		2015-12-13 00:07:00	270	0.44704
1.27778	2015-12-13 00:08:00		2015-12-13 00:08:00	270	0.44704
1.27778	2015-12-13 00:09:00		2015-12-13 00:09:00	270	0.44704
1.33333	2015-12-13 00:10:00		2015-12-13 00:10:00	270	0.44704
1.38889	2015-12-13 00:11:00		2015-12-13 00:11:00	270	0.44704
1.38889	2015-12-13 00:12:00		2015-12-13 00:12:00	270	0.44704
1.38889	2015-12-13 00:13:00		2015-12-13 00:13:00	270	0.44704
1.38889	2015-12-13 00:14:00		2015-12-13 00:14:00	270	0.44704
1.44444	2015-12-13 00:15:00		2015-12-13 00:15:00	270	0.44704
1.44444	2015-12-13 00:16:00		2015-12-13 00:16:00	270	0.44704
1.44444	2015-12-13 00:17:00		2015-12-13 00:17:00	270	0.44704
1.44444	2015-12-13 00:18:00		2015-12-13 00:18:00	270	0
1.44444	2015-12-13 00:19:00		2015-12-13 00:19:00	270	0
1.44444	2015-12-13 00:20:00		2015-12-13 00:20:00	270	0.44704
1.44444	2015-12-13 00:21:00		2015-12-13 00:21:00	270	0
1.44444	2015-12-13 00:22:00		2015-12-13 00:22:00	292.5	0
1.44444	2015-12-13 00:23:00		2015-12-13 00:23:00	292.5	0.44704
1.38889	2015-12-13 00:24:00		2015-12-13 00:24:00	292.5	0.44704
1.38889	2015-12-13 00:25:00		2015-12-13 00:25:00	292.5	0.44704
1.38889	2015-12-13 00:26:00		2015-12-13 00:26:00	292.5	0
1.38889	2015-12-13 00:27:00		2015-12-13 00:27:00	292.5	0
1.33333	2015-12-13 00:28:00		2015-12-13 00:28:00	292.5	0
1.33333	2015-12-13 00:29:00		2015-12-13 00:29:00	270	0.44704
1.33333	2015-12-13 00:30:00		2015-12-13 00:30:00	292.5	0
1.27778	2015-12-13 00:31:00		2015-12-13 00:31:00	292.5	0
1.27778	2015-12-13 00:32:00		2015-12-13 00:32:00	292.5	0
1.27778	2015-12-13 00:33:00		2015-12-13 00:33:00	292.5	0
1.27778	2015-12-13 00:34:00		2015-12-13 00:34:00	292.5	0
1.22222	2015-12-13 00:35:00		2015-12-13 00:35:00	315	0.44704
1.22222	2015-12-13 00:36:00		2015-12-13 00:36:00	315	0.44704
1.22222	2015-12-13 00:37:00		2015-12-13 00:37:00	315	0
1.22222	2015-12-13 00:38:00		2015-12-13 00:38:00	292.5	0.44704
1.16667	2015-12-13 00:39:00		2015-12-13 00:39:00	292.5	0.44704
1.16667	2015-12-13 00:40:00		2015-12-13 00:40:00	315	0
1.16667	2015-12-13 00:41:00		2015-12-13 00:41:00	315	0.44704
1.16667	2015-12-13 00:42:00		2015-12-13 00:42:00	315	0.44704
1.16667	2015-12-13 00:43:00		2015-12-13 00:43:00	315	0.44704
1.16667	2015-12-13 00:44:00		2015-12-13 00:44:00	315	0
1.22222	2015-12-13 00:45:00		2015-12-13 00:45:00	315	0.44704
1.22222	2015-12-13 00:46:00		2015-12-13 00:46:00	315	0
1.22222	2015-12-13 00:47:00		2015-12-13 00:47:00	315	0
1.22222	2015-12-13 00:48:00		2015-12-13 00:48:00		0
1.22222	2015-12-13 00:49:00		2015-12-13 00:49:00	315	0
1.22222	2015-12-13 00:50:00		2015-12-13 00:50:00		0
1.22222	2015-12-13 00:51:00		2015-12-13 00:51:00	315	0
1.22222	2015-12-13 00:52:00		2015-12-13 00:52:00	315	0
1.22222	2015-12-13 00:53:00		2015-12-13 00:53:00		0
1.16667	2015-12-13 00:54:00		2015-12-13 00:54:00		0
1.16667	2015-12-13 00:55:00		2015-12-13 00:55:00	315	0
1.16667	2015-12-13 00:56:00		2015-12-13 00:56:00		0
1.16667	2015-12-13 00:57:00		2015-12-13 00:57:00	292.5	0
1.11111	2015-12-13 00:58:00		2015-12-13 00:58:00	292.5	0
1.11111	2015-12-13 00:59:00		2015-12-13 00:59:00		0
1.05556	2015-12-13 01:00:00		2015-12-13 01:00:00	292.5	0
1.05556	2015-12-13 01:01:00		2015-12-13 01:01:00	270	0
1	2015-12-13 01:02:00		2015-12-13 01:02:00		0
1	2015-12-13 01:03:00		2015-12-13 01:03:00	270	0
0.944444	2015-12-13 01:04:00		2015-12-13 01:04:00	247.5	0.44704
0.944444	2015-12-13 01:05:00		2015-12-13 01:05:00	225	0
0.888889	2015-12-13 01:06:00		2015-12-13 01:06:00		0
0.888889	2015-12-13 01:07:00		2015-12-13 01:07:00	202.5	0
0.833333	2015-12-13 01:08:00		2015-12-13 01:08:00		0
0.833333	2015-12-13 01:09:00		2015-12-13 01:09:00		0
0.833333	2015-12-13 01:10:00		2015-12-13 01:10:00	202.5	0
0.833333	2015-12-13 01:11:00		2015-12-13 01:11:00	202.5	0
0.777778	2015-12-13 01:12:00		2015-12-13 01:12:00	202.5	0
0.777778	2015-12-13 01:13:00		2015-12-13 01:13:00	180	0
0.777778	2015-12-13 01:14:00		2015-12-13 01:14:00	180	0
0.777778	2015-12-13 01:15:00		2015-12-13 01:15:00	180	0.44704
0.777778	2015-12-13 01:16:00		2015-12-13 01:16:00	180	0.44704
0.777778	2015-12-13 01:17:00		2015-12-13 01:17:00	180	0
0.722222	2015-12-13 01:18:00		2015-12-13 01:18:00	180	0.44704
0.722222	2015-12-13 01:19:00		2015-12-13 01:19:00	180	0
0.666667	2015-12-13 01:20:00		2015-12-13 01:20:00	180	0
0.666667	2015-12-13 01:21:00		2015-12-13 01:21:00		0
0.611111	2015-12-13 01:22:00		2015-12-13 01:22:00	202.5	0
0.611111	2015-12-13 01:23:00		2015-12-13 01:23:00		0
0.611111	2015-12-13 01:24:00		2015-12-13 01:24:00		0
0.611111	2015-12-13 01:25:00		2015-12-13 01:25:00		0
0.611111	2015-12-13 01:26:00		2015-12-13 01:26:00		0
0.555556	2015-12-13 01:27:00		2015-12-13 01:27:00	202.5	0
0.555556	2015-12-13 01:28:00		2015-12-13 01:28:00		0
0.555556	2015-12-13 01:29:00		2015-12-13 01:29:00	225	0
0.555556	2015-12-13 01:30:00		2015-12-13 01:30:00	247.5	0
0.5	2015-12-13 01:31:00		2015-12-13 01:31:00	247.5	0.44704
0.5	2015-12-13 01:32:00		2015-12-13 01:32:00	225	0.44704
0.444444	2015-12-13 01:33:00		2015-12-13 01:33:00	225	0.44704
0.444444	2015-12-13 01:34:00		2015-12-13 01:34:00	247.5	0
0.444444	2015-12-13 01:35:00		2015-12-13 01:35:00	247.5	0
0.444444	2015-12-13 01:36:00		2015-12-13 01:36:00	247.5	0
0.444444	2015-12-13 01:37:00		2015-12-13 01:37:00	247.5	0
0.444444	2015-12-13 01:38:00		2015-12-13 01:38:00	270	0
0.444444	2015-12-13 01:39:00		2015-12-13 01:39:00	270	0
0.444444	2015-12-13 01:40:00		2015-12-13 01:40:00	270	0
0.444444	2015-12-13 01:41:00		2015-12-13 01:41:00	292.5	0
0.444444	2015-12-13 01:42:00		2015-12-13 01:42:00	315	0.44704
0.444444	2015-12-13 01:43:00		2015-12-13 01:43:00	315	0.44704
0.5	2015-12-13 01:44:00		2015-12-13 01:44:00	315	0
0.5	2015-12-13 01:45:00		2015-12-13 01:45:00	315	0
0.5	2015-12-13 01:46:00		2015-12-13 01:46:00	315	0
0.5	2015-12-13 01:47:00		2015-12-13 01:47:00	292.5	0
0.444444	2015-12-13 01:48:00		2015-12-13 01:48:00	292.5	0
0.444444	2015-12-13 01:49:00		2015-12-13 01:49:00		0
0.444444	2015-12-13 01:50:00		2015-12-13 01:50:00		0
0.444444	2015-12-13 01:51:00		2015-12-13 01:51:00	292.5	0
0.388889	2015-12-13 01:52:00		2015-12-13 01:52:00	315	0
0.444444	2015-12-13 01:53:00		2015-12-13 01:53:00	315	0.44704
0.444444	2015-12-13 01:54:00		2015-12-13 01:54:00	337.5	0.44704
0.444444	2015-12-13 01:55:00		2015-12-13 01:55:00	315	0
0.444444	2015-12-13 01:56:00		2015-12-13 01:56:00	315	0
0.444444	2015-12-13 01:57:00		2015-12-13 01:57:00	292.5	0
0.388889	2015-12-13 01:58:00		2015-12-13 01:58:00		0
0.444444	2015-12-13 01:59:00		2015-12-13 01:59:00	315	0
0.444444	2015-12-13 02:00:00		2015-12-13 02:00:00	337.5	0.44704
0.444444	2015-12-13 02:01:00		2015-12-13 02:01:00	337.5	0.44704
0.444444	2015-12-13 02:02:00		2015-12-13 02:02:00	337.5	0.44704
0.5	2015-12-13 02:03:00		2015-12-13 02:03:00	337.5	0
0.5	2015-12-13 02:04:00		2015-12-13 02:04:00		0
0.5	2015-12-13 02:05:00		2015-12-13 02:05:00	337.5	0
0.5	2015-12-13 02:06:00		2015-12-13 02:06:00	270	0
0.5	2015-12-13 02:07:00		2015-12-13 02:07:00	247.5	0
0.444444	2015-12-13 02:08:00		2015-12-13 02:08:00		0
0.444444	2015-12-13 02:09:00		2015-12-13 02:09:00	225	0.44704
0.444444	2015-12-13 02:10:00		2015-12-13 02:10:00	157.5	0.44704
0.444444	2015-12-13 02:11:00		2015-12-13 02:11:00	157.5	0
0.444444	2015-12-13 02:12:00		2015-12-13 02:12:00	157.5	0
0.444444	2015-12-13 02:13:00		2015-12-13 02:13:00	157.5	0
0.388889	2015-12-13 02:14:00		2015-12-13 02:14:00		0
0.388889	2015-12-13 02:15:00		2015-12-13 02:15:00		0
0.388889	2015-12-13 02:16:00		2015-12-13 02:16:00		0
0.388889	2015-12-13 02:17:00		2015-12-13 02:17:00		0
0.388889	2015-12-13 02:18:00		2015-12-13 02:18:00	157.5	0
0.333333	2015-12-13 02:19:00		2015-12-13 02:19:00	135	0
0.333333	2015-12-13 02:20:00		2015-12-13 02:20:00	157.5	0
0.333333	2015-12-13 02:21:00		2015-12-13 02:21:00	202.5	0
0.333333	2015-12-13 02:22:00		2015-12-13 02:22:00	225	0
0.277778	2015-12-13 02:23:00		2015-12-13 02:23:00	180	0.44704
0.277778	2015-12-13 02:24:00		2015-12-13 02:24:00	180	0
0.277778	2015-12-13 02:25:00		2015-12-13 02:25:00		0
0.277778	2015-12-13 02:26:00		2015-12-13 02:26:00	202.5	0
0.277778	2015-12-13 02:27:00		2015-12-13 02:27:00	202.5	0
0.222222	2015-12-13 02:28:00		2015-12-13 02:28:00	180	0
0.222222	2015-12-13 02:29:00		2015-12-13 02:29:00	180	0
0.222222	2015-12-13 02:30:00		2015-12-13 02:30:00	157.5	0.44704
0.222222	2015-12-13 02:31:00		2015-12-13 02:31:00	180	0.44704
0.222222	2015-12-13 02:32:00		2015-12-13 02:32:00	180	0.44704
0.222222	2015-12-13 02:33:00		2015-12-13 02:33:00	180	0
0.222222	2015-12-13 02:34:00		2015-12-13 02:34:00	202.5	0
0.166667	2015-12-13 02:35:00		2015-12-13 02:35:00	180	0.44704
0.166667	2015-12-13 02:36:00		2015-12-13 02:36:00	180	0
0.222222	2015-12-13 02:37:00		2015-12-13 02:37:00	180	0.44704
0.222222	2015-12-13 02:38:00		2015-12-13 02:38:00	202.5	0.44704
0.222222	2015-12-13 02:39:00		2015-12-13 02:39:00	202.5	0.44704
0.277778	2015-12-13 02:40:00		2015-12-13 02:40:00	157.5	0.44704
0.277778	2015-12-13 02:41:00		2015-12-13 02:41:00	157.5	0
0.277778	2015-12-13 02:42:00		2015-12-13 02:42:00	157.5	0
0.277778	2015-12-13 02:43:00		2015-12-13 02:43:00	157.5	0
0.277778	2015-12-13 02:44:00		2015-12-13 02:44:00	157.5	0
0.277778	2015-12-13 02:45:00		2015-12-13 02:45:00	157.5	0
0.277778	2015-12-13 02:46:00		2015-12-13 02:46:00	157.5	0.44704
0.277778	2015-12-13 02:47:00		2015-12-13 02:47:00	157.5	0
0.277778	2015-12-13 02:48:00		2015-12-13 02:48:00	112.5	0
0.277778	2015-12-13 02:49:00		2015-12-13 02:49:00	112.5	0
0.277778	2015-12-13 02:50:00		2015-12-13 02:50:00		0
0.277778	2015-12-13 02:51:00		2015-12-13 02:51:00	135	0.44704
0.277778	2015-12-13 02:52:00		2015-12-13 02:52:00	202.5	0.44704
0.222222	2015-12-13 02:53:00		2015-12-13 02:53:00	225	0.44704
0.222222	2015-12-13 02:54:00		2015-12-13 02:54:00	225	0
0.277778	2015-12-13 02:55:00		2015-12-13 02:55:00	225	0.44704
0.277778	2015-12-13 02:56:00		2015-12-13 02:56:00	225	0.44704
0.333333	2015-12-13 02:57:00		2015-12-13 02:57:00	225	0.44704
0.333333	2015-12-13 02:58:00		2015-12-13 02:58:00	225	0.44704
0.333333	2015-12-13 02:59:00		2015-12-13 02:59:00	247.5	0.44704
0.333333	2015-12-13 03:00:00		2015-12-13 03:00:00	247.5	0.44704
0.333333	2015-12-13 03:01:00		2015-12-13 03:01:00	225	0.44704
0.444444	2015-12-13 03:02:00		2015-12-13 03:02:00	225	0.44704
0.444444	2015-12-13 03:03:00		2015-12-13 03:03:00	247.5	0
0.444444	2015-12-13 03:04:00		2015-12-13 03:04:00	247.5	0
0.444444	2015-12-13 03:05:00		2015-12-13 03:05:00	247.5	0
0.444444	2015-12-13 03:06:00		2015-12-13 03:06:00		0
0.444444	2015-12-13 03:07:00		2015-12-13 03:07:00	270	0
0.388889	2015-12-13 03:08:00		2015-12-13 03:08:00	247.5	0
0.388889	2015-12-13 03:09:00		2015-12-13 03:09:00	247.5	0
0.333333	2015-12-13 03:10:00		2015-12-13 03:10:00	247.5	0.44704
0.333333	2015-12-13 03:11:00		2015-12-13 03:11:00	247.5	0.44704
0.277778	2015-12-13 03:12:00		2015-12-13 03:12:00	247.5	0.44704
0.277778	2015-12-13 03:13:00		2015-12-13 03:13:00	225	0.44704
0.277778	2015-12-13 03:14:00		2015-12-13 03:14:00	247.5	0.44704
0.277778	2015-12-13 03:15:00		2015-12-13 03:15:00	247.5	0.44704
0.277778	2015-12-13 03:16:00		2015-12-13 03:16:00	225	0.89408
0.333333	2015-12-13 03:17:00		2015-12-13 03:17:00	225	0.44704
0.333333	2015-12-13 03:18:00		2015-12-13 03:18:00	225	0.44704
0.333333	2015-12-13 03:19:00		2015-12-13 03:19:00	247.5	0.44704
0.388889	2015-12-13 03:20:00		2015-12-13 03:20:00	225	0.44704
0.444444	2015-12-13 03:21:00		2015-12-13 03:21:00	225	0.44704
0.444444	2015-12-13 03:22:00		2015-12-13 03:22:00	247.5	0.44704
0.444444	2015-12-13 03:23:00		2015-12-13 03:23:00	247.5	0.44704
0.388889	2015-12-13 03:24:00		2015-12-13 03:24:00	247.5	0.44704
0.388889	2015-12-13 03:25:00		2015-12-13 03:25:00	247.5	0.44704
0.388889	2015-12-13 03:26:00		2015-12-13 03:26:00	225	0.44704
0.388889	2015-12-13 03:27:00		2015-12-13 03:27:00	225	0.44704
0.333333	2015-12-13 03:28:00		2015-12-13 03:28:00	247.5	0.44704
0.333333	2015-12-13 03:29:00		2015-12-13 03:29:00	247.5	0.44704
0.333333	2015-12-13 03:30:00		2015-12-13 03:30:00	247.5	0.89408
0.333333	2015-12-13 03:31:00		2015-12-13 03:31:00	225	0.89408
0.333333	2015-12-13 03:32:00		2015-12-13 03:32:00	225	0.89408
0.333333	2015-12-13 03:33:00		2015-12-13 03:33:00	247.5	0
0.333333	2015-12-13 03:34:00		2015-12-13 03:34:00		0
0.333333	2015-12-13 03:35:00		2015-12-13 03:35:00	247.5	0.44704
0.388889	2015-12-13 03:36:00		2015-12-13 03:36:00	247.5	0.44704
0.333333	2015-12-13 03:37:00		2015-12-13 03:37:00	247.5	0.44704
0.333333	2015-12-13 03:38:00		2015-12-13 03:38:00	247.5	0.44704
0.388889	2015-12-13 03:39:00		2015-12-13 03:39:00	247.5	0.44704
0.388889	2015-12-13 03:40:00		2015-12-13 03:40:00	247.5	0.89408
0.444444	2015-12-13 03:41:00		2015-12-13 03:41:00	247.5	0.44704
0.444444	2015-12-13 03:42:00		2015-12-13 03:42:00	247.5	0.44704
0.388889	2015-12-13 03:43:00		2015-12-13 03:43:00	247.5	0.44704
0.388889	2015-12-13 03:44:00		2015-12-13 03:44:00	247.5	0.44704
0.333333	2015-12-13 03:45:00		2015-12-13 03:45:00	247.5	0.44704
0.388889	2015-12-13 03:46:00		2015-12-13 03:46:00	247.5	0.44704
0.388889	2015-12-13 03:47:00		2015-12-13 03:47:00	247.5	0.44704
0.444444	2015-12-13 03:48:00		2015-12-13 03:48:00	247.5	0.44704
0.444444	2015-12-13 03:49:00		2015-12-13 03:49:00	247.5	0.44704
0.444444	2015-12-13 03:50:00		2015-12-13 03:50:00	247.5	0.44704
0.444444	2015-12-13 03:51:00		2015-12-13 03:51:00	247.5	0.44704
0.5	2015-12-13 03:52:00		2015-12-13 03:52:00	247.5	0.44704
0.444444	2015-12-13 03:53:00		2015-12-13 03:53:00	270	0.44704
0.5	2015-12-13 03:54:00		2015-12-13 03:54:00	270	0.44704
0.444444	2015-12-13 03:55:00		2015-12-13 03:55:00	270	0.44704
0.444444	2015-12-13 03:56:00		2015-12-13 03:56:00	270	0.44704
0.5	2015-12-13 03:57:00		2015-12-13 03:57:00	270	0.44704
0.5	2015-12-13 03:58:00		2015-12-13 03:58:00	270	0.44704
0.444444	2015-12-13 03:59:00		2015-12-13 03:59:00	247.5	0.44704
0.444444	2015-12-13 04:00:00		2015-12-13 04:00:00	247.5	0.89408
0.444444	2015-12-13 04:01:00		2015-12-13 04:01:00	225	0.89408
0.444444	2015-12-13 04:02:00		2015-12-13 04:02:00	247.5	0.44704
0.444444	2015-12-13 04:03:00		2015-12-13 04:03:00	270	0.44704
0.444444	2015-12-13 04:04:00		2015-12-13 04:04:00	270	0.44704
0.444444	2015-12-13 04:05:00		2015-12-13 04:05:00	270	0.44704
0.444444	2015-12-13 04:06:00		2015-12-13 04:06:00	270	0.44704
0.444444	2015-12-13 04:07:00		2015-12-13 04:07:00	247.5	0.89408
0.5	2015-12-13 04:08:00		2015-12-13 04:08:00	247.5	0.89408
0.5	2015-12-13 04:09:00		2015-12-13 04:09:00	247.5	0.44704
0.5	2015-12-13 04:10:00		2015-12-13 04:10:00	270	0.44704
0.5	2015-12-13 04:11:00		2015-12-13 04:11:00	270	0.44704
0.5	2015-12-13 04:12:00		2015-12-13 04:12:00	270	0.44704
0.555556	2015-12-13 04:13:00		2015-12-13 04:13:00	270	0
0.555556	2015-12-13 04:14:00		2015-12-13 04:14:00	270	0.44704
0.555556	2015-12-13 04:15:00		2015-12-13 04:15:00	292.5	0.44704
0.555556	2015-12-13 04:16:00		2015-12-13 04:16:00	270	0.44704
0.555556	2015-12-13 04:17:00		2015-12-13 04:17:00	270	0.44704
0.611111	2015-12-13 04:18:00		2015-12-13 04:18:00	270	0.44704
0.611111	2015-12-13 04:19:00		2015-12-13 04:19:00	270	0.44704
0.611111	2015-12-13 04:20:00		2015-12-13 04:20:00	270	0.44704
0.611111	2015-12-13 04:21:00		2015-12-13 04:21:00	270	0.44704
0.611111	2015-12-13 04:22:00		2015-12-13 04:22:00	270	0.44704
0.611111	2015-12-13 04:23:00		2015-12-13 04:23:00	270	0.44704
0.611111	2015-12-13 04:24:00		2015-12-13 04:24:00	270	0.44704
0.611111	2015-12-13 04:25:00		2015-12-13 04:25:00	270	0.44704
0.666667	2015-12-13 04:26:00		2015-12-13 04:26:00	270	0.44704
0.666667	2015-12-13 04:27:00		2015-12-13 04:27:00	270	0.44704
0.666667	2015-12-13 04:28:00		2015-12-13 04:28:00	270	0.44704
0.666667	2015-12-13 04:29:00		2015-12-13 04:29:00	270	0.44704
0.666667	2015-12-13 04:30:00		2015-12-13 04:30:00	270	0.89408
0.722222	2015-12-13 04:31:00		2015-12-13 04:31:00	247.5	0.89408
0.722222	2015-12-13 04:32:00		2015-12-13 04:32:00	247.5	0.89408
0.777778	2015-12-13 04:33:00		2015-12-13 04:33:00	247.5	0.44704
0.777778	2015-12-13 04:34:00		2015-12-13 04:34:00	270	0.44704
0.777778	2015-12-13 04:35:00		2015-12-13 04:35:00	270	0.89408
0.777778	2015-12-13 04:36:00		2015-12-13 04:36:00	247.5	0.89408
0.833333	2015-12-13 04:37:00		2015-12-13 04:37:00	247.5	0.44704
0.833333	2015-12-13 04:38:00		2015-12-13 04:38:00	270	0.44704
0.888889	2015-12-13 04:39:00		2015-12-13 04:39:00	270	0.89408
0.944444	2015-12-13 04:40:00		2015-12-13 04:40:00	247.5	0.44704
1	2015-12-13 04:41:00		2015-12-13 04:41:00	247.5	0.44704
1	2015-12-13 04:42:00		2015-12-13 04:42:00	247.5	0
1.05556	2015-12-13 04:43:00		2015-12-13 04:43:00	270	0.44704
1.05556	2015-12-13 04:44:00		2015-12-13 04:44:00	270	0.44704
1.11111	2015-12-13 04:45:00		2015-12-13 04:45:00	270	0
1.11111	2015-12-13 04:46:00		2015-12-13 04:46:00		0
1.11111	2015-12-13 04:47:00		2015-12-13 04:47:00	270	0
1.11111	2015-12-13 04:48:00		2015-12-13 04:48:00		0
1.11111	2015-12-13 04:49:00		2015-12-13 04:49:00	270	0
1.11111	2015-12-13 04:50:00		2015-12-13 04:50:00	270	0
1.11111	2015-12-13 04:51:00		2015-12-13 04:51:00	292.5	0.44704
1.11111	2015-12-13 04:52:00		2015-12-13 04:52:00	315	0.44704
1.11111	2015-12-13 04:53:00		2015-12-13 04:53:00	315	0
1.11111	2015-12-13 04:54:00		2015-12-13 04:54:00		0
1.11111	2015-12-13 04:55:00		2015-12-13 04:55:00		0
1.05556	2015-12-13 04:56:00		2015-12-13 04:56:00	315	0
1.11111	2015-12-13 04:57:00		2015-12-13 04:57:00	315	0
1.05556	2015-12-13 04:58:00		2015-12-13 04:58:00		0
1.05556	2015-12-13 04:59:00		2015-12-13 04:59:00		0
1.05556	2015-12-13 05:00:00		2015-12-13 05:00:00	292.5	0
1	2015-12-13 05:01:00		2015-12-13 05:01:00	202.5	0.44704
0.944444	2015-12-13 05:02:00		2015-12-13 05:02:00	180	0
0.888889	2015-12-13 05:03:00		2015-12-13 05:03:00	180	0.44704
0.833333	2015-12-13 05:04:00		2015-12-13 05:04:00	180	0.44704
0.777778	2015-12-13 05:05:00		2015-12-13 05:05:00	180	0
0.777778	2015-12-13 05:06:00		2015-12-13 05:06:00	202.5	0
0.722222	2015-12-13 05:07:00		2015-12-13 05:07:00	202.5	0
0.722222	2015-12-13 05:08:00		2015-12-13 05:08:00	225	0
0.666667	2015-12-13 05:09:00		2015-12-13 05:09:00	247.5	0.44704
0.611111	2015-12-13 05:10:00		2015-12-13 05:10:00	247.5	0.44704
0.611111	2015-12-13 05:11:00		2015-12-13 05:11:00	247.5	0.44704
0.611111	2015-12-13 05:12:00		2015-12-13 05:12:00	247.5	0.44704
0.666667	2015-12-13 05:13:00		2015-12-13 05:13:00	247.5	0.44704
0.722222	2015-12-13 05:14:00		2015-12-13 05:14:00	270	0.44704
0.777778	2015-12-13 05:15:00		2015-12-13 05:15:00	270	0.44704
0.833333	2015-12-13 05:16:00		2015-12-13 05:16:00	270	0.44704
0.888889	2015-12-13 05:17:00		2015-12-13 05:17:00	270	0
0.944444	2015-12-13 05:18:00		2015-12-13 05:18:00	270	0
1	2015-12-13 05:19:00		2015-12-13 05:19:00	270	0
1	2015-12-13 05:20:00		2015-12-13 05:20:00	270	0.44704
1.05556	2015-12-13 05:21:00		2015-12-13 05:21:00	270	0
1.11111	2015-12-13 05:22:00		2015-12-13 05:22:00		0
1.11111	2015-12-13 05:23:00		2015-12-13 05:23:00	270	0.44704
1.16667	2015-12-13 05:24:00		2015-12-13 05:24:00	270	0.44704
1.22222	2015-12-13 05:25:00		2015-12-13 05:25:00	270	0
1.22222	2015-12-13 05:26:00		2015-12-13 05:26:00		0
1.27778	2015-12-13 05:27:00		2015-12-13 05:27:00	270	0
1.27778	2015-12-13 05:28:00		2015-12-13 05:28:00	270	0.44704
1.27778	2015-12-13 05:29:00		2015-12-13 05:29:00	292.5	0
1.27778	2015-12-13 05:30:00		2015-12-13 05:30:00	315	0.44704
1.33333	2015-12-13 05:31:00		2015-12-13 05:31:00	337.5	0.44704
1.33333	2015-12-13 05:32:00		2015-12-13 05:32:00	337.5	0.44704
1.33333	2015-12-13 05:33:00		2015-12-13 05:33:00	315	0
1.33333	2015-12-13 05:34:00		2015-12-13 05:34:00	315	0
1.38889	2015-12-13 05:35:00		2015-12-13 05:35:00	315	0.44704
1.38889	2015-12-13 05:36:00		2015-12-13 05:36:00	315	0.44704
1.38889	2015-12-13 05:37:00		2015-12-13 05:37:00	315	0
1.44444	2015-12-13 05:38:00		2015-12-13 05:38:00	315	0.44704
1.44444	2015-12-13 05:39:00		2015-12-13 05:39:00	315	0.44704
1.44444	2015-12-13 05:40:00		2015-12-13 05:40:00	315	0
1.44444	2015-12-13 05:41:00		2015-12-13 05:41:00		0
1.44444	2015-12-13 05:42:00		2015-12-13 05:42:00	315	0
1.44444	2015-12-13 05:43:00		2015-12-13 05:43:00		0
1.5	2015-12-13 05:44:00		2015-12-13 05:44:00	315	0.44704
1.5	2015-12-13 05:45:00		2015-12-13 05:45:00	315	0.44704
1.5	2015-12-13 05:46:00		2015-12-13 05:46:00	315	0.44704
1.5	2015-12-13 05:47:00		2015-12-13 05:47:00	337.5	0.44704
1.5	2015-12-13 05:48:00		2015-12-13 05:48:00		0
1.5	2015-12-13 05:49:00		2015-12-13 05:49:00	337.5	0
1.5	2015-12-13 05:50:00		2015-12-13 05:50:00	315	0
1.5	2015-12-13 05:51:00		2015-12-13 05:51:00		0
1.55556	2015-12-13 05:52:00		2015-12-13 05:52:00	315	0
1.55556	2015-12-13 05:53:00		2015-12-13 05:53:00	337.5	0.44704
1.55556	2015-12-13 05:54:00		2015-12-13 05:54:00	337.5	0.44704
1.55556	2015-12-13 05:55:00		2015-12-13 05:55:00	337.5	0
1.55556	2015-12-13 05:56:00		2015-12-13 05:56:00		0
1.55556	2015-12-13 05:57:00		2015-12-13 05:57:00	337.5	0
1.61111	2015-12-13 05:58:00		2015-12-13 05:58:00	337.5	0
1.61111	2015-12-13 05:59:00		2015-12-13 05:59:00	337.5	0
1.61111	2015-12-13 06:00:00		2015-12-13 06:00:00	337.5	0
1.61111	2015-12-13 06:01:00		2015-12-13 06:01:00	337.5	0.44704
1.61111	2015-12-13 06:02:00		2015-12-13 06:02:00	0	0.44704
1.61111	2015-12-13 06:03:00		2015-12-13 06:03:00	22.5	0.44704
1.61111	2015-12-13 06:04:00		2015-12-13 06:04:00	112.5	0
1.55556	2015-12-13 06:05:00		2015-12-13 06:05:00	135	0.44704
1.55556	2015-12-13 06:06:00		2015-12-13 06:06:00	135	0.44704
1.5	2015-12-13 06:07:00		2015-12-13 06:07:00	112.5	0.44704
1.44444	2015-12-13 06:08:00		2015-12-13 06:08:00	135	0.44704
1.38889	2015-12-13 06:09:00		2015-12-13 06:09:00	135	0
1.33333	2015-12-13 06:10:00		2015-12-13 06:10:00	135	0
1.27778	2015-12-13 06:11:00		2015-12-13 06:11:00	135	0.44704
1.22222	2015-12-13 06:12:00		2015-12-13 06:12:00	135	0.44704
1.22222	2015-12-13 06:13:00		2015-12-13 06:13:00	135	0.44704
1.16667	2015-12-13 06:14:00		2015-12-13 06:14:00	135	0.44704
1.16667	2015-12-13 06:15:00		2015-12-13 06:15:00	135	0.44704
1.11111	2015-12-13 06:16:00		2015-12-13 06:16:00	135	0.44704
1.11111	2015-12-13 06:17:00		2015-12-13 06:17:00	135	0.44704
1.05556	2015-12-13 06:18:00		2015-12-13 06:18:00	157.5	0
1.05556	2015-12-13 06:19:00		2015-12-13 06:19:00	180	0
1.05556	2015-12-13 06:20:00		2015-12-13 06:20:00	202.5	0
1.05556	2015-12-13 06:21:00		2015-12-13 06:21:00	202.5	0
1	2015-12-13 06:22:00		2015-12-13 06:22:00	202.5	0
1	2015-12-13 06:23:00		2015-12-13 06:23:00		0
1	2015-12-13 06:24:00		2015-12-13 06:24:00		0
1	2015-12-13 06:25:00		2015-12-13 06:25:00		0
1	2015-12-13 06:26:00		2015-12-13 06:26:00	225	0
1	2015-12-13 06:27:00		2015-12-13 06:27:00	225	0
1.05556	2015-12-13 06:28:00		2015-12-13 06:28:00	225	0
1.05556	2015-12-13 06:29:00		2015-12-13 06:29:00	202.5	0
1.05556	2015-12-13 06:30:00		2015-12-13 06:30:00	202.5	0
1.05556	2015-12-13 06:31:00		2015-12-13 06:31:00		0
1.05556	2015-12-13 06:32:00		2015-12-13 06:32:00		0
1.11111	2015-12-13 06:33:00		2015-12-13 06:33:00		0
1.11111	2015-12-13 06:34:00		2015-12-13 06:34:00		0
1.11111	2015-12-13 06:35:00		2015-12-13 06:35:00		0
1.11111	2015-12-13 06:36:00		2015-12-13 06:36:00		0
1.16667	2015-12-13 06:37:00		2015-12-13 06:37:00		0
1.16667	2015-12-13 06:38:00		2015-12-13 06:38:00	247.5	0
1.16667	2015-12-13 06:39:00		2015-12-13 06:39:00	247.5	0.44704
1.16667	2015-12-13 06:40:00		2015-12-13 06:40:00	247.5	0.44704
1.22222	2015-12-13 06:41:00		2015-12-13 06:41:00	270	0.44704
1.27778	2015-12-13 06:42:00		2015-12-13 06:42:00	270	0.44704
1.27778	2015-12-13 06:43:00		2015-12-13 06:43:00	270	0.44704
1.27778	2015-12-13 06:44:00		2015-12-13 06:44:00	270	0.44704
1.33333	2015-12-13 06:45:00		2015-12-13 06:45:00	270	0.44704
1.38889	2015-12-13 06:46:00		2015-12-13 06:46:00	270	0.44704
1.44444	2015-12-13 06:47:00		2015-12-13 06:47:00	270	0.44704
1.5	2015-12-13 06:48:00		2015-12-13 06:48:00	270	1.34112
1.55556	2015-12-13 06:49:00		2015-12-13 06:49:00	270	0.44704
1.61111	2015-12-13 06:50:00		2015-12-13 06:50:00	270	0.89408
1.66667	2015-12-13 06:51:00		2015-12-13 06:51:00	270	0.44704
1.72222	2015-12-13 06:52:00		2015-12-13 06:52:00	247.5	0.89408
1.77778	2015-12-13 06:53:00		2015-12-13 06:53:00	270	0.44704
1.83333	2015-12-13 06:54:00		2015-12-13 06:54:00	292.5	0.44704
1.88889	2015-12-13 06:55:00		2015-12-13 06:55:00	270	0.44704
1.94444	2015-12-13 06:56:00		2015-12-13 06:56:00	270	1.78816
2	2015-12-13 06:57:00		2015-12-13 06:57:00	270	0.44704
2.05556	2015-12-13 06:58:00		2015-12-13 06:58:00	247.5	0.89408
2.11111	2015-12-13 06:59:00		2015-12-13 06:59:00	247.5	0.44704
2.11111	2015-12-13 07:00:00		2015-12-13 07:00:00	270	0
2.11111	2015-12-13 07:01:00		2015-12-13 07:01:00	270	0.44704
2.11111	2015-12-13 07:02:00		2015-12-13 07:02:00	270	0.44704
2.16667	2015-12-13 07:03:00		2015-12-13 07:03:00	270	0.44704
2.16667	2015-12-13 07:04:00		2015-12-13 07:04:00	292.5	0.89408
2.16667	2015-12-13 07:05:00		2015-12-13 07:05:00	225	1.34112
2.22222	2015-12-13 07:06:00		2015-12-13 07:06:00	247.5	0.44704
2.22222	2015-12-13 07:07:00		2015-12-13 07:07:00	247.5	0.44704
2.22222	2015-12-13 07:08:00		2015-12-13 07:08:00	225	1.78816
2.22222	2015-12-13 07:09:00		2015-12-13 07:09:00	225	1.78816
2.22222	2015-12-13 07:10:00		2015-12-13 07:10:00	225	1.78816
2.27778	2015-12-13 07:11:00		2015-12-13 07:11:00	225	2.2352
2.27778	2015-12-13 07:12:00		2015-12-13 07:12:00	247.5	2.2352
2.33333	2015-12-13 07:13:00		2015-12-13 07:13:00	225	2.2352
2.38889	2015-12-13 07:14:00		2015-12-13 07:14:00	225	2.2352
2.38889	2015-12-13 07:15:00		2015-12-13 07:15:00	247.5	1.78816
2.38889	2015-12-13 07:16:00		2015-12-13 07:16:00	247.5	1.78816
2.38889	2015-12-13 07:17:00		2015-12-13 07:17:00	225	2.2352
2.38889	2015-12-13 07:18:00		2015-12-13 07:18:00	247.5	0.89408
2.38889	2015-12-13 07:19:00		2015-12-13 07:19:00	225	1.34112
2.33333	2015-12-13 07:20:00		2015-12-13 07:20:00	225	2.2352
2.33333	2015-12-13 07:21:00		2015-12-13 07:21:00	247.5	0.89408
2.33333	2015-12-13 07:22:00		2015-12-13 07:22:00	270	0.44704
2.33333	2015-12-13 07:23:00		2015-12-13 07:23:00	247.5	0.89408
2.33333	2015-12-13 07:24:00		2015-12-13 07:24:00	225	2.2352
2.27778	2015-12-13 07:25:00		2015-12-13 07:25:00	225	1.34112
2.27778	2015-12-13 07:26:00		2015-12-13 07:26:00	270	1.34112
2.27778	2015-12-13 07:27:00		2015-12-13 07:27:00	202.5	1.78816
2.27778	2015-12-13 07:28:00		2015-12-13 07:28:00	247.5	0.89408
2.27778	2015-12-13 07:29:00		2015-12-13 07:29:00	247.5	0.89408
2.27778	2015-12-13 07:30:00		2015-12-13 07:30:00	180	0.89408
2.27778	2015-12-13 07:31:00		2015-12-13 07:31:00	225	0.44704
2.27778	2015-12-13 07:32:00		2015-12-13 07:32:00	247.5	1.34112
2.22222	2015-12-13 07:33:00		2015-12-13 07:33:00	180	0.44704
2.27778	2015-12-13 07:34:00		2015-12-13 07:34:00	225	0
2.22222	2015-12-13 07:35:00		2015-12-13 07:35:00	247.5	0.44704
2.22222	2015-12-13 07:36:00		2015-12-13 07:36:00	270	0
2.22222	2015-12-13 07:37:00		2015-12-13 07:37:00	270	0
2.16667	2015-12-13 07:38:00		2015-12-13 07:38:00	225	0.89408
2.16667	2015-12-13 07:39:00		2015-12-13 07:39:00	225	1.78816
2.16667	2015-12-13 07:40:00		2015-12-13 07:40:00	225	1.34112
2.16667	2015-12-13 07:41:00		2015-12-13 07:41:00	225	1.34112
2.11111	2015-12-13 07:42:00		2015-12-13 07:42:00	225	0.89408
2.16667	2015-12-13 07:43:00		2015-12-13 07:43:00	247.5	1.34112
2.11111	2015-12-13 07:44:00		2015-12-13 07:44:00	270	1.34112
2.11111	2015-12-13 07:45:00		2015-12-13 07:45:00	225	1.78816
2.16667	2015-12-13 07:46:00		2015-12-13 07:46:00	247.5	1.78816
2.16667	2015-12-13 07:47:00		2015-12-13 07:47:00	247.5	0.89408
2.11111	2015-12-13 07:48:00		2015-12-13 07:48:00	225	1.78816
2.11111	2015-12-13 07:49:00		2015-12-13 07:49:00	247.5	0.44704
2.11111	2015-12-13 07:50:00		2015-12-13 07:50:00	270	0.44704
2.11111	2015-12-13 07:51:00		2015-12-13 07:51:00	225	1.34112
2.11111	2015-12-13 07:52:00		2015-12-13 07:52:00	225	1.34112
2.11111	2015-12-13 07:53:00		2015-12-13 07:53:00	247.5	0.89408
2.16667	2015-12-13 07:54:00		2015-12-13 07:54:00	225	0.89408
2.16667	2015-12-13 07:55:00		2015-12-13 07:55:00	225	1.34112
2.16667	2015-12-13 07:56:00		2015-12-13 07:56:00	247.5	0.44704
2.22222	2015-12-13 07:57:00		2015-12-13 07:57:00	270	0.44704
2.22222	2015-12-13 07:58:00		2015-12-13 07:58:00	270	0
2.22222	2015-12-13 07:59:00		2015-12-13 07:59:00	270	0.44704
2.22222	2015-12-13 08:00:00		2015-12-13 08:00:00	292.5	0
2.22222	2015-12-13 08:01:00		2015-12-13 08:01:00	292.5	0
2.22222	2015-12-13 08:02:00		2015-12-13 08:02:00	315	0
2.22222	2015-12-13 08:03:00		2015-12-13 08:03:00		0
2.22222	2015-12-13 08:04:00		2015-12-13 08:04:00	315	0
2.22222	2015-12-13 08:05:00		2015-12-13 08:05:00		0
2.22222	2015-12-13 08:06:00		2015-12-13 08:06:00		0
2.22222	2015-12-13 08:07:00		2015-12-13 08:07:00	315	0
2.16667	2015-12-13 08:08:00		2015-12-13 08:08:00	292.5	0
2.16667	2015-12-13 08:09:00		2015-12-13 08:09:00		0
2.16667	2015-12-13 08:10:00		2015-12-13 08:10:00		0
2.16667	2015-12-13 08:11:00		2015-12-13 08:11:00	315	0
2.16667	2015-12-13 08:12:00		2015-12-13 08:12:00		0
2.11111	2015-12-13 08:13:00		2015-12-13 08:13:00	0	0.44704
2.11111	2015-12-13 08:14:00		2015-12-13 08:14:00		0
2.05556	2015-12-13 08:15:00		2015-12-13 08:15:00		0
2.05556	2015-12-13 08:16:00		2015-12-13 08:16:00	337.5	0
2.05556	2015-12-13 08:17:00		2015-12-13 08:17:00	315	0
2	2015-12-13 08:18:00		2015-12-13 08:18:00	315	0.44704
2	2015-12-13 08:19:00		2015-12-13 08:19:00	292.5	0.44704
2	2015-12-13 08:20:00		2015-12-13 08:20:00	292.5	0.44704
2	2015-12-13 08:21:00		2015-12-13 08:21:00	225	0.44704
1.94444	2015-12-13 08:22:00		2015-12-13 08:22:00	247.5	0.44704
1.94444	2015-12-13 08:23:00		2015-12-13 08:23:00	247.5	0.44704
1.94444	2015-12-13 08:24:00		2015-12-13 08:24:00	270	0.44704
1.94444	2015-12-13 08:25:00		2015-12-13 08:25:00	270	0
1.94444	2015-12-13 08:26:00		2015-12-13 08:26:00	292.5	0
1.94444	2015-12-13 08:27:00		2015-12-13 08:27:00	292.5	0
1.94444	2015-12-13 08:28:00		2015-12-13 08:28:00	247.5	0.44704
1.94444	2015-12-13 08:29:00		2015-12-13 08:29:00	247.5	0.89408
2	2015-12-13 08:30:00		2015-12-13 08:30:00	225	1.78816
2.05556	2015-12-13 08:31:00		2015-12-13 08:31:00	247.5	0.44704
2.05556	2015-12-13 08:32:00		2015-12-13 08:32:00	270	0.44704
2.16667	2015-12-13 08:33:00		2015-12-13 08:33:00	270	0.44704
2.16667	2015-12-13 08:34:00		2015-12-13 08:34:00	247.5	1.34112
2.22222	2015-12-13 08:35:00		2015-12-13 08:35:00	247.5	0.89408
2.33333	2015-12-13 08:36:00		2015-12-13 08:36:00	292.5	1.34112
2.33333	2015-12-13 08:37:00		2015-12-13 08:37:00	270	0.44704
2.38889	2015-12-13 08:38:00		2015-12-13 08:38:00	247.5	0.44704
2.44444	2015-12-13 08:39:00		2015-12-13 08:39:00	270	1.34112
2.5	2015-12-13 08:40:00		2015-12-13 08:40:00	270	0.89408
2.55556	2015-12-13 08:41:00		2015-12-13 08:41:00	247.5	1.78816
2.66667	2015-12-13 08:42:00		2015-12-13 08:42:00	270	1.34112
2.77778	2015-12-13 08:43:00		2015-12-13 08:43:00	225	0.44704
2.88889	2015-12-13 08:44:00		2015-12-13 08:44:00	202.5	0.89408
2.94444	2015-12-13 08:45:00		2015-12-13 08:45:00	225	0.44704
3.05556	2015-12-13 08:46:00		2015-12-13 08:46:00	247.5	0.44704
3.11111	2015-12-13 08:47:00		2015-12-13 08:47:00	247.5	0.89408
3.22222	2015-12-13 08:48:00		2015-12-13 08:48:00	225	1.78816
3.27778	2015-12-13 08:49:00		2015-12-13 08:49:00	225	0.89408
3.38889	2015-12-13 08:50:00		2015-12-13 08:50:00	225	0.89408
3.44444	2015-12-13 08:51:00		2015-12-13 08:51:00	225	0.44704
3.55556	2015-12-13 08:52:00		2015-12-13 08:52:00	225	0.44704
3.61111	2015-12-13 08:53:00		2015-12-13 08:53:00	270	0.44704
3.66667	2015-12-13 08:54:00		2015-12-13 08:54:00	270	0.44704
3.72222	2015-12-13 08:55:00		2015-12-13 08:55:00	270	0.44704
3.77778	2015-12-13 08:56:00		2015-12-13 08:56:00	270	0.44704
3.83333	2015-12-13 08:57:00		2015-12-13 08:57:00	247.5	0.44704
3.88889	2015-12-13 08:58:00		2015-12-13 08:58:00	270	0.89408
3.94444	2015-12-13 08:59:00		2015-12-13 08:59:00	247.5	1.34112
4	2015-12-13 09:00:00		2015-12-13 09:00:00	270	0.44704
4.05556	2015-12-13 09:01:00		2015-12-13 09:01:00	270	0.89408
4.05556	2015-12-13 09:02:00		2015-12-13 09:02:00	270	0.89408
4.11111	2015-12-13 09:03:00		2015-12-13 09:03:00	270	0.44704
4.16667	2015-12-13 09:04:00		2015-12-13 09:04:00	270	0.89408
4.16667	2015-12-13 09:05:00		2015-12-13 09:05:00	270	0.44704
4.22222	2015-12-13 09:06:00		2015-12-13 09:06:00	292.5	0.44704
4.22222	2015-12-13 09:07:00		2015-12-13 09:07:00	292.5	0.44704
4.27778	2015-12-13 09:08:00		2015-12-13 09:08:00	292.5	0.44704
4.27778	2015-12-13 09:09:00		2015-12-13 09:09:00	292.5	0.44704
4.33333	2015-12-13 09:10:00		2015-12-13 09:10:00	270	0.44704
4.33333	2015-12-13 09:11:00		2015-12-13 09:11:00	270	0.44704
4.38889	2015-12-13 09:12:00		2015-12-13 09:12:00	270	0.89408
4.44444	2015-12-13 09:13:00		2015-12-13 09:13:00	247.5	0.89408
4.5	2015-12-13 09:14:00		2015-12-13 09:14:00	202.5	0.89408
4.5	2015-12-13 09:15:00		2015-12-13 09:15:00	225	0.89408
4.55556	2015-12-13 09:16:00		2015-12-13 09:16:00	225	0.89408
4.61111	2015-12-13 09:17:00		2015-12-13 09:17:00	225	2.2352
4.61111	2015-12-13 09:18:00		2015-12-13 09:18:00	202.5	0.89408
4.61111	2015-12-13 09:19:00		2015-12-13 09:19:00	247.5	0.89408
4.66667	2015-12-13 09:20:00		2015-12-13 09:20:00	202.5	2.2352
4.66667	2015-12-13 09:21:00		2015-12-13 09:21:00	247.5	1.34112
4.66667	2015-12-13 09:22:00		2015-12-13 09:22:00	247.5	1.34112
4.72222	2015-12-13 09:23:00		2015-12-13 09:23:00	247.5	0.89408
4.72222	2015-12-13 09:24:00		2015-12-13 09:24:00	225	1.78816
4.77778	2015-12-13 09:25:00		2015-12-13 09:25:00	247.5	1.34112
4.83333	2015-12-13 09:26:00		2015-12-13 09:26:00	270	1.78816
4.83333	2015-12-13 09:27:00		2015-12-13 09:27:00	270	1.34112
4.88889	2015-12-13 09:28:00		2015-12-13 09:28:00	270	0.44704
4.94444	2015-12-13 09:29:00		2015-12-13 09:29:00	270	0.89408
5	2015-12-13 09:30:00		2015-12-13 09:30:00	225	0.44704
5.05556	2015-12-13 09:31:00		2015-12-13 09:31:00	225	0
5.16667	2015-12-13 09:32:00		2015-12-13 09:32:00	202.5	0.89408
5.22222	2015-12-13 09:33:00		2015-12-13 09:33:00	202.5	0.44704
5.33333	2015-12-13 09:34:00		2015-12-13 09:34:00	202.5	0.44704
5.38889	2015-12-13 09:35:00		2015-12-13 09:35:00	157.5	0.44704
5.44444	2015-12-13 09:36:00		2015-12-13 09:36:00	180	0
5.5	2015-12-13 09:37:00		2015-12-13 09:37:00	202.5	0
5.61111	2015-12-13 09:38:00		2015-12-13 09:38:00	247.5	0
5.72222	2015-12-13 09:39:00		2015-12-13 09:39:00	247.5	0
5.77778	2015-12-13 09:40:00		2015-12-13 09:40:00	247.5	0.89408
5.83333	2015-12-13 09:41:00		2015-12-13 09:41:00	247.5	0.44704
5.88889	2015-12-13 09:42:00		2015-12-13 09:42:00	247.5	0.44704
5.94444	2015-12-13 09:43:00		2015-12-13 09:43:00	247.5	0.44704
6	2015-12-13 09:44:00		2015-12-13 09:44:00	270	0.44704
6	2015-12-13 09:45:00		2015-12-13 09:45:00	247.5	0.89408
6.05556	2015-12-13 09:46:00		2015-12-13 09:46:00	270	0.44704
6.05556	2015-12-13 09:47:00		2015-12-13 09:47:00	270	0.44704
6.05556	2015-12-13 09:48:00		2015-12-13 09:48:00	292.5	0.44704
6.05556	2015-12-13 09:49:00		2015-12-13 09:49:00	270	0.44704
6.11111	2015-12-13 09:50:00		2015-12-13 09:50:00	270	0.44704
6.11111	2015-12-13 09:51:00		2015-12-13 09:51:00	270	0.89408
6.11111	2015-12-13 09:52:00		2015-12-13 09:52:00	270	0.44704
6.16667	2015-12-13 09:53:00		2015-12-13 09:53:00	292.5	0.44704
6.16667	2015-12-13 09:54:00		2015-12-13 09:54:00	292.5	0.44704
6.22222	2015-12-13 09:55:00		2015-12-13 09:55:00	292.5	0.89408
6.22222	2015-12-13 09:56:00		2015-12-13 09:56:00	270	1.34112
6.16667	2015-12-13 09:57:00		2015-12-13 09:57:00	270	1.34112
6.16667	2015-12-13 09:58:00		2015-12-13 09:58:00	270	0.89408
6.11111	2015-12-13 09:59:00		2015-12-13 09:59:00	270	1.34112
6.11111	2015-12-13 10:00:00		2015-12-13 10:00:00	270	0.89408
6.11111	2015-12-13 10:01:00		2015-12-13 10:01:00	292.5	1.34112
6.05556	2015-12-13 10:02:00		2015-12-13 10:02:00	270	1.34112
6.05556	2015-12-13 10:03:00		2015-12-13 10:03:00	292.5	0.44704
6.05556	2015-12-13 10:04:00		2015-12-13 10:04:00	270	0.89408
6.11111	2015-12-13 10:05:00		2015-12-13 10:05:00	292.5	0.89408
6.16667	2015-12-13 10:06:00		2015-12-13 10:06:00	270	0.44704
6.16667	2015-12-13 10:07:00		2015-12-13 10:07:00	270	0.89408
6.22222	2015-12-13 10:08:00		2015-12-13 10:08:00	292.5	0.89408
6.22222	2015-12-13 10:09:00		2015-12-13 10:09:00	270	1.34112
6.27778	2015-12-13 10:10:00		2015-12-13 10:10:00	270	0.44704
6.33333	2015-12-13 10:11:00		2015-12-13 10:11:00	292.5	1.78816
6.33333	2015-12-13 10:12:00		2015-12-13 10:12:00	270	0.89408
6.33333	2015-12-13 10:13:00		2015-12-13 10:13:00	247.5	2.2352
6.33333	2015-12-13 10:14:00		2015-12-13 10:14:00	270	1.78816
6.33333	2015-12-13 10:15:00		2015-12-13 10:15:00	270	0.89408
6.33333	2015-12-13 10:16:00		2015-12-13 10:16:00	247.5	1.34112
6.33333	2015-12-13 10:17:00		2015-12-13 10:17:00	270	0.89408
6.33333	2015-12-13 10:18:00		2015-12-13 10:18:00	270	0.89408
6.33333	2015-12-13 10:19:00		2015-12-13 10:19:00	270	1.34112
6.38889	2015-12-13 10:20:00		2015-12-13 10:20:00	270	0.89408
6.38889	2015-12-13 10:21:00		2015-12-13 10:21:00	270	1.34112
6.38889	2015-12-13 10:22:00		2015-12-13 10:22:00	270	0.89408
6.38889	2015-12-13 10:23:00		2015-12-13 10:23:00	270	0.89408
6.44444	2015-12-13 10:24:00		2015-12-13 10:24:00	270	0.89408
6.44444	2015-12-13 10:25:00		2015-12-13 10:25:00	292.5	0.89408
6.44444	2015-12-13 10:26:00		2015-12-13 10:26:00	247.5	0.44704
6.5	2015-12-13 10:27:00		2015-12-13 10:27:00	270	0.89408
6.5	2015-12-13 10:28:00		2015-12-13 10:28:00	270	0.89408
6.55556	2015-12-13 10:29:00		2015-12-13 10:29:00	270	1.78816
6.5	2015-12-13 10:30:00		2015-12-13 10:30:00	270	1.34112
6.5	2015-12-13 10:31:00		2015-12-13 10:31:00	202.5	2.68224
6.44444	2015-12-13 10:32:00		2015-12-13 10:32:00	225	1.78816
6.44444	2015-12-13 10:33:00		2015-12-13 10:33:00	247.5	2.2352
6.44444	2015-12-13 10:34:00		2015-12-13 10:34:00	270	1.34112
6.44444	2015-12-13 10:35:00		2015-12-13 10:35:00	270	0.89408
6.44444	2015-12-13 10:36:00		2015-12-13 10:36:00	270	2.2352
6.44444	2015-12-13 10:37:00		2015-12-13 10:37:00	247.5	2.68224
6.38889	2015-12-13 10:38:00		2015-12-13 10:38:00	225	1.78816
6.33333	2015-12-13 10:39:00		2015-12-13 10:39:00	202.5	2.2352
6.33333	2015-12-13 10:40:00		2015-12-13 10:40:00	225	2.68224
6.27778	2015-12-13 10:41:00		2015-12-13 10:41:00	202.5	2.2352
6.27778	2015-12-13 10:42:00		2015-12-13 10:42:00	202.5	1.34112
6.33333	2015-12-13 10:43:00		2015-12-13 10:43:00	202.5	1.78816
6.33333	2015-12-13 10:44:00		2015-12-13 10:44:00	202.5	2.68224
6.33333	2015-12-13 10:45:00		2015-12-13 10:45:00	225	1.78816
6.38889	2015-12-13 10:46:00		2015-12-13 10:46:00	225	2.2352
6.38889	2015-12-13 10:47:00		2015-12-13 10:47:00	292.5	0.89408
6.44444	2015-12-13 10:48:00		2015-12-13 10:48:00	225	0.89408
6.55556	2015-12-13 10:49:00		2015-12-13 10:49:00	247.5	0.44704
6.61111	2015-12-13 10:50:00		2015-12-13 10:50:00	270	0
6.72222	2015-12-13 10:51:00		2015-12-13 10:51:00	270	0.89408
6.77778	2015-12-13 10:52:00		2015-12-13 10:52:00	247.5	1.78816
6.77778	2015-12-13 10:53:00		2015-12-13 10:53:00	225	1.78816
6.83333	2015-12-13 10:54:00		2015-12-13 10:54:00	247.5	0.89408
6.88889	2015-12-13 10:55:00		2015-12-13 10:55:00	225	2.68224
6.83333	2015-12-13 10:56:00		2015-12-13 10:56:00	225	3.12928
6.77778	2015-12-13 10:57:00		2015-12-13 10:57:00	202.5	2.68224
6.77778	2015-12-13 10:58:00		2015-12-13 10:58:00	225	2.2352
6.72222	2015-12-13 10:59:00		2015-12-13 10:59:00	225	2.68224
6.72222	2015-12-13 11:00:00		2015-12-13 11:00:00	225	0.89408
6.72222	2015-12-13 11:01:00		2015-12-13 11:01:00	202.5	0.44704
6.77778	2015-12-13 11:02:00		2015-12-13 11:02:00	202.5	1.34112
6.83333	2015-12-13 11:03:00		2015-12-13 11:03:00	247.5	2.2352
6.83333	2015-12-13 11:04:00		2015-12-13 11:04:00	225	2.2352
6.83333	2015-12-13 11:05:00		2015-12-13 11:05:00	202.5	2.2352
6.88889	2015-12-13 11:06:00		2015-12-13 11:06:00	202.5	0.89408
6.94444	2015-12-13 11:07:00		2015-12-13 11:07:00	157.5	0.89408
7	2015-12-13 11:08:00		2015-12-13 11:08:00	180	0.89408
7	2015-12-13 11:09:00		2015-12-13 11:09:00	225	3.12928
7	2015-12-13 11:10:00		2015-12-13 11:10:00	180	1.78816
7	2015-12-13 11:11:00		2015-12-13 11:11:00	202.5	1.78816
7.05556	2015-12-13 11:12:00		2015-12-13 11:12:00	202.5	2.2352
7.05556	2015-12-13 11:13:00		2015-12-13 11:13:00	202.5	1.78816
7.05556	2015-12-13 11:14:00		2015-12-13 11:14:00	202.5	1.78816
7.11111	2015-12-13 11:15:00		2015-12-13 11:15:00	225	2.68224
7.11111	2015-12-13 11:16:00		2015-12-13 11:16:00	247.5	1.78816
7.16667	2015-12-13 11:17:00		2015-12-13 11:17:00	225	1.34112
7.22222	2015-12-13 11:18:00		2015-12-13 11:18:00	225	0.89408
7.27778	2015-12-13 11:19:00		2015-12-13 11:19:00	225	0.89408
7.33333	2015-12-13 11:20:00		2015-12-13 11:20:00	180	1.78816
7.38889	2015-12-13 11:21:00		2015-12-13 11:21:00	225	1.78816
7.5	2015-12-13 11:22:00		2015-12-13 11:22:00	247.5	0.89408
7.55556	2015-12-13 11:23:00		2015-12-13 11:23:00	225	0.89408
7.61111	2015-12-13 11:24:00		2015-12-13 11:24:00	247.5	2.2352
7.66667	2015-12-13 11:25:00		2015-12-13 11:25:00	247.5	0.89408
7.66667	2015-12-13 11:26:00		2015-12-13 11:26:00	202.5	1.34112
7.72222	2015-12-13 11:27:00		2015-12-13 11:27:00	180	0.89408
7.77778	2015-12-13 11:28:00		2015-12-13 11:28:00	225	1.78816
7.77778	2015-12-13 11:29:00		2015-12-13 11:29:00	202.5	1.78816
7.77778	2015-12-13 11:30:00		2015-12-13 11:30:00	180	1.34112
7.77778	2015-12-13 11:31:00		2015-12-13 11:31:00	202.5	1.34112
7.77778	2015-12-13 11:32:00		2015-12-13 11:32:00	157.5	0.89408
7.83333	2015-12-13 11:33:00		2015-12-13 11:33:00	247.5	1.34112
7.83333	2015-12-13 11:34:00		2015-12-13 11:34:00	225	0.89408
7.88889	2015-12-13 11:35:00		2015-12-13 11:35:00	202.5	0
7.94444	2015-12-13 11:36:00		2015-12-13 11:36:00	270	1.34112
8	2015-12-13 11:37:00		2015-12-13 11:37:00	270	0.89408
8.05556	2015-12-13 11:38:00		2015-12-13 11:38:00	292.5	0.89408
8.11111	2015-12-13 11:39:00		2015-12-13 11:39:00	292.5	0.44704
8.16667	2015-12-13 11:40:00		2015-12-13 11:40:00	292.5	0.44704
8.22222	2015-12-13 11:41:00		2015-12-13 11:41:00	225	0.89408
8.27778	2015-12-13 11:42:00		2015-12-13 11:42:00	135	0.89408
8.33333	2015-12-13 11:43:00		2015-12-13 11:43:00	135	0.44704
8.38889	2015-12-13 11:44:00		2015-12-13 11:44:00	202.5	0.89408
8.38889	2015-12-13 11:45:00		2015-12-13 11:45:00	247.5	0.44704
8.44444	2015-12-13 11:46:00		2015-12-13 11:46:00	247.5	0.44704
8.44444	2015-12-13 11:47:00		2015-12-13 11:47:00	202.5	0.89408
8.5	2015-12-13 11:48:00		2015-12-13 11:48:00	225	0.89408
8.5	2015-12-13 11:49:00		2015-12-13 11:49:00	202.5	0.89408
8.55556	2015-12-13 11:50:00		2015-12-13 11:50:00	292.5	0.44704
8.55556	2015-12-13 11:51:00		2015-12-13 11:51:00	292.5	0.89408
8.55556	2015-12-13 11:52:00		2015-12-13 11:52:00	292.5	0.44704
8.61111	2015-12-13 11:53:00		2015-12-13 11:53:00	292.5	0.44704
8.66667	2015-12-13 11:54:00		2015-12-13 11:54:00	315	0.44704
8.66667	2015-12-13 11:55:00		2015-12-13 11:55:00	337.5	0.44704
8.72222	2015-12-13 11:56:00		2015-12-13 11:56:00	337.5	0.44704
8.72222	2015-12-13 11:57:00		2015-12-13 11:57:00	315	0.44704
8.77778	2015-12-13 11:58:00		2015-12-13 11:58:00	225	0.89408
8.77778	2015-12-13 11:59:00		2015-12-13 11:59:00	247.5	0.89408
8.77778	2015-12-13 12:00:00		2015-12-13 12:00:00	270	1.34112
8.72222	2015-12-13 12:01:00		2015-12-13 12:01:00	270	1.78816
8.66667	2015-12-13 12:02:00		2015-12-13 12:02:00	270	1.34112
8.61111	2015-12-13 12:03:00		2015-12-13 12:03:00	270	0.44704
8.55556	2015-12-13 12:04:00		2015-12-13 12:04:00	270	0.89408
8.5	2015-12-13 12:05:00		2015-12-13 12:05:00	202.5	0.89408
8.5	2015-12-13 12:06:00		2015-12-13 12:06:00	225	1.78816
8.44444	2015-12-13 12:07:00		2015-12-13 12:07:00	247.5	0.89408
8.38889	2015-12-13 12:08:00		2015-12-13 12:08:00	225	0.89408
8.38889	2015-12-13 12:09:00		2015-12-13 12:09:00	247.5	0.44704
8.44444	2015-12-13 12:10:00		2015-12-13 12:10:00	292.5	0.44704
8.44444	2015-12-13 12:11:00		2015-12-13 12:11:00	247.5	1.34112
8.44444	2015-12-13 12:12:00		2015-12-13 12:12:00	247.5	0.89408
8.38889	2015-12-13 12:13:00		2015-12-13 12:13:00	247.5	0.89408
8.38889	2015-12-13 12:14:00		2015-12-13 12:14:00	270	0.89408
8.33333	2015-12-13 12:15:00		2015-12-13 12:15:00	292.5	0.89408
8.38889	2015-12-13 12:16:00		2015-12-13 12:16:00	315	0.44704
8.44444	2015-12-13 12:17:00		2015-12-13 12:17:00	292.5	0.44704
8.44444	2015-12-13 12:18:00		2015-12-13 12:18:00	292.5	0
8.5	2015-12-13 12:19:00		2015-12-13 12:19:00	292.5	0
8.55556	2015-12-13 12:20:00		2015-12-13 12:20:00	292.5	0.44704
8.55556	2015-12-13 12:21:00		2015-12-13 12:21:00	292.5	0.44704
8.61111	2015-12-13 12:22:00		2015-12-13 12:22:00	292.5	0
8.61111	2015-12-13 12:23:00		2015-12-13 12:23:00	292.5	0.44704
8.61111	2015-12-13 12:24:00		2015-12-13 12:24:00	292.5	0.44704
8.61111	2015-12-13 12:25:00		2015-12-13 12:25:00	270	0.44704
8.61111	2015-12-13 12:26:00		2015-12-13 12:26:00	270	0.44704
8.61111	2015-12-13 12:27:00		2015-12-13 12:27:00	270	0.44704
8.61111	2015-12-13 12:28:00		2015-12-13 12:28:00	225	1.78816
8.55556	2015-12-13 12:29:00		2015-12-13 12:29:00	247.5	1.78816
8.44444	2015-12-13 12:30:00		2015-12-13 12:30:00	270	0.89408
8.38889	2015-12-13 12:31:00		2015-12-13 12:31:00	225	1.34112
8.27778	2015-12-13 12:32:00		2015-12-13 12:32:00	247.5	1.34112
8.27778	2015-12-13 12:33:00		2015-12-13 12:33:00	225	1.34112
8.22222	2015-12-13 12:34:00		2015-12-13 12:34:00	247.5	1.34112
8.22222	2015-12-13 12:35:00		2015-12-13 12:35:00	225	0.89408
8.16667	2015-12-13 12:36:00		2015-12-13 12:36:00	292.5	0.44704
8.22222	2015-12-13 12:37:00		2015-12-13 12:37:00	270	0.44704
8.22222	2015-12-13 12:38:00		2015-12-13 12:38:00	270	0.44704
8.27778	2015-12-13 12:39:00		2015-12-13 12:39:00	270	0.89408
8.27778	2015-12-13 12:40:00		2015-12-13 12:40:00	247.5	1.34112
8.27778	2015-12-13 12:41:00		2015-12-13 12:41:00	247.5	0.44704
8.27778	2015-12-13 12:42:00		2015-12-13 12:42:00	270	0.44704
8.27778	2015-12-13 12:43:00		2015-12-13 12:43:00	247.5	0.44704
8.33333	2015-12-13 12:44:00		2015-12-13 12:44:00	270	0.44704
8.38889	2015-12-13 12:45:00		2015-12-13 12:45:00	292.5	0.89408
8.38889	2015-12-13 12:46:00		2015-12-13 12:46:00	247.5	1.34112
8.38889	2015-12-13 12:47:00		2015-12-13 12:47:00	225	0.89408
8.38889	2015-12-13 12:48:00		2015-12-13 12:48:00	225	0.44704
8.38889	2015-12-13 12:49:00		2015-12-13 12:49:00	202.5	0.89408
8.33333	2015-12-13 12:50:00		2015-12-13 12:50:00	202.5	1.34112
8.33333	2015-12-13 12:51:00		2015-12-13 12:51:00	247.5	0.89408
8.33333	2015-12-13 12:52:00		2015-12-13 12:52:00	247.5	0.89408
8.33333	2015-12-13 12:53:00		2015-12-13 12:53:00	270	0.89408
8.27778	2015-12-13 12:54:00		2015-12-13 12:54:00	270	0.44704
8.27778	2015-12-13 12:55:00		2015-12-13 12:55:00	270	0
8.27778	2015-12-13 12:56:00		2015-12-13 12:56:00	292.5	0.44704
8.27778	2015-12-13 12:57:00		2015-12-13 12:57:00	292.5	0.89408
8.27778	2015-12-13 12:58:00		2015-12-13 12:58:00	225	1.78816
8.16667	2015-12-13 12:59:00		2015-12-13 12:59:00	225	1.34112
8.16667	2015-12-13 13:00:00		2015-12-13 13:00:00	225	0.89408
8.11111	2015-12-13 13:01:00		2015-12-13 13:01:00	225	0.89408
8	2015-12-13 13:02:00		2015-12-13 13:02:00	247.5	0.89408
8	2015-12-13 13:03:00		2015-12-13 13:03:00	247.5	0.44704
7.94444	2015-12-13 13:04:00		2015-12-13 13:04:00	270	0.44704
7.94444	2015-12-13 13:05:00		2015-12-13 13:05:00	270	0.44704
7.94444	2015-12-13 13:06:00		2015-12-13 13:06:00	225	1.34112
7.88889	2015-12-13 13:07:00		2015-12-13 13:07:00	225	0.44704
7.88889	2015-12-13 13:08:00		2015-12-13 13:08:00	247.5	0.44704
7.88889	2015-12-13 13:09:00		2015-12-13 13:09:00	247.5	0.44704
7.94444	2015-12-13 13:10:00		2015-12-13 13:10:00	202.5	0.89408
7.94444	2015-12-13 13:11:00		2015-12-13 13:11:00	225	0
7.94444	2015-12-13 13:12:00		2015-12-13 13:12:00	225	0
8	2015-12-13 13:13:00		2015-12-13 13:13:00		0
8	2015-12-13 13:14:00		2015-12-13 13:14:00	247.5	0
8.05556	2015-12-13 13:15:00		2015-12-13 13:15:00	247.5	0.44704
8.11111	2015-12-13 13:16:00		2015-12-13 13:16:00	247.5	0
8.11111	2015-12-13 13:17:00		2015-12-13 13:17:00		0
8.16667	2015-12-13 13:18:00		2015-12-13 13:18:00	270	0
8.16667	2015-12-13 13:19:00		2015-12-13 13:19:00	270	0.44704
8.22222	2015-12-13 13:20:00		2015-12-13 13:20:00	292.5	0.44704
8.22222	2015-12-13 13:21:00		2015-12-13 13:21:00	292.5	0.44704
8.22222	2015-12-13 13:22:00		2015-12-13 13:22:00	292.5	0
8.27778	2015-12-13 13:23:00		2015-12-13 13:23:00	292.5	0
8.27778	2015-12-13 13:24:00		2015-12-13 13:24:00	292.5	0.44704
8.27778	2015-12-13 13:25:00		2015-12-13 13:25:00	292.5	0
8.27778	2015-12-13 13:26:00		2015-12-13 13:26:00	292.5	0
8.27778	2015-12-13 13:27:00		2015-12-13 13:27:00	292.5	0
8.27778	2015-12-13 13:28:00		2015-12-13 13:28:00	292.5	0
8.27778	2015-12-13 13:29:00		2015-12-13 13:29:00	225	0.89408
8.27778	2015-12-13 13:30:00		2015-12-13 13:30:00	225	0
8.27778	2015-12-13 13:31:00		2015-12-13 13:31:00		0
8.27778	2015-12-13 13:32:00		2015-12-13 13:32:00	292.5	0
8.27778	2015-12-13 13:33:00		2015-12-13 13:33:00	292.5	0
8.27778	2015-12-13 13:34:00		2015-12-13 13:34:00	315	0
8.27778	2015-12-13 13:35:00		2015-12-13 13:35:00	315	0.44704
8.33333	2015-12-13 13:36:00		2015-12-13 13:36:00	337.5	0.44704
8.33333	2015-12-13 13:37:00		2015-12-13 13:37:00	337.5	0.44704
8.33333	2015-12-13 13:38:00		2015-12-13 13:38:00	337.5	0
8.33333	2015-12-13 13:39:00		2015-12-13 13:39:00	337.5	0.44704
8.33333	2015-12-13 13:40:00		2015-12-13 13:40:00	337.5	0
8.33333	2015-12-13 13:41:00		2015-12-13 13:41:00	337.5	0
8.33333	2015-12-13 13:42:00		2015-12-13 13:42:00	337.5	0
8.33333	2015-12-13 13:43:00		2015-12-13 13:43:00	337.5	0
8.33333	2015-12-13 13:44:00		2015-12-13 13:44:00	315	0.44704
8.27778	2015-12-13 13:45:00		2015-12-13 13:45:00	292.5	0
8.27778	2015-12-13 13:46:00		2015-12-13 13:46:00		0
8.27778	2015-12-13 13:47:00		2015-12-13 13:47:00		0
8.27778	2015-12-13 13:48:00		2015-12-13 13:48:00		0
8.27778	2015-12-13 13:49:00		2015-12-13 13:49:00		0
8.27778	2015-12-13 13:50:00		2015-12-13 13:50:00		0
8.27778	2015-12-13 13:51:00		2015-12-13 13:51:00	315	0
8.27778	2015-12-13 13:52:00		2015-12-13 13:52:00	315	0
8.27778	2015-12-13 13:53:00		2015-12-13 13:53:00	315	0
8.27778	2015-12-13 13:54:00		2015-12-13 13:54:00	337.5	0.44704
8.22222	2015-12-13 13:55:00		2015-12-13 13:55:00	337.5	0
8.22222	2015-12-13 13:56:00		2015-12-13 13:56:00	337.5	0
8.22222	2015-12-13 13:57:00		2015-12-13 13:57:00	337.5	0
8.16667	2015-12-13 13:58:00		2015-12-13 13:58:00	315	0
8.16667	2015-12-13 13:59:00		2015-12-13 13:59:00	315	0
8.11111	2015-12-13 14:00:00		2015-12-13 14:00:00	292.5	0.44704
8.05556	2015-12-13 14:01:00		2015-12-13 14:01:00	292.5	0.44704
8	2015-12-13 14:02:00		2015-12-13 14:02:00	292.5	0.44704
7.94444	2015-12-13 14:03:00		2015-12-13 14:03:00	315	0.44704
7.94444	2015-12-13 14:04:00		2015-12-13 14:04:00	292.5	0.44704
7.88889	2015-12-13 14:05:00		2015-12-13 14:05:00	292.5	0.44704
7.83333	2015-12-13 14:06:00		2015-12-13 14:06:00	270	0.44704
7.77778	2015-12-13 14:07:00		2015-12-13 14:07:00	270	0
7.72222	2015-12-13 14:08:00		2015-12-13 14:08:00	270	0.44704
7.72222	2015-12-13 14:09:00		2015-12-13 14:09:00	292.5	0.44704
7.66667	2015-12-13 14:10:00		2015-12-13 14:10:00	292.5	0
7.61111	2015-12-13 14:11:00		2015-12-13 14:11:00	292.5	0
7.55556	2015-12-13 14:12:00		2015-12-13 14:12:00	292.5	0
7.55556	2015-12-13 14:13:00		2015-12-13 14:13:00	270	0.44704
7.5	2015-12-13 14:14:00		2015-12-13 14:14:00	270	0
7.5	2015-12-13 14:15:00		2015-12-13 14:15:00	270	0.44704
7.44444	2015-12-13 14:16:00		2015-12-13 14:16:00	270	0.44704
7.38889	2015-12-13 14:17:00		2015-12-13 14:17:00	270	0
7.38889	2015-12-13 14:18:00		2015-12-13 14:18:00		0
7.38889	2015-12-13 14:19:00		2015-12-13 14:19:00	292.5	0
7.33333	2015-12-13 14:20:00		2015-12-13 14:20:00	270	0.44704
7.33333	2015-12-13 14:21:00		2015-12-13 14:21:00	247.5	0.44704
7.27778	2015-12-13 14:22:00		2015-12-13 14:22:00	247.5	0.44704
7.27778	2015-12-13 14:23:00		2015-12-13 14:23:00	247.5	0.44704
7.22222	2015-12-13 14:24:00		2015-12-13 14:24:00	247.5	0.44704
7.22222	2015-12-13 14:25:00		2015-12-13 14:25:00	247.5	0.44704
7.16667	2015-12-13 14:26:00		2015-12-13 14:26:00	247.5	0.44704
7.11111	2015-12-13 14:27:00		2015-12-13 14:27:00	225	1.34112
7.05556	2015-12-13 14:28:00		2015-12-13 14:28:00	247.5	0.44704
7.05556	2015-12-13 14:29:00		2015-12-13 14:29:00	247.5	0.44704
7.05556	2015-12-13 14:30:00		2015-12-13 14:30:00	270	0.89408
7	2015-12-13 14:31:00		2015-12-13 14:31:00	270	0.44704
7	2015-12-13 14:32:00		2015-12-13 14:32:00	270	0.44704
6.94444	2015-12-13 14:33:00		2015-12-13 14:33:00	270	0.44704
6.94444	2015-12-13 14:34:00		2015-12-13 14:34:00	247.5	0.44704
6.94444	2015-12-13 14:35:00		2015-12-13 14:35:00	270	0
6.94444	2015-12-13 14:36:00		2015-12-13 14:36:00		0
6.94444	2015-12-13 14:37:00		2015-12-13 14:37:00		0
6.94444	2015-12-13 14:38:00		2015-12-13 14:38:00	247.5	0
6.88889	2015-12-13 14:39:00		2015-12-13 14:39:00	247.5	0.44704
6.88889	2015-12-13 14:40:00		2015-12-13 14:40:00	247.5	0.44704
6.88889	2015-12-13 14:41:00		2015-12-13 14:41:00	247.5	0
6.83333	2015-12-13 14:42:00		2015-12-13 14:42:00	270	0
6.83333	2015-12-13 14:43:00		2015-12-13 14:43:00	270	0
6.83333	2015-12-13 14:44:00		2015-12-13 14:44:00		0
6.77778	2015-12-13 14:45:00		2015-12-13 14:45:00		0
6.77778	2015-12-13 14:46:00		2015-12-13 14:46:00		0
6.77778	2015-12-13 14:47:00		2015-12-13 14:47:00	270	0
6.72222	2015-12-13 14:48:00		2015-12-13 14:48:00	270	0
6.72222	2015-12-13 14:49:00		2015-12-13 14:49:00	292.5	0
6.66667	2015-12-13 14:50:00		2015-12-13 14:50:00		0
6.66667	2015-12-13 14:51:00		2015-12-13 14:51:00		0
6.61111	2015-12-13 14:52:00		2015-12-13 14:52:00	292.5	0
6.55556	2015-12-13 14:53:00		2015-12-13 14:53:00	292.5	0
6.55556	2015-12-13 14:54:00		2015-12-13 14:54:00	270	0.44704
6.44444	2015-12-13 14:55:00		2015-12-13 14:55:00	247.5	0.44704
6.44444	2015-12-13 14:56:00		2015-12-13 14:56:00	225	0.44704
6.38889	2015-12-13 14:57:00		2015-12-13 14:57:00	225	0.44704
6.33333	2015-12-13 14:58:00		2015-12-13 14:58:00	202.5	0.44704
6.33333	2015-12-13 14:59:00		2015-12-13 14:59:00	202.5	0.44704
6.27778	2015-12-13 15:00:00		2015-12-13 15:00:00	202.5	0.89408
6.22222	2015-12-13 15:01:00		2015-12-13 15:01:00	202.5	0.89408
6.16667	2015-12-13 15:02:00		2015-12-13 15:02:00	202.5	0.89408
6.16667	2015-12-13 15:03:00		2015-12-13 15:03:00	202.5	0.89408
6.11111	2015-12-13 15:04:00		2015-12-13 15:04:00	202.5	0.44704
6.05556	2015-12-13 15:05:00		2015-12-13 15:05:00	202.5	0.44704
6	2015-12-13 15:06:00		2015-12-13 15:06:00	202.5	0.44704
5.94444	2015-12-13 15:07:00		2015-12-13 15:07:00	202.5	0.44704
5.94444	2015-12-13 15:08:00		2015-12-13 15:08:00	202.5	0.44704
5.88889	2015-12-13 15:09:00		2015-12-13 15:09:00	202.5	0.44704
5.83333	2015-12-13 15:10:00		2015-12-13 15:10:00	202.5	0.44704
5.77778	2015-12-13 15:11:00		2015-12-13 15:11:00	202.5	0.44704
5.77778	2015-12-13 15:12:00		2015-12-13 15:12:00	202.5	0.44704
5.72222	2015-12-13 15:13:00		2015-12-13 15:13:00	202.5	0.44704
5.72222	2015-12-13 15:14:00		2015-12-13 15:14:00	202.5	0.44704
5.66667	2015-12-13 15:15:00		2015-12-13 15:15:00	202.5	0.44704
5.61111	2015-12-13 15:16:00		2015-12-13 15:16:00	202.5	0.44704
5.61111	2015-12-13 15:17:00		2015-12-13 15:17:00	202.5	0.44704
5.55556	2015-12-13 15:18:00		2015-12-13 15:18:00	202.5	0.89408
5.5	2015-12-13 15:19:00		2015-12-13 15:19:00	202.5	0.89408
5.5	2015-12-13 15:20:00		2015-12-13 15:20:00	202.5	0.89408
5.44444	2015-12-13 15:21:00		2015-12-13 15:21:00	202.5	0.89408
5.38889	2015-12-13 15:22:00		2015-12-13 15:22:00	202.5	0.44704
5.33333	2015-12-13 15:23:00		2015-12-13 15:23:00	202.5	0.89408
5.33333	2015-12-13 15:24:00		2015-12-13 15:24:00	202.5	0.89408
5.27778	2015-12-13 15:25:00		2015-12-13 15:25:00	202.5	0.44704
5.22222	2015-12-13 15:26:00		2015-12-13 15:26:00	202.5	0.44704
5.22222	2015-12-13 15:27:00		2015-12-13 15:27:00	202.5	0.89408
5.16667	2015-12-13 15:28:00		2015-12-13 15:28:00	202.5	0.89408
5.11111	2015-12-13 15:29:00		2015-12-13 15:29:00	202.5	0.89408
5.05556	2015-12-13 15:30:00		2015-12-13 15:30:00	202.5	0.89408
5.05556	2015-12-13 15:31:00		2015-12-13 15:31:00	202.5	0.89408
4.94444	2015-12-13 15:32:00		2015-12-13 15:32:00	202.5	0.89408
4.94444	2015-12-13 15:33:00		2015-12-13 15:33:00	202.5	0.89408
4.88889	2015-12-13 15:34:00		2015-12-13 15:34:00	225	0.89408
4.88889	2015-12-13 15:35:00		2015-12-13 15:35:00	225	0.89408
4.83333	2015-12-13 15:36:00		2015-12-13 15:36:00	225	0.89408
4.83333	2015-12-13 15:37:00		2015-12-13 15:37:00	225	0.89408
4.77778	2015-12-13 15:38:00		2015-12-13 15:38:00	225	0.89408
4.77778	2015-12-13 15:39:00		2015-12-13 15:39:00	202.5	0.89408
4.77778	2015-12-13 15:40:00		2015-12-13 15:40:00	202.5	0.89408
4.72222	2015-12-13 15:41:00		2015-12-13 15:41:00	225	0.89408
4.72222	2015-12-13 15:42:00		2015-12-13 15:42:00	225	0.89408
4.66667	2015-12-13 15:43:00		2015-12-13 15:43:00	225	0.89408
4.66667	2015-12-13 15:44:00		2015-12-13 15:44:00	225	0.89408
4.66667	2015-12-13 15:45:00		2015-12-13 15:45:00	225	0.89408
4.66667	2015-12-13 15:46:00		2015-12-13 15:46:00	225	0.89408
4.61111	2015-12-13 15:47:00		2015-12-13 15:47:00	225	0.89408
4.61111	2015-12-13 15:48:00		2015-12-13 15:48:00	225	0.89408
4.61111	2015-12-13 15:49:00		2015-12-13 15:49:00	225	0.89408
4.55556	2015-12-13 15:50:00		2015-12-13 15:50:00	225	0.89408
4.55556	2015-12-13 15:51:00		2015-12-13 15:51:00	225	0.89408
4.55556	2015-12-13 15:52:00		2015-12-13 15:52:00	225	0.44704
4.55556	2015-12-13 15:53:00		2015-12-13 15:53:00	225	0.44704
4.5	2015-12-13 15:54:00		2015-12-13 15:54:00	247.5	0.44704
4.5	2015-12-13 15:55:00		2015-12-13 15:55:00	247.5	0.44704
4.5	2015-12-13 15:56:00		2015-12-13 15:56:00	247.5	0.44704
4.5	2015-12-13 15:57:00		2015-12-13 15:57:00	247.5	0.44704
4.44444	2015-12-13 15:58:00		2015-12-13 15:58:00	225	0.44704
4.44444	2015-12-13 15:59:00		2015-12-13 15:59:00	225	0.89408
4.44444	2015-12-13 16:00:00		2015-12-13 16:00:00	247.5	0.89408
4.5	2015-12-13 16:01:00		2015-12-13 16:01:00	247.5	0.89408
4.5	2015-12-13 16:02:00		2015-12-13 16:02:00	225	0.89408
4.44444	2015-12-13 16:03:00		2015-12-13 16:03:00	225	0.89408
4.5	2015-12-13 16:04:00		2015-12-13 16:04:00	247.5	0.44704
4.44444	2015-12-13 16:05:00		2015-12-13 16:05:00	247.5	0.44704
4.44444	2015-12-13 16:06:00		2015-12-13 16:06:00	247.5	0.44704
4.44444	2015-12-13 16:07:00		2015-12-13 16:07:00	247.5	0.44704
4.44444	2015-12-13 16:08:00		2015-12-13 16:08:00	247.5	0.44704
4.38889	2015-12-13 16:09:00		2015-12-13 16:09:00	247.5	0.44704
4.38889	2015-12-13 16:10:00		2015-12-13 16:10:00	247.5	0.44704
4.38889	2015-12-13 16:11:00		2015-12-13 16:11:00	247.5	0.44704
4.38889	2015-12-13 16:12:00		2015-12-13 16:12:00	247.5	0.44704
4.33333	2015-12-13 16:13:00		2015-12-13 16:13:00	247.5	0.44704
4.33333	2015-12-13 16:14:00		2015-12-13 16:14:00	247.5	0.44704
4.33333	2015-12-13 16:15:00		2015-12-13 16:15:00	247.5	0.44704
4.33333	2015-12-13 16:16:00		2015-12-13 16:16:00	247.5	0.44704
4.38889	2015-12-13 16:17:00		2015-12-13 16:17:00	247.5	0.44704
4.33333	2015-12-13 16:18:00		2015-12-13 16:18:00	247.5	0.44704
4.33333	2015-12-13 16:19:00		2015-12-13 16:19:00	247.5	0.44704
4.33333	2015-12-13 16:20:00		2015-12-13 16:20:00	247.5	0.44704
4.33333	2015-12-13 16:21:00		2015-12-13 16:21:00	247.5	0.44704
4.27778	2015-12-13 16:22:00		2015-12-13 16:22:00	247.5	0.44704
4.27778	2015-12-13 16:23:00		2015-12-13 16:23:00	247.5	0.44704
4.22222	2015-12-13 16:24:00		2015-12-13 16:24:00	247.5	0.44704
4.22222	2015-12-13 16:25:00		2015-12-13 16:25:00	247.5	0.44704
4.16667	2015-12-13 16:26:00		2015-12-13 16:26:00	247.5	0.44704
4.16667	2015-12-13 16:27:00		2015-12-13 16:27:00	247.5	0.44704
4.16667	2015-12-13 16:28:00		2015-12-13 16:28:00	247.5	0.44704
4.11111	2015-12-13 16:29:00		2015-12-13 16:29:00	247.5	0.44704
4.05556	2015-12-13 16:30:00		2015-12-13 16:30:00	225	0.44704
4.05556	2015-12-13 16:31:00		2015-12-13 16:31:00	202.5	0.44704
4.05556	2015-12-13 16:32:00		2015-12-13 16:32:00	202.5	0.44704
4.05556	2015-12-13 16:33:00		2015-12-13 16:33:00	202.5	0.44704
4.05556	2015-12-13 16:34:00		2015-12-13 16:34:00	202.5	0.44704
4	2015-12-13 16:35:00		2015-12-13 16:35:00	202.5	0.44704
4	2015-12-13 16:36:00		2015-12-13 16:36:00	202.5	0.44704
4	2015-12-13 16:37:00		2015-12-13 16:37:00	202.5	0.44704
4	2015-12-13 16:38:00		2015-12-13 16:38:00	202.5	0.44704
4	2015-12-13 16:39:00		2015-12-13 16:39:00	202.5	0.89408
4	2015-12-13 16:40:00		2015-12-13 16:40:00	225	0.44704
4	2015-12-13 16:41:00		2015-12-13 16:41:00	225	0.44704
4	2015-12-13 16:42:00		2015-12-13 16:42:00	225	0.44704
4	2015-12-13 16:43:00		2015-12-13 16:43:00	225	0.44704
4	2015-12-13 16:44:00		2015-12-13 16:44:00	225	0.44704
4	2015-12-13 16:45:00		2015-12-13 16:45:00	225	0.44704
3.94444	2015-12-13 16:46:00		2015-12-13 16:46:00	202.5	0.44704
3.94444	2015-12-13 16:47:00		2015-12-13 16:47:00	202.5	0.44704
3.94444	2015-12-13 16:48:00		2015-12-13 16:48:00	202.5	0.89408
3.94444	2015-12-13 16:49:00		2015-12-13 16:49:00	202.5	0.89408
3.88889	2015-12-13 16:50:00		2015-12-13 16:50:00	202.5	0.89408
3.83333	2015-12-13 16:51:00		2015-12-13 16:51:00	202.5	0.44704
3.83333	2015-12-13 16:52:00		2015-12-13 16:52:00	202.5	0.44704
3.83333	2015-12-13 16:53:00		2015-12-13 16:53:00	202.5	0.44704
3.77778	2015-12-13 16:54:00		2015-12-13 16:54:00	202.5	0.44704
3.77778	2015-12-13 16:55:00		2015-12-13 16:55:00	202.5	0.44704
3.77778	2015-12-13 16:56:00		2015-12-13 16:56:00	202.5	0.44704
3.77778	2015-12-13 16:57:00		2015-12-13 16:57:00	202.5	0.44704
3.72222	2015-12-13 16:58:00		2015-12-13 16:58:00	225	0.44704
3.72222	2015-12-13 16:59:00		2015-12-13 16:59:00	225	0.44704
3.72222	2015-12-13 17:00:00		2015-12-13 17:00:00	225	0.44704
3.72222	2015-12-13 17:01:00		2015-12-13 17:01:00	225	0.44704
3.72222	2015-12-13 17:02:00		2015-12-13 17:02:00	225	0.44704
3.72222	2015-12-13 17:03:00		2015-12-13 17:03:00	225	0.44704
3.66667	2015-12-13 17:04:00		2015-12-13 17:04:00	225	0.44704
3.66667	2015-12-13 17:05:00		2015-12-13 17:05:00	225	0.44704
3.66667	2015-12-13 17:06:00		2015-12-13 17:06:00	247.5	0.44704
3.66667	2015-12-13 17:07:00		2015-12-13 17:07:00	225	0.44704
3.66667	2015-12-13 17:08:00		2015-12-13 17:08:00	225	0.44704
3.61111	2015-12-13 17:09:00		2015-12-13 17:09:00	225	0.89408
3.61111	2015-12-13 17:10:00		2015-12-13 17:10:00	225	0.44704
3.61111	2015-12-13 17:11:00		2015-12-13 17:11:00	225	0.44704
3.61111	2015-12-13 17:12:00		2015-12-13 17:12:00	247.5	0.44704
3.61111	2015-12-13 17:13:00		2015-12-13 17:13:00	225	0.44704
3.61111	2015-12-13 17:14:00		2015-12-13 17:14:00	225	0.44704
3.61111	2015-12-13 17:15:00		2015-12-13 17:15:00	225	0.44704
3.61111	2015-12-13 17:16:00		2015-12-13 17:16:00	225	0.44704
3.61111	2015-12-13 17:17:00		2015-12-13 17:17:00	225	0.44704
3.61111	2015-12-13 17:18:00		2015-12-13 17:18:00	225	0.44704
3.55556	2015-12-13 17:19:00		2015-12-13 17:19:00	225	0.44704
3.55556	2015-12-13 17:20:00		2015-12-13 17:20:00	225	0.44704
3.55556	2015-12-13 17:21:00		2015-12-13 17:21:00	225	0.44704
3.55556	2015-12-13 17:22:00		2015-12-13 17:22:00	202.5	0.44704
3.5	2015-12-13 17:23:00		2015-12-13 17:23:00	202.5	0.44704
3.5	2015-12-13 17:24:00		2015-12-13 17:24:00	180	0.44704
3.5	2015-12-13 17:25:00		2015-12-13 17:25:00	180	0.44704
3.5	2015-12-13 17:26:00		2015-12-13 17:26:00	180	0.44704
3.5	2015-12-13 17:27:00		2015-12-13 17:27:00		0
3.55556	2015-12-13 17:28:00		2015-12-13 17:28:00	180	0
3.55556	2015-12-13 17:29:00		2015-12-13 17:29:00	180	0
3.55556	2015-12-13 17:30:00		2015-12-13 17:30:00		0
3.55556	2015-12-13 17:31:00		2015-12-13 17:31:00		0
3.55556	2015-12-13 17:32:00		2015-12-13 17:32:00		0
3.55556	2015-12-13 17:33:00		2015-12-13 17:33:00	180	0
3.55556	2015-12-13 17:34:00		2015-12-13 17:34:00	180	0
3.55556	2015-12-13 17:35:00		2015-12-13 17:35:00	180	0.44704
3.55556	2015-12-13 17:36:00		2015-12-13 17:36:00	180	0.44704
3.55556	2015-12-13 17:37:00		2015-12-13 17:37:00	180	0.44704
3.55556	2015-12-13 17:38:00		2015-12-13 17:38:00	180	0.44704
3.5	2015-12-13 17:39:00		2015-12-13 17:39:00	180	0
3.5	2015-12-13 17:40:00		2015-12-13 17:40:00	180	0
3.5	2015-12-13 17:41:00		2015-12-13 17:41:00	180	0
3.5	2015-12-13 17:42:00		2015-12-13 17:42:00		0
3.5	2015-12-13 17:43:00		2015-12-13 17:43:00		0
3.44444	2015-12-13 17:44:00		2015-12-13 17:44:00	157.5	0.44704
3.44444	2015-12-13 17:45:00		2015-12-13 17:45:00	135	0
3.44444	2015-12-13 17:46:00		2015-12-13 17:46:00	135	0
3.44444	2015-12-13 17:47:00		2015-12-13 17:47:00	112.5	0.44704
3.44444	2015-12-13 17:48:00		2015-12-13 17:48:00	112.5	0
3.44444	2015-12-13 17:49:00		2015-12-13 17:49:00	135	0
3.44444	2015-12-13 17:50:00		2015-12-13 17:50:00	135	0
3.44444	2015-12-13 17:51:00		2015-12-13 17:51:00	135	0
3.44444	2015-12-13 17:52:00		2015-12-13 17:52:00	157.5	0.44704
3.44444	2015-12-13 17:53:00		2015-12-13 17:53:00	157.5	0.44704
3.44444	2015-12-13 17:54:00		2015-12-13 17:54:00	157.5	0.44704
3.44444	2015-12-13 17:55:00		2015-12-13 17:55:00	157.5	0
3.44444	2015-12-13 17:56:00		2015-12-13 17:56:00	157.5	0
3.44444	2015-12-13 17:57:00		2015-12-13 17:57:00	157.5	0
3.44444	2015-12-13 17:58:00		2015-12-13 17:58:00	157.5	0
3.44444	2015-12-13 17:59:00		2015-12-13 17:59:00	157.5	0
3.44444	2015-12-13 18:00:00		2015-12-13 18:00:00	157.5	0
3.44444	2015-12-13 18:01:00		2015-12-13 18:01:00	157.5	0
3.44444	2015-12-13 18:02:00		2015-12-13 18:02:00	157.5	0
3.44444	2015-12-13 18:03:00		2015-12-13 18:03:00	157.5	0
3.44444	2015-12-13 18:04:00		2015-12-13 18:04:00	157.5	0
3.44444	2015-12-13 18:05:00		2015-12-13 18:05:00		0
3.44444	2015-12-13 18:06:00		2015-12-13 18:06:00		0
3.38889	2015-12-13 18:07:00		2015-12-13 18:07:00		0
3.38889	2015-12-13 18:08:00		2015-12-13 18:08:00	157.5	0
3.38889	2015-12-13 18:09:00		2015-12-13 18:09:00	157.5	0
3.38889	2015-12-13 18:10:00		2015-12-13 18:10:00	157.5	0
3.33333	2015-12-13 18:11:00		2015-12-13 18:11:00	157.5	0
3.33333	2015-12-13 18:12:00		2015-12-13 18:12:00		0
3.33333	2015-12-13 18:13:00		2015-12-13 18:13:00		0
3.33333	2015-12-13 18:14:00		2015-12-13 18:14:00		0
3.27778	2015-12-13 18:15:00		2015-12-13 18:15:00		0
3.27778	2015-12-13 18:16:00		2015-12-13 18:16:00		0
3.22222	2015-12-13 18:17:00		2015-12-13 18:17:00		0
3.22222	2015-12-13 18:18:00		2015-12-13 18:18:00	157.5	0
3.22222	2015-12-13 18:19:00		2015-12-13 18:19:00	157.5	0
3.22222	2015-12-13 18:20:00		2015-12-13 18:20:00	157.5	0
3.16667	2015-12-13 18:21:00		2015-12-13 18:21:00	157.5	0
3.16667	2015-12-13 18:22:00		2015-12-13 18:22:00	157.5	0
3.16667	2015-12-13 18:23:00		2015-12-13 18:23:00	157.5	0
3.16667	2015-12-13 18:24:00		2015-12-13 18:24:00	157.5	0.44704
3.11111	2015-12-13 18:25:00		2015-12-13 18:25:00	157.5	0
3.11111	2015-12-13 18:26:00		2015-12-13 18:26:00	157.5	0
3.11111	2015-12-13 18:27:00		2015-12-13 18:27:00		0
3.05556	2015-12-13 18:28:00		2015-12-13 18:28:00		0
3.05556	2015-12-13 18:29:00		2015-12-13 18:29:00		0
3.05556	2015-12-13 18:30:00		2015-12-13 18:30:00		0
3.05556	2015-12-13 18:31:00		2015-12-13 18:31:00		0
3	2015-12-13 18:32:00		2015-12-13 18:32:00		0
3	2015-12-13 18:33:00		2015-12-13 18:33:00		0
3	2015-12-13 18:34:00		2015-12-13 18:34:00		0
2.94444	2015-12-13 18:35:00		2015-12-13 18:35:00		0
2.94444	2015-12-13 18:36:00		2015-12-13 18:36:00	157.5	0
2.94444	2015-12-13 18:37:00		2015-12-13 18:37:00	157.5	0.44704
2.94444	2015-12-13 18:38:00		2015-12-13 18:38:00	157.5	0.44704
2.94444	2015-12-13 18:39:00		2015-12-13 18:39:00	157.5	0
2.94444	2015-12-13 18:40:00		2015-12-13 18:40:00	157.5	0
2.94444	2015-12-13 18:41:00		2015-12-13 18:41:00	157.5	0
2.88889	2015-12-13 18:42:00		2015-12-13 18:42:00	157.5	0
2.88889	2015-12-13 18:43:00		2015-12-13 18:43:00	157.5	0
2.88889	2015-12-13 18:44:00		2015-12-13 18:44:00		0
2.88889	2015-12-13 18:45:00		2015-12-13 18:45:00	157.5	0
2.88889	2015-12-13 18:46:00		2015-12-13 18:46:00	157.5	0
2.88889	2015-12-13 18:47:00		2015-12-13 18:47:00		0
2.88889	2015-12-13 18:48:00		2015-12-13 18:48:00		0
2.88889	2015-12-13 18:49:00		2015-12-13 18:49:00		0
2.88889	2015-12-13 18:50:00		2015-12-13 18:50:00		0
2.88889	2015-12-13 18:51:00		2015-12-13 18:51:00	157.5	0
2.88889	2015-12-13 18:52:00		2015-12-13 18:52:00	157.5	0
2.88889	2015-12-13 18:53:00		2015-12-13 18:53:00	157.5	0
2.83333	2015-12-13 18:54:00		2015-12-13 18:54:00	157.5	0
2.83333	2015-12-13 18:55:00		2015-12-13 18:55:00	157.5	0
2.83333	2015-12-13 18:56:00		2015-12-13 18:56:00	157.5	0
2.83333	2015-12-13 18:57:00		2015-12-13 18:57:00		0
2.83333	2015-12-13 18:58:00		2015-12-13 18:58:00		0
2.83333	2015-12-13 18:59:00		2015-12-13 18:59:00		0
2.83333	2015-12-13 19:00:00		2015-12-13 19:00:00		0
2.77778	2015-12-13 19:01:00		2015-12-13 19:01:00	157.5	0
2.77778	2015-12-13 19:02:00		2015-12-13 19:02:00	157.5	0
2.77778	2015-12-13 19:03:00		2015-12-13 19:03:00		0
2.77778	2015-12-13 19:04:00		2015-12-13 19:04:00		0
2.72222	2015-12-13 19:05:00		2015-12-13 19:05:00	157.5	0
2.72222	2015-12-13 19:06:00		2015-12-13 19:06:00	157.5	0.44704
2.66667	2015-12-13 19:07:00		2015-12-13 19:07:00	157.5	0.44704
2.66667	2015-12-13 19:08:00		2015-12-13 19:08:00	157.5	0.44704
2.66667	2015-12-13 19:09:00		2015-12-13 19:09:00	157.5	0.44704
2.66667	2015-12-13 19:10:00		2015-12-13 19:10:00	180	0.44704
2.61111	2015-12-13 19:11:00		2015-12-13 19:11:00	180	0.44704
2.61111	2015-12-13 19:12:00		2015-12-13 19:12:00	180	0.44704
2.55556	2015-12-13 19:13:00		2015-12-13 19:13:00	180	0.44704
2.55556	2015-12-13 19:14:00		2015-12-13 19:14:00	180	0
2.5	2015-12-13 19:15:00		2015-12-13 19:15:00	180	0
2.5	2015-12-13 19:16:00		2015-12-13 19:16:00	180	0
2.5	2015-12-13 19:17:00		2015-12-13 19:17:00	180	0
2.5	2015-12-13 19:18:00		2015-12-13 19:18:00		0
2.5	2015-12-13 19:19:00		2015-12-13 19:19:00	180	0
2.44444	2015-12-13 19:20:00		2015-12-13 19:20:00	180	0
2.44444	2015-12-13 19:21:00		2015-12-13 19:21:00	180	0
2.44444	2015-12-13 19:22:00		2015-12-13 19:22:00	180	0
2.44444	2015-12-13 19:23:00		2015-12-13 19:23:00	180	0.44704
2.44444	2015-12-13 19:24:00		2015-12-13 19:24:00	180	0
2.38889	2015-12-13 19:25:00		2015-12-13 19:25:00	180	0
2.38889	2015-12-13 19:26:00		2015-12-13 19:26:00	180	0.44704
2.33333	2015-12-13 19:27:00		2015-12-13 19:27:00	180	0
2.33333	2015-12-13 19:28:00		2015-12-13 19:28:00	180	0
2.33333	2015-12-13 19:29:00		2015-12-13 19:29:00	180	0
2.33333	2015-12-13 19:30:00		2015-12-13 19:30:00	180	0
2.33333	2015-12-13 19:31:00		2015-12-13 19:31:00	180	0
2.33333	2015-12-13 19:32:00		2015-12-13 19:32:00	180	0
2.33333	2015-12-13 19:33:00		2015-12-13 19:33:00	180	0
2.33333	2015-12-13 19:34:00		2015-12-13 19:34:00	180	0.44704
2.33333	2015-12-13 19:35:00		2015-12-13 19:35:00	180	0
2.33333	2015-12-13 19:36:00		2015-12-13 19:36:00	180	0
2.33333	2015-12-13 19:37:00		2015-12-13 19:37:00		0
2.33333	2015-12-13 19:38:00		2015-12-13 19:38:00		0
2.33333	2015-12-13 19:39:00		2015-12-13 19:39:00		0
2.33333	2015-12-13 19:40:00		2015-12-13 19:40:00		0
2.27778	2015-12-13 19:41:00		2015-12-13 19:41:00	180	0
2.27778	2015-12-13 19:42:00		2015-12-13 19:42:00	180	0
2.27778	2015-12-13 19:43:00		2015-12-13 19:43:00	180	0
2.27778	2015-12-13 19:44:00		2015-12-13 19:44:00	180	0
2.27778	2015-12-13 19:45:00		2015-12-13 19:45:00	180	0
2.22222	2015-12-13 19:46:00		2015-12-13 19:46:00	180	0
2.22222	2015-12-13 19:47:00		2015-12-13 19:47:00	180	0
2.22222	2015-12-13 19:48:00		2015-12-13 19:48:00	180	0
2.22222	2015-12-13 19:49:00		2015-12-13 19:49:00	180	0
2.16667	2015-12-13 19:50:00		2015-12-13 19:50:00	180	0
2.16667	2015-12-13 19:51:00		2015-12-13 19:51:00	180	0
2.16667	2015-12-13 19:52:00		2015-12-13 19:52:00	180	0
2.16667	2015-12-13 19:53:00		2015-12-13 19:53:00	180	0
2.16667	2015-12-13 19:54:00		2015-12-13 19:54:00	180	0
2.11111	2015-12-13 19:55:00		2015-12-13 19:55:00	180	0.44704
2.11111	2015-12-13 19:56:00		2015-12-13 19:56:00	180	0
2.11111	2015-12-13 19:57:00		2015-12-13 19:57:00	180	0
2.11111	2015-12-13 19:58:00		2015-12-13 19:58:00	180	0
2.11111	2015-12-13 19:59:00		2015-12-13 19:59:00	180	0
2.11111	2015-12-13 20:00:00		2015-12-13 20:00:00	157.5	0
2.11111	2015-12-13 20:01:00		2015-12-13 20:01:00	157.5	0.44704
2.05556	2015-12-13 20:02:00		2015-12-13 20:02:00	180	0.44704
2.11111	2015-12-13 20:03:00		2015-12-13 20:03:00	180	0.44704
2.05556	2015-12-13 20:04:00		2015-12-13 20:04:00	180	0.44704
2.05556	2015-12-13 20:05:00		2015-12-13 20:05:00	180	0.44704
2.05556	2015-12-13 20:06:00		2015-12-13 20:06:00	202.5	0.89408
2.05556	2015-12-13 20:07:00		2015-12-13 20:07:00	202.5	0.89408
2.05556	2015-12-13 20:08:00		2015-12-13 20:08:00	202.5	0.44704
2.05556	2015-12-13 20:09:00		2015-12-13 20:09:00	202.5	0.44704
2	2015-12-13 20:10:00		2015-12-13 20:10:00	202.5	0.44704
2	2015-12-13 20:11:00		2015-12-13 20:11:00	180	0.44704
2	2015-12-13 20:12:00		2015-12-13 20:12:00	180	0.44704
2	2015-12-13 20:13:00		2015-12-13 20:13:00	180	0.44704
2	2015-12-13 20:14:00		2015-12-13 20:14:00	180	0.44704
1.94444	2015-12-13 20:15:00		2015-12-13 20:15:00	180	0.44704
1.94444	2015-12-13 20:16:00		2015-12-13 20:16:00	180	0.44704
1.94444	2015-12-13 20:17:00		2015-12-13 20:17:00	180	0
1.94444	2015-12-13 20:18:00		2015-12-13 20:18:00	180	0.44704
1.88889	2015-12-13 20:19:00		2015-12-13 20:19:00	180	0.44704
1.88889	2015-12-13 20:20:00		2015-12-13 20:20:00	180	0.44704
1.88889	2015-12-13 20:21:00		2015-12-13 20:21:00	180	0.44704
1.88889	2015-12-13 20:22:00		2015-12-13 20:22:00	180	0.44704
1.88889	2015-12-13 20:23:00		2015-12-13 20:23:00	180	0.44704
1.88889	2015-12-13 20:24:00		2015-12-13 20:24:00	180	0.44704
1.83333	2015-12-13 20:25:00		2015-12-13 20:25:00	180	0.44704
1.83333	2015-12-13 20:26:00		2015-12-13 20:26:00	202.5	0.44704
1.83333	2015-12-13 20:27:00		2015-12-13 20:27:00	202.5	0.44704
1.83333	2015-12-13 20:28:00		2015-12-13 20:28:00	202.5	0.44704
1.88889	2015-12-13 20:29:00		2015-12-13 20:29:00	202.5	0.44704
1.88889	2015-12-13 20:30:00		2015-12-13 20:30:00	225	0.44704
1.88889	2015-12-13 20:31:00		2015-12-13 20:31:00	225	0.44704
1.94444	2015-12-13 20:32:00		2015-12-13 20:32:00	247.5	0.44704
1.94444	2015-12-13 20:33:00		2015-12-13 20:33:00	225	0.44704
1.94444	2015-12-13 20:34:00		2015-12-13 20:34:00	225	0.89408
2	2015-12-13 20:35:00		2015-12-13 20:35:00	225	0.89408
2	2015-12-13 20:36:00		2015-12-13 20:36:00	225	0.44704
2	2015-12-13 20:37:00		2015-12-13 20:37:00	225	0.44704
2	2015-12-13 20:38:00		2015-12-13 20:38:00	225	0.44704
2	2015-12-13 20:39:00		2015-12-13 20:39:00	225	0.44704
2	2015-12-13 20:40:00		2015-12-13 20:40:00	225	0.44704
2	2015-12-13 20:41:00		2015-12-13 20:41:00	225	0.44704
1.94444	2015-12-13 20:42:00		2015-12-13 20:42:00	202.5	0.44704
1.94444	2015-12-13 20:43:00		2015-12-13 20:43:00	180	0.44704
1.88889	2015-12-13 20:44:00		2015-12-13 20:44:00	180	0
1.88889	2015-12-13 20:45:00		2015-12-13 20:45:00	180	0
1.88889	2015-12-13 20:46:00		2015-12-13 20:46:00	180	0.44704
1.83333	2015-12-13 20:47:00		2015-12-13 20:47:00	180	0.44704
1.83333	2015-12-13 20:48:00		2015-12-13 20:48:00	180	0
1.83333	2015-12-13 20:49:00		2015-12-13 20:49:00		0
1.83333	2015-12-13 20:50:00		2015-12-13 20:50:00	180	0.44704
1.83333	2015-12-13 20:51:00		2015-12-13 20:51:00	202.5	0.44704
1.83333	2015-12-13 20:52:00		2015-12-13 20:52:00	202.5	0.44704
1.77778	2015-12-13 20:53:00		2015-12-13 20:53:00	202.5	0.44704
1.77778	2015-12-13 20:54:00		2015-12-13 20:54:00	202.5	0.44704
1.72222	2015-12-13 20:55:00		2015-12-13 20:55:00	202.5	0.44704
1.72222	2015-12-13 20:56:00		2015-12-13 20:56:00	202.5	0
1.72222	2015-12-13 20:57:00		2015-12-13 20:57:00		0
1.72222	2015-12-13 20:58:00		2015-12-13 20:58:00		0
1.72222	2015-12-13 20:59:00		2015-12-13 20:59:00		0
1.66667	2015-12-13 21:00:00		2015-12-13 21:00:00		0
1.66667	2015-12-13 21:01:00		2015-12-13 21:01:00	202.5	0
1.66667	2015-12-13 21:02:00		2015-12-13 21:02:00	202.5	0
1.66667	2015-12-13 21:03:00		2015-12-13 21:03:00	180	0
1.66667	2015-12-13 21:04:00		2015-12-13 21:04:00	180	0
1.66667	2015-12-13 21:05:00		2015-12-13 21:05:00	180	0
1.66667	2015-12-13 21:06:00		2015-12-13 21:06:00	180	0
1.66667	2015-12-13 21:07:00		2015-12-13 21:07:00	180	0
1.66667	2015-12-13 21:08:00		2015-12-13 21:08:00	180	0
1.61111	2015-12-13 21:09:00		2015-12-13 21:09:00	180	0
1.61111	2015-12-13 21:10:00		2015-12-13 21:10:00	180	0
1.61111	2015-12-13 21:11:00		2015-12-13 21:11:00	180	0
1.61111	2015-12-13 21:12:00		2015-12-13 21:12:00	180	0
1.61111	2015-12-13 21:13:00		2015-12-13 21:13:00	180	0
1.61111	2015-12-13 21:14:00		2015-12-13 21:14:00		0
1.61111	2015-12-13 21:15:00		2015-12-13 21:15:00		0
1.61111	2015-12-13 21:16:00		2015-12-13 21:16:00		0
1.61111	2015-12-13 21:17:00		2015-12-13 21:17:00		0
1.61111	2015-12-13 21:18:00		2015-12-13 21:18:00		0
1.61111	2015-12-13 21:19:00		2015-12-13 21:19:00	180	0
1.61111	2015-12-13 21:20:00		2015-12-13 21:20:00	180	0
1.61111	2015-12-13 21:21:00		2015-12-13 21:21:00	180	0
1.61111	2015-12-13 21:22:00		2015-12-13 21:22:00	180	0.44704
1.61111	2015-12-13 21:23:00		2015-12-13 21:23:00	180	0
1.61111	2015-12-13 21:24:00		2015-12-13 21:24:00	180	0
1.61111	2015-12-13 21:25:00		2015-12-13 21:25:00	180	0
1.61111	2015-12-13 21:26:00		2015-12-13 21:26:00	180	0
1.61111	2015-12-13 21:27:00		2015-12-13 21:27:00		0
1.61111	2015-12-13 21:28:00		2015-12-13 21:28:00		0
1.55556	2015-12-13 21:29:00		2015-12-13 21:29:00		0
1.55556	2015-12-13 21:30:00		2015-12-13 21:30:00		0
1.55556	2015-12-13 21:31:00		2015-12-13 21:31:00		0
1.55556	2015-12-13 21:32:00		2015-12-13 21:32:00	180	0
1.55556	2015-12-13 21:33:00		2015-12-13 21:33:00	180	0
1.55556	2015-12-13 21:34:00		2015-12-13 21:34:00	180	0
1.55556	2015-12-13 21:35:00		2015-12-13 21:35:00	180	0.44704
1.5	2015-12-13 21:36:00		2015-12-13 21:36:00	180	0.44704
1.5	2015-12-13 21:37:00		2015-12-13 21:37:00	180	0
1.5	2015-12-13 21:38:00		2015-12-13 21:38:00	180	0
1.5	2015-12-13 21:39:00		2015-12-13 21:39:00	180	0
1.44444	2015-12-13 21:40:00		2015-12-13 21:40:00		0
1.44444	2015-12-13 21:41:00		2015-12-13 21:41:00		0
1.38889	2015-12-13 21:42:00		2015-12-13 21:42:00		0
1.38889	2015-12-13 21:43:00		2015-12-13 21:43:00		0
1.33333	2015-12-13 21:44:00		2015-12-13 21:44:00		0
1.33333	2015-12-13 21:45:00		2015-12-13 21:45:00	180	0
1.33333	2015-12-13 21:46:00		2015-12-13 21:46:00	180	0
1.27778	2015-12-13 21:47:00		2015-12-13 21:47:00	180	0
1.27778	2015-12-13 21:48:00		2015-12-13 21:48:00	180	0
1.27778	2015-12-13 21:49:00		2015-12-13 21:49:00		0
1.27778	2015-12-13 21:50:00		2015-12-13 21:50:00		0
1.22222	2015-12-13 21:51:00		2015-12-13 21:51:00	157.5	0
1.22222	2015-12-13 21:52:00		2015-12-13 21:52:00	157.5	0
1.22222	2015-12-13 21:53:00		2015-12-13 21:53:00		0
1.22222	2015-12-13 21:54:00		2015-12-13 21:54:00	135	0
1.16667	2015-12-13 21:55:00		2015-12-13 21:55:00	135	0
1.16667	2015-12-13 21:56:00		2015-12-13 21:56:00		0
1.16667	2015-12-13 21:57:00		2015-12-13 21:57:00	135	0
1.16667	2015-12-13 21:58:00		2015-12-13 21:58:00	135	0
1.11111	2015-12-13 21:59:00		2015-12-13 21:59:00		0
1.11111	2015-12-13 22:00:00		2015-12-13 22:00:00		0
1.11111	2015-12-13 22:01:00		2015-12-13 22:01:00		0
1.05556	2015-12-13 22:02:00		2015-12-13 22:02:00		0
1.05556	2015-12-13 22:03:00		2015-12-13 22:03:00	135	0
1.05556	2015-12-13 22:04:00		2015-12-13 22:04:00	135	0
1.05556	2015-12-13 22:05:00		2015-12-13 22:05:00	135	0
1.05556	2015-12-13 22:06:00		2015-12-13 22:06:00		0
1	2015-12-13 22:07:00		2015-12-13 22:07:00		0
1	2015-12-13 22:08:00		2015-12-13 22:08:00		0
1	2015-12-13 22:09:00		2015-12-13 22:09:00	135	0
1	2015-12-13 22:10:00		2015-12-13 22:10:00	135	0
1	2015-12-13 22:11:00		2015-12-13 22:11:00	135	0.44704
1	2015-12-13 22:12:00		2015-12-13 22:12:00	135	0
1	2015-12-13 22:13:00		2015-12-13 22:13:00	157.5	0.44704
1	2015-12-13 22:14:00		2015-12-13 22:14:00	157.5	0
1	2015-12-13 22:15:00		2015-12-13 22:15:00	157.5	0
1	2015-12-13 22:16:00		2015-12-13 22:16:00	157.5	0
1	2015-12-13 22:17:00		2015-12-13 22:17:00	157.5	0
1	2015-12-13 22:18:00		2015-12-13 22:18:00		0
1	2015-12-13 22:19:00		2015-12-13 22:19:00		0
0.944444	2015-12-13 22:20:00		2015-12-13 22:20:00		0
0.944444	2015-12-13 22:21:00		2015-12-13 22:21:00	157.5	0
0.944444	2015-12-13 22:22:00		2015-12-13 22:22:00	157.5	0
0.944444	2015-12-13 22:23:00		2015-12-13 22:23:00	157.5	0
0.944444	2015-12-13 22:24:00		2015-12-13 22:24:00	157.5	0.44704
0.944444	2015-12-13 22:25:00		2015-12-13 22:25:00	157.5	0
0.944444	2015-12-13 22:26:00		2015-12-13 22:26:00	157.5	0
0.944444	2015-12-13 22:27:00		2015-12-13 22:27:00	157.5	0.44704
0.944444	2015-12-13 22:28:00		2015-12-13 22:28:00	157.5	0.44704
0.944444	2015-12-13 22:29:00		2015-12-13 22:29:00	157.5	0.44704
0.944444	2015-12-13 22:30:00		2015-12-13 22:30:00	157.5	0
0.944444	2015-12-13 22:31:00		2015-12-13 22:31:00		0
0.944444	2015-12-13 22:32:00		2015-12-13 22:32:00	157.5	0
0.944444	2015-12-13 22:33:00		2015-12-13 22:33:00	157.5	0
0.944444	2015-12-13 22:34:00		2015-12-13 22:34:00	157.5	0
0.944444	2015-12-13 22:35:00		2015-12-13 22:35:00	157.5	0.44704
0.944444	2015-12-13 22:36:00		2015-12-13 22:36:00	157.5	0
0.944444	2015-12-13 22:37:00		2015-12-13 22:37:00	157.5	0.44704
0.944444	2015-12-13 22:38:00		2015-12-13 22:38:00	157.5	0
0.944444	2015-12-13 22:39:00		2015-12-13 22:39:00	157.5	0
0.944444	2015-12-13 22:40:00		2015-12-13 22:40:00	157.5	0
0.944444	2015-12-13 22:41:00		2015-12-13 22:41:00	157.5	0
0.944444	2015-12-13 22:42:00		2015-12-13 22:42:00	157.5	0
0.944444	2015-12-13 22:43:00		2015-12-13 22:43:00	157.5	0
0.944444	2015-12-13 22:44:00		2015-12-13 22:44:00	157.5	0
0.944444	2015-12-13 22:45:00		2015-12-13 22:45:00	180	0.44704
0.944444	2015-12-13 22:46:00		2015-12-13 22:46:00	180	0.44704
0.944444	2015-12-13 22:47:00		2015-12-13 22:47:00	180	0.44704
0.888889	2015-12-13 22:48:00		2015-12-13 22:48:00	157.5	0.44704
0.888889	2015-12-13 22:49:00		2015-12-13 22:49:00	157.5	0.44704
0.888889	2015-12-13 22:50:00		2015-12-13 22:50:00	157.5	0.44704
0.944444	2015-12-13 22:51:00		2015-12-13 22:51:00	157.5	0
0.944444	2015-12-13 22:52:00		2015-12-13 22:52:00		0
0.944444	2015-12-13 22:53:00		2015-12-13 22:53:00		0
0.944444	2015-12-13 22:54:00		2015-12-13 22:54:00		0
0.944444	2015-12-13 22:55:00		2015-12-13 22:55:00	157.5	0
0.944444	2015-12-13 22:56:00		2015-12-13 22:56:00	157.5	0.44704
0.944444	2015-12-13 22:57:00		2015-12-13 22:57:00	157.5	0
0.944444	2015-12-13 22:58:00		2015-12-13 22:58:00	180	0
1	2015-12-13 22:59:00		2015-12-13 22:59:00	180	0
0.944444	2015-12-13 23:00:00		2015-12-13 23:00:00	180	0
0.944444	2015-12-13 23:01:00		2015-12-13 23:01:00	180	0
0.944444	2015-12-13 23:02:00		2015-12-13 23:02:00	180	0
0.944444	2015-12-13 23:03:00		2015-12-13 23:03:00	180	0
0.944444	2015-12-13 23:04:00		2015-12-13 23:04:00		0
0.888889	2015-12-13 23:05:00		2015-12-13 23:05:00		0
0.888889	2015-12-13 23:06:00		2015-12-13 23:06:00		0
0.888889	2015-12-13 23:07:00		2015-12-13 23:07:00		0
0.888889	2015-12-13 23:08:00		2015-12-13 23:08:00	180	0
0.888889	2015-12-13 23:09:00		2015-12-13 23:09:00		0
0.888889	2015-12-13 23:10:00		2015-12-13 23:10:00	180	0
0.833333	2015-12-13 23:11:00		2015-12-13 23:11:00		0
0.888889	2015-12-13 23:12:00		2015-12-13 23:12:00	180	0
0.888889	2015-12-13 23:13:00		2015-12-13 23:13:00	180	0.44704
0.888889	2015-12-13 23:14:00		2015-12-13 23:14:00	202.5	0.44704
0.888889	2015-12-13 23:15:00		2015-12-13 23:15:00	225	0
0.888889	2015-12-13 23:16:00		2015-12-13 23:16:00	247.5	0
0.833333	2015-12-13 23:17:00		2015-12-13 23:17:00	247.5	0.44704
0.833333	2015-12-13 23:18:00		2015-12-13 23:18:00	247.5	0
0.833333	2015-12-13 23:19:00		2015-12-13 23:19:00	247.5	0
0.833333	2015-12-13 23:20:00		2015-12-13 23:20:00	247.5	0
0.833333	2015-12-13 23:21:00		2015-12-13 23:21:00	247.5	0
0.777778	2015-12-13 23:22:00		2015-12-13 23:22:00		0
0.777778	2015-12-13 23:23:00		2015-12-13 23:23:00		0
0.833333	2015-12-13 23:24:00		2015-12-13 23:24:00		0
0.777778	2015-12-13 23:25:00		2015-12-13 23:25:00		0
0.777778	2015-12-13 23:26:00		2015-12-13 23:26:00		0
0.777778	2015-12-13 23:27:00		2015-12-13 23:27:00	225	0
0.777778	2015-12-13 23:28:00		2015-12-13 23:28:00	225	0
0.777778	2015-12-13 23:29:00		2015-12-13 23:29:00	180	0
0.777778	2015-12-13 23:30:00		2015-12-13 23:30:00	180	0
0.777778	2015-12-13 23:31:00		2015-12-13 23:31:00	180	0
0.722222	2015-12-13 23:32:00		2015-12-13 23:32:00	180	0
0.722222	2015-12-13 23:33:00		2015-12-13 23:33:00	180	0
0.722222	2015-12-13 23:34:00		2015-12-13 23:34:00	180	0
0.722222	2015-12-13 23:35:00		2015-12-13 23:35:00	180	0
0.722222	2015-12-13 23:36:00		2015-12-13 23:36:00	180	0
0.666667	2015-12-13 23:37:00		2015-12-13 23:37:00	180	0
0.666667	2015-12-13 23:38:00		2015-12-13 23:38:00	180	0.44704
0.666667	2015-12-13 23:39:00		2015-12-13 23:39:00	180	0.44704
0.666667	2015-12-13 23:40:00		2015-12-13 23:40:00	180	0
0.666667	2015-12-13 23:41:00		2015-12-13 23:41:00	180	0
0.666667	2015-12-13 23:42:00		2015-12-13 23:42:00	180	0
0.611111	2015-12-13 23:43:00		2015-12-13 23:43:00	180	0
0.611111	2015-12-13 23:44:00		2015-12-13 23:44:00	180	0
0.611111	2015-12-13 23:45:00		2015-12-13 23:45:00		0
0.611111	2015-12-13 23:46:00		2015-12-13 23:46:00	157.5	0
0.611111	2015-12-13 23:47:00		2015-12-13 23:47:00	157.5	0
0.611111	2015-12-13 23:48:00		2015-12-13 23:48:00	157.5	0
0.611111	2015-12-13 23:49:00		2015-12-13 23:49:00	157.5	0
0.611111	2015-12-13 23:50:00		2015-12-13 23:50:00	157.5	0.44704
0.611111	2015-12-13 23:51:00		2015-12-13 23:51:00	157.5	0
0.611111	2015-12-13 23:52:00		2015-12-13 23:52:00	157.5	0.44704
0.611111	2015-12-13 23:53:00		2015-12-13 23:53:00	157.5	0.44704
0.611111	2015-12-13 23:54:00		2015-12-13 23:54:00	157.5	0
0.555556	2015-12-13 23:55:00		2015-12-13 23:55:00	135	0.44704
0.555556	2015-12-13 23:56:00		2015-12-13 23:56:00	135	0
0.611111	2015-12-13 23:57:00		2015-12-13 23:57:00	135	0
0.611111	2015-12-13 23:58:00		2015-12-13 23:58:00		0
0.611111	2015-12-13 23:59:00		2015-12-13 23:59:00	135	0
0.611111	2015-12-14		2015-12-14		0
0.555556	2015-12-14 00:01:00		2015-12-14 00:01:00	135	0
0.555556	2015-12-14 00:02:00		2015-12-14 00:02:00	135	0
0.555556	2015-12-14 00:03:00		2015-12-14 00:03:00	135	0.44704
0.555556	2015-12-14 00:04:00		2015-12-14 00:04:00	157.5	0.44704
0.555556	2015-12-14 00:05:00		2015-12-14 00:05:00	157.5	0
0.555556	2015-12-14 00:06:00		2015-12-14 00:06:00	157.5	0
0.5	2015-12-14 00:07:00		2015-12-14 00:07:00		0
0.5	2015-12-14 00:08:00		2015-12-14 00:08:00		0
0.5	2015-12-14 00:09:00		2015-12-14 00:09:00		0
0.5	2015-12-14 00:10:00		2015-12-14 00:10:00		0
0.5	2015-12-14 00:11:00		2015-12-14 00:11:00		0
0.444444	2015-12-14 00:12:00		2015-12-14 00:12:00		0
0.444444	2015-12-14 00:13:00		2015-12-14 00:13:00		0
0.444444	2015-12-14 00:14:00		2015-12-14 00:14:00		0
0.444444	2015-12-14 00:15:00		2015-12-14 00:15:00	157.5	0
0.444444	2015-12-14 00:16:00		2015-12-14 00:16:00		0
0.444444	2015-12-14 00:17:00		2015-12-14 00:17:00	157.5	0
0.388889	2015-12-14 00:18:00		2015-12-14 00:18:00	157.5	0
0.388889	2015-12-14 00:19:00		2015-12-14 00:19:00	157.5	0
0.388889	2015-12-14 00:20:00		2015-12-14 00:20:00	157.5	0
0.388889	2015-12-14 00:21:00		2015-12-14 00:21:00	157.5	0
0.388889	2015-12-14 00:22:00		2015-12-14 00:22:00		0
0.388889	2015-12-14 00:23:00		2015-12-14 00:23:00		0
0.388889	2015-12-14 00:24:00		2015-12-14 00:24:00		0
0.388889	2015-12-14 00:25:00		2015-12-14 00:25:00		0
0.388889	2015-12-14 00:26:00		2015-12-14 00:26:00		0
0.333333	2015-12-14 00:27:00		2015-12-14 00:27:00		0
0.333333	2015-12-14 00:28:00		2015-12-14 00:28:00	157.5	0
0.333333	2015-12-14 00:29:00		2015-12-14 00:29:00	157.5	0
0.333333	2015-12-14 00:30:00		2015-12-14 00:30:00	157.5	0
0.333333	2015-12-14 00:31:00		2015-12-14 00:31:00		0
0.333333	2015-12-14 00:32:00		2015-12-14 00:32:00		0
0.333333	2015-12-14 00:33:00		2015-12-14 00:33:00		0
0.277778	2015-12-14 00:34:00		2015-12-14 00:34:00		0
0.277778	2015-12-14 00:35:00		2015-12-14 00:35:00		0
0.277778	2015-12-14 00:36:00		2015-12-14 00:36:00	157.5	0
0.277778	2015-12-14 00:37:00		2015-12-14 00:37:00	157.5	0
0.277778	2015-12-14 00:38:00		2015-12-14 00:38:00	157.5	0
0.277778	2015-12-14 00:39:00		2015-12-14 00:39:00	157.5	0
0.277778	2015-12-14 00:40:00		2015-12-14 00:40:00	157.5	0
0.277778	2015-12-14 00:41:00		2015-12-14 00:41:00	157.5	0
0.277778	2015-12-14 00:42:00		2015-12-14 00:42:00	157.5	0
0.277778	2015-12-14 00:43:00		2015-12-14 00:43:00	157.5	0
0.222222	2015-12-14 00:44:00		2015-12-14 00:44:00	157.5	0
0.277778	2015-12-14 00:45:00		2015-12-14 00:45:00	157.5	0
0.222222	2015-12-14 00:46:00		2015-12-14 00:46:00	157.5	0
0.222222	2015-12-14 00:47:00		2015-12-14 00:47:00	157.5	0
0.222222	2015-12-14 00:48:00		2015-12-14 00:48:00	157.5	0
0.222222	2015-12-14 00:49:00		2015-12-14 00:49:00	157.5	0
0.222222	2015-12-14 00:50:00		2015-12-14 00:50:00	157.5	0
0.222222	2015-12-14 00:51:00		2015-12-14 00:51:00		0
0.222222	2015-12-14 00:52:00		2015-12-14 00:52:00		0
0.166667	2015-12-14 00:53:00		2015-12-14 00:53:00	157.5	0
0.166667	2015-12-14 00:54:00		2015-12-14 00:54:00	157.5	0
0.166667	2015-12-14 00:55:00		2015-12-14 00:55:00	157.5	0
0.166667	2015-12-14 00:56:00		2015-12-14 00:56:00	157.5	0
0.166667	2015-12-14 00:57:00		2015-12-14 00:57:00	157.5	0.44704
0.166667	2015-12-14 00:58:00		2015-12-14 00:58:00	157.5	0
0.111111	2015-12-14 00:59:00		2015-12-14 00:59:00	157.5	0
0.111111	2015-12-14 01:00:00		2015-12-14 01:00:00	157.5	0
0.111111	2015-12-14 01:01:00		2015-12-14 01:01:00	157.5	0
0.111111	2015-12-14 01:02:00		2015-12-14 01:02:00	157.5	0
0.0555556	2015-12-14 01:03:00		2015-12-14 01:03:00	157.5	0
0.0555556	2015-12-14 01:04:00		2015-12-14 01:04:00		0
0.0555556	2015-12-14 01:05:00		2015-12-14 01:05:00		0
0	2015-12-14 01:06:00		2015-12-14 01:06:00	157.5	0
0	2015-12-14 01:07:00		2015-12-14 01:07:00		0
0	2015-12-14 01:08:00		2015-12-14 01:08:00		0
0	2015-12-14 01:09:00		2015-12-14 01:09:00	157.5	0
0	2015-12-14 01:10:00		2015-12-14 01:10:00	180	0.44704
-0.0555556	2015-12-14 01:11:00		2015-12-14 01:11:00	180	0.44704
-0.0555556	2015-12-14 01:12:00		2015-12-14 01:12:00	180	0
-0.0555556	2015-12-14 01:13:00		2015-12-14 01:13:00	180	0
-0.0555556	2015-12-14 01:14:00		2015-12-14 01:14:00	180	0
-0.0555556	2015-12-14 01:15:00		2015-12-14 01:15:00	180	0
-0.0555556	2015-12-14 01:16:00		2015-12-14 01:16:00	180	0
-0.0555556	2015-12-14 01:17:00		2015-12-14 01:17:00	180	0.44704
-0.111111	2015-12-14 01:18:00		2015-12-14 01:18:00	180	0.44704
-0.111111	2015-12-14 01:19:00		2015-12-14 01:19:00	180	0
-0.0555556	2015-12-14 01:20:00		2015-12-14 01:20:00		0
-0.111111	2015-12-14 01:21:00		2015-12-14 01:21:00		0
-0.111111	2015-12-14 01:22:00		2015-12-14 01:22:00		0
-0.111111	2015-12-14 01:23:00		2015-12-14 01:23:00		0
-0.111111	2015-12-14 01:24:00		2015-12-14 01:24:00		0
-0.111111	2015-12-14 01:25:00		2015-12-14 01:25:00		0
-0.111111	2015-12-14 01:26:00		2015-12-14 01:26:00	180	0
-0.166667	2015-12-14 01:27:00		2015-12-14 01:27:00	180	0
-0.166667	2015-12-14 01:28:00		2015-12-14 01:28:00	180	0
-0.166667	2015-12-14 01:29:00		2015-12-14 01:29:00	180	0
-0.166667	2015-12-14 01:30:00		2015-12-14 01:30:00		0
-0.166667	2015-12-14 01:31:00		2015-12-14 01:31:00	180	0
-0.166667	2015-12-14 01:32:00		2015-12-14 01:32:00	180	0
-0.166667	2015-12-14 01:33:00		2015-12-14 01:33:00		0
-0.222222	2015-12-14 01:34:00		2015-12-14 01:34:00		0
-0.222222	2015-12-14 01:35:00		2015-12-14 01:35:00		0
-0.222222	2015-12-14 01:36:00		2015-12-14 01:36:00		0
-0.222222	2015-12-14 01:37:00		2015-12-14 01:37:00		0
-0.222222	2015-12-14 01:38:00		2015-12-14 01:38:00		0
-0.222222	2015-12-14 01:39:00		2015-12-14 01:39:00		0
-0.222222	2015-12-14 01:40:00		2015-12-14 01:40:00		0
-0.222222	2015-12-14 01:41:00		2015-12-14 01:41:00		0
-0.222222	2015-12-14 01:42:00		2015-12-14 01:42:00		0
-0.222222	2015-12-14 01:43:00		2015-12-14 01:43:00		0
-0.222222	2015-12-14 01:44:00		2015-12-14 01:44:00		0
-0.222222	2015-12-14 01:45:00		2015-12-14 01:45:00		0
-0.222222	2015-12-14 01:46:00		2015-12-14 01:46:00		0
-0.222222	2015-12-14 01:47:00		2015-12-14 01:47:00		0
-0.222222	2015-12-14 01:48:00		2015-12-14 01:48:00	180	0
-0.277778	2015-12-14 01:49:00		2015-12-14 01:49:00	180	0
-0.277778	2015-12-14 01:50:00		2015-12-14 01:50:00		0
-0.222222	2015-12-14 01:51:00		2015-12-14 01:51:00		0
-0.277778	2015-12-14 01:52:00		2015-12-14 01:52:00		0
-0.277778	2015-12-14 01:53:00		2015-12-14 01:53:00		0
-0.277778	2015-12-14 01:54:00		2015-12-14 01:54:00		0
-0.277778	2015-12-14 01:55:00		2015-12-14 01:55:00	180	0
-0.277778	2015-12-14 01:56:00		2015-12-14 01:56:00	180	0
-0.222222	2015-12-14 01:57:00		2015-12-14 01:57:00	180	0
-0.222222	2015-12-14 01:58:00		2015-12-14 01:58:00		0
-0.222222	2015-12-14 01:59:00		2015-12-14 01:59:00		0
-0.222222	2015-12-14 02:00:00		2015-12-14 02:00:00		0
-0.222222	2015-12-14 02:01:00		2015-12-14 02:01:00		0
-0.222222	2015-12-14 02:02:00		2015-12-14 02:02:00		0
-0.222222	2015-12-14 02:03:00		2015-12-14 02:03:00		0
-0.222222	2015-12-14 02:04:00		2015-12-14 02:04:00	225	0
-0.277778	2015-12-14 02:05:00		2015-12-14 02:05:00	225	0
-0.277778	2015-12-14 02:06:00		2015-12-14 02:06:00	247.5	0
-0.277778	2015-12-14 02:07:00		2015-12-14 02:07:00		0
-0.277778	2015-12-14 02:08:00		2015-12-14 02:08:00		0
-0.277778	2015-12-14 02:09:00		2015-12-14 02:09:00		0
-0.333333	2015-12-14 02:10:00		2015-12-14 02:10:00		0
-0.333333	2015-12-14 02:11:00		2015-12-14 02:11:00		0
-0.333333	2015-12-14 02:12:00		2015-12-14 02:12:00		0
-0.333333	2015-12-14 02:13:00		2015-12-14 02:13:00		0
-0.333333	2015-12-14 02:14:00		2015-12-14 02:14:00		0
-0.333333	2015-12-14 02:15:00		2015-12-14 02:15:00		0
-0.333333	2015-12-14 02:16:00		2015-12-14 02:16:00		0
-0.333333	2015-12-14 02:17:00		2015-12-14 02:17:00		0
-0.388889	2015-12-14 02:18:00		2015-12-14 02:18:00		0
-0.388889	2015-12-14 02:19:00		2015-12-14 02:19:00		0
-0.388889	2015-12-14 02:20:00		2015-12-14 02:20:00		0
-0.388889	2015-12-14 02:21:00		2015-12-14 02:21:00		0
-0.444444	2015-12-14 02:22:00		2015-12-14 02:22:00		0
-0.444444	2015-12-14 02:23:00		2015-12-14 02:23:00		0
-0.444444	2015-12-14 02:24:00		2015-12-14 02:24:00		0
-0.444444	2015-12-14 02:25:00		2015-12-14 02:25:00		0
-0.444444	2015-12-14 02:26:00		2015-12-14 02:26:00		0
-0.444444	2015-12-14 02:27:00		2015-12-14 02:27:00		0
-0.444444	2015-12-14 02:28:00		2015-12-14 02:28:00		0
-0.444444	2015-12-14 02:29:00		2015-12-14 02:29:00		0
-0.444444	2015-12-14 02:30:00		2015-12-14 02:30:00	225	0
-0.5	2015-12-14 02:31:00		2015-12-14 02:31:00	202.5	0
-0.5	2015-12-14 02:32:00		2015-12-14 02:32:00	202.5	0
-0.5	2015-12-14 02:33:00		2015-12-14 02:33:00		0
-0.5	2015-12-14 02:34:00		2015-12-14 02:34:00		0
-0.5	2015-12-14 02:35:00		2015-12-14 02:35:00	202.5	0
-0.5	2015-12-14 02:36:00		2015-12-14 02:36:00		0
-0.5	2015-12-14 02:37:00		2015-12-14 02:37:00		0
-0.5	2015-12-14 02:38:00		2015-12-14 02:38:00		0
-0.5	2015-12-14 02:39:00		2015-12-14 02:39:00	202.5	0
-0.5	2015-12-14 02:40:00		2015-12-14 02:40:00	202.5	0
-0.5	2015-12-14 02:41:00		2015-12-14 02:41:00		0
-0.5	2015-12-14 02:42:00		2015-12-14 02:42:00		0
-0.5	2015-12-14 02:43:00		2015-12-14 02:43:00		0
-0.5	2015-12-14 02:44:00		2015-12-14 02:44:00		0
-0.5	2015-12-14 02:45:00		2015-12-14 02:45:00		0
-0.555556	2015-12-14 02:46:00		2015-12-14 02:46:00		0
-0.555556	2015-12-14 02:47:00		2015-12-14 02:47:00	202.5	0
-0.555556	2015-12-14 02:48:00		2015-12-14 02:48:00		0
-0.555556	2015-12-14 02:49:00		2015-12-14 02:49:00		0
-0.555556	2015-12-14 02:50:00		2015-12-14 02:50:00	202.5	0
-0.555556	2015-12-14 02:51:00		2015-12-14 02:51:00	180	0.44704
-0.555556	2015-12-14 02:52:00		2015-12-14 02:52:00	180	0
-0.555556	2015-12-14 02:53:00		2015-12-14 02:53:00	157.5	0
-0.555556	2015-12-14 02:54:00		2015-12-14 02:54:00	157.5	0
-0.611111	2015-12-14 02:55:00		2015-12-14 02:55:00	157.5	0
-0.611111	2015-12-14 02:56:00		2015-12-14 02:56:00	157.5	0.44704
-0.611111	2015-12-14 02:57:00		2015-12-14 02:57:00	157.5	0.44704
-0.611111	2015-12-14 02:58:00		2015-12-14 02:58:00	157.5	0
-0.611111	2015-12-14 02:59:00		2015-12-14 02:59:00	157.5	0.44704
-0.666667	2015-12-14 03:00:00		2015-12-14 03:00:00	157.5	0
-0.666667	2015-12-14 03:01:00		2015-12-14 03:01:00	180	0
-0.666667	2015-12-14 03:02:00		2015-12-14 03:02:00	180	0
-0.666667	2015-12-14 03:03:00		2015-12-14 03:03:00	180	0
-0.722222	2015-12-14 03:04:00		2015-12-14 03:04:00		0
-0.722222	2015-12-14 03:05:00		2015-12-14 03:05:00		0
-0.722222	2015-12-14 03:06:00		2015-12-14 03:06:00	202.5	0
-0.777778	2015-12-14 03:07:00		2015-12-14 03:07:00		0
-0.777778	2015-12-14 03:08:00		2015-12-14 03:08:00	202.5	0
-0.777778	2015-12-14 03:09:00		2015-12-14 03:09:00		0
-0.833333	2015-12-14 03:10:00		2015-12-14 03:10:00		0
-0.833333	2015-12-14 03:11:00		2015-12-14 03:11:00		0
-0.833333	2015-12-14 03:12:00		2015-12-14 03:12:00	202.5	0
-0.833333	2015-12-14 03:13:00		2015-12-14 03:13:00	202.5	0
-0.888889	2015-12-14 03:14:00		2015-12-14 03:14:00	202.5	0
-0.944444	2015-12-14 03:15:00		2015-12-14 03:15:00	180	0
-0.944444	2015-12-14 03:16:00		2015-12-14 03:16:00	180	0
-0.944444	2015-12-14 03:17:00		2015-12-14 03:17:00	180	0
-1	2015-12-14 03:18:00		2015-12-14 03:18:00	180	0
-1	2015-12-14 03:19:00		2015-12-14 03:19:00	180	0
-1	2015-12-14 03:20:00		2015-12-14 03:20:00	180	0
-1.05556	2015-12-14 03:21:00		2015-12-14 03:21:00	157.5	0.44704
-1.05556	2015-12-14 03:22:00		2015-12-14 03:22:00	157.5	0
-1.05556	2015-12-14 03:23:00		2015-12-14 03:23:00	157.5	0
-1.05556	2015-12-14 03:24:00		2015-12-14 03:24:00	157.5	0
-1.05556	2015-12-14 03:25:00		2015-12-14 03:25:00	180	0
-1.11111	2015-12-14 03:26:00		2015-12-14 03:26:00	157.5	0
-1.11111	2015-12-14 03:27:00		2015-12-14 03:27:00	157.5	0
-1.11111	2015-12-14 03:28:00		2015-12-14 03:28:00	157.5	0
-1.16667	2015-12-14 03:29:00		2015-12-14 03:29:00	157.5	0
-1.16667	2015-12-14 03:30:00		2015-12-14 03:30:00	157.5	0.44704
-1.16667	2015-12-14 03:31:00		2015-12-14 03:31:00	157.5	0
-1.16667	2015-12-14 03:32:00		2015-12-14 03:32:00	157.5	0
-1.16667	2015-12-14 03:33:00		2015-12-14 03:33:00		0
-1.16667	2015-12-14 03:34:00		2015-12-14 03:34:00		0
-1.16667	2015-12-14 03:35:00		2015-12-14 03:35:00	157.5	0
-1.16667	2015-12-14 03:36:00		2015-12-14 03:36:00		0
-1.16667	2015-12-14 03:37:00		2015-12-14 03:37:00	180	0
-1.16667	2015-12-14 03:38:00		2015-12-14 03:38:00	135	0.44704
-1.16667	2015-12-14 03:39:00		2015-12-14 03:39:00	135	0
-1.16667	2015-12-14 03:40:00		2015-12-14 03:40:00	135	0.44704
-1.16667	2015-12-14 03:41:00		2015-12-14 03:41:00	157.5	0
-1.16667	2015-12-14 03:42:00		2015-12-14 03:42:00	157.5	0
-1.16667	2015-12-14 03:43:00		2015-12-14 03:43:00	157.5	0
-1.16667	2015-12-14 03:44:00		2015-12-14 03:44:00	157.5	0.44704
-1.22222	2015-12-14 03:45:00		2015-12-14 03:45:00	157.5	0.44704
-1.22222	2015-12-14 03:46:00		2015-12-14 03:46:00	157.5	0.44704
-1.22222	2015-12-14 03:47:00		2015-12-14 03:47:00	157.5	0
-1.22222	2015-12-14 03:48:00		2015-12-14 03:48:00	157.5	0.44704
-1.22222	2015-12-14 03:49:00		2015-12-14 03:49:00	157.5	0.44704
-1.22222	2015-12-14 03:50:00		2015-12-14 03:50:00	157.5	0
-1.22222	2015-12-14 03:51:00		2015-12-14 03:51:00	157.5	0.44704
-1.22222	2015-12-14 03:52:00		2015-12-14 03:52:00	157.5	0.44704
-1.22222	2015-12-14 03:53:00		2015-12-14 03:53:00	157.5	0.44704
-1.22222	2015-12-14 03:54:00		2015-12-14 03:54:00	180	0
-1.22222	2015-12-14 03:55:00		2015-12-14 03:55:00	157.5	0.44704
-1.22222	2015-12-14 03:56:00		2015-12-14 03:56:00	157.5	0.44704
-1.27778	2015-12-14 03:57:00		2015-12-14 03:57:00	135	0.44704
-1.27778	2015-12-14 03:58:00		2015-12-14 03:58:00	135	0.44704
-1.27778	2015-12-14 03:59:00		2015-12-14 03:59:00	135	0
-1.27778	2015-12-14 04:00:00		2015-12-14 04:00:00	157.5	0
-1.27778	2015-12-14 04:01:00		2015-12-14 04:01:00	157.5	0
-1.27778	2015-12-14 04:02:00		2015-12-14 04:02:00	157.5	0
-1.27778	2015-12-14 04:03:00		2015-12-14 04:03:00	157.5	0.44704
-1.27778	2015-12-14 04:04:00		2015-12-14 04:04:00	157.5	0
-1.33333	2015-12-14 04:05:00		2015-12-14 04:05:00	157.5	0
-1.33333	2015-12-14 04:06:00		2015-12-14 04:06:00	157.5	0
-1.27778	2015-12-14 04:07:00		2015-12-14 04:07:00	157.5	0
-1.33333	2015-12-14 04:08:00		2015-12-14 04:08:00	90	0.44704
-1.33333	2015-12-14 04:09:00		2015-12-14 04:09:00	90	0
-1.33333	2015-12-14 04:10:00		2015-12-14 04:10:00	112.5	0
-1.33333	2015-12-14 04:11:00		2015-12-14 04:11:00	112.5	0
-1.33333	2015-12-14 04:12:00		2015-12-14 04:12:00	112.5	0
-1.33333	2015-12-14 04:13:00		2015-12-14 04:13:00	112.5	0
-1.33333	2015-12-14 04:14:00		2015-12-14 04:14:00	112.5	0
-1.27778	2015-12-14 04:15:00		2015-12-14 04:15:00	112.5	0
-1.27778	2015-12-14 04:16:00		2015-12-14 04:16:00		0
-1.27778	2015-12-14 04:17:00		2015-12-14 04:17:00	135	0
-1.27778	2015-12-14 04:18:00		2015-12-14 04:18:00	135	0
-1.27778	2015-12-14 04:19:00		2015-12-14 04:19:00	112.5	0
-1.27778	2015-12-14 04:20:00		2015-12-14 04:20:00	90	0.44704
-1.27778	2015-12-14 04:21:00		2015-12-14 04:21:00	90	0
-1.27778	2015-12-14 04:22:00		2015-12-14 04:22:00		0
-1.27778	2015-12-14 04:23:00		2015-12-14 04:23:00	90	0
-1.27778	2015-12-14 04:24:00		2015-12-14 04:24:00	90	0
-1.27778	2015-12-14 04:25:00		2015-12-14 04:25:00	90	0
-1.27778	2015-12-14 04:26:00		2015-12-14 04:26:00	67.5	0
-1.22222	2015-12-14 04:27:00		2015-12-14 04:27:00		0
-1.22222	2015-12-14 04:28:00		2015-12-14 04:28:00		0
-1.22222	2015-12-14 04:29:00		2015-12-14 04:29:00		0
-1.22222	2015-12-14 04:30:00		2015-12-14 04:30:00	90	0.44704
-1.22222	2015-12-14 04:31:00		2015-12-14 04:31:00	90	0
-1.22222	2015-12-14 04:32:00		2015-12-14 04:32:00	90	0
-1.22222	2015-12-14 04:33:00		2015-12-14 04:33:00	90	0
-1.22222	2015-12-14 04:34:00		2015-12-14 04:34:00	90	0
-1.22222	2015-12-14 04:35:00		2015-12-14 04:35:00	112.5	0.44704
-1.22222	2015-12-14 04:36:00		2015-12-14 04:36:00	112.5	0.44704
-1.22222	2015-12-14 04:37:00		2015-12-14 04:37:00	135	0
-1.22222	2015-12-14 04:38:00		2015-12-14 04:38:00	135	0
-1.22222	2015-12-14 04:39:00		2015-12-14 04:39:00	135	0
-1.27778	2015-12-14 04:40:00		2015-12-14 04:40:00	135	0.44704
-1.27778	2015-12-14 04:41:00		2015-12-14 04:41:00	157.5	0
-1.27778	2015-12-14 04:42:00		2015-12-14 04:42:00	157.5	0.44704
-1.27778	2015-12-14 04:43:00		2015-12-14 04:43:00	135	0.44704
-1.27778	2015-12-14 04:44:00		2015-12-14 04:44:00	135	0.44704
-1.27778	2015-12-14 04:45:00		2015-12-14 04:45:00	135	0.44704
-1.27778	2015-12-14 04:46:00		2015-12-14 04:46:00	135	0
-1.33333	2015-12-14 04:47:00		2015-12-14 04:47:00	135	0.44704
-1.33333	2015-12-14 04:48:00		2015-12-14 04:48:00	135	0.44704
-1.33333	2015-12-14 04:49:00		2015-12-14 04:49:00	135	0.44704
-1.33333	2015-12-14 04:50:00		2015-12-14 04:50:00	135	0
-1.33333	2015-12-14 04:51:00		2015-12-14 04:51:00	157.5	0.44704
-1.33333	2015-12-14 04:52:00		2015-12-14 04:52:00	157.5	0
-1.33333	2015-12-14 04:53:00		2015-12-14 04:53:00	157.5	0.44704
-1.33333	2015-12-14 04:54:00		2015-12-14 04:54:00	157.5	0
-1.33333	2015-12-14 04:55:00		2015-12-14 04:55:00	157.5	0
-1.33333	2015-12-14 04:56:00		2015-12-14 04:56:00	157.5	0
-1.33333	2015-12-14 04:57:00		2015-12-14 04:57:00	157.5	0.44704
-1.33333	2015-12-14 04:58:00		2015-12-14 04:58:00	157.5	0.44704
-1.38889	2015-12-14 04:59:00		2015-12-14 04:59:00	157.5	0.44704
-1.38889	2015-12-14 05:00:00		2015-12-14 05:00:00	157.5	0.44704
-1.38889	2015-12-14 05:01:00		2015-12-14 05:01:00	157.5	0.44704
-1.38889	2015-12-14 05:02:00		2015-12-14 05:02:00	135	0.44704
-1.38889	2015-12-14 05:03:00		2015-12-14 05:03:00	135	0.44704
-1.38889	2015-12-14 05:04:00		2015-12-14 05:04:00	157.5	0.44704
-1.44444	2015-12-14 05:05:00		2015-12-14 05:05:00	157.5	0.44704
-1.44444	2015-12-14 05:06:00		2015-12-14 05:06:00	157.5	0.44704
-1.44444	2015-12-14 05:07:00		2015-12-14 05:07:00	157.5	0.44704
-1.44444	2015-12-14 05:08:00		2015-12-14 05:08:00	157.5	0.44704
-1.44444	2015-12-14 05:09:00		2015-12-14 05:09:00	157.5	0
-1.44444	2015-12-14 05:10:00		2015-12-14 05:10:00	157.5	0.44704
-1.44444	2015-12-14 05:11:00		2015-12-14 05:11:00	135	0.44704
-1.44444	2015-12-14 05:12:00		2015-12-14 05:12:00	135	0.44704
-1.44444	2015-12-14 05:13:00		2015-12-14 05:13:00	157.5	0.44704
-1.44444	2015-12-14 05:14:00		2015-12-14 05:14:00	157.5	0
-1.44444	2015-12-14 05:15:00		2015-12-14 05:15:00	157.5	0
-1.44444	2015-12-14 05:16:00		2015-12-14 05:16:00	157.5	0
-1.44444	2015-12-14 05:17:00		2015-12-14 05:17:00	157.5	0
-1.44444	2015-12-14 05:18:00		2015-12-14 05:18:00	157.5	0
-1.44444	2015-12-14 05:19:00		2015-12-14 05:19:00	157.5	0.44704
-1.44444	2015-12-14 05:20:00		2015-12-14 05:20:00	157.5	0
-1.5	2015-12-14 05:21:00		2015-12-14 05:21:00	157.5	0
-1.44444	2015-12-14 05:22:00		2015-12-14 05:22:00	135	0.44704
-1.5	2015-12-14 05:23:00		2015-12-14 05:23:00	135	0
-1.5	2015-12-14 05:24:00		2015-12-14 05:24:00	112.5	0.44704
-1.44444	2015-12-14 05:25:00		2015-12-14 05:25:00	135	0
-1.5	2015-12-14 05:26:00		2015-12-14 05:26:00	135	0
-1.44444	2015-12-14 05:27:00		2015-12-14 05:27:00	135	0
-1.5	2015-12-14 05:28:00		2015-12-14 05:28:00	157.5	0
-1.44444	2015-12-14 05:29:00		2015-12-14 05:29:00	157.5	0.44704
-1.44444	2015-12-14 05:30:00		2015-12-14 05:30:00	157.5	0.44704
-1.44444	2015-12-14 05:31:00		2015-12-14 05:31:00	157.5	0.44704
-1.44444	2015-12-14 05:32:00		2015-12-14 05:32:00	157.5	0.44704
-1.44444	2015-12-14 05:33:00		2015-12-14 05:33:00	157.5	0.44704
-1.44444	2015-12-14 05:34:00		2015-12-14 05:34:00	157.5	0
-1.5	2015-12-14 05:35:00		2015-12-14 05:35:00	157.5	0
-1.44444	2015-12-14 05:36:00		2015-12-14 05:36:00	157.5	0.44704
-1.5	2015-12-14 05:37:00		2015-12-14 05:37:00	157.5	0
-1.44444	2015-12-14 05:38:00		2015-12-14 05:38:00	157.5	0.44704
-1.5	2015-12-14 05:39:00		2015-12-14 05:39:00	157.5	0
-1.44444	2015-12-14 05:40:00		2015-12-14 05:40:00	157.5	0
-1.44444	2015-12-14 05:41:00		2015-12-14 05:41:00	157.5	0.44704
-1.44444	2015-12-14 05:42:00		2015-12-14 05:42:00	157.5	0.44704
-1.44444	2015-12-14 05:43:00		2015-12-14 05:43:00	157.5	0
-1.44444	2015-12-14 05:44:00		2015-12-14 05:44:00	157.5	0.44704
-1.44444	2015-12-14 05:45:00		2015-12-14 05:45:00	157.5	0.44704
-1.44444	2015-12-14 05:46:00		2015-12-14 05:46:00	157.5	0.44704
-1.44444	2015-12-14 05:47:00		2015-12-14 05:47:00	157.5	0
-1.44444	2015-12-14 05:48:00		2015-12-14 05:48:00	157.5	0.44704
-1.44444	2015-12-14 05:49:00		2015-12-14 05:49:00	157.5	0.44704
-1.44444	2015-12-14 05:50:00		2015-12-14 05:50:00	157.5	0.44704
-1.38889	2015-12-14 05:51:00		2015-12-14 05:51:00	157.5	0.44704
-1.38889	2015-12-14 05:52:00		2015-12-14 05:52:00	157.5	0.44704
-1.38889	2015-12-14 05:53:00		2015-12-14 05:53:00	157.5	0.44704
-1.38889	2015-12-14 05:54:00		2015-12-14 05:54:00	157.5	0.44704
-1.38889	2015-12-14 05:55:00		2015-12-14 05:55:00	157.5	0.44704
-1.38889	2015-12-14 05:56:00		2015-12-14 05:56:00	135	0.44704
-1.38889	2015-12-14 05:57:00		2015-12-14 05:57:00	157.5	0.44704
-1.33333	2015-12-14 05:58:00		2015-12-14 05:58:00	157.5	0.44704
-1.38889	2015-12-14 05:59:00		2015-12-14 05:59:00	157.5	0
-1.33333	2015-12-14 06:00:00		2015-12-14 06:00:00	157.5	0.44704
-1.33333	2015-12-14 06:01:00		2015-12-14 06:01:00	157.5	0.44704
-1.33333	2015-12-14 06:02:00		2015-12-14 06:02:00	157.5	0.89408
-1.33333	2015-12-14 06:03:00		2015-12-14 06:03:00	112.5	0.44704
-1.33333	2015-12-14 06:04:00		2015-12-14 06:04:00	135	0.44704
-1.38889	2015-12-14 06:05:00		2015-12-14 06:05:00	135	0.44704
-1.38889	2015-12-14 06:06:00		2015-12-14 06:06:00	157.5	0.44704
-1.33333	2015-12-14 06:07:00		2015-12-14 06:07:00	157.5	0.44704
-1.38889	2015-12-14 06:08:00		2015-12-14 06:08:00	157.5	0
-1.38889	2015-12-14 06:09:00		2015-12-14 06:09:00	180	0
-1.38889	2015-12-14 06:10:00		2015-12-14 06:10:00	180	0.44704
-1.38889	2015-12-14 06:11:00		2015-12-14 06:11:00	157.5	0.44704
-1.38889	2015-12-14 06:12:00		2015-12-14 06:12:00	157.5	0.44704
-1.44444	2015-12-14 06:13:00		2015-12-14 06:13:00	157.5	0.44704
-1.44444	2015-12-14 06:14:00		2015-12-14 06:14:00	157.5	0.44704
-1.44444	2015-12-14 06:15:00		2015-12-14 06:15:00	157.5	0.44704
-1.44444	2015-12-14 06:16:00		2015-12-14 06:16:00	135	0.44704
-1.5	2015-12-14 06:17:00		2015-12-14 06:17:00	157.5	0.44704
-1.5	2015-12-14 06:18:00		2015-12-14 06:18:00	157.5	0
-1.5	2015-12-14 06:19:00		2015-12-14 06:19:00	157.5	0
-1.5	2015-12-14 06:20:00		2015-12-14 06:20:00	180	0
-1.5	2015-12-14 06:21:00		2015-12-14 06:21:00	180	0
-1.55556	2015-12-14 06:22:00		2015-12-14 06:22:00	180	0
-1.55556	2015-12-14 06:23:00		2015-12-14 06:23:00	180	0.44704
-1.55556	2015-12-14 06:24:00		2015-12-14 06:24:00	157.5	0.44704
-1.55556	2015-12-14 06:25:00		2015-12-14 06:25:00	180	0.44704
-1.55556	2015-12-14 06:26:00		2015-12-14 06:26:00	157.5	0.44704
-1.55556	2015-12-14 06:27:00		2015-12-14 06:27:00	157.5	0.44704
-1.55556	2015-12-14 06:28:00		2015-12-14 06:28:00	157.5	0.44704
-1.61111	2015-12-14 06:29:00		2015-12-14 06:29:00	157.5	0.44704
-1.61111	2015-12-14 06:30:00		2015-12-14 06:30:00	157.5	0.44704
-1.61111	2015-12-14 06:31:00		2015-12-14 06:31:00	157.5	0
-1.61111	2015-12-14 06:32:00		2015-12-14 06:32:00	180	0
-1.66667	2015-12-14 06:33:00		2015-12-14 06:33:00	180	0.44704
-1.66667	2015-12-14 06:34:00		2015-12-14 06:34:00	202.5	0.44704
-1.66667	2015-12-14 06:35:00		2015-12-14 06:35:00	202.5	0
-1.66667	2015-12-14 06:36:00		2015-12-14 06:36:00	202.5	0
-1.66667	2015-12-14 06:37:00		2015-12-14 06:37:00	202.5	0
-1.66667	2015-12-14 06:38:00		2015-12-14 06:38:00	202.5	0.44704
-1.66667	2015-12-14 06:39:00		2015-12-14 06:39:00	180	0.44704
-1.66667	2015-12-14 06:40:00		2015-12-14 06:40:00	180	0.44704
-1.66667	2015-12-14 06:41:00		2015-12-14 06:41:00	157.5	0.44704
-1.66667	2015-12-14 06:42:00		2015-12-14 06:42:00	157.5	0.44704
-1.66667	2015-12-14 06:43:00		2015-12-14 06:43:00	180	0.44704
-1.72222	2015-12-14 06:44:00		2015-12-14 06:44:00	180	0
-1.72222	2015-12-14 06:45:00		2015-12-14 06:45:00		0
-1.72222	2015-12-14 06:46:00		2015-12-14 06:46:00		0
-1.72222	2015-12-14 06:47:00		2015-12-14 06:47:00		0
-1.72222	2015-12-14 06:48:00		2015-12-14 06:48:00		0
-1.72222	2015-12-14 06:49:00		2015-12-14 06:49:00		0
-1.72222	2015-12-14 06:50:00		2015-12-14 06:50:00		0
-1.72222	2015-12-14 06:51:00		2015-12-14 06:51:00	202.5	0
-1.72222	2015-12-14 06:52:00		2015-12-14 06:52:00	202.5	0
-1.72222	2015-12-14 06:53:00		2015-12-14 06:53:00		0
-1.72222	2015-12-14 06:54:00		2015-12-14 06:54:00		0
-1.72222	2015-12-14 06:55:00		2015-12-14 06:55:00	202.5	0
-1.72222	2015-12-14 06:56:00		2015-12-14 06:56:00	202.5	0
-1.72222	2015-12-14 06:57:00		2015-12-14 06:57:00	180	0
-1.72222	2015-12-14 06:58:00		2015-12-14 06:58:00	180	0
-1.72222	2015-12-14 06:59:00		2015-12-14 06:59:00	180	0.44704
-1.72222	2015-12-14 07:00:00		2015-12-14 07:00:00	180	0
-1.66667	2015-12-14 07:01:00		2015-12-14 07:01:00	180	0
-1.72222	2015-12-14 07:02:00		2015-12-14 07:02:00	180	0
-1.72222	2015-12-14 07:03:00		2015-12-14 07:03:00	180	0
-1.72222	2015-12-14 07:04:00		2015-12-14 07:04:00		0
-1.72222	2015-12-14 07:05:00		2015-12-14 07:05:00		0
-1.72222	2015-12-14 07:06:00		2015-12-14 07:06:00		0
-1.66667	2015-12-14 07:07:00		2015-12-14 07:07:00		0
-1.66667	2015-12-14 07:08:00		2015-12-14 07:08:00	180	0
-1.66667	2015-12-14 07:09:00		2015-12-14 07:09:00		0
-1.66667	2015-12-14 07:10:00		2015-12-14 07:10:00	180	0
-1.66667	2015-12-14 07:11:00		2015-12-14 07:11:00		0
-1.66667	2015-12-14 07:12:00		2015-12-14 07:12:00	202.5	0
-1.66667	2015-12-14 07:13:00		2015-12-14 07:13:00	202.5	0
-1.66667	2015-12-14 07:14:00		2015-12-14 07:14:00	202.5	0
-1.66667	2015-12-14 07:15:00		2015-12-14 07:15:00	202.5	0
-1.66667	2015-12-14 07:16:00		2015-12-14 07:16:00	202.5	0
-1.61111	2015-12-14 07:17:00		2015-12-14 07:17:00	202.5	0
-1.61111	2015-12-14 07:18:00		2015-12-14 07:18:00	202.5	0
-1.61111	2015-12-14 07:19:00		2015-12-14 07:19:00		0
-1.61111	2015-12-14 07:20:00		2015-12-14 07:20:00		0
-1.61111	2015-12-14 07:21:00		2015-12-14 07:21:00		0
-1.61111	2015-12-14 07:22:00		2015-12-14 07:22:00		0
-1.61111	2015-12-14 07:23:00		2015-12-14 07:23:00	202.5	0
-1.61111	2015-12-14 07:24:00		2015-12-14 07:24:00	202.5	0
-1.55556	2015-12-14 07:25:00		2015-12-14 07:25:00	202.5	0
-1.55556	2015-12-14 07:26:00		2015-12-14 07:26:00	180	0
-1.55556	2015-12-14 07:27:00		2015-12-14 07:27:00	180	0
-1.55556	2015-12-14 07:28:00		2015-12-14 07:28:00	180	0
-1.55556	2015-12-14 07:29:00		2015-12-14 07:29:00	180	0
-1.55556	2015-12-14 07:30:00		2015-12-14 07:30:00		0
-1.55556	2015-12-14 07:31:00		2015-12-14 07:31:00		0
-1.55556	2015-12-14 07:32:00		2015-12-14 07:32:00	180	0
-1.55556	2015-12-14 07:33:00		2015-12-14 07:33:00		0
-1.5	2015-12-14 07:34:00		2015-12-14 07:34:00	202.5	0
-1.5	2015-12-14 07:35:00		2015-12-14 07:35:00	202.5	0
-1.5	2015-12-14 07:36:00		2015-12-14 07:36:00	202.5	0
-1.5	2015-12-14 07:37:00		2015-12-14 07:37:00		0
-1.5	2015-12-14 07:38:00		2015-12-14 07:38:00		0
-1.5	2015-12-14 07:39:00		2015-12-14 07:39:00	202.5	0
-1.5	2015-12-14 07:40:00		2015-12-14 07:40:00		0
-1.44444	2015-12-14 07:41:00		2015-12-14 07:41:00		0
-1.44444	2015-12-14 07:42:00		2015-12-14 07:42:00		0
-1.44444	2015-12-14 07:43:00		2015-12-14 07:43:00		0
-1.38889	2015-12-14 07:44:00		2015-12-14 07:44:00		0
-1.38889	2015-12-14 07:45:00		2015-12-14 07:45:00		0
-1.33333	2015-12-14 07:46:00		2015-12-14 07:46:00		0
-1.33333	2015-12-14 07:47:00		2015-12-14 07:47:00	202.5	0
-1.33333	2015-12-14 07:48:00		2015-12-14 07:48:00		0
-1.27778	2015-12-14 07:49:00		2015-12-14 07:49:00		0
-1.27778	2015-12-14 07:50:00		2015-12-14 07:50:00		0
-1.22222	2015-12-14 07:51:00		2015-12-14 07:51:00		0
-1.22222	2015-12-14 07:52:00		2015-12-14 07:52:00		0
-1.22222	2015-12-14 07:53:00		2015-12-14 07:53:00		0
-1.22222	2015-12-14 07:54:00		2015-12-14 07:54:00		0
-1.16667	2015-12-14 07:55:00		2015-12-14 07:55:00	225	0
-1.16667	2015-12-14 07:56:00		2015-12-14 07:56:00	202.5	0
-1.16667	2015-12-14 07:57:00		2015-12-14 07:57:00	202.5	0
-1.16667	2015-12-14 07:58:00		2015-12-14 07:58:00		0
-1.11111	2015-12-14 07:59:00		2015-12-14 07:59:00		0
-1.11111	2015-12-14 08:00:00		2015-12-14 08:00:00	202.5	0
-1.11111	2015-12-14 08:01:00		2015-12-14 08:01:00	180	0
-1.05556	2015-12-14 08:02:00		2015-12-14 08:02:00	180	0
-1.05556	2015-12-14 08:03:00		2015-12-14 08:03:00		0
-1.05556	2015-12-14 08:04:00		2015-12-14 08:04:00	180	0
-1.05556	2015-12-14 08:05:00		2015-12-14 08:05:00	157.5	0.44704
-1	2015-12-14 08:06:00		2015-12-14 08:06:00	135	0.44704
-1	2015-12-14 08:07:00		2015-12-14 08:07:00	135	0
-1	2015-12-14 08:08:00		2015-12-14 08:08:00	135	0
-1	2015-12-14 08:09:00		2015-12-14 08:09:00	135	0
-0.944444	2015-12-14 08:10:00		2015-12-14 08:10:00	135	0
-0.944444	2015-12-14 08:11:00		2015-12-14 08:11:00	157.5	0.44704
-0.944444	2015-12-14 08:12:00		2015-12-14 08:12:00	180	0
-0.944444	2015-12-14 08:13:00		2015-12-14 08:13:00	157.5	0
-0.944444	2015-12-14 08:14:00		2015-12-14 08:14:00	157.5	0
-0.888889	2015-12-14 08:15:00		2015-12-14 08:15:00	157.5	0
-0.888889	2015-12-14 08:16:00		2015-12-14 08:16:00		0
-0.888889	2015-12-14 08:17:00		2015-12-14 08:17:00		0
-0.833333	2015-12-14 08:18:00		2015-12-14 08:18:00		0
-0.833333	2015-12-14 08:19:00		2015-12-14 08:19:00		0
-0.833333	2015-12-14 08:20:00		2015-12-14 08:20:00		0
-0.833333	2015-12-14 08:21:00		2015-12-14 08:21:00		0
-0.777778	2015-12-14 08:22:00		2015-12-14 08:22:00	225	0
-0.777778	2015-12-14 08:23:00		2015-12-14 08:23:00	247.5	0
-0.722222	2015-12-14 08:24:00		2015-12-14 08:24:00		0
-0.722222	2015-12-14 08:25:00		2015-12-14 08:25:00	270	0
-0.722222	2015-12-14 08:26:00		2015-12-14 08:26:00	270	0
-0.666667	2015-12-14 08:27:00		2015-12-14 08:27:00	247.5	0
-0.666667	2015-12-14 08:28:00		2015-12-14 08:28:00	247.5	0
-0.666667	2015-12-14 08:29:00		2015-12-14 08:29:00	225	0
-0.666667	2015-12-14 08:30:00		2015-12-14 08:30:00	225	0
-0.666667	2015-12-14 08:31:00		2015-12-14 08:31:00	225	0
-0.666667	2015-12-14 08:32:00		2015-12-14 08:32:00	225	0
-0.666667	2015-12-14 08:33:00		2015-12-14 08:33:00	202.5	0.44704
-0.666667	2015-12-14 08:34:00		2015-12-14 08:34:00	135	0.44704
-0.666667	2015-12-14 08:35:00		2015-12-14 08:35:00	135	0
-0.666667	2015-12-14 08:36:00		2015-12-14 08:36:00	135	0
-0.611111	2015-12-14 08:37:00		2015-12-14 08:37:00	135	0
-0.611111	2015-12-14 08:38:00		2015-12-14 08:38:00	157.5	0
-0.666667	2015-12-14 08:39:00		2015-12-14 08:39:00	112.5	0.44704
-0.611111	2015-12-14 08:40:00		2015-12-14 08:40:00	90	0
-0.611111	2015-12-14 08:41:00		2015-12-14 08:41:00	90	0.44704
-0.611111	2015-12-14 08:42:00		2015-12-14 08:42:00	90	0
-0.611111	2015-12-14 08:43:00		2015-12-14 08:43:00	90	0
-0.611111	2015-12-14 08:44:00		2015-12-14 08:44:00	90	0
-0.611111	2015-12-14 08:45:00		2015-12-14 08:45:00	90	0
-0.611111	2015-12-14 08:46:00		2015-12-14 08:46:00	90	0.44704
-0.611111	2015-12-14 08:47:00		2015-12-14 08:47:00	67.5	0.44704
-0.611111	2015-12-14 08:48:00		2015-12-14 08:48:00	67.5	0.44704
-0.555556	2015-12-14 08:49:00		2015-12-14 08:49:00	67.5	0
-0.555556	2015-12-14 08:50:00		2015-12-14 08:50:00		0
-0.555556	2015-12-14 08:51:00		2015-12-14 08:51:00	67.5	0
-0.555556	2015-12-14 08:52:00		2015-12-14 08:52:00	67.5	0
-0.555556	2015-12-14 08:53:00		2015-12-14 08:53:00	67.5	0.44704
-0.555556	2015-12-14 08:54:00		2015-12-14 08:54:00	67.5	0.44704
-0.5	2015-12-14 08:55:00		2015-12-14 08:55:00	67.5	0.44704
-0.5	2015-12-14 08:56:00		2015-12-14 08:56:00	67.5	0.44704
-0.5	2015-12-14 08:57:00		2015-12-14 08:57:00	67.5	0.44704
-0.5	2015-12-14 08:58:00		2015-12-14 08:58:00	67.5	0
-0.5	2015-12-14 08:59:00		2015-12-14 08:59:00	67.5	0
-0.5	2015-12-14 09:00:00		2015-12-14 09:00:00	0	0.89408
-0.5	2015-12-14 09:01:00		2015-12-14 09:01:00	0	0.89408
-0.5	2015-12-14 09:02:00		2015-12-14 09:02:00	0	0.44704
-0.5	2015-12-14 09:03:00		2015-12-14 09:03:00	0	0.44704
-0.5	2015-12-14 09:04:00		2015-12-14 09:04:00	0	0.44704
-0.5	2015-12-14 09:05:00		2015-12-14 09:05:00	0	0.44704
-0.5	2015-12-14 09:06:00		2015-12-14 09:06:00	0	0.89408
-0.5	2015-12-14 09:07:00		2015-12-14 09:07:00	0	0.44704
-0.5	2015-12-14 09:08:00		2015-12-14 09:08:00	22.5	0.44704
-0.555556	2015-12-14 09:09:00		2015-12-14 09:09:00	0	0
-0.5	2015-12-14 09:10:00		2015-12-14 09:10:00		0
-0.5	2015-12-14 09:11:00		2015-12-14 09:11:00	22.5	0
-0.5	2015-12-14 09:12:00		2015-12-14 09:12:00	22.5	0
-0.5	2015-12-14 09:13:00		2015-12-14 09:13:00	22.5	0
-0.5	2015-12-14 09:14:00		2015-12-14 09:14:00	112.5	0.44704
-0.5	2015-12-14 09:15:00		2015-12-14 09:15:00	112.5	0
-0.5	2015-12-14 09:16:00		2015-12-14 09:16:00	135	0.44704
-0.5	2015-12-14 09:17:00		2015-12-14 09:17:00	135	0.44704
-0.555556	2015-12-14 09:18:00		2015-12-14 09:18:00	112.5	0.44704
[truncated: 9,288 more rows]

## Sheet: ACSM
Chl [ug m-3]	NH4 [ug m-3]	NO3 [ug m-3]	organics [ug m-3]	SO4 [ug m-3]	Date and time
	0.4269	1.29635	4.22585	0.0505141	2015-12-13 00:00:30
	0.826238	1.27119	3.72655	0.0694366	2015-12-13 00:04:30
	0.673053	1.35471	4.93678	0.088548	2015-12-13 00:08:30
0.00147286	0.398613	1.29675	4.98254	0.0789509	2015-12-13 00:12:31
	0.437241	1.22265	5.02319	0.0913167	2015-12-13 00:16:31
	0.940487	1.32536	6.19351	0.0960579	2015-12-13 00:20:31
	0.765169	1.11184	5.4264	0.0667744	2015-12-13 00:24:31
	0.598631	1.21553	6.59221	0.0618783	2015-12-13 00:28:31
	0.325637	1.1626	5.97659	0.0729151	2015-12-13 00:32:31
	0.34575	1.03421	5.75806	0.0822764	2015-12-13 00:36:31
	0.428729	1.05866	6.11366	0.0939304	2015-12-13 00:40:31
	0.17338	1.07204	6.08236	0.106364	2015-12-13 00:44:32
	0.2938	1.1308	6.35133	0.0884227	2015-12-13 00:48:32
	0.217409	1.06961	6.25631	0.1075	2015-12-13 00:52:32
	0.316455	1.16405	6.27479	0.089654	2015-12-13 00:56:32
	0.154013	1.09551	5.15732	0.0743526	2015-12-13 01:00:32
	0.579619	1.0617	5.35736	0.0572407	2015-12-13 01:04:51
	0.551356	1.07261	3.63707	0.0443887	2015-12-13 01:08:51
	0.494232	1.00105	2.63396	0.0441095	2015-12-13 01:12:51
0.000217536	0.544832	1.03785	2.35701	0.0392408	2015-12-13 01:16:51
	0.413041	0.94711	2.11494	0.0290652	2015-12-13 01:20:51
	0.514061	1.0355	2.49347	0.0362362	2015-12-13 01:24:51
	0.319741	1.13834	3.1487	0.0609871	2015-12-13 01:28:52
	0.437379	1.03935	4.05001	0.0622628	2015-12-13 01:32:52
	0.57278	1.08938	5.77618	0.115169	2015-12-13 01:36:52
		0.991125	4.73951	0.0877049	2015-12-13 01:40:52
	0.401706	1.05373	5.28294	0.0837872	2015-12-13 01:44:52
	0.371969	1.04545	4.57791	0.0799517	2015-12-13 01:48:52
	0.415145	1.2031	6.09354	0.0923746	2015-12-13 01:52:52
		1.0486	4.693	0.0750543	2015-12-13 01:56:52
0.00123402	0.238699	1.06285	4.95782	0.0951569	2015-12-13 02:00:52
	0.436969	1.10453	5.01771	0.102313	2015-12-13 02:04:53
	0.35418	1.26614	4.04098	0.0938181	2015-12-13 02:08:53
	0.543986	1.30815	3.42561	0.0795793	2015-12-13 02:12:53
	0.312869	1.19885	3.39764	0.0709753	2015-12-13 02:16:53
	0.323179	1.22972	2.69389	0.0479957	2015-12-13 02:20:53
	0.447789	1.37437	3.55042	0.0599961	2015-12-13 02:24:53
	0.150948	1.34674	3.78143	0.0546671	2015-12-13 02:28:53
	0.094469	1.141	3.38963	0.0507835	2015-12-13 02:32:53
	0.407201	1.31294	4.71388	0.0628777	2015-12-13 02:36:54
	0.540042	1.33732	4.55764	0.0629045	2015-12-13 02:40:54
	0.779394	1.39713	4.54455	0.0595209	2015-12-13 02:44:54
	0.262732	1.35804	4.02762	0.0500855	2015-12-13 02:48:54
	0.741629	1.39116	3.87606	0.057975	2015-12-13 02:52:54
	0.489627	1.4018	3.36197	0.0665383	2015-12-13 02:56:54
	0.401176	1.26499	4.6273	0.0883596	2015-12-13 03:00:54
	0.721627	1.23388	4.31315	0.108268	2015-12-13 03:04:54
	0.511301	1.14938	4.40616	0.0915055	2015-12-13 03:08:54
	0.397838	1.17191	4.78807	0.102283	2015-12-13 03:12:55
	0.567033	1.37575	4.89638	0.0982384	2015-12-13 03:16:55
	0.689268	1.19404	4.61184	0.0988786	2015-12-13 03:20:55
	0.357723	1.22941	4.60623	0.0908678	2015-12-13 03:24:55
	0.485395	1.15554	4.8413	0.0993855	2015-12-13 03:28:55
	0.32878	1.15772	4.23497	0.122112	2015-12-13 03:32:55
	0.503088	1.26404	5.10331	0.129262	2015-12-13 03:36:55
	0.467284	1.3739	4.10979	0.101105	2015-12-13 03:40:55
	0.341578	1.32358	5.08727	0.118717	2015-12-13 03:44:56
	0.572563	1.4186	5.03366	0.117163	2015-12-13 03:48:56
	0.310229	1.16865	3.02764	0.0934402	2015-12-13 03:52:56
					2015-12-13 03:56:56
	0.735766	1.46301	4.22804	0.124082	2015-12-13 04:00:56
	0.502033	1.3613	5.08272	0.128389	2015-12-13 04:05:05
	0.197178	1.46281	4.68685	0.0949478	2015-12-13 04:09:05
	0.326356	1.43383	4.71235	0.0851362	2015-12-13 04:13:05
	0.475895	1.31565	4.91638	0.0878478	2015-12-13 04:17:05
	0.280641	1.29194	4.96175	0.122261	2015-12-13 04:21:05
	0.841971	1.53982	4.89745	0.10161	2015-12-13 04:25:05
	0.214073	1.30916	4.27091	0.113885	2015-12-13 04:29:05
0.01959	0.824932	1.50612	3.65856	0.0879039	2015-12-13 04:33:05
	1.12235	1.77506	3.71854	0.0982756	2015-12-13 04:37:06
	0.616192	1.92248	3.04995	0.0584752	2015-12-13 04:41:06
	0.727829	2.05567	3.37085	0.0744701	2015-12-13 04:45:06
	0.772541	2.03094	3.17753	0.0749932	2015-12-13 04:49:06
	0.563072	1.77415	3.20806	0.069974	2015-12-13 04:53:06
	0.771647	1.65001	3.35898	0.100333	2015-12-13 04:57:06
	0.772462	1.5714	3.27189	0.0690393	2015-12-13 05:01:06
	0.650965	1.57264	3.24346	0.0963148	2015-12-13 05:05:06
	0.52199	1.76992	2.75214	0.0860403	2015-12-13 05:09:07
	0.819149	2.05469	2.60653	0.0836987	2015-12-13 05:13:07
	0.842506	2.09257	2.75247	0.0714458	2015-12-13 05:17:07
0.00270712	0.816825	2.05269	2.30748	0.0639491	2015-12-13 05:21:07
	1.04713	2.15221	2.74514	0.0700848	2015-12-13 05:25:07
	0.465335	1.99229	2.67767	0.087927	2015-12-13 05:29:07
	0.593174	1.78342	2.69602	0.0731102	2015-12-13 05:33:07
	0.604145	1.67598	3.08923	0.0778667	2015-12-13 05:37:07
	0.769493	1.62412	2.60157	0.0716734	2015-12-13 05:41:07
	0.850787	1.86922	2.43892	0.0715118	2015-12-13 05:45:08
	0.561473	1.81878	2.26872	0.0785579	2015-12-13 05:49:08
	0.766555	2.04602	2.22366	0.0690394	2015-12-13 05:53:08
	0.504723	2.00763	2.54006	0.0717942	2015-12-13 05:57:08
	0.834928	1.88318	3.05239	0.0570589	2015-12-13 06:01:08
	0.586944	1.51358	3.11262	0.058618	2015-12-13 06:05:08
	0.598826	1.52073	3.20468	0.0756606	2015-12-13 06:09:08
	0.948079	1.49534	3.40493	0.0925241	2015-12-13 06:13:08
	0.644114	1.41264	2.5004	0.0736438	2015-12-13 06:17:09
	0.273905	1.48237	3.11412	0.0940648	2015-12-13 06:21:09
	0.444642	1.52857	3.13054	0.0831986	2015-12-13 06:25:09
	0.292239	1.31226	2.2062	0.0889771	2015-12-13 06:29:09
	0.902185	1.4785	2.9108	0.0749655	2015-12-13 06:33:09
	0.593452	1.64608	2.86334	0.0962137	2015-12-13 06:37:09
	0.411695	1.62348	2.96351	0.092296	2015-12-13 06:41:09
	0.574109	1.82207	2.96516	0.0766027	2015-12-13 06:45:09
	0.801803	2.0952	2.86235	0.0605326	2015-12-13 06:49:09
0.0140687	0.719267	1.99511	2.56412	0.053546	2015-12-13 06:53:10
	0.632028	1.99858	2.51741	0.0679535	2015-12-13 06:57:10
	0.748489	2.10457	2.26487	0.0471024	2015-12-13 07:01:10
	1.23365	2.12307	2.71243	0.056916	2015-12-13 07:05:18
	0.941154	1.93236	2.10581	0.054171	2015-12-13 07:09:19
	0.807913	1.88782	1.71767	0.055602	2015-12-13 07:13:19
	0.924874	1.89772	1.79393	0.0416288	2015-12-13 07:17:19
	0.726369	1.83002	1.93498	0.0636971	2015-12-13 07:21:19
	0.557987	1.92922	1.6362	0.0594393	2015-12-13 07:25:19
0.00594587	0.458566	2.00735	2.23859	0.0676295	2015-12-13 07:29:19
	0.75127	1.891	2.03322	0.0530604	2015-12-13 07:33:19
	0.559003	1.85093	2.32337	0.0628153	2015-12-13 07:37:19
	0.539931	1.88904	1.88663	0.0542582	2015-12-13 07:41:19
	0.236763	1.92741	2.07002	0.0508091	2015-12-13 07:45:20
	0.526214	2.15391	2.62409	0.0705482	2015-12-13 07:49:20
	0.7331	2.1414	2.29641	0.0680883	2015-12-13 07:53:20
	0.809769	2.23981	2.01227	0.0601772	2015-12-13 07:57:20
	0.701217	2.00131	2.09747	0.0402163	2015-12-13 08:01:20
	0.908216	2.02961	2.24402	0.051104	2015-12-13 08:05:20
	0.778423	2.02322	2.23462	0.0513443	2015-12-13 08:09:20
	0.810925	2.00787	2.52714	0.0464596	2015-12-13 08:13:20
	0.534454	1.90787	2.44726	0.0522065	2015-12-13 08:17:21
	0.577258	2.03284	2.24089	0.0783626	2015-12-13 08:21:21
	0.563811	1.94321	1.91216	0.0549773	2015-12-13 08:25:21
	1.10162	1.94011	2.35638	0.0496601	2015-12-13 08:29:21
	0.882773	2.01126	1.7331	0.058247	2015-12-13 08:33:21
	0.624601	1.90388	1.86809	0.0427402	2015-12-13 08:37:21
	0.737661	1.92607	1.85305	0.0628839	2015-12-13 08:41:21
	0.536741	1.8649	2.02198	0.0605499	2015-12-13 08:45:21
	0.328094	1.91481	1.7106	0.0636721	2015-12-13 08:49:21
	0.266316	1.78119	1.58523	0.0435354	2015-12-13 08:53:22
	0.953443	1.79184	1.61741	0.0452053	2015-12-13 08:57:22
	0.667276	1.74609	1.97459	0.0744286	2015-12-13 09:01:22
	0.894434	1.75891	1.77692	0.0639173	2015-12-13 09:05:22
	0.966959	1.73667	1.68492	0.0662373	2015-12-13 09:09:22
	0.483145	1.78668	1.47458	0.0388533	2015-12-13 09:13:22
	0.61967	1.8633	1.38408	0.0319646	2015-12-13 09:17:22
	0.51935	1.9039	1.78505	0.0414298	2015-12-13 09:21:22
	0.434613	1.84255	1.6682	0.0355867	2015-12-13 09:25:23
	0.657682	1.86414	1.60968	0.047815	2015-12-13 09:29:23
	0.570804	2.06183	1.64868	0.0437587	2015-12-13 09:33:23
	0.547345	1.89203	1.70394	0.0396487	2015-12-13 09:37:23
	0.802028	2.13604	1.74544	0.0438657	2015-12-13 09:41:23
	0.720915	1.99785	1.56375	0.0375733	2015-12-13 09:45:23
	0.812022	1.96496	1.65851	0.0509317	2015-12-13 09:49:23
	1.03957	2.17845	1.98209	0.0453191	2015-12-13 09:53:23
	0.988829	1.59879	1.81248	0.0446913	2015-12-13 09:57:23
	0.671968	1.74354	1.54009	0.0553837	2015-12-13 10:01:24
	0.99997	1.45689	1.38483	0.0552624	2015-12-13 10:05:32
	0.716891	1.58965	1.64698	0.0637323	2015-12-13 10:09:32
	0.819781	1.77398	1.4759	0.0424863	2015-12-13 10:13:32
	0.739513	1.56937	1.70319	0.0502833	2015-12-13 10:17:33
	0.468664	1.36457	1.63715	0.041532	2015-12-13 10:21:33
	0.480187	1.37506	1.35436	0.0384936	2015-12-13 10:25:33
	0.461988	1.40858	1.36726	0.0532415	2015-12-13 10:29:33
	0.680647	1.32	1.11359	0.0364573	2015-12-13 10:33:33
	0.678922	1.35469	1.13245	0.0378822	2015-12-13 10:37:33
	0.317747	1.28757	1.37235	0.0369575	2015-12-13 10:41:33
	0.555154	1.25889	1.29965	0.0264866	2015-12-13 10:45:33
	0.401975	1.24332	0.947052	0.0441733	2015-12-13 10:49:34
	0.29078	1.24939	0.904335	0.0492736	2015-12-13 10:53:34
	0.343181	1.05174	1.23116	0.0455404	2015-12-13 10:57:34
	0.446039	1.14647	1.39534	0.0344202	2015-12-13 11:01:34
	0.475983	1.35343	1.51132	0.0413958	2015-12-13 11:05:34
	0.891656	1.32277	1.16364	0.0363096	2015-12-13 11:09:34
	0.405217	1.29028	1.37624	0.0492984	2015-12-13 11:13:34
	0.714145	1.3808	1.35894	0.0453343	2015-12-13 11:17:34
	0.727109	1.25986	1.00122	0.0366796	2015-12-13 11:21:34
	0.641788	1.43092	1.29488	0.0419246	2015-12-13 11:25:35
	0.626572	1.39219	1.20041	0.0377035	2015-12-13 11:29:35
	0.716567	1.30463	1.21987	0.0479513	2015-12-13 11:33:35
	0.649113	1.32094	1.06098	0.038967	2015-12-13 11:37:35
	0.769682	1.29738	1.15066	0.032027	2015-12-13 11:41:35
	0.484394	1.32475	1.40146	0.0202758	2015-12-13 11:45:35
	0.683717	1.2565	1.14679	0.0337018	2015-12-13 11:49:35
	0.461987	1.15885	1.01588	0.0426874	2015-12-13 11:53:35
	0.499462	1.27096	1.27631	0.042786	2015-12-13 11:57:35
	0.784594	1.22237	1.64138	0.0339113	2015-12-13 12:01:36
	0.24957	1.16099	1.27861	0.0268363	2015-12-13 12:05:36
	0.232254	1.19733	1.25659	0.0229141	2015-12-13 12:09:36
	0.617831	1.24258	1.40396	0.0263087	2015-12-13 12:13:36
	0.55115	1.15733	1.48585	0.0310182	2015-12-13 12:17:36
	0.319365	1.1917	1.4921	0.0422391	2015-12-13 12:21:36
0.00142409	1.01057	1.24351	1.40829	0.0477305	2015-12-13 12:25:36
	0.749567	1.27119	1.53791	0.0464718	2015-12-13 12:29:36
	0.659689	1.1369	1.31301	0.0336313	2015-12-13 12:33:37
	0.281541	1.21525	1.45768	0.0303144	2015-12-13 12:37:37
	0.247123	1.15077	1.46957	0.0250596	2015-12-13 12:41:37
	0.636043	1.27672	1.65516	0.0277827	2015-12-13 12:45:37
	0.567909	1.19595	1.39374	0.0288727	2015-12-13 12:49:37
	0.398171	1.29874	1.22907	0.0364664	2015-12-13 12:53:37
		1.24806	1.69713	0.0351773	2015-12-13 12:57:37
	0.279416	1.03163	1.38942	0.03154	2015-12-13 13:01:37
	0.354024	1.02289	1.24084	0.0405597	2015-12-13 13:05:46
	0.111697	1.10249	1.37075	0.053233	2015-12-13 13:09:46
		1.03424	1.13169	0.0435309	2015-12-13 13:13:46
	0.13828	1.03094	1.2348	0.0444714	2015-12-13 13:17:46
		1.04043	1.18694	0.0353699	2015-12-13 13:21:46
	0.190798	1.03899	1.21112	0.0207533	2015-12-13 13:25:47
	0.502937	0.935363	1.24993	0.0203046	2015-12-13 13:29:47
	0.614048	1.06073	1.47611	0.0428417	2015-12-13 13:33:47
0.00587996	0.471094	0.946071	1.30154	0.0388009	2015-12-13 13:37:47
	0.394894	0.95778	0.984273	0.0377213	2015-12-13 13:41:47
	0.624016	0.972286	1.26488	0.0413403	2015-12-13 13:45:47
0.0173186	0.477412	0.934627	1.26078	0.0259831	2015-12-13 13:49:47
0.00449522	0.66196	1.04439	1.54409	0.0294933	2015-12-13 13:53:47
	0.396803	0.931042	1.22833	0.0479498	2015-12-13 13:57:48
	0.569144	1.08186	1.52631	0.0420494	2015-12-13 14:01:48
	0.418178	1.1355	1.50601	0.0292321	2015-12-13 14:05:48
	0.442415	1.16612	1.21015	0.0208829	2015-12-13 14:09:48
	0.359847	1.14117	1.19344	0.042363	2015-12-13 14:13:48
	0.332891	1.16616	1.54585	0.037818	2015-12-13 14:17:48
	0.327319	1.21228	1.77059	0.0187633	2015-12-13 14:21:48
	0.245446	1.22211	1.76316	0.0360361	2015-12-13 14:25:48
	0.289685	1.12119	1.69896	0.0296524	2015-12-13 14:29:48
	0.416999	1.18441	1.32236	0.0429029	2015-12-13 14:33:49
	0.838975	1.1829	1.3059	0.0338855	2015-12-13 14:37:49
	0.838197	1.16707	1.38992	0.0426496	2015-12-13 14:41:49
	0.606761	1.18205	1.78039	0.0555708	2015-12-13 14:45:49
	0.391528	1.378	2.16601	0.0663657	2015-12-13 14:49:49
	0.68763	1.61533	3.00358	0.0803145	2015-12-13 14:53:49
	0.610082	1.59272	2.5664	0.0825133	2015-12-13 14:57:49
	0.487768	1.30397	1.76652	0.0617151	2015-12-13 15:01:49
	0.420763	1.33986	1.50833	0.0675804	2015-12-13 15:05:49
	0.890801	1.37701	2.06069	0.0656373	2015-12-13 15:09:50
	0.744115	1.39483	2.52761	0.0635975	2015-12-13 15:13:50
	0.567028	1.42922	2.50886	0.0816512	2015-12-13 15:17:50
	0.683201	1.58688	2.18028	0.081938	2015-12-13 15:21:50
	0.489521	1.59377	2.49568	0.0718433	2015-12-13 15:25:50
	0.495713	1.50127	2.48412	0.0784634	2015-12-13 15:29:50
	0.732351	1.44182	2.32269	0.0741224	2015-12-13 15:33:50
	0.728836	1.45091	2.22782	0.0704145	2015-12-13 15:37:50
	0.890288	1.43818	1.92207	0.0774714	2015-12-13 15:41:51
	0.872383	1.35924	1.89669	0.062239	2015-12-13 15:45:51
	0.506186	1.39974	1.93594	0.072254	2015-12-13 15:49:51
	0.697389	1.48803	2.18526	0.0738109	2015-12-13 15:53:51
	0.627027	1.37631	2.18818	0.0504643	2015-12-13 15:57:51
	0.819977	1.37225	2.40327	0.0596368	2015-12-13 16:01:51
	0.408385	1.58633	3.30362	0.0816187	2015-12-13 16:06:00
	0.741685	1.64775	3.09481	0.103297	2015-12-13 16:10:00
	0.890615	1.80646	3.0746	0.102672	2015-12-13 16:14:00
	0.911258	1.85863	3.40825	0.086406	2015-12-13 16:18:00
	0.539949	1.83262	3.67724	0.112414	2015-12-13 16:22:00
	0.716533	1.66568	3.31721	0.093929	2015-12-13 16:26:00
	0.587366	1.78694	3.35166	0.102712	2015-12-13 16:30:00
	0.543082	1.64208	2.85483	0.0998062	2015-12-13 16:34:01
	0.820535	1.45694	2.56447	0.0913442	2015-12-13 16:38:01
	0.812517	1.59007	3.15208	0.0993103	2015-12-13 16:42:01
	0.781567	1.53948	3.24853	0.0738438	2015-12-13 16:46:01
		1.35821	5.33817	0.0661633	2015-12-13 16:50:01
	1.10487	1.58803	3.21911	0.0857139	2015-12-13 16:54:01
	0.696469	1.60062	3.52067	0.107901	2015-12-13 16:58:01
	0.608909	1.6205	3.81521	0.100335	2015-12-13 17:02:01
	0.811608	1.66108	3.74324	0.0991138	2015-12-13 17:06:02
	0.951242	1.73858	3.87513	0.0987617	2015-12-13 17:10:02
	0.87004	1.66039	3.50122	0.108062	2015-12-13 17:14:02
	0.774195	1.62177	4.91405	0.123409	2015-12-13 17:18:02
	0.69398	1.6375	4.24699	0.102029	2015-12-13 17:22:02
	0.568308	1.60617	3.42957	0.125284	2015-12-13 17:26:02
	0.73979	1.52321	3.03338	0.0952658	2015-12-13 17:30:02
	0.699998	1.29361	2.50383	0.0658063	2015-12-13 17:34:02
	0.811453	1.19714	1.96602	0.0399992	2015-12-13 17:38:02
	0.314058	1.02832	2.19416	0.0528055	2015-12-13 17:42:03
	0.50736	1.21607	2.51692	0.0691679	2015-12-13 17:46:03
	0.490104	1.12912	2.10365	0.0715278	2015-12-13 17:50:03
	0.494481	0.989612	1.97355	0.0532977	2015-12-13 17:54:03
	0.27827	1.11084	2.45048	0.0506431	2015-12-13 17:58:03
	0.418716	0.915191	1.67431	0.0374415	2015-12-13 18:02:03
	0.119183	0.957544	1.64734	0.0452751	2015-12-13 18:06:03
	0.236445	0.986316	1.39655	0.0422275	2015-12-13 18:10:03
	0.756907	1.28057	3.18872	0.0776062	2015-12-13 18:14:04
	0.823953	1.37008	3.50681	0.075931	2015-12-13 18:18:04
	0.61832	1.23721	2.84754	0.0843171	2015-12-13 18:22:04
	0.703698	1.3211	2.85093	0.0669219	2015-12-13 18:26:04
	0.749147	1.39564	2.80408	0.0824328	2015-12-13 18:30:04
	0.849014	1.5268	2.74624	0.0737691	2015-12-13 18:34:04
	0.825061	1.60321	3.74862	0.0854688	2015-12-13 18:38:04
	0.41886	1.77194	4.17938	0.0825872	2015-12-13 18:42:04
	0.492754	1.6946	3.14024	0.0920315	2015-12-13 18:46:04
	0.752891	1.86598	3.21856	0.0953432	2015-12-13 18:50:05
	0.723326	1.71547	2.52596	0.0791693	2015-12-13 18:54:05
	0.597913	1.41003	1.91869	0.0400472	2015-12-13 18:58:05
	0.533926	1.47915	2.11396	0.0640255	2015-12-13 19:02:05
	0.498887	1.52479	2.42433	0.0744267	2015-12-13 19:06:14
	0.462181	1.5203	2.12935	0.082409	2015-12-13 19:10:14
	0.738904	1.63687	2.76683	0.0902127	2015-12-13 19:14:14
	0.756562	1.59205	2.70074	0.0883998	2015-12-13 19:18:14
	0.378401	1.44866	2.46623	0.0760904	2015-12-13 19:22:14
	0.354426	1.38078	2.22276	0.0765468	2015-12-13 19:26:14
	0.655846	1.70536	2.6268	0.0689795	2015-12-13 19:30:14
	0.577847	1.67768	2.35097	0.0535586	2015-12-13 19:34:14
0.00157925	0.209852	1.78889	2.85655	0.0588814	2015-12-13 19:38:15
	0.434864	2.14593	3.12937	0.0689246	2015-12-13 19:42:15
	0.581058	2.01728	2.63026	0.0673566	2015-12-13 19:46:15
	0.915815	2.05432	2.72866	0.0801821	2015-12-13 19:50:15
0.00100871	0.734875	2.02092	2.63266	0.0569457	2015-12-13 19:54:15
	0.87136	2.16779	2.83833	0.0844828	2015-12-13 19:58:15
	0.956676	2.23238	2.88342	0.0813514	2015-12-13 20:02:15
	0.665919	2.02209	3.02046	0.051907	2015-12-13 20:06:15
	0.64157	1.65421	2.20717	0.0598614	2015-12-13 20:10:15
	0.66849	1.76398	3.16552	0.0718721	2015-12-13 20:14:16
	0.540392	1.6009	2.29796	0.063154	2015-12-13 20:18:16
	0.771896	1.84076	3.64948	0.0691244	2015-12-13 20:22:16
	0.497639	1.45589	2.33614	0.0553954	2015-12-13 20:26:16
	0.591759	1.63606	2.95438	0.0649608	2015-12-13 20:30:16
	0.45251	1.58115	2.52564	0.0625503	2015-12-13 20:34:16
	0.971149	1.74395	3.32035	0.0706579	2015-12-13 20:38:16
	0.981715	1.78413	3.42851	0.0704783	2015-12-13 20:42:16
	1.1041	2.01032	4.67531	0.0734689	2015-12-13 20:46:16
	0.552473	1.59419	3.42029	0.0722284	2015-12-13 20:50:17
	1.05114	1.80538	4.06527	0.0767752	2015-12-13 20:54:17
	0.224088	1.5541	3.46316	0.0704662	2015-12-13 20:58:17
	0.521875	1.75621	3.84294	0.0767611	2015-12-13 21:02:17
	0.809275	1.80601	3.69024	0.0648291	2015-12-13 21:06:17
	0.852692	1.9296	4.0637	0.0575751	2015-12-13 21:10:17
	0.574489	1.89745	3.61644	0.0715397	2015-12-13 21:14:17
	0.967639	2.11603	4.04972	0.0939615	2015-12-13 21:18:17
	0.478696	1.94886	3.76942	0.0643041	2015-12-13 21:22:18
	0.948717	2.08014	3.71579	0.0617291	2015-12-13 21:26:18
	1.04358	2.2652	4.27247	0.0829905	2015-12-13 21:30:18
	1.01226	2.2065	4.21166	0.0763168	2015-12-13 21:34:18
	0.812773	2.14855	3.59111	0.0899197	2015-12-13 21:38:18
	0.945544	2.07909	3.17672	0.0794909	2015-12-13 21:42:18
	1.20809	2.34517	3.18018	0.0771628	2015-12-13 21:46:18
	0.89043	2.1951	3.14297	0.055938	2015-12-13 21:50:18
	1.05621	2.30086	3.63382	0.0712953	2015-12-13 21:54:18
	1.51067	2.54383	3.30222	0.0755933	2015-12-13 21:58:19
	1.50709	2.89384	3.91951	0.0888537	2015-12-13 22:02:19
	1.1058	2.96164	4.19818	0.0866464	2015-12-13 22:06:27
	0.702565	2.95123	4.91924	0.106282	2015-12-13 22:10:28
	0.94804	2.57181	3.98745	0.0946965	2015-12-13 22:14:28
	1.16736	2.44701	4.42601	0.090619	2015-12-13 22:18:28
	0.971828	2.50141	4.67161	0.120875	2015-12-13 22:22:28
	1.46405	2.52102	5.5898	0.115132	2015-12-13 22:26:28
	1.20241	2.31629	4.66933	0.112556	2015-12-13 22:30:28
	0.558241	2.91362	4.11976	0.106317	2015-12-13 22:34:28
	1.21415	3.35469	4.5049	0.130827	2015-12-13 22:38:28
	1.48591	3.55487	4.29668	0.100458	2015-12-13 22:42:28
	1.50135	3.60834	3.97869	0.111233	2015-12-13 22:46:29
	1.26902	3.59176	4.15084	0.0989727	2015-12-13 22:50:29
	1.4259	4.08193	4.09649	0.0985565	2015-12-13 22:54:29
	1.26386	3.59202	3.99615	0.113479	2015-12-13 22:58:29
	1.2705	3.40399	3.60484	0.100148	2015-12-13 23:02:29
	1.00227	3.07732	2.67899	0.101188	2015-12-13 23:06:29
	1.28891	3.04263	3.3998	0.0909103	2015-12-13 23:10:29
	1.14238	3.22032	3.54761	0.0822843	2015-12-13 23:14:29
	1.41667	3.15004	3.42339	0.131522	2015-12-13 23:18:30
	1.13354	2.90072	3.07543	0.0830766	2015-12-13 23:22:30
	1.14974	3.11055	3.23827	0.0810076	2015-12-13 23:26:30
	0.994785	2.90163	3.10256	0.085321	2015-12-13 23:30:30
	1.3062	3.31768	3.47613	0.0622198	2015-12-13 23:34:30
	1.05278	3.53948	3.61246	0.0799965	2015-12-13 23:38:30
	0.993928	3.57984	3.58651	0.0812937	2015-12-13 23:42:30
	1.25587	3.84553	3.70579	0.102938	2015-12-13 23:46:30
	1.64162	3.87708	3.89362	0.117554	2015-12-13 23:50:30
	1.71728	4.05454	5.10169	0.132118	2015-12-13 23:54:31
	1.74045	4.28969	4.97669	0.148361	2015-12-13 23:58:31
	1.37556	3.87939	4.47893	0.134026	2015-12-14 00:02:31
	1.22605	3.92242	4.79131	0.1365	2015-12-14 00:06:31
	1.28772	3.57024	4.66589	0.138557	2015-12-14 00:10:31
	1.62039	3.66872	4.45594	0.121451	2015-12-14 00:14:31
	1.74801	3.79697	4.31638	0.141658	2015-12-14 00:18:31
	1.58903	3.56077	4.28822	0.118769	2015-12-14 00:22:31
	1.68449	3.7979	4.01235	0.104597	2015-12-14 00:26:32
	1.17684	3.53487	3.73809	0.117037	2015-12-14 00:30:32
	1.6103	3.97459	4.29849	0.123237	2015-12-14 00:34:32
	1.23836	4.09113	4.10514	0.122109	2015-12-14 00:38:32
	1.41074	3.88765	4.08784	0.110062	2015-12-14 00:42:32
	1.5826	4.16172	4.29509	0.129792	2015-12-14 00:46:32
	1.26886	3.83714	3.73542	0.113791	2015-12-14 00:50:32
	1.45125	4.03229	4.83833	0.114267	2015-12-14 00:54:32
	1.4131	3.89458	4.81322	0.161492	2015-12-14 00:58:32
	1.05411	3.70795	4.99586	0.164563	2015-12-14 01:02:33
	1.5604	3.57915	5.02209	0.146925	2015-12-14 01:06:41
	1.61267	3.63592	5.13981	0.190113	2015-12-14 01:10:41
	1.12431	3.53703	5.79494	0.182355	2015-12-14 01:14:41
	1.64493	3.88463	4.93967	0.169157	2015-12-14 01:18:42
	1.55735	4.03378	4.56829	0.143401	2015-12-14 01:22:42
	1.62487	3.94638	3.9477	0.132182	2015-12-14 01:26:42
	1.03882	3.77563	3.47295	0.109226	2015-12-14 01:30:42
	1.48375	3.96578	3.89113	0.0913713	2015-12-14 01:34:42
	1.34432	4.01602	3.77163	0.094652	2015-12-14 01:38:42
	1.40976	3.39615	3.47527	0.0925093	2015-12-14 01:42:42
	1.27449	3.52722	3.4871	0.0750341	2015-12-14 01:46:42
	1.22013	3.4503	2.98651	0.0847684	2015-12-14 01:50:43
0.018694	1.69712	3.55223	3.89167	0.0740484	2015-12-14 01:54:43
0.00456903	1.30253	3.2898	3.45266	0.082938	2015-12-14 01:58:43
	1.75118	3.57578	3.67213	0.0776972	2015-12-14 02:02:43
	1.51589	3.70194	3.89946	0.0855588	2015-12-14 02:06:43
	1.2316	3.51401	3.69562	0.0978745	2015-12-14 02:10:43
	1.6521	3.45477	4.0946	0.103529	2015-12-14 02:14:43
	1.40223	3.3256	4.27084	0.143948	2015-12-14 02:18:43
	1.11775	3.14221	4.42902	0.14095	2015-12-14 02:22:43
	1.17248	3.33978	4.79669	0.15198	2015-12-14 02:26:44
	1.21574	3.08127	4.24964	0.131666	2015-12-14 02:30:44
	1.10176	3.16371	4.30096	0.120859	2015-12-14 02:34:44
	1.35545	3.43502	4.08512	0.123475	2015-12-14 02:38:44
	1.04414	3.35903	3.86896	0.0933336	2015-12-14 02:42:44
	1.76948	3.48034	4.26235	0.115299	2015-12-14 02:46:44
	1.4619	3.59564	4.37799	0.122191	2015-12-14 02:50:44
	1.14315	3.53859	4.38475	0.1425	2015-12-14 02:54:44
	1.37731	3.3687	4.98193	0.138644	2015-12-14 02:58:44
	1.08555	3.32553	5.02264	0.142628	2015-12-14 03:02:45
	1.14378	3.28487	4.634	0.143318	2015-12-14 03:06:45
	1.40211	3.21119	4.63221	0.144499	2015-12-14 03:10:45
	1.10387	2.94928	5.19168	0.215774	2015-12-14 03:14:45
	1.79371	3.06391	5.66252	0.322939	2015-12-14 03:18:45
	1.45989	2.86651	5.31569	0.286892	2015-12-14 03:22:45
	1.50755	2.83522	5.4643	0.312814	2015-12-14 03:26:45
	1.55764	2.94143	5.25817	0.307145	2015-12-14 03:30:45
	1.27135	2.84509	5.01048	0.302172	2015-12-14 03:34:46
	1.47471	2.9964	5.52023	0.289942	2015-12-14 03:38:46
	1.32938	2.78744	4.81154	0.257171	2015-12-14 03:42:46
	1.29561	2.87431	5.11167	0.28859	2015-12-14 03:46:46
	1.47528	2.88108	5.3683	0.32304	2015-12-14 03:50:46
	1.34843	2.79432	5.10088	0.290304	2015-12-14 03:54:46
	1.31804	2.72354	5.19803	0.235909	2015-12-14 03:58:46
	1.33761	2.73744	4.79671	0.280444	2015-12-14 04:02:46
	1.40568	2.58433	4.89672	0.254301	2015-12-14 04:06:55
	1.30762	2.74411	5.41522	0.281438	2015-12-14 04:10:55
	1.04656	2.71546	4.944	0.286872	2015-12-14 04:14:55
	1.2497	2.73873	4.84069	0.246396	2015-12-14 04:18:55
	0.950611	2.61141	5.16355	0.255772	2015-12-14 04:22:55
	1.02389	2.76787	4.77166	0.245911	2015-12-14 04:26:56
	1.38023	2.85754	5.14832	0.235144	2015-12-14 04:30:56
	1.32317	2.86987	4.90156	0.233081	2015-12-14 04:34:56
	1.482	2.83617	4.82672	0.232174	2015-12-14 04:38:56
	1.33518	2.81043	4.70147	0.223324	2015-12-14 04:42:56
	1.18931	2.5995	4.47467	0.207127	2015-12-14 04:46:56
	1.09785	2.84701	4.78627	0.198972	2015-12-14 04:50:56
0.00337615	1.07788	2.59232	4.65158	0.20275	2015-12-14 04:54:56
	0.906417	2.69711	4.64559	0.207364	2015-12-14 04:58:57
	1.30095	2.71257	4.10711	0.194444	2015-12-14 05:02:57
	1.45817	2.76799	4.28689	0.205369	2015-12-14 05:06:57
	1.40025	2.71294	4.37524	0.188935	2015-12-14 05:10:57
	1.15894	2.7058	4.23221	0.190769	2015-12-14 05:14:57
	1.10124	2.91032	4.6056	0.192578	2015-12-14 05:18:57
	0.899857	2.1311	3.16422	0.153757	2015-12-14 05:22:57
					2015-12-14 05:26:57
	1.27251	2.93504	4.38357	0.203215	2015-12-14 05:30:57
	1.08973	2.76523	4.17875	0.226471	2015-12-14 05:34:58
	1.2089	3.02342	4.55906	0.214648	2015-12-14 05:38:58
	1.3127	2.94987	4.59179	0.222677	2015-12-14 05:42:58
	1.2456	2.88032	4.54397	0.190633	2015-12-14 05:46:58
	1.00162	2.8855	4.71573	0.180793	2015-12-14 05:50:58
	1.17833	2.72762	3.93754	0.175663	2015-12-14 05:54:58
	1.38009	2.93975	4.55677	0.222358	2015-12-14 05:58:58
	1.01703	2.73537	4.00239	0.212694	2015-12-14 06:02:58
	1.17555	2.78538	4.07582	0.221353	2015-12-14 06:06:59
	1.0908	2.84011	4.16144	0.189015	2015-12-14 06:10:59
	1.11126	2.8083	4.0203	0.177779	2015-12-14 06:14:59
	1.45951	2.84607	4.24349	0.183598	2015-12-14 06:18:59
	1.44911	2.80007	4.1867	0.191755	2015-12-14 06:22:59
	1.12701	2.76583	4.33006	0.211268	2015-12-14 06:26:59
	1.41945	2.8683	4.05035	0.221179	2015-12-14 06:30:59
	1.27568	2.81309	3.79152	0.231822	2015-12-14 06:34:59
	1.43061	2.79597	4.2719	0.183531	2015-12-14 06:38:59
	1.64629	2.75192	4.0979	0.185166	2015-12-14 06:43:00
	1.30411	2.61247	3.79312	0.183435	2015-12-14 06:47:00
	1.06144	2.60629	3.65033	0.175376	2015-12-14 06:51:00
	1.12714	2.70072	3.81963	0.179334	2015-12-14 06:55:00
	0.9528	2.81127	4.22104	0.179061	2015-12-14 06:59:00
	1.45971	2.96628	4.34205	0.225462	2015-12-14 07:03:00
	1.42657	2.84871	4.32177	0.193991	2015-12-14 07:07:09
	1.08864	2.77069	3.99085	0.240979	2015-12-14 07:11:09
	1.28163	2.57201	3.84581	0.192623	2015-12-14 07:15:09
0.00451353	1.40409	2.56619	3.96146	0.242678	2015-12-14 07:19:09
	1.28463	2.71734	3.85962	0.259695	2015-12-14 07:23:09
	1.25749	2.67043	4.45784	0.24013	2015-12-14 07:27:09
	1.81528	2.62506	4.29349	0.327908	2015-12-14 07:31:10
	1.39943	2.39299	3.85656	0.287215	2015-12-14 07:35:10
	1.36614	2.41166	4.09601	0.283503	2015-12-14 07:39:10
	1.67637	2.66049	4.13856	0.356216	2015-12-14 07:43:10
	1.4223	2.59714	4.68168	0.314235	2015-12-14 07:47:10
0.00139268	1.63504	2.78803	4.88614	0.372607	2015-12-14 07:51:10
	1.33195	2.44159	3.92378	0.325561	2015-12-14 07:55:10
	2.18038	2.86463	5.17393	0.419427	2015-12-14 07:59:10
	1.22914	2.28245	3.8866	0.309941	2015-12-14 08:03:10
	1.53978	2.80163	5.24404	0.388378	2015-12-14 08:07:11
	1.02163	2.30653	3.78175	0.310522	2015-12-14 08:11:11
	1.8141	2.67564	4.94293	0.43105	2015-12-14 08:15:11
	1.5639	2.45361	4.70953	0.401388	2015-12-14 08:19:11
	1.68849	2.77671	4.98055	0.459034	2015-12-14 08:23:11
	1.70032	2.57324	4.77284	0.365105	2015-12-14 08:27:11
	2.05424	2.59884	4.82335	0.430785	2015-12-14 08:31:11
	1.42091	2.48852	4.64773	0.423269	2015-12-14 08:35:11
	1.34724	2.57531	4.6929	0.4393	2015-12-14 08:39:12
	1.80262	2.57031	5.02096	0.464969	2015-12-14 08:43:12
	1.62497	2.56103	4.88039	0.413967	2015-12-14 08:47:12
	1.31709	2.57124	4.78419	0.414257	2015-12-14 08:51:12
	1.53269	2.52849	4.57616	0.376962	2015-12-14 08:55:12
	1.58582	2.56654	4.91683	0.419085	2015-12-14 08:59:12
	1.46822	2.47792	4.83603	0.389964	2015-12-14 09:03:12
	1.72141	2.4591	4.68565	0.410398	2015-12-14 09:07:12
	1.35762	2.33994	4.21689	0.371688	2015-12-14 09:11:12
0.00244575	1.75674	2.51599	4.60973	0.391057	2015-12-14 09:15:13
	1.50067	2.56288	4.80098	0.403253	2015-12-14 09:19:13
	1.55881	2.42092	4.77965	0.397833	2015-12-14 09:23:13
	1.64632	2.51612	4.85053	0.411589	2015-12-14 09:27:13
	1.62132	2.45749	4.71242	0.394722	2015-12-14 09:31:13
	1.46451	2.51783	4.81483	0.397606	2015-12-14 09:35:13
	1.21847	2.47089	4.72636	0.393478	2015-12-14 09:39:13
	1.50133	2.493	4.93639	0.346377	2015-12-14 09:43:13
	1.13899	2.55784	4.76603	0.362571	2015-12-14 09:47:14
	1.29914	2.51659	4.61099	0.39067	2015-12-14 09:51:14
	1.94354	2.51968	4.86478	0.413838	2015-12-14 09:55:14
	1.54178	2.49912	5.04535	0.39948	2015-12-14 09:59:14
	1.66681	2.46193	4.77644	0.396549	2015-12-14 10:03:14
	1.37235	2.53406	4.75268	0.417274	2015-12-14 10:07:23
	1.30041	2.46002	4.82629	0.386151	2015-12-14 10:11:23
	1.55655	2.62705	4.74498	0.395186	2015-12-14 10:15:23
	1.71031	2.65387	5.03511	0.460774	2015-12-14 10:19:23
	1.61036	2.71762	5.09125	0.427738	2015-12-14 10:23:23
	1.80835	2.97832	5.46601	0.457086	2015-12-14 10:27:23
	1.38775	2.7285	4.98386	0.375827	2015-12-14 10:31:23
	1.74762	2.74766	4.8862	0.352437	2015-12-14 10:35:23
	1.8524	2.92175	5.33327	0.367398	2015-12-14 10:39:24
	1.88266	2.92157	5.25367	0.36055	2015-12-14 10:43:24
	2.16572	2.86217	5.40632	0.324173	2015-12-14 10:47:24
	1.72169	2.95371	5.54305	0.378772	2015-12-14 10:51:24
	1.26302	2.95275	5.04502	0.404208	2015-12-14 10:55:24
	1.26392	3.18645	5.58659	0.40467	2015-12-14 10:59:24
	2.29244	3.4879	7.13668	0.435071	2015-12-14 11:03:24
	1.8177	3.10869	6.03159	0.359764	2015-12-14 11:07:24
	1.84219	2.82686	5.38042	0.368412	2015-12-14 11:11:25
	1.767	2.79491	4.97016	0.351606	2015-12-14 11:15:25
	1.54823	2.8395	4.99233	0.344993	2015-12-14 11:19:25
	1.39613	2.81117	5.19592	0.367215	2015-12-14 11:23:25
	1.80939	2.87589	5.346	0.395126	2015-12-14 11:27:25
	1.86247	2.94455	5.27404	0.39135	2015-12-14 11:31:25
	1.62107	2.90506	5.43057	0.391913	2015-12-14 11:35:25
	1.67863	2.94993	5.4457	0.343907	2015-12-14 11:39:25
	1.68481	2.77008	4.56547	0.366803	2015-12-14 11:43:25
	2.0758	2.95264	5.04803	0.381313	2015-12-14 11:47:26
	1.26505	2.76726	4.84035	0.330295	2015-12-14 11:51:26
	1.38896	2.76846	4.73515	0.344653	2015-12-14 11:55:26
	1.38423	2.75055	4.77406	0.346752	2015-12-14 11:59:26
	1.8093	2.92639	4.86532	0.368013	2015-12-14 12:03:26
	1.66358	2.77504	4.48402	0.312889	2015-12-14 12:07:26
	1.7941	2.92253	4.80864	0.363753	2015-12-14 12:11:26
	1.64787	2.83264	4.61355	0.312023	2015-12-14 12:15:26
	1.62126	2.64329	4.66471	0.359311	2015-12-14 12:19:26
	1.68543	2.67277	4.52189	0.410968	2015-12-14 12:23:27
	1.41797	2.87934	4.95359	0.384489	2015-12-14 12:27:27
	1.43673	2.72217	4.80018	0.366289	2015-12-14 12:31:27
	1.8164	2.7778	4.61849	0.377382	2015-12-14 12:35:27
	1.5622	2.87969	4.67018	0.357308	2015-12-14 12:39:27
	1.7046	2.90137	4.72643	0.367118	2015-12-14 12:43:27
	1.64878	2.95493	4.44648	0.357302	2015-12-14 12:47:27
	1.60391	2.94012	4.15723	0.35733	2015-12-14 12:51:27
	1.51921	2.89253	4.6273	0.345455	2015-12-14 12:55:28
	1.47273	2.90722	4.51035	0.330638	2015-12-14 12:59:28
	1.26937	2.29385	3.71519	0.30889	2015-12-14 13:03:28
	1.27383	2.20566	3.71787	0.340539	2015-12-14 13:07:36
	1.13836	2.3442	3.83703	0.354923	2015-12-14 13:11:37
	1.63954	2.44002	4.16714	0.368221	2015-12-14 13:15:37
	1.3016	2.44509	4.08209	0.363829	2015-12-14 13:19:37
	1.61407	2.42509	4.11214	0.351067	2015-12-14 13:23:37
	1.86279	2.45785	4.47299	0.399366	2015-12-14 13:27:37
	1.55322	2.37179	4.36168	0.434679	2015-12-14 13:31:37
	1.74136	2.53939	5.00825	0.439551	2015-12-14 13:35:37
	1.45145	2.28718	4.13048	0.379874	2015-12-14 13:39:37
	1.46897	2.51679	4.59205	0.388821	2015-12-14 13:43:37
	1.27268	2.23518	4.06469	0.348594	2015-12-14 13:47:38
	1.55167	2.4672	4.2072	0.330793	2015-12-14 13:51:38
	1.1985	2.37017	3.8476	0.293231	2015-12-14 13:55:38
	1.4565	2.55082	3.97125	0.350627	2015-12-14 13:59:38
	1.1634	2.41307	4.07299	0.317851	2015-12-14 14:03:38
	1.35975	2.52306	4.0487	0.363552	2015-12-14 14:07:38
	1.5445	2.57261	4.29952	0.348171	2015-12-14 14:11:38
	1.59441	2.44858	4.3104	0.316285	2015-12-14 14:15:38
	1.50868	2.33055	4.11465	0.338242	2015-12-14 14:19:38
	1.69694	2.39242	4.06951	0.355336	2015-12-14 14:23:39
	1.53421	2.30986	4.16948	0.368551	2015-12-14 14:27:39
	1.80379	2.38035	4.52856	0.357968	2015-12-14 14:31:39
	1.56152	2.3514	4.21438	0.389675	2015-12-14 14:35:39
	1.4806	2.38526	4.61255	0.416578	2015-12-14 14:39:39
	1.33713	2.322	4.6558	0.403045	2015-12-14 14:43:39
	1.34969	2.27046	4.86013	0.422052	2015-12-14 14:47:39
	1.28899	2.3472	4.64764	0.402331	2015-12-14 14:51:39
	1.35494	2.27799	4.53174	0.4019	2015-12-14 14:55:40
	1.59885	2.33693	4.59366	0.456247	2015-12-14 14:59:40
	1.34472	2.26795	4.772	0.439759	2015-12-14 15:03:40
	1.48169	2.31668	4.60162	0.446901	2015-12-14 15:07:40
	1.63219	2.30828	5.05022	0.490594	2015-12-14 15:11:40
	1.73182	2.48708	5.32651	0.52748	2015-12-14 15:15:40
	1.54571	2.34096	4.8734	0.511788	2015-12-14 15:19:40
	1.3764	2.31065	4.70687	0.48804	2015-12-14 15:23:40
	1.2128	2.40372	5.06644	0.517888	2015-12-14 15:27:40
	1.70102	2.54204	4.78404	0.545763	2015-12-14 15:31:41
	1.68296	2.31275	4.51439	0.501319	2015-12-14 15:35:41
	1.58832	2.31926	4.43365	0.519904	2015-12-14 15:39:41
	1.88203	2.35134	4.52088	0.493535	2015-12-14 15:43:41
	1.80773	2.32051	5.19564	0.541543	2015-12-14 15:47:41
	1.28409	2.02985	4.44008	0.541549	2015-12-14 15:51:41
	2.04451	2.3569	5.22528	0.552969	2015-12-14 15:55:41
	2.03242	2.52595	5.08659	0.546888	2015-12-14 15:59:41
	1.79438	2.67655	5.17698	0.591807	2015-12-14 16:03:42
	1.86574	2.58777	4.81472	0.641663	2015-12-14 16:07:50
	1.62693	2.74418	5.66868	0.609816	2015-12-14 16:11:50
	1.8694	2.71249	5.73102	0.578295	2015-12-14 16:15:50
	1.5186	2.48405	5.52053	0.588257	2015-12-14 16:19:51
	1.46704	2.47762	4.86648	0.608601	2015-12-14 16:23:51
	2.18968	2.70617	5.37868	0.697862	2015-12-14 16:27:51
	2.35094	2.6551	5.10633	0.702383	2015-12-14 16:31:51
	2.39429	2.48933	5.38047	0.660732	2015-12-14 16:35:51
	2.00267	2.57408	5.16146	0.600836	2015-12-14 16:39:51
	1.88601	2.69311	5.52345	0.693176	2015-12-14 16:43:51
	1.8474	2.57044	5.45433	0.651494	2015-12-14 16:47:51
	1.75697	2.38453	5.56533	0.663316	2015-12-14 16:51:51
	1.87432	2.51377	6.08545	0.74018	2015-12-14 16:55:52
	1.91232	2.52767	5.68415	0.72418	2015-12-14 16:59:52
	1.85126	2.58919	5.43018	0.713925	2015-12-14 17:03:52
	0.913126	2.08645	3.50663	0.378599	2015-12-14 17:07:52
	1.06301	2.21234	5.15824	0.457664	2015-12-14 17:11:52
	1.58837	2.40239	4.78501	0.577145	2015-12-14 17:15:52
	1.22532	2.20154	4.7194	0.580705	2015-12-14 17:19:52
	1.5032	2.20233	4.74594	0.493038	2015-12-14 17:23:52
	1.41957	2.37513	4.84926	0.545547	2015-12-14 17:27:53
	1.44905	2.39511	5.47749	0.563914	2015-12-14 17:31:53
	1.40313	2.09365	3.94811	0.465408	2015-12-14 17:35:53
	1.74405	2.20875	5.4261	0.51365	2015-12-14 17:39:53
	1.83706	2.34883	4.77441	0.474379	2015-12-14 17:43:53
0.00500837	1.55311	2.10372	4.22141	0.428566	2015-12-14 17:47:53
	1.65547	2.19485	4.93075	0.495915	2015-12-14 17:51:53
	0.964314	2.07494	4.21152	0.406413	2015-12-14 17:55:53
	1.22224	1.99002	4.31188	0.375526	2015-12-14 17:59:53
	1.49215	1.98841	4.19108	0.41723	2015-12-14 18:03:54
	1.12555	1.97433	4.56349	0.372465	2015-12-14 18:07:54
	0.804546	1.86417	3.77744	0.33989	2015-12-14 18:11:54
	0.884129	1.63375	3.38701	0.330435	2015-12-14 18:15:54
	1.19623	1.80498	4.09807	0.331497	2015-12-14 18:19:54
	1.51506	1.86129	3.64452	0.386971	2015-12-14 18:23:54
	1.28176	1.77223	3.86072	0.386984	2015-12-14 18:27:54
	1.17729	1.78663	3.81202	0.36809	2015-12-14 18:31:54
	1.05584	1.89713	4.27017	0.357784	2015-12-14 18:35:54
	0.766434	1.73502	3.9111	0.32425	2015-12-14 18:39:55
	1.02551	1.74895	3.65408	0.344025	2015-12-14 18:43:55
	1.21216	1.86143	4.48983	0.377516	2015-12-14 18:47:55
	1.3005	1.84129	3.77435	0.370471	2015-12-14 18:51:55
	1.40448	1.91791	3.864	0.37446	2015-12-14 18:55:55
	1.67244	1.8583	3.89628	0.388218	2015-12-14 18:59:55
	1.12356	1.6299	3.39855	0.383059	2015-12-14 19:03:55
	1.45853	1.66115	3.77747	0.416244	2015-12-14 19:08:04
	0.933342	1.80281	3.80919	0.413672	2015-12-14 19:12:04
	1.45068	1.93028	4.18652	0.500043	2015-12-14 19:16:04
	1.47897	1.99931	4.66674	0.471804	2015-12-14 19:20:04
	1.33656	1.83671	4.53925	0.437407	2015-12-14 19:24:04
	1.59193	1.82751	4.78996	0.493312	2015-12-14 19:28:05
	1.1524	1.79699	4.22526	0.423635	2015-12-14 19:32:05
	1.1524	1.82506	4.5502	0.436799	2015-12-14 19:36:05
	1.08628	1.77343	3.99734	0.408029	2015-12-14 19:40:05
	0.922968	1.59252	3.70718	0.417337	2015-12-14 19:44:05
	1.10823	1.74056	4.22398	0.44036	2015-12-14 19:48:05
	1.05509	1.75114	4.44535	0.459931	2015-12-14 19:52:05
	1.08863	1.74732	5.21826	0.434442	2015-12-14 19:56:05
	1.22688	1.71321	4.14641	0.496576	2015-12-14 20:00:05
	1.11218	1.78644	3.91077	0.476494	2015-12-14 20:04:06
	1.40785	1.80542	4.08413	0.456526	2015-12-14 20:08:06
	1.04411	1.63255	4.49741	0.431162	2015-12-14 20:12:06
	1.22768	1.71045	4.93759	0.5083	2015-12-14 20:16:06
	1.31458	1.58507	4.20453	0.462238	2015-12-14 20:20:06
	1.09536	1.66029	3.88945	0.435291	2015-12-14 20:24:06
	1.46955	1.82207	4.77965	0.491192	2015-12-14 20:28:06
	1.12783	1.62111	4.23834	0.422034	2015-12-14 20:32:06
	1.06452	1.74629	3.79452	0.443256	2015-12-14 20:36:07
	1.18006	1.56174	3.7987	0.434371	2015-12-14 20:40:07
	1.42645	1.67457	3.95634	0.42777	2015-12-14 20:44:07
	1.24104	1.79741	4.45527	0.486319	2015-12-14 20:48:07
	1.09285	1.6237	4.18876	0.441047	2015-12-14 20:52:07
	1.35538	1.76063	4.2313	0.496779	2015-12-14 20:56:07
	1.20008	1.83053	4.25888	0.546615	2015-12-14 21:00:07
	1.26561	1.76812	4.4978	0.478101	2015-12-14 21:04:07
	1.68167	1.83474	4.72438	0.536307	2015-12-14 21:08:07
	1.30781	1.87733	4.44495	0.48485	2015-12-14 21:12:08
	1.26783	1.972	5.0298	0.524103	2015-12-14 21:16:08
	1.24068	1.97344	4.86188	0.522156	2015-12-14 21:20:08
	1.19502	2.01225	4.82392	0.530363	2015-12-14 21:24:08
	1.37281	1.86149	4.76662	0.46135	2015-12-14 21:28:08
	1.4836	1.98259	4.81049	0.526642	2015-12-14 21:32:08
	1.57306	1.85633	4.57205	0.525064	2015-12-14 21:36:08
	1.44894	2.00389	4.61934	0.534952	2015-12-14 21:40:08
	1.24191	1.87963	4.82864	0.503911	2015-12-14 21:44:09
	1.30015	1.98936	5.07114	0.555274	2015-12-14 21:48:09
	1.56349	2.04823	5.09083	0.579485	2015-12-14 21:52:09
	1.44628	2.0053	5.18194	0.564024	2015-12-14 21:56:09
	1.47145	2.06309	4.98294	0.625341	2015-12-14 22:00:09
	1.4522	1.95028	4.87925	0.527016	2015-12-14 22:04:09
	1.85512	2.0246	5.34386	0.626641	2015-12-14 22:08:18
	1.60605	1.95514	4.45192	0.570209	2015-12-14 22:12:18
	1.34949	1.93888	4.76296	0.49655	2015-12-14 22:16:18
	1.2707	1.82911	4.57818	0.474494	2015-12-14 22:20:18
	1.54047	1.82688	4.63401	0.485363	2015-12-14 22:24:18
	1.66685	1.81119	4.4173	0.481007	2015-12-14 22:28:18
	1.86788	1.88651	4.36	0.441511	2015-12-14 22:32:18
	1.40325	1.7634	4.66242	0.437127	2015-12-14 22:36:19
	1.19259	1.83552	4.66745	0.459508	2015-12-14 22:40:19
	1.16882	1.71973	4.39562	0.424403	2015-12-14 22:44:19
	1.51706	1.93051	4.59369	0.538569	2015-12-14 22:48:19
	1.54613	1.80006	4.34605	0.530443	2015-12-14 22:52:19
	1.58163	1.95746	4.97961	0.547443	2015-12-14 22:56:19
	1.19875	1.80275	4.39523	0.479802	2015-12-14 23:00:19
	1.20501	1.77045	4.53657	0.454447	2015-12-14 23:04:19
	1.1896	1.83229	4.78435	0.506104	2015-12-14 23:08:20
	1.35859	1.78273	4.91847	0.476635	2015-12-14 23:12:20
	1.60037	1.87274	5.06632	0.523335	2015-12-14 23:16:20
	1.32735	1.71169	4.28376	0.480904	2015-12-14 23:20:20
	1.32272	1.77993	4.57923	0.432033	2015-12-14 23:24:20
	1.37932	1.75953	4.52846	0.478991	2015-12-14 23:28:20
	1.33622	1.66909	4.37542	0.462626	2015-12-14 23:32:20
	1.43075	1.62275	4.28419	0.478627	2015-12-14 23:36:20
	1.42561	1.7159	4.32928	0.485571	2015-12-14 23:40:20
	1.51319	1.8464	4.52776	0.501643	2015-12-14 23:44:21
	1.44333	1.72033	4.43887	0.478001	2015-12-14 23:48:21
	1.34839	1.7702	4.27127	0.527251	2015-12-14 23:52:21
	1.34085	1.63074	4.14601	0.520198	2015-12-14 23:56:21
	1.16544	1.59025	4.51532	0.448757	2015-12-15 00:00:21
	1.68674	1.73666	4.77332	0.474876	2015-12-15 00:04:21
0.00602089	1.59695	1.75629	4.29205	0.542612	2015-12-15 00:08:21
	1.342	1.70668	4.67	0.455947	2015-12-15 00:12:21
	1.31167	1.55818	4.26801	0.413673	2015-12-15 00:16:21
	1.4781	1.65134	4.34941	0.479775	2015-12-15 00:20:22
	1.43662	1.80305	4.48152	0.507177	2015-12-15 00:24:22
	1.09017	1.66775	4.17151	0.500012	2015-12-15 00:28:22
	1.19221	1.80469	4.49583	0.504099	2015-12-15 00:32:22
	1.35905	1.69221	4.37032	0.483236	2015-12-15 00:36:22
	1.46881	1.6547	4.77029	0.476992	2015-12-15 00:40:22
	1.58681	1.71003	3.99559	0.502953	2015-12-15 00:44:22
	1.59078	1.72582	4.22042	0.49875	2015-12-15 00:48:22
	1.37336	1.78433	4.2688	0.494224	2015-12-15 00:52:23
	1.47	1.66118	4.066	0.491075	2015-12-15 00:56:23
	1.57668	1.79889	4.62918	0.515815	2015-12-15 01:00:23
	1.27496	1.70756	4.6951	0.516592	2015-12-15 01:04:23
	1.18496	1.66037	4.09063	0.463482	2015-12-15 01:08:32
	1.57659	1.78653	4.6869	0.504512	2015-12-15 01:12:32
	1.52339	1.62601	4.14927	0.499446	2015-12-15 01:16:32
	1.66486	1.67998	4.51504	0.477488	2015-12-15 01:20:32
0.00484175	1.59046	1.72303	4.82225	0.543619	2015-12-15 01:24:32
	1.51372	1.6456	4.91378	0.523825	2015-12-15 01:28:32
	1.2357	1.62792	4.39501	0.495709	2015-12-15 01:32:32
	1.60671	1.63215	4.33943	0.567409	2015-12-15 01:36:32
	1.40585	1.67984	4.44475	0.497528	2015-12-15 01:40:32
	1.07665	1.64014	4.05019	0.478118	2015-12-15 01:44:33
	1.26375	1.69077	4.37934	0.549595	2015-12-15 01:48:33
	1.39059	1.67564	4.2766	0.566348	2015-12-15 01:52:33
	1.46387	1.52562	4.26788	0.505622	2015-12-15 01:56:33
	1.44939	1.65052	4.43671	0.534366	2015-12-15 02:00:33
	1.36312	1.58021	4.07253	0.472738	2015-12-15 02:04:33
	1.34584	1.64973	4.47843	0.474482	2015-12-15 02:08:33
	0.906843	1.51651	3.90211	0.463508	2015-12-15 02:12:33
	1.33772	1.5631	4.15348	0.512626	2015-12-15 02:16:34
	0.872576	1.3795	3.62864	0.453094	2015-12-15 02:20:34
	0.973838	1.50824	3.60453	0.415101	2015-12-15 02:24:34
	1.06304	1.51959	3.98417	0.428759	2015-12-15 02:28:34
	1.03509	1.47259	3.85881	0.413879	2015-12-15 02:32:34
	1.24043	1.5883	3.96683	0.503849	2015-12-15 02:36:34
	1.21658	1.51021	3.76673	0.420318	2015-12-15 02:40:34
	1.38058	1.48813	3.78123	0.408029	2015-12-15 02:44:34
	1.29929	1.41089	3.84211	0.418439	2015-12-15 02:48:34
	1.36793	1.37857	4.21463	0.411275	2015-12-15 02:52:35
	1.27265	1.49285	3.7825	0.411284	2015-12-15 02:56:35
	0.907629	1.38101	3.54152	0.408758	2015-12-15 03:00:35
	1.35291	1.53934	3.8378	0.503388	2015-12-15 03:04:35
	1.04925	1.45778	3.48591	0.419775	2015-12-15 03:08:35
	1.11631	1.45621	3.73221	0.419517	2015-12-15 03:12:35
	1.1757	1.45502	3.68244	0.436251	2015-12-15 03:16:35
	0.932611	1.39724	3.6233	0.428206	2015-12-15 03:20:35
	1.56264	1.45723	3.94626	0.459338	2015-12-15 03:24:36
	1.63612	1.36822	3.50729	0.4883	2015-12-15 03:28:36
	1.39029	1.43629	3.71976	0.426018	2015-12-15 03:32:36
	1.55088	1.40829	3.95085	0.481262	2015-12-15 03:36:36
	1.55071	1.38178	3.48157	0.453989	2015-12-15 03:40:36
	1.3438	1.4594	4.34592	0.487666	2015-12-15 03:44:36
	1.51628	1.40748	3.79473	0.479022	2015-12-15 03:48:36
	1.15458	1.32643	3.42491	0.422013	2015-12-15 03:52:36
0.00125059	1.37547	1.40617	4.06665	0.467612	2015-12-15 03:56:36
	1.40074	1.40777	4.16457	0.443354	2015-12-15 04:00:37
	1.41982	1.45657	3.82892	0.469392	2015-12-15 04:04:37
	1.15003	1.36247	3.42009	0.461815	2015-12-15 04:08:45
	0.895029	1.37092	3.34673	0.425289	2015-12-15 04:12:45
	1.46367	1.40283	3.6008	0.436351	2015-12-15 04:16:46
	1.18217	1.22217	3.46264	0.386002	2015-12-15 04:20:46
	0.771157	1.31517	3.7426	0.392184	2015-12-15 04:24:46
	1.06089	1.34034	3.55599	0.385223	2015-12-15 04:28:46
	1.14804	1.28834	3.45619	0.434219	2015-12-15 04:32:46
	1.22469	1.49185	3.87236	0.475014	2015-12-15 04:36:46
	0.93268	1.22939	3.36619	0.408927	2015-12-15 04:40:46
	1.43649	1.38761	3.92864	0.476586	2015-12-15 04:44:46
	1.12711	1.2248	3.42437	0.38216	2015-12-15 04:48:47
	1.2732	1.34932	3.44329	0.458954	2015-12-15 04:52:47
	1.42431	1.30187	3.7892	0.49442	2015-12-15 04:56:47
	1.05445	1.32431	3.48564	0.451275	2015-12-15 05:00:47
	1.29891	1.35901	3.49414	0.473916	2015-12-15 05:04:47
	1.04956	1.25446	3.43517	0.461838	2015-12-15 05:08:47
	1.02801	1.24544	3.5655	0.442038	2015-12-15 05:12:47
	1.23704	1.35791	3.43205	0.405573	2015-12-15 05:16:47
	1.13447	1.13138	3.43574	0.428718	2015-12-15 05:20:47
	1.77018	1.23506	3.54915	0.466341	2015-12-15 05:24:48
	1.42693	1.20394	4.99463	0.41982	2015-12-15 05:28:48
	1.32479	1.18065	7.56169	0.427169	2015-12-15 05:32:48
	1.23882	1.25908	7.17747	0.4367	2015-12-15 05:36:48
	1.2466	1.09565	5.84004	0.434244	2015-12-15 05:40:48
	1.21715	1.14692	4.68919	0.454808	2015-12-15 05:44:48
	1.14338	1.13276	4.07263	0.431305	2015-12-15 05:48:48
	1.34527	1.29422	3.66721	0.424536	2015-12-15 05:52:48
	0.997589	1.3047	3.52199	0.397537	2015-12-15 05:56:49
	1.03564	1.30129	4.1768	0.404785	2015-12-15 06:00:49
	1.25586	1.24729	3.52818	0.42235	2015-12-15 06:04:49
	0.779283	1.19967	3.2921	0.448449	2015-12-15 06:08:49
	1.56805	1.24466	3.19564	0.436136	2015-12-15 06:12:49
	1.28506	1.18748	3.19576	0.449872	2015-12-15 06:16:49
	0.925806	1.17345	3.08504	0.419078	2015-12-15 06:20:49
	1.21964	1.31143	3.9508	0.45271	2015-12-15 06:24:49
	1.41347	1.25601	3.75241	0.458005	2015-12-15 06:28:49
	1.34276	1.32594	4.12208	0.471431	2015-12-15 06:32:50
	1.27739	1.28478	3.72015	0.433585	2015-12-15 06:36:50
	1.05538	1.27817	3.47799	0.484484	2015-12-15 06:40:50
	1.30038	1.24843	3.44471	0.439341	2015-12-15 06:44:50
0.000710658	1.16838	1.28294	3.37627	0.453969	2015-12-15 06:48:50
	1.1824	1.14467	3.16737	0.405531	2015-12-15 06:52:50
	1.43037	1.23247	3.79977	0.423483	2015-12-15 06:56:50
	1.13745	1.34656	4.03351	0.45558	2015-12-15 07:00:50
	1.14265	1.29907	4.05809	0.481084	2015-12-15 07:04:51
	1.30679	1.25395	4.08775	0.489032	2015-12-15 07:08:59
	1.05962	1.2508	3.76316	0.515285	2015-12-15 07:12:59
	1.92904	1.41921	3.86729	0.594161	2015-12-15 07:16:59
	1.49866	1.27922	3.79481	0.55543	2015-12-15 07:21:00
0.000916157	1.32457	1.28821	3.97828	0.546524	2015-12-15 07:25:00
0.00363746	1.29371	1.4064	4.38403	0.608832	2015-12-15 07:29:00
	1.32857	1.24514	4.14013	0.55076	2015-12-15 07:33:00
	1.61791	1.34731	4.23579	0.539229	2015-12-15 07:37:00
	1.84328	1.30343	4.32311	0.555749	2015-12-15 07:41:00
	1.54869	1.29931	3.61488	0.603105	2015-12-15 07:45:00
	1.17778	1.33726	4.30349	0.620917	2015-12-15 07:49:00
	1.54256	1.37575	4.06203	0.622478	2015-12-15 07:53:00
	1.38984	1.28625	3.56627	0.544511	2015-12-15 07:57:01
0.00332759	1.7558	1.39309	4.1958	0.656201	2015-12-15 08:01:01
	1.38452	1.3454	4.20013	0.617934	2015-12-15 08:05:01
	1.5469	1.36383	3.98516	0.57098	2015-12-15 08:09:01
	1.67035	1.29885	4.63293	0.597888	2015-12-15 08:13:01
	1.89395	1.51141	4.88704	0.693022	2015-12-15 08:17:01
	1.33063	1.40355	4.23437	0.623448	2015-12-15 08:21:01
	1.65134	1.41509	4.08931	0.627494	2015-12-15 08:25:01
	1.42524	1.4551	4.12776	0.59013	2015-12-15 08:29:02
	1.4499	1.45178	4.79934	0.536991	2015-12-15 08:33:02
0.00612898	1.66472	1.59506	5.43101	0.565321	2015-12-15 08:37:02
	1.42952	1.32213	4.25916	0.505246	2015-12-15 08:41:02
	1.6906	1.48273	4.63354	0.47418	2015-12-15 08:45:02
	1.43823	1.49045	4.53887	0.456343	2015-12-15 08:49:02
	1.29404	1.47402	4.4998	0.464174	2015-12-15 08:53:02
	1.15714	1.61817	5.156	0.483251	2015-12-15 08:57:02
	1.31651	1.51119	4.01974	0.460666	2015-12-15 09:01:02
	1.71694	1.56482	4.43815	0.489505	2015-12-15 09:05:03
	1.61122	1.57064	4.77577	0.445715	2015-12-15 09:09:03
	1.28398	1.49401	4.4729	0.428138	2015-12-15 09:13:03
	1.67687	1.67347	5.0733	0.465462	2015-12-15 09:17:03
	1.4892	1.75484	5.00882	0.451823	2015-12-15 09:21:03
	1.60586	1.70532	4.87623	0.568359	2015-12-15 09:25:03
	1.58496	1.71118	4.94169	0.466222	2015-12-15 09:29:03
	1.61783	1.76524	4.6479	0.440354	2015-12-15 09:33:03
	1.62161	1.8151	4.94492	0.492221	2015-12-15 09:37:03
	1.49472	1.82715	4.95095	0.438406	2015-12-15 09:41:04
	1.51028	1.88486	4.81039	0.422562	2015-12-15 09:45:04
	1.03807	1.89397	5.28008	0.487115	2015-12-15 09:49:04
	0.844554	1.76864	4.76475	0.403983	2015-12-15 09:53:04
0.00445916	1.30951	1.91328	4.35576	0.415597	2015-12-15 09:57:04
0.000536211	1.29302	1.86834	4.74454	0.437256	2015-12-15 10:01:04
	0.419108	1.94061	5.78752	0.409029	2015-12-15 10:05:04
	0.212271	1.98057	3.04914	0.396155	2015-12-15 10:09:13
	1.28224	1.96277	5.04758	0.431183	2015-12-15 10:13:13
0.00279569	1.52025	2.00926	4.81732	0.401199	2015-12-15 10:17:13
	1.32929	2.02377	4.49053	0.426296	2015-12-15 10:21:13
	1.47294	1.95065	4.03831	0.398648	2015-12-15 10:25:13
	1.3481	2.00217	4.4679	0.400719	2015-12-15 10:29:14
	1.3831	1.99387	4.1803	0.337034	2015-12-15 10:33:14
	1.24036	1.9936	4.17547	0.361756	2015-12-15 10:37:14
	1.08849	2.11853	4.40554	0.353665	2015-12-15 10:41:14
	1.12219	2.02215	4.40517	0.376978	2015-12-15 10:45:14
	1.27078	1.9814	4.26437	0.339735	2015-12-15 10:49:14
	1.16608	1.96436	3.82295	0.297396	2015-12-15 10:53:14
	1.2063	2.15538	4.70835	0.339494	2015-12-15 10:57:14
	1.45473	1.92674	4.28003	0.294033	2015-12-15 11:01:15
	1.4552	2.00407	4.5607	0.3075	2015-12-15 11:05:15
	1.2864	1.95489	4.20989	0.314421	2015-12-15 11:09:15
	1.21532	2.01507	4.71431	0.293192	2015-12-15 11:13:15
	0.994446	2.09541	4.8189	0.278988	2015-12-15 11:17:15
	1.09947	2.14734	4.39432	0.297614	2015-12-15 11:21:15
	1.14918	2.05158	4.32574	0.280565	2015-12-15 11:25:15
	1.37556	2.26229	4.15674	0.309464	2015-12-15 11:29:15
	1.40565	2.28921	4.21013	0.334837	2015-12-15 11:33:15
	1.29579	2.19939	4.4447	0.356065	2015-12-15 11:37:16
	1.27939	2.23212	5.19688	0.469378	2015-12-15 11:41:16
	1.32713	2.18713	4.64048	0.444519	2015-12-15 11:45:16
	1.32135	2.25177	4.34789	0.39168	2015-12-15 11:49:16
	1.03295	2.30806	4.93302	0.409688	2015-12-15 11:53:16
	1.25486	2.37932	4.96836	0.415506	2015-12-15 11:57:16
	1.23445	2.24876	4.84309	0.416528	2015-12-15 12:01:16
	1.13821	2.12881	4.59482	0.373277	2015-12-15 12:05:16
	1.54974	2.34841	5.44348	0.423239	2015-12-15 12:09:16
	1.72618	2.36215	5.4786	0.443384	2015-12-15 12:13:17
0.00385412	1.68241	2.37628	5.06511	0.442577	2015-12-15 12:17:17
	1.48209	2.37461	4.81984	0.420448	2015-12-15 12:21:17
	1.74575	2.42449	5.41614	0.446047	2015-12-15 12:25:17
	1.47757	2.25506	5.28491	0.43378	2015-12-15 12:29:17
	1.71157	2.17287	4.78419	0.406081	2015-12-15 12:33:17
	1.66112	2.23843	4.68679	0.410241	2015-12-15 12:37:17
	1.51784	2.28177	4.81724	0.439229	2015-12-15 12:41:17
	1.1596	2.25593	4.69509	0.403709	2015-12-15 12:45:18
	1.34312	2.2586	4.89063	0.368307	2015-12-15 12:49:18
	1.3332	2.27331	4.44585	0.391004	2015-12-15 12:53:18
	1.53303	2.21748	4.83111	0.408992	2015-12-15 12:57:18
	1.56465	2.30715	4.7873	0.373124	2015-12-15 13:01:18
	1.5503	2.18857	4.55057	0.359646	2015-12-15 13:05:18
	1.3728	2.04633	4.33612	0.352658	2015-12-15 13:09:27
	1.60671	2.49507	5.16342	0.406509	2015-12-15 13:13:27
	1.31866	2.28419	4.29038	0.368198	2015-12-15 13:17:27
	1.53872	2.30085	5.04077	0.417553	2015-12-15 13:21:27
	1.7058	2.21145	4.50722	0.411768	2015-12-15 13:25:27
	1.36064	2.07824	4.05413	0.342281	2015-12-15 13:29:27
	1.49695	2.05469	3.87936	0.339231	2015-12-15 13:33:27
	1.40715	2.0823	3.84151	0.33944	2015-12-15 13:37:28
	1.02864	2.00623	3.90274	0.319432	2015-12-15 13:41:28
	1.4717	2.20783	4.23934	0.357934	2015-12-15 13:45:28
0.00707497	1.54652	2.14401	4.24608	0.343117	2015-12-15 13:49:28
	1.4613	2.091	4.30729	0.328875	2015-12-15 13:53:28
	1.62171	2.25107	4.10217	0.347839	2015-12-15 13:57:28
	1.54789	2.01364	3.68875	0.31838	2015-12-15 14:01:28
	1.29504	2.21316	4.97933	0.347385	2015-12-15 14:05:28
	1.1291	2.16744	4.67949	0.327531	2015-12-15 14:09:29
	1.1949	2.25864	4.62438	0.328173	2015-12-15 14:13:29
	1.28553	2.39304	4.72103	0.369397	2015-12-15 14:17:29
	1.61925	2.12755	4.85528	0.289872	2015-12-15 14:21:29
	1.47136	1.94343	4.358	0.211027	2015-12-15 14:25:29
	1.07703	1.8807	4.0394	0.201362	2015-12-15 14:29:29
	0.792511	1.88436	4.72819	0.197594	2015-12-15 14:33:29
	1.07487	1.8129	4.55564	0.166035	2015-12-15 14:37:29
	1.28306	1.91545	4.65042	0.225306	2015-12-15 14:41:29
	0.682601	1.93715	4.57413	0.207882	2015-12-15 14:45:30
	1.07714	1.8735	4.20007	0.200285	2015-12-15 14:49:30
	1.00798	1.94278	4.2875	0.196274	2015-12-15 14:53:30
	0.977295	1.97715	4.24716	0.192313	2015-12-15 14:57:30
	0.749678	1.95272	4.61863	0.214437	2015-12-15 15:01:30
	0.920607	1.80092	4.47549	0.184667	2015-12-15 15:05:30
	0.708927	1.71462	4.08876	0.165518	2015-12-15 15:09:30
	0.77338	1.8572	4.41753	0.19008	2015-12-15 15:13:30
	1.26965	1.89974	4.51709	0.191762	2015-12-15 15:17:31
	0.80586	1.89789	4.45265	0.196681	2015-12-15 15:21:31
	0.674333	1.89991	4.34734	0.215337	2015-12-15 15:25:31
	1.13295	1.99043	4.69821	0.23174	2015-12-15 15:29:31
	1.04143	1.82124	4.13769	0.214481	2015-12-15 15:33:31
	0.722759	1.9099	4.51178	0.199631	2015-12-15 15:37:31
	0.796915	1.88458	4.45455	0.2105	2015-12-15 15:41:31
	0.543688	2.06757	4.15533	0.224584	2015-12-15 15:45:31
	1.09797	2.17311	4.50294	0.244897	2015-12-15 15:49:31
	0.795737	2.00493	4.45597	0.277595	2015-12-15 15:53:32
	1.00165	2.05194	4.36672	0.275247	2015-12-15 15:57:32
	1.28192	1.97197	4.61585	0.226175	2015-12-15 16:01:32
	0.602452	1.81362	4.38212	0.238262	2015-12-15 16:05:32
	0.370758	1.83279	4.11583	0.204242	2015-12-15 16:09:41
	0.993071	1.83875	4.16281	0.218718	2015-12-15 16:13:41
	0.829436	1.8995	4.3573	0.222614	2015-12-15 16:17:41
	0.7468	1.92787	4.4112	0.21319	2015-12-15 16:21:41
	0.679147	1.99108	4.96621	0.258693	2015-12-15 16:25:41
	1.14108	1.85081	4.43917	0.230438	2015-12-15 16:29:41
	1.20056	1.7784	3.88542	0.201889	2015-12-15 16:33:41
	1.04582	1.82793	4.18832	0.218027	2015-12-15 16:37:41
	1.03672	1.81406	3.64194	0.204101	2015-12-15 16:41:42
	0.910157	1.75608	3.79298	0.244262	2015-12-15 16:45:42
	0.83728	1.96497	5.09688	0.312056	2015-12-15 16:49:42
	1.1322	2.10375	5.7476	0.372831	2015-12-15 16:53:42
	1.42446	2.15207	5.98965	0.392192	2015-12-15 16:57:42
	1.88984	2.32866	5.70169	0.386831	2015-12-15 17:01:42
	1.40049	2.16965	5.60043	0.402207	2015-12-15 17:05:42
	1.44235	2.09904	5.69103	0.350629	2015-12-15 17:09:42
	1.32979	2.19238	5.58826	0.359882	2015-12-15 17:13:42
	1.40492	2.09595	5.72017	0.33725	2015-12-15 17:17:43
	1.36743	2.10477	5.64552	0.376184	2015-12-15 17:21:43
	1.47242	2.07622	5.39879	0.330634	2015-12-15 17:25:43
	1.23959	1.96944	4.63366	0.306125	2015-12-15 17:29:43
	1.57959	2.04391	5.15667	0.30664	2015-12-15 17:33:43
	1.352	2.16083	5.09794	0.385199	2015-12-15 17:37:43
	1.05897	2.24076	5.45749	0.406337	2015-12-15 17:41:43
	1.27103	2.16154	5.63244	0.350798	2015-12-15 17:45:43
	1.06533	2.1108	5.31874	0.372473	2015-12-15 17:49:43
	0.949376	1.93103	4.70888	0.318732	2015-12-15 17:53:44
	1.22242	1.83774	4.64225	0.3381	2015-12-15 17:57:44
	1.34977	2.02022	4.77315	0.316629	2015-12-15 18:01:44
	1.33358	2.15103	4.96772	0.337305	2015-12-15 18:05:44
	1.4057	2.10334	5.16555	0.322073	2015-12-15 18:09:44
	1.66467	2.02785	4.5413	0.319575	2015-12-15 18:13:44
	1.24132	2.07307	4.87872	0.35695	2015-12-15 18:17:44
	0.828142	1.75282	4.5132	0.272412	2015-12-15 18:21:44
	1.37598	1.76047	4.2918	0.296537	2015-12-15 18:25:45
0.00254449	1.10639	1.92459	4.8271	0.305474	2015-12-15 18:29:45
	0.955851	1.58224	4.54888	0.235347	2015-12-15 18:33:45
	1.14953	1.51665	4.325	0.231602	2015-12-15 18:37:45
	0.795203	1.29208	3.7964	0.214551	2015-12-15 18:41:45
	0.359817	1.2078	3.5086	0.170352	2015-12-15 18:45:45
	0.711388	1.18725	3.6181	0.172151	2015-12-15 18:49:45
	0.94654	1.52557	4.83263	0.23833	2015-12-15 18:53:45
	0.805312	1.27026	3.68156	0.19011	2015-12-15 18:57:45
	0.501998	0.84185	2.45949	0.153266	2015-12-15 19:01:46
	0.806449	0.930974	2.77501	0.157395	2015-12-15 19:05:46
	1.44683	1.48017	3.78607	0.21907	2015-12-15 19:09:54
0.00852835	1.00224	1.54455	4.22899	0.222785	2015-12-15 19:13:55
	0.950499	1.37091	4.35234	0.176078	2015-12-15 19:17:55
0.0024669	0.816841	1.52583	4.25061	0.209656	2015-12-15 19:21:55
	0.568422	1.56263	3.99462	0.219189	2015-12-15 19:25:55
	0.974004	1.61137	4.11169	0.257079	2015-12-15 19:29:55
	0.976158	1.58104	4.1469	0.247705	2015-12-15 19:33:55
	1.18748	1.69535	5.10119	0.305002	2015-12-15 19:37:55
	1.40064	1.97404	5.8552	0.386584	2015-12-15 19:41:55
	1.33428	1.94426	5.65701	0.391573	2015-12-15 19:45:55
	1.36176	2.00135	5.95753	0.361076	2015-12-15 19:49:56
	0.974443	1.8147	5.96338	0.351316	2015-12-15 19:53:56
	1.30596	1.8698	5.86963	0.357771	2015-12-15 19:57:56
	0.884867	1.82166	5.58689	0.32495	2015-12-15 20:01:56
	1.00816	1.76988	5.6494	0.309183	2015-12-15 20:05:56
	1.39986	1.97877	7.06037	0.316056	2015-12-15 20:09:56
	1.46746	1.84555	6.05176	0.315207	2015-12-15 20:13:56
	1.19432	2.04678	5.78758	0.393467	2015-12-15 20:17:56
	0.91497	1.95664	6.09064	0.350834	2015-12-15 20:21:56
	0.774922	1.92396	5.87711	0.36003	2015-12-15 20:25:57
	1.16557	1.89844	5.31584	0.346418	2015-12-15 20:29:57
	1.08129	1.8254	5.37223	0.363827	2015-12-15 20:33:57
	1.18502	1.89355	5.2549	0.364991	2015-12-15 20:37:57
	1.33113	1.82427	5.16761	0.359747	2015-12-15 20:41:57
	1.49	1.79921	5.57588	0.351063	2015-12-15 20:45:57
	1.3819	1.79942	5.21757	0.366065	2015-12-15 20:49:57
	1.17633	1.91727	5.26214	0.366841	2015-12-15 20:53:57
	1.37841	1.8677	5.67543	0.406329	2015-12-15 20:57:58
	1.25785	1.87213	5.8113	0.36356	2015-12-15 21:01:58
	1.24963	1.94753	5.26904	0.332907	2015-12-15 21:05:58
	1.24577	1.98504	5.29535	0.334626	2015-12-15 21:09:58
	1.30508	1.83589	5.08532	0.376938	2015-12-15 21:13:58
	1.03116	1.90718	5.50601	0.333398	2015-12-15 21:17:58
	0.861743	1.91259	5.00337	0.353012	2015-12-15 21:21:58
	0.949242	1.8747	5.6279	0.405386	2015-12-15 21:25:58
0.00723208	1.03003	1.89853	4.97084	0.355069	2015-12-15 21:29:58
	1.00682	1.85343	4.87269	0.322131	2015-12-15 21:33:59
	0.938276	1.91576	4.92325	0.344665	2015-12-15 21:37:59
	0.865124	1.74982	4.8352	0.316564	2015-12-15 21:41:59
	1.13486	1.77245	4.98717	0.375107	2015-12-15 21:45:59
	1.01979	1.86198	4.96882	0.33943	2015-12-15 21:49:59
	1.02956	1.89632	5.37924	0.332553	2015-12-15 21:53:59
	1.03331	1.78091	4.79532	0.298724	2015-12-15 21:57:59
	0.881655	1.76897	5.11728	0.343838	2015-12-15 22:01:59
	0.953842	1.98085	4.99495	0.385165	2015-12-15 22:06:00
0.00770709	0.861365	1.94861	4.96455	0.33603	2015-12-15 22:10:08
	1.10965	1.9086	4.61768	0.310258	2015-12-15 22:14:08
	1.07196	1.9188	5.13757	0.348251	2015-12-15 22:18:08
	0.799467	1.78611	4.92296	0.339282	2015-12-15 22:22:09
	1.13842	1.93743	5.09248	0.332273	2015-12-15 22:26:09
	0.915248	1.73774	4.6141	0.284712	2015-12-15 22:30:09
	1.25336	1.96052	5.47565	0.356638	2015-12-15 22:34:09
	1.03489	1.74385	5.21212	0.352582	2015-12-15 22:38:09
	0.950844	1.72342	5.12633	0.349539	2015-12-15 22:42:09
	1.34288	1.8905	5.39458	0.359306	2015-12-15 22:46:09
	1.17734	1.86525	4.89749	0.327891	2015-12-15 22:50:09
	1.70658	1.78127	5.18012	0.345267	2015-12-15 22:54:09
	1.22095	1.71675	4.9863	0.327764	2015-12-15 22:58:10
	1.01204	1.857	4.72748	0.361931	2015-12-15 23:02:10
	0.905075	1.69271	4.60045	0.292415	2015-12-15 23:06:10
	1.0768	1.74934	4.08769	0.294482	2015-12-15 23:10:10
	0.730276	1.708	3.95068	0.302805	2015-12-15 23:14:10
	1.08863	1.79504	5.22002	0.294109	2015-12-15 23:18:10
	0.982355	1.80171	4.65643	0.310019	2015-12-15 23:22:10
	0.474535	1.77124	4.7272	0.27775	2015-12-15 23:26:10
	0.755989	1.67941	4.62439	0.318538	2015-12-15 23:30:11
	0.640962	1.8276	4.82133	0.308379	2015-12-15 23:34:11
0.00298589	0.842945	1.73482	4.54183	0.297101	2015-12-15 23:38:11
	1.01054	1.7078	4.72791	0.331148	2015-12-15 23:42:11
	1.16932	1.69717	4.32307	0.314787	2015-12-15 23:46:11
	1.20454	1.60827	4.28424	0.305307	2015-12-15 23:50:11
	0.994552	1.51118	4.05593	0.252336	2015-12-15 23:54:11
	1.13495	1.49904	3.30173	0.251822	2015-12-15 23:58:11
	1.1949	1.40176	3.60562	0.225529	2015-12-16 00:02:11
	0.839531	1.41294	3.62907	0.209576	2015-12-16 00:06:12
	0.870346	1.47906	3.75447	0.246947	2015-12-16 00:10:12
	1.30383	1.5922	3.98712	0.250636	2015-12-16 00:14:12
	0.836518	1.54868	4.23514	0.254495	2015-12-16 00:18:12
	0.997269	1.66633	4.05247	0.247932	2015-12-16 00:22:12
	0.780737	1.60369	3.94627	0.239857	2015-12-16 00:26:12
	1.01702	1.64462	4.27132	0.284072	2015-12-16 00:30:12
	0.561053	1.37722	3.38503	0.234509	2015-12-16 00:34:12
	0.645182	1.38672	3.47607	0.259675	2015-12-16 00:38:13
	0.888744	1.40964	3.50241	0.25903	2015-12-16 00:42:13
	0.892075	1.29546	3.73219	0.199918	2015-12-16 00:46:13
	0.869948	1.40869	3.71359	0.199227	2015-12-16 00:50:13
	0.878154	1.36587	3.51718	0.244883	2015-12-16 00:54:13
	0.59081	1.3164	3.54593	0.239808	2015-12-16 00:58:13
	0.765846	1.31639	3.38739	0.186934	2015-12-16 01:02:13
	0.929982	1.35533	3.66608	0.243804	2015-12-16 01:06:13
	0.773463	1.18475	3.0608	0.206627	2015-12-16 01:10:22
	0.660147	1.25503	3.10158	0.223758	2015-12-16 01:14:22
	0.78323	1.34564	3.6269	0.234671	2015-12-16 01:18:22
	0.650071	1.21623	3.04449	0.215563	2015-12-16 01:22:22
	0.715294	1.14337	3.40698	0.153767	2015-12-16 01:26:22
	0.738028	1.25034	2.89073	0.200901	2015-12-16 01:30:23
	0.490103	1.32139	3.11257	0.197612	2015-12-16 01:34:23
	0.901547	1.19581	2.80942	0.213651	2015-12-16 01:38:23
	0.712146	1.30864	3.60737	0.240471	2015-12-16 01:42:23
0.0067681	1.00121	1.32201	3.66206	0.245864	2015-12-16 01:46:23
	1.18913	1.31158	3.72304	0.199133	2015-12-16 01:50:23
	0.584848	1.20796	3.57526	0.192453	2015-12-16 01:54:23
	0.895765	1.33678	3.94587	0.25314	2015-12-16 01:58:23
	0.805576	1.35057	3.87619	0.218186	2015-12-16 02:02:24
	0.723823	1.37611	3.73943	0.206069	2015-12-16 02:06:24
	0.701865	1.22623	3.39922	0.217124	2015-12-16 02:10:24
	0.688938	1.37703	3.64945	0.223611	2015-12-16 02:14:24
	0.738873	1.28842	3.30238	0.21506	2015-12-16 02:18:24
	0.76978	1.27733	3.43817	0.216242	2015-12-16 02:22:24
	0.832572	1.33824	3.6632	0.213971	2015-12-16 02:26:24
0.00259656	0.868082	1.32698	3.50445	0.203747	2015-12-16 02:30:24
	0.876697	1.36723	3.4712	0.228318	2015-12-16 02:34:24
	0.939894	1.38582	3.76202	0.214657	2015-12-16 02:38:25
	1.05855	1.31935	4.08121	0.211397	2015-12-16 02:42:25
	0.537474	1.32637	3.94977	0.208769	2015-12-16 02:46:25
	0.691296	1.39745	3.74545	0.222401	2015-12-16 02:50:25
	0.677655	1.34453	4.51045	0.246605	2015-12-16 02:54:25
	0.557791	1.40922	4.09909	0.273296	2015-12-16 02:58:25
	0.619609	1.41364	3.91449	0.226978	2015-12-16 03:02:25
	0.50088	1.41953	4.31794	0.28462	2015-12-16 03:06:25
	0.801852	1.38445	4.28597	0.258027	2015-12-16 03:10:26
	0.483552	1.28092	4.11157	0.203511	2015-12-16 03:14:26
	0.810122	1.3125	3.7204	0.243661	2015-12-16 03:18:26
	0.851175	1.42843	3.96765	0.237429	2015-12-16 03:22:26
	0.882254	1.26905	3.82043	0.216415	2015-12-16 03:26:26
	0.891674	1.25468	3.56492	0.207304	2015-12-16 03:30:26
	1.01867	1.42515	3.76978	0.229106	2015-12-16 03:34:26
	0.657583	1.34073	3.97429	0.254858	2015-12-16 03:38:26
	0.323986	1.26913	3.72825	0.22498	2015-12-16 03:42:26
	0.571244	1.27267	3.81622	0.237072	2015-12-16 03:46:27
	0.726881	1.34278	3.63539	0.239581	2015-12-16 03:50:27
	0.760764	1.30846	3.44482	0.235456	2015-12-16 03:54:27
	0.993701	1.33432	3.7644	0.229065	2015-12-16 03:58:27
	0.630858	1.33256	4.01169	0.228248	2015-12-16 04:02:27
	0.679169	1.3367	3.90042	0.230663	2015-12-16 04:06:27
	0.664308	1.23981	3.53909	0.196518	2015-12-16 04:10:36
	0.972908	1.37735	3.87523	0.241442	2015-12-16 04:14:36
	0.866191	1.28986	3.91022	0.21652	2015-12-16 04:18:36
	0.643279	1.37465	4.21767	0.229354	2015-12-16 04:22:36
	0.728465	1.36471	3.89337	0.243548	2015-12-16 04:26:36
	0.839244	1.36653	3.87008	0.214429	2015-12-16 04:30:36
	0.937966	1.35219	3.88258	0.219089	2015-12-16 04:34:36
	0.887649	1.37453	4.50405	0.233706	2015-12-16 04:38:37
	0.964267	1.38251	4.24497	0.235746	2015-12-16 04:42:37
	0.53811	1.35146	3.68757	0.216891	2015-12-16 04:46:37
	0.705845	1.46184	4.30803	0.230095	2015-12-16 04:50:37
	0.603936	1.38102	4.22462	0.253091	2015-12-16 04:54:37
	0.677082	1.34787	4.07144	0.211105	2015-12-16 04:58:37
	0.665775	1.39472	4.0296	0.229472	2015-12-16 05:02:37
	0.559774	1.27013	3.77397	0.242719	2015-12-16 05:06:37
	0.631601	1.38254	4.09916	0.246677	2015-12-16 05:10:38
	1.06755	1.35379	4.34594	0.23464	2015-12-16 05:14:38
	0.846654	1.4056	4.05204	0.239152	2015-12-16 05:18:38
	0.910752	1.40493	4.06486	0.238469	2015-12-16 05:22:38
	0.803265	1.36322	4.53126	0.21768	2015-12-16 05:26:38
	0.664769	1.2493	4.06507	0.215559	2015-12-16 05:30:38
	0.789173	1.18819	2.97889	0.226253	2015-12-16 05:34:38
	0.906284	1.24966	3.01584	0.244272	2015-12-16 05:38:38
0.00434757	0.690509	1.22912	2.86059	0.211393	2015-12-16 05:42:38
	0.629153	0.964574	1.54525	0.128474	2015-12-16 05:46:39
	0.437379	0.912617	1.38676	0.12454	2015-12-16 05:50:39
	0.619912	0.854091	1.3197	0.0949592	2015-12-16 05:54:39
	0.522933	0.807023	1.39581	0.0841948	2015-12-16 05:58:39
	0.371443	0.716409	1.42916	0.0940124	2015-12-16 06:02:39
	0.258727	0.75418	1.68622	0.112276	2015-12-16 06:06:39
	0.272101	0.75734	1.59512	0.119697	2015-12-16 06:10:39
	0.260673	0.769126	1.67422	0.110955	2015-12-16 06:14:39
	0.207876	0.849141	1.63543	0.107453	2015-12-16 06:18:40
	0.137244	0.826139	1.73824	0.134265	2015-12-16 06:22:40
	0.36211	0.875365	1.72945	0.131056	2015-12-16 06:26:40
	0.788812	0.929563	1.61577	0.0942823	2015-12-16 06:30:40
	0.376962	0.854703	1.47467	0.0796462	2015-12-16 06:34:40
	0.185391	0.749942	1.3349	0.0834818	2015-12-16 06:38:40
	0.432289	0.701288	1.13889	0.0520817	2015-12-16 06:42:40
	0.307084	0.634336	0.966684	0.0712868	2015-12-16 06:46:40
	0.221258	0.613074	0.974613	0.0700277	2015-12-16 06:50:40
	0.406397	0.666244	0.744361	0.0751992	2015-12-16 06:54:41
	0.308703	0.570944	0.521555	0.062101	2015-12-16 06:58:41
		0.570455	0.796725	0.0435508	2015-12-16 07:02:41
	0.0625373	0.489782	0.842124	0.0583167	2015-12-16 07:06:41
		0.50455	0.685549	0.0617642	2015-12-16 07:10:49
	0.0166826	0.669105	0.91835	0.0258723	2015-12-16 07:14:50
		0.619622	0.95435	0.0294119	2015-12-16 07:18:50
	0.216953	0.580169	0.565213	0.0609305	2015-12-16 07:22:50
	0.319779	0.676281	0.965384	0.0355334	2015-12-16 07:26:50
	0.331386	0.653197	0.67648	0.0431982	2015-12-16 07:30:50
	0.445472	0.702866	0.346076	0.0563261	2015-12-16 07:34:50
	0.598934	0.745069	0.825486	0.059318	2015-12-16 07:38:50
	0.616398	0.770549	0.783502	0.0369823	2015-12-16 07:42:50
	0.725661	0.805343	0.987053	0.0386372	2015-12-16 07:46:51
	0.676719	0.75353	0.97644	0.0445818	2015-12-16 07:50:51
	0.268636	0.802672	0.925725	0.0492125	2015-12-16 07:54:51
	0.121444	0.78971	1.02064	0.06849	2015-12-16 07:58:51
	0.343627	0.758553	1.18543	0.0501234	2015-12-16 08:02:51
	0.352862	0.744033	0.914207	0.0629942	2015-12-16 08:06:51
	0.540022	0.901248	0.620215	0.033918	2015-12-16 08:10:51
	0.126185	0.937971	0.957464	0.0384384	2015-12-16 08:14:51
	0.419733	0.829116	1.00826	0.0532083	2015-12-16 08:18:51
	0.402082	0.956749	1.22377	0.0477609	2015-12-16 08:22:52
	0.320587	0.9229	1.16622	0.0541001	2015-12-16 08:26:52
	0.494715	0.957721	1.21836	0.0679622	2015-12-16 08:30:52
	0.474448	0.954769	1.78666	0.0781036	2015-12-16 08:34:52
	0.530654	1.01858	1.6072	0.0540496	2015-12-16 08:38:52
	0.566154	1.11788	1.80141	0.0613214	2015-12-16 08:42:52
	0.333686	1.14232	2.1844	0.109972	2015-12-16 08:46:52
	0.529433	1.42624	2.97656	0.125192	2015-12-16 08:50:52
	0.395145	1.1286	2.24014	0.0824404	2015-12-16 08:54:53
	0.463976	1.1807	2.10544	0.108126	2015-12-16 08:58:53
	0.476016	1.22196	1.68235	0.0842698	2015-12-16 09:02:53
	0.422554	1.17072	1.77665	0.0879521	2015-12-16 09:06:53
	0.267121	0.887567	1.00907	0.0637218	2015-12-16 09:10:53
	0.70445	1.1897	2.00828	0.0968359	2015-12-16 09:14:53
	0.579097	1.21025	2.14367	0.0900123	2015-12-16 09:18:53
	0.678885	1.31622	1.91563	0.0966792	2015-12-16 09:22:53
	0.544807	1.21399	1.9587	0.0932498	2015-12-16 09:26:53
	0.61388	1.06478	1.53253	0.0764085	2015-12-16 09:30:54
	0.490346	0.978465	1.31124	0.0660874	2015-12-16 09:34:54
	0.453455	0.940029	1.4238	0.0811051	2015-12-16 09:38:54
	0.326124	0.999714	1.81498	0.0579067	2015-12-16 09:42:54
	0.61996	1.0756	1.717	0.0548843	2015-12-16 09:46:54
	0.316831	0.996398	2.16432	0.0727531	2015-12-16 09:50:54
	0.284413	0.963417	1.24868	0.0700101	2015-12-16 09:54:54
	0.381463	1.06432	1.46673	0.0787846	2015-12-16 09:58:54
	0.469134	1.06427	1.59859	0.0489927	2015-12-16 10:02:54
	0.233899	1.16521	2.09655	0.0676721	2015-12-16 10:06:55
	0.439467	1.21077	2.2335	0.0860659	2015-12-16 10:11:03
	0.403974	1.25638	2.07691	0.110212	2015-12-16 10:15:03
	0.738058	1.24001	2.24668	0.105407	2015-12-16 10:19:04
	0.48085	1.1381	1.8175	0.088938	2015-12-16 10:23:04
	0.229258	1.11958	1.74419	0.0696424	2015-12-16 10:27:04
	0.201154	1.01467	1.49875	0.0776938	2015-12-16 10:31:04
	0.543813	1.01725	1.48335	0.0732038	2015-12-16 10:35:04
	0.508705	0.874086	1.41972	0.0688292	2015-12-16 10:39:04
	0.669246	1.02749	1.51732	0.0683432	2015-12-16 10:43:04
	0.761124	0.985517	1.52143	0.101071	2015-12-16 10:47:04
	0.475909	1.09724	2.10695	0.0987624	2015-12-16 10:51:04
	0.346617	1.06135	1.75099	0.0847176	2015-12-16 10:55:05
	0.685599	1.11925	1.59253	0.0967555	2015-12-16 10:59:05
	0.522846	1.07547	1.79046	0.0959148	2015-12-16 11:03:05
0.00386651	0.388683	0.913695	1.5039	0.0755798	2015-12-16 11:07:05
	0.514458	0.913735	1.41193	0.0803645	2015-12-16 11:11:05
	0.383529	0.858776	1.02063	0.0894376	2015-12-16 11:15:05
	0.0512417	0.722567	1.18775	0.0568785	2015-12-16 11:19:05
	0.0154402	0.830217	1.41653	0.050945	2015-12-16 11:23:05
	0.382163	0.874974	1.46677	0.0876512	2015-12-16 11:27:06
	0.370722	0.853774	1.2362	0.0717099	2015-12-16 11:31:06
	0.263944	0.733921	0.951792	0.046589	2015-12-16 11:35:06
	0.165436	0.662006	1.06772	0.02924	2015-12-16 11:39:06
	0.322931	0.697727	0.717883	0.0415617	2015-12-16 11:43:06
0.00507428	0.52847	0.668266	1.06216	0.0343583	2015-12-16 11:47:06
	0.322466	0.751012	1.03263	0.0368338	2015-12-16 11:51:06
	0.256842	0.732155	0.970738	0.0534417	2015-12-16 11:55:06
	0.0974126	0.663729	1.1177	0.0503911	2015-12-16 11:59:06
	0.263473	0.720459	0.781137	0.0483538	2015-12-16 12:03:07
	0.616587	0.670049	0.686283	0.0573737	2015-12-16 12:07:07
	0.489319	0.658472	0.679725	0.0313306	2015-12-16 12:11:07
	0.147997	0.5837	0.72058	0.0282078	2015-12-16 12:15:07
	0.24924	0.573628	0.984998	0.0493237	2015-12-16 12:19:07
	0.343066	0.61764	0.914845	0.0468311	2015-12-16 12:23:07
		0.536449	0.727965	0.0281871	2015-12-16 12:27:07
	0.0394533	0.434076	0.821018	0.0462421	2015-12-16 12:31:07
	0.325965	0.525726	0.66569	0.031164	2015-12-16 12:35:07
	0.282037	0.48819	0.480312	0.054781	2015-12-16 12:39:08
	0.125824	0.698449	1.05975	0.0508031	2015-12-16 12:43:08
	0.298105	0.822051	1.24617	0.0608539	2015-12-16 12:47:08
	0.667176	0.763743	1.39655	0.0667475	2015-12-16 12:51:08
	0.223285	0.853141	1.26588	0.0684868	2015-12-16 12:55:08
	0.523843	0.769562	1.33696	0.073757	2015-12-16 12:59:08
	0.292383	0.660831	1.05121	0.0399207	2015-12-16 13:03:08
	0.361301	0.581941	0.81637	0.0595756	2015-12-16 13:07:08
0.00503008	0.526608	0.614483	0.809562	0.0384682	2015-12-16 13:11:17
	0.359547	0.62858	0.953173	0.0168383	2015-12-16 13:15:17
	0.266681	0.633765	0.670615	0.0366492	2015-12-16 13:19:17
	0.132883	0.722557	0.998339	0.0385	2015-12-16 13:23:17
	0.0819797	0.728366	1.32655	0.0449598	2015-12-16 13:27:18
	0.512568	0.690958	0.927922	0.062635	2015-12-16 13:31:18
	0.0753003	0.661255	0.725936	0.0468142	2015-12-16 13:35:18
	0.0775918	0.729832	0.946169	0.0355659	2015-12-16 13:39:18
		0.617293	1.46161	0.0465728	2015-12-16 13:43:18
	0.0495296	0.675618	1.154	0.0545876	2015-12-16 13:47:18
	0.117966	0.780469	1.16476	0.0429075	2015-12-16 13:51:18
	0.448433	0.73685	1.19755	0.0470499	2015-12-16 13:55:18
	0.586171	0.768166	1.0636	0.0380172	2015-12-16 13:59:18
	0.297754	0.761791	1.41951	0.0467495	2015-12-16 14:03:19
	0.317711	0.790542	1.36383	0.0509441	2015-12-16 14:07:19
0.00309886	0.242946	0.791734	1.11626	0.0218082	2015-12-16 14:11:19
	0.302025	0.843489	1.62088	0.0359589	2015-12-16 14:15:19
	0.549801	0.777233	1.02588	0.0478331	2015-12-16 14:19:19
	0.216736	0.741962	1.50495	0.0550919	2015-12-16 14:23:19
	0.212631	0.726533	1.41512	0.0457816	2015-12-16 14:27:19
	0.490553	0.698588	1.44153	0.034971	2015-12-16 14:31:19
	0.327903	0.760666	1.34006	0.0548946	2015-12-16 14:35:20
	0.0260954	0.823045	1.37509	0.0553214	2015-12-16 14:39:20
	0.149437	0.812489	1.204	0.0518312	2015-12-16 14:43:20
	0.144139	0.730884	1.24605	0.0489589	2015-12-16 14:47:20
	0.407775	0.644913	1.16184	0.0397596	2015-12-16 14:51:20
	0.303542	0.641905	1.25506	0.0496527	2015-12-16 14:55:20
	0.0977217	0.754348	1.40422	0.0491135	2015-12-16 14:59:20
	0.415285	0.602284	0.789663	0.0390622	2015-12-16 15:03:20
	0.284679	0.720352	1.36056	0.0232298	2015-12-16 15:07:20
	0.062151	0.680256	1.39994	0.0468009	2015-12-16 15:11:21
	0.0751386	0.664337	1.18106	0.04433	2015-12-16 15:15:21
0.0048972	0.17563	0.630234	1.21165	0.04594	2015-12-16 15:19:21
	0.835751	0.726724	1.08769	0.0283257	2015-12-16 15:23:21
	0.357652	0.68475	1.18915	0.0279946	2015-12-16 15:27:21
0.00776678	0.490161	0.668886	0.762901	0.0287476	2015-12-16 15:31:21
	0.210681	0.682555	0.90393	0.0427746	2015-12-16 15:35:21
	0.288271	0.685386	0.937692	0.0363671	2015-12-16 15:39:21
	0.55615	0.635951	0.9458	0.0457716	2015-12-16 15:43:21
	0.212417	0.571143	1.34119	0.0465493	2015-12-16 15:47:22
	0.415238	0.700021	1.21275	0.0546782	2015-12-16 15:51:22
	0.37435	0.754136	1.47416	0.0351754	2015-12-16 15:55:22
	0.444463	0.77421	1.61384	0.0420914	2015-12-16 15:59:22
	0.556388	0.748399	1.18844	0.0516358	2015-12-16 16:03:22
	0.457829	0.664562	1.38777	0.0447837	2015-12-16 16:07:22
	0.352332	0.728149	1.17383	0.0612364	2015-12-16 16:11:31
	0.600993	0.696436	0.875064	0.0495003	2015-12-16 16:15:31
	0.595195	0.834194	2.87875	0.0441489	2015-12-16 16:19:31
	0.736885	0.797431	1.61184	0.0434293	2015-12-16 16:23:31
	0.562996	0.749032	1.44437	0.0448764	2015-12-16 16:27:31
	0.272044	0.799711	1.28386	0.0575623	2015-12-16 16:31:31
	0.326622	0.771188	1.23085	0.0602299	2015-12-16 16:35:32
	0.00448304	0.764961	1.29737	0.0366939	2015-12-16 16:39:32
	0.194508	0.755269	1.39287	0.0530393	2015-12-16 16:43:32
	0.360126	0.806832	1.34583	0.0451113	2015-12-16 16:47:32
	0.764363	0.811893	1.59332	0.0519979	2015-12-16 16:51:32
	0.679589	0.806064	2.18278	0.0669553	2015-12-16 16:55:32
	0.53617	0.732211	1.87174	0.0525614	2015-12-16 16:59:32
	0.30808	0.824695	2.29979	0.046289	2015-12-16 17:03:32
	0.439711	0.871548	2.07732	0.072427	2015-12-16 17:07:32
	0.358647	0.752423	2.32216	0.0634281	2015-12-16 17:11:33
		0.730523	2.17866	0.0597061	2015-12-16 17:15:33
		0.689856	2.35037	0.0525372	2015-12-16 17:19:33
	0.221575	0.679565	2.17621	0.067042	2015-12-16 17:23:33
	0.0464171	0.682944	2.04257	0.0413214	2015-12-16 17:27:33
	0.331462	0.625229	1.7765	0.0438761	2015-12-16 17:31:33
	0.230207	0.647913	1.89111	0.0356027	2015-12-16 17:35:33
		0.613817	1.98113	0.0390738	2015-12-16 17:39:33
	0.357609	0.659894	1.80518	0.0520471	2015-12-16 17:43:34
	0.288746	0.631801	1.60777	0.0425443	2015-12-16 17:47:34
	0.520268	0.595294	1.49092	0.0412532	2015-12-16 17:51:34
	0.524233	0.668108	2.14192	0.0287073	2015-12-16 17:55:34
	0.464205	0.68514	2.46785	0.0286995	2015-12-16 17:59:34
	0.341663	0.66529	3.32829	0.033753	2015-12-16 18:03:34
		0.554961	1.83316	0.0505589	2015-12-16 18:07:34
	1.82228	0.652454	1.57189	0.0222112	2015-12-16 18:11:34
	0.20274	0.717895	3.33583	0.0403509	2015-12-16 18:15:34
	0.389659	0.630276	2.60267	0.0340391	2015-12-16 18:19:35
	0.358038	0.830463	7.62426	0.0185458	2015-12-16 18:23:35
	0.576177	0.672236	2.83396	0.042402	2015-12-16 18:27:35
	0.558054	0.825827	3.53484	0.0334063	2015-12-16 18:31:35
0.0079797	0.209341	0.886082	8.40573	0.0191663	2015-12-16 18:35:35
	0.377626	0.951117	8.45752	0.032446	2015-12-16 18:39:35
	0.217708	0.883828	7.40064	0.0213154	2015-12-16 18:43:35
	0.325712	0.751994	1.93438	0.0382019	2015-12-16 18:47:35
	0.291662	0.741809	1.50857	0.0476187	2015-12-16 18:51:36
	0.162123	0.708186	1.38395	0.0440516	2015-12-16 18:55:36
		0.786705	2.00639	0.0375982	2015-12-16 18:59:36
	0.0318887	0.794042	1.73351	0.036602	2015-12-16 19:03:36
	0.439171	0.748985	1.70688	0.0514819	2015-12-16 19:07:36
	0.202899	0.803945	1.43855	0.0274946	2015-12-16 19:11:45
	0.327573	0.841785	1.52214	0.0454263	2015-12-16 19:15:45
	0.584706	0.781442	1.77329	0.0423044	2015-12-16 19:19:45
	0.693942	0.870621	2.22641	0.048955	2015-12-16 19:23:45
	0.492728	0.69376	1.5556	0.0491754	2015-12-16 19:27:45
	0.0497415	0.669788	1.12563	0.050904	2015-12-16 19:31:45
	0.0902135	0.627053	0.92698	0.0301166	2015-12-16 19:35:45
	0.424238	0.757663	1.87505	0.0395648	2015-12-16 19:39:45
	0.117014	0.924685	6.06183	0.0188961	2015-12-16 19:43:46
	0.0310155	0.76667	3.64786	0.0379055	2015-12-16 19:47:46
	0.280282	0.583933	1.52554	0.0360998	2015-12-16 19:51:46
	0.166945	0.678944	1.60178	0.0490556	2015-12-16 19:55:46
	0.165372	0.830665	5.913	0.027022	2015-12-16 19:59:46
	0.195519	0.539502	1.42145	0.047139	2015-12-16 20:03:46
	0.375909	0.507713	1.22609	0.0282952	2015-12-16 20:07:46
	0.096121	0.753126	5.39156	0.0272438	2015-12-16 20:11:46
7.7889e-05	0.070633	0.334242	0.788829	0.034313	2015-12-16 20:15:46
	0.262674	0.302788	1.10643	0.0384127	2015-12-16 20:19:47
	0.096581	0.396157	0.933567	0.0336131	2015-12-16 20:23:47
		0.565736	4.65447	0.0233863	2015-12-16 20:27:47
		0.710332	8.00871		2015-12-16 20:31:47
	0.397912	0.619483	2.90226	0.0244722	2015-12-16 20:35:47
	0.0292556	0.528326	2.11225	0.0195177	2015-12-16 20:39:47
	0.384939	0.72857	2.98925	0.0263355	2015-12-16 20:43:47
	0.33588	0.80416	1.95031	0.049308	2015-12-16 20:47:47
	0.0195867	0.891829	2.16957	0.0721844	2015-12-16 20:51:48
	0.0548025	1.07193	2.34508	0.131415	2015-12-16 20:55:48
	0.446544	1.10196	2.32146	0.0982382	2015-12-16 20:59:48
0.00786546	0.257427	1.18581	2.4427	0.0848773	2015-12-16 21:03:48
	0.475565	0.995817	2.12989	0.0390726	2015-12-16 21:07:48
	0.125715	0.995947	2.16483	0.0596229	2015-12-16 21:11:48
	0.301875	0.818488	2.07065	0.0423917	2015-12-16 21:15:48
	0.590863	0.813201	2.12111	0.0568129	2015-12-16 21:19:48
	0.579765	0.768224	1.89406	0.0679536	2015-12-16 21:23:48
	0.348238	0.857516	2.14033	0.0367583	2015-12-16 21:27:49
	0.157943	0.826161	2.03103	0.060981	2015-12-16 21:31:49
	0.101111	0.855457	2.25567	0.0390968	2015-12-16 21:35:49
	0.702058	1.04797	1.98567	0.0396695	2015-12-16 21:39:49
	0.279986	1.23345	1.87747	0.0499272	2015-12-16 21:43:49
	0.391037	1.36754	1.71224	0.0420884	2015-12-16 21:47:49
	0.495328	1.44161	1.72442	0.0682409	2015-12-16 21:51:49
	0.739484	1.36863	1.65467	0.0354477	2015-12-16 21:55:49
	0.187859	1.30735	1.64566	0.0563228	2015-12-16 21:59:50
	0.702563	1.47794	1.67352	0.0506511	2015-12-16 22:03:50
	0.670128	1.02839	0.901632	0.0467029	2015-12-16 22:07:50
	0.182163	0.882856	0.730772	0.0406862	2015-12-16 22:11:58
	0.393087	1.2229	1.26934	0.0438349	2015-12-16 22:15:59
	0.307382	1.27596	1.42214	0.0408709	2015-12-16 22:19:59
	0.248352	1.15197	1.08308	0.0228795	2015-12-16 22:23:59
0.000654596	0.452154	1.00657	0.897068	0.0388025	2015-12-16 22:27:59
	0.463631	0.986235	0.677228	0.0591668	2015-12-16 22:31:59
	0.412569	0.808021	0.877881	0.0300177	2015-12-16 22:35:59
	0.308059	0.634633	0.905525	0.0565963	2015-12-16 22:39:59
0.00872955	0.172261	0.758105	0.995901	0.065543	2015-12-16 22:43:59
	0.307166	1.1971	1.38314	0.0554734	2015-12-16 22:47:59
	0.399746	1.23763	1.28562	0.0335592	2015-12-16 22:52:00
	0.353365	1.19262	1.44203	0.0561373	2015-12-16 22:56:00
0.00110576	0.22799	1.30775	1.48341	0.0506749	2015-12-16 23:00:00
	0.426595	1.08575	1.38618	0.0453099	2015-12-16 23:04:00
	0.400877	1.09474	1.33742	0.0425657	2015-12-16 23:08:00
	0.381226	1.25954	1.09208	0.0443361	2015-12-16 23:12:00
	0.5799	1.26924	1.19731	0.0453504	2015-12-16 23:16:00
	0.854221	1.17222	1.27269	0.0275872	2015-12-16 23:20:00
	0.480438	1.30835	0.971902	0.0441714	2015-12-16 23:24:01
	0.521721	1.21115	1.11833	0.0356107	2015-12-16 23:28:01
	0.653878	1.3876	1.05739	0.0304452	2015-12-16 23:32:01
	0.460897	1.15961	1.11655	0.039192	2015-12-16 23:36:01
	0.366702	1.11105	1.22759	0.0430587	2015-12-16 23:40:01
	0.297182	1.05793	1.3764	0.0501456	2015-12-16 23:44:01
	0.299556	1.10389	1.54905	0.0477529	2015-12-16 23:48:01
	0.61222	1.21495	1.22405	0.0394016	2015-12-16 23:52:01
	0.604364	1.15127	1.42353	0.0435392	2015-12-16 23:56:01
	0.247183	1.18215	1.37091	0.062116	2015-12-17 00:00:02
	0.150574	1.203	1.10362	0.0495476	2015-12-17 00:04:02
	0.253746	1.5178	1.22198	0.0423618	2015-12-17 00:08:02
0.00160988	0.681777	1.31669	1.31382	0.0346247	2015-12-17 00:12:02
	0.575079	1.31139	1.51054	0.0433233	2015-12-17 00:16:02
	0.450641	1.37477	1.14113	0.0517118	2015-12-17 00:20:02
	0.267301	1.08425	0.690101	0.0595877	2015-12-17 00:24:02
	0.212211	0.982396	1.02089	0.0580653	2015-12-17 00:28:02
	0.175045	0.684143	0.847468	0.0361801	2015-12-17 00:32:03
	0.385634	0.586223	0.582161	0.0355984	2015-12-17 00:36:03
	0.433072	0.619234	0.711727	0.045219	2015-12-17 00:40:03
	0.22105	0.669868	0.429457	0.0551687	2015-12-17 00:44:03
	0.259703	0.764964	0.373117	0.0531923	2015-12-17 00:48:03
	0.502792	0.763037	0.77542	0.0583303	2015-12-17 00:52:03
	0.521045	0.888929	0.792043	0.0523103	2015-12-17 00:56:03
	0.764771	0.868385	0.484608	0.0324343	2015-12-17 01:00:03
	0.546798	0.866046	0.403264	0.0589829	2015-12-17 01:04:03
0.00274552	0.534413	0.936705	0.720692	0.0582254	2015-12-17 01:08:04
	0.50299	0.828892	0.724847	0.0521992	2015-12-17 01:12:12
	0.358706	0.893762	0.426399	0.0531473	2015-12-17 01:16:12
	0.420711	0.858766	0.366872	0.0659443	2015-12-17 01:20:12
	0.432069	0.742102	0.329855	0.068905	2015-12-17 01:24:13
	0.448815	0.621484	0.415859	0.0441224	2015-12-17 01:28:13
	0.576058	0.515744	0.535168	0.0631471	2015-12-17 01:32:13
	0.434975	0.463299	0.581765	0.0399564	2015-12-17 01:36:13
	0.470899	0.414604	0.436265	0.042156	2015-12-17 01:40:13
		0.364932	0.448721	0.0418794	2015-12-17 01:44:13
	0.1956	0.410057	0.397701	0.0458854	2015-12-17 01:48:13
	0.374997	0.491299	0.438234	0.0504451	2015-12-17 01:52:13
	0.47319	0.853488	0.631734	0.0656633	2015-12-17 01:56:13
	0.324838	0.715102	0.57874	0.0530924	2015-12-17 02:00:14
	0.530595	0.568488	0.680518	0.0493402	2015-12-17 02:04:14
	0.491294	1.01529	0.598892	0.0797882	2015-12-17 02:08:14
	0.419267	0.793038	0.488331	0.0489215	2015-12-17 02:12:14
	0.459998	0.801609	0.779469	0.062058	2015-12-17 02:16:14
	0.157779	0.671034	0.655622	0.0672337	2015-12-17 02:20:14
	0.616132	0.650908	0.624851	0.069613	2015-12-17 02:24:14
	0.302581	0.702391	0.519226	0.0833141	2015-12-17 02:28:14
	0.829521	0.986581	0.560268	0.0996005	2015-12-17 02:32:15
	0.632244	0.97656	0.437746	0.0761115	2015-12-17 02:36:15
	0.37321	1.01533	0.546217	0.0732501	2015-12-17 02:40:15
	0.655788	1.12035	0.879855	0.0785886	2015-12-17 02:44:15
	0.582434	1.0408	0.688938	0.0755993	2015-12-17 02:48:15
	0.674854	1.09878	0.761608	0.0802073	2015-12-17 02:52:15
	0.772478	1.29624	1.02791	0.0893769	2015-12-17 02:56:15
	0.683598	1.31645	0.828704	0.100077	2015-12-17 03:00:15
	0.525961	1.33863	0.894989	0.103112	2015-12-17 03:04:15
	0.729231	1.28456	0.731099	0.104314	2015-12-17 03:08:16
	0.65761	1.30073	0.860067	0.124304	2015-12-17 03:12:16
	0.698892	1.26347	1.01352	0.120991	2015-12-17 03:16:16
	0.860585	1.33362	0.922064	0.113206	2015-12-17 03:20:16
0.0042772	0.888295	1.29891	0.781888	0.111957	2015-12-17 03:24:16
	0.716191	1.34372	0.849756	0.120065	2015-12-17 03:28:16
	0.385035	1.47037	0.800795	0.0911652	2015-12-17 03:32:16
	0.889961	1.57554	0.939883	0.108003	2015-12-17 03:36:16
	1.22555	1.61312	0.839449	0.129118	2015-12-17 03:40:17
	0.721637	1.54578	1.06959	0.106699	2015-12-17 03:44:17
	0.762649	1.4757	0.981178	0.139403	2015-12-17 03:48:17
	0.703778	1.40637	0.75574	0.127592	2015-12-17 03:52:17
	0.345639	1.17011	0.769912	0.090614	2015-12-17 03:56:17
	0.29521	0.810134	0.495741	0.074669	2015-12-17 04:00:17
	0.0156132	0.48774	0.50625	0.0386728	2015-12-17 04:04:17
	0.075291	0.4848	0.564599	0.0394741	2015-12-17 04:08:17
		0.350776	0.447782	0.043268	2015-12-17 04:12:26
		0.376068	0.297807	0.0401819	2015-12-17 04:16:26
	0.138223	0.286216	0.395663	0.0352551	2015-12-17 04:20:26
	0.598418	0.315035	0.370759	0.0412428	2015-12-17 04:24:26
	0.434203	0.191601	0.250659	0.0349507	2015-12-17 04:28:26
0.0011333	0.601821	0.464947	0.142574	0.0453873	2015-12-17 04:32:27
	0.222505	0.256778	0.0270614	0.0479625	2015-12-17 04:36:27
	0.17845	0.460854	0.484625	0.0615902	2015-12-17 04:40:27
	0.402927	0.656212	0.551244	0.0596603	2015-12-17 04:44:27
	0.409201	0.906721	0.753644	0.0932046	2015-12-17 04:48:27
	0.44499	0.898502	0.837731	0.067203	2015-12-17 04:52:27
	0.319316	0.780487	0.775496	0.0415838	2015-12-17 04:56:27
	0.528192	0.71896	0.899134	0.0407593	2015-12-17 05:00:27
	0.352784	0.713599	0.637953	0.0740443	2015-12-17 05:04:28
	0.664502	0.758501	0.59792	0.0627519	2015-12-17 05:08:28
	0.684622	1.17403	0.699134	0.112857	2015-12-17 05:12:28
	0.415029	0.80134	0.675219	0.0948429	2015-12-17 05:16:28
	0.0963584	0.112148	0.184804	0.0268587	2015-12-17 05:20:28
		0.13285	0.279896	0.0343092	2015-12-17 05:24:28
	0.155024	0.106073	0.0831941	0.0311847	2015-12-17 05:28:28
		0.201312		0.015473	2015-12-17 05:32:28
	0.0383825	0.186997	0.114747	0.0134421	2015-12-17 05:36:28
		0.137292	0.424831	0.0507753	2015-12-17 05:40:29
	0.229076	0.774358	0.940017	0.072889	2015-12-17 05:44:29
	0.563193	0.632472	0.688357	0.0859771	2015-12-17 05:48:29
	0.680023	0.585461	0.631128	0.0670735	2015-12-17 05:52:29
	0.39391	0.807345	0.835523	0.0682808	2015-12-17 05:56:29
	0.536362	0.910113	0.715834	0.0825142	2015-12-17 06:00:29
	0.36161	0.777788	0.520708	0.0777916	2015-12-17 06:04:29
	0.57055	0.908359	0.595597	0.0973935	2015-12-17 06:08:29
	0.520817	0.778438	0.961042	0.0724869	2015-12-17 06:12:29
	0.418679	0.674167	1.01878	0.054791	2015-12-17 06:16:30
	0.318903	0.690068	1.17983	0.0504275	2015-12-17 06:20:30
	0.51372	0.636209	1.3424	0.0569742	2015-12-17 06:24:30
	0.355846	0.665253	1.3947	0.0538546	2015-12-17 06:28:30
[truncated: 1,341 more rows]

## Sheet: SMPS_interstitial
Daily matrices with diameter (see diameter bins at the bottom of the sheet) in columns and time of scan in rows
[truncated: 2,277 more rows]
[truncated: 55 more columns]

[truncated: 5 more sheets: sCCNC, SP2_14DecEvent, SP2_15DecEvent, SP2_18DecEvent, SP2_20DecEvent]
